# Supplementary material
Source: PubMed Central journal article supplement (PMC4271735)

# Functionalized olefin cross-coupling as a powerful C–C bond construction

Julian C. Lo,<sup>1\*</sup> Jinghan Gui,<sup>1\*</sup> Yuki Yabe,<sup>1</sup> Chung-Mao Pan<sup>1</sup> & Phil S. Baran<sup>1</sup>

<sup>1</sup>Department of Chemistry, The Scripps Research Institute, 10550 N. Torrey Pines Rd., La Jolla, CA 92037. \*These authors contributed equally to this work.

## SUPPLEMENTARY INFORMATION

### Table of Contents

|                                                                        |      |         |
|------------------------------------------------------------------------|------|---------|
| General Experimental .....                                             | page | S7      |
| Experimental Procedures and Characterization Data for Substrates ..... | page | S8–S12  |
| Compound <b>S1</b> .....                                               | page | S8      |
| Compound <b>S2</b> .....                                               | page | S8      |
| Compound <b>S3</b> .....                                               | page | S9      |
| Compound <b>S4</b> .....                                               | page | S10     |
| Compound <b>S5</b> .....                                               | page | S10     |
| Compound <b>S6</b> .....                                               | page | S11     |
| Preparation of Fe(dibm) <sub>3</sub> ( <b>5</b> ) .....                | page | S13–S15 |
| Figure S1 .....                                                        | page | S13     |
| Table S1 .....                                                         | page | S14     |
| Photographic Guide for the Preparation of Fe(dibm) <sub>3</sub> .....  | page | S16–S20 |
| Figure S2 .....                                                        | page | S16     |
| Figure S3 .....                                                        | page | S16     |
| Figure S4 .....                                                        | page | S17     |
| Figure S5 .....                                                        | page | S17     |
| Figure S6 .....                                                        | page | S18     |
| Figure S7 .....                                                        | page | S18     |
| Figure S8 .....                                                        | page | S19     |
| Figure S9 .....                                                        | page | S19     |
| Figure S10 .....                                                       | page | S20     |
| Figure S11 .....                                                       | page | S20     |
| General Procedure for the Olefin Cross–Coupling .....                  | page | S21     |
| Photographic Guide for the Olefin Cross–Coupling .....                 | page | S22–S27 |
| Figure S12 .....                                                       | page | S22     |
| Figure S13 .....                                                       | page | S22     |
| Figure S14 .....                                                       | page | S23     |

|                                                                     |      |         |
|---------------------------------------------------------------------|------|---------|
| Photographic Guide for the Olefin Cross–Coupling.....               | page | S22–S27 |
| Figure S12.....                                                     | page | S22     |
| Figure S13.....                                                     | page | S22     |
| Figure S14.....                                                     | page | S23     |
| Figure S15.....                                                     | page | S23     |
| Figure S16.....                                                     | page | S24     |
| Figure S17.....                                                     | page | S24     |
| Figure S18.....                                                     | page | S25     |
| Figure S19.....                                                     | page | S25     |
| Figure S20.....                                                     | page | S26     |
| Figure S21.....                                                     | page | S26     |
| Figure S22.....                                                     | page | S27     |
| Experimental Procedures and Characterization Data for Products..... | page | S28–S64 |
| Compound <b>3</b> .....                                             | page | S28     |
| Compound <b>20</b> .....                                            | page | S28     |
| Compound <b>21</b> .....                                            | page | S29     |
| Compound <b>22</b> .....                                            | page | S29     |
| Compound <b>23</b> .....                                            | page | S30     |
| Compound <b>19</b> .....                                            | page | S31     |
| Compound <b>24</b> .....                                            | page | S31     |
| Compound <b>25</b> .....                                            | page | S32     |
| Compound <b>26</b> .....                                            | page | S33     |
| Compound <b>27</b> .....                                            | page | S33     |
| Compound <b>28</b> .....                                            | page | S34     |
| Compound <b>29</b> .....                                            | page | S34     |
| Compound <b>30</b> .....                                            | page | S35     |
| Compound <b>31</b> .....                                            | page | S35     |
| Compound <b>32</b> .....                                            | page | S36     |
| Compound <b>33</b> .....                                            | page | S36     |
| Compound <b>34</b> .....                                            | page | S37     |
| Compound <b>35</b> .....                                            | page | S37     |
| Compound <b>36</b> .....                                            | page | S37     |
| Compound <b>37</b> .....                                            | page | S38     |
| Compound <b>38</b> .....                                            | page | S38     |
| Compound <b>39</b> .....                                            | page | S38     |
| Compound <b>40</b> .....                                            | page | S39     |
| Compound <b>41</b> .....                                            | page | S40     |
| Compound <b>42</b> .....                                            | page | S40     |
| Compound <b>43</b> .....                                            | page | S41     |
| Compound <b>44</b> .....                                            | page | S42     |
| Compound <b>45</b> .....                                            | page | S42     |
| Compound <b>46</b> .....                                            | page | S43     |
| Compound <b>47</b> .....                                            | page | S44     |
| Compound <b>48</b> .....                                            | page | S44     |
| Compound <b>49</b> .....                                            | page | S45     |
| Compound <b>50</b> .....                                            | page | S45     |

|                                                               |      |          |
|---------------------------------------------------------------|------|----------|
| Compound 51.....                                              | page | S46      |
| Compound 52.....                                              | page | S47      |
| Compound 53.....                                              | page | S47      |
| Compound 54.....                                              | page | S48      |
| Compound 55.....                                              | page | S48      |
| Compound 56.....                                              | page | S49      |
| Compound 57.....                                              | page | S49      |
| Compound 58.....                                              | page | S50      |
| Compound 59.....                                              | page | S51      |
| Compound 60.....                                              | page | S51      |
| Compound 61.....                                              | page | S52      |
| Compound 62.....                                              | page | S53      |
| Compound 63.....                                              | page | S53      |
| Compound 64.....                                              | page | S54      |
| Compound 65.....                                              | page | S54      |
| Compound 66.....                                              | page | S55      |
| Compound 67.....                                              | page | S55      |
| Compound 68.....                                              | page | S56      |
| Compound 69.....                                              | page | S57      |
| Compound 70.....                                              | page | S57      |
| Compound 71.....                                              | page | S58      |
| Compound 72.....                                              | page | S58      |
| Compound 73.....                                              | page | S59      |
| Compound 74.....                                              | page | S59      |
| Compound 75.....                                              | page | S60      |
| Compound 76.....                                              | page | S60      |
| Compound 77.....                                              | page | S61      |
| Compound 79.....                                              | page | S62      |
| Compound 81.....                                              | page | S63      |
| Compound 82.....                                              | page | S63      |
| Compound 83.....                                              | page | S64      |
| Use of Unconventional Solvents for Olefin Cross–Coupling..... | page | S65–S69  |
| Table S2.....                                                 | page | S65      |
| Figure S23.....                                               | page | S65      |
| Figure S24.....                                               | page | S66      |
| Figure S25.....                                               | page | S66      |
| Figure S26.....                                               | page | S67      |
| Figure S27.....                                               | page | S67      |
| Figure S28.....                                               | page | S68      |
| Figure S29.....                                               | page | S68      |
| Figure S30.....                                               | page | S69      |
| References.....                                               | page | S70–S72  |
| Spectra for Compounds.....                                    | page | S73–S209 |
| Compound S1 <sup>1</sup> H NMR.....                           | page | S73      |
| Compound S1 <sup>13</sup> C NMR.....                          | page | S74      |
| Compound S2 <sup>1</sup> H NMR.....                           | page | S75      |

|                    |                     |      |      |
|--------------------|---------------------|------|------|
| Compound <b>S2</b> | <sup>13</sup> C NMR | page | S76  |
| Compound <b>S3</b> | <sup>1</sup> H NMR  | page | S77  |
| Compound <b>S3</b> | <sup>13</sup> C NMR | page | S78  |
| Compound <b>S4</b> | <sup>1</sup> H NMR  | page | S79  |
| Compound <b>S4</b> | <sup>13</sup> C NMR | page | S80  |
| Compound <b>S4</b> | <sup>11</sup> B NMR | page | S81  |
| Compound <b>S5</b> | <sup>1</sup> H NMR  | page | S82  |
| Compound <b>S5</b> | <sup>13</sup> C NMR | page | S83  |
| Compound <b>S5</b> | <sup>19</sup> F NMR | page | S84  |
| Compound <b>S6</b> | <sup>1</sup> H NMR  | page | S85  |
| Compound <b>S6</b> | <sup>13</sup> C NMR | page | S86  |
| Compound <b>3</b>  | <sup>1</sup> H NMR  | page | S87  |
| Compound <b>3</b>  | <sup>13</sup> C NMR | page | S88  |
| Compound <b>20</b> | <sup>1</sup> H NMR  | page | S89  |
| Compound <b>20</b> | <sup>13</sup> C NMR | page | S90  |
| Compound <b>21</b> | <sup>1</sup> H NMR  | page | S91  |
| Compound <b>21</b> | <sup>13</sup> C NMR | page | S92  |
| Compound <b>22</b> | <sup>1</sup> H NMR  | page | S93  |
| Compound <b>22</b> | <sup>13</sup> C NMR | page | S94  |
| Compound <b>23</b> | <sup>1</sup> H NMR  | page | S95  |
| Compound <b>23</b> | <sup>13</sup> C NMR | page | S96  |
| Compound <b>19</b> | <sup>1</sup> H NMR  | page | S97  |
| Compound <b>19</b> | <sup>13</sup> C NMR | page | S98  |
| Compound <b>24</b> | <sup>1</sup> H NMR  | page | S99  |
| Compound <b>24</b> | <sup>13</sup> C NMR | page | S100 |
| Compound <b>25</b> | <sup>1</sup> H NMR  | page | S101 |
| Compound <b>25</b> | <sup>13</sup> C NMR | page | S102 |
| Compound <b>25</b> | 2D NOESY            | page | S103 |
| Compound <b>26</b> | <sup>1</sup> H NMR  | page | S104 |
| Compound <b>26</b> | <sup>13</sup> C NMR | page | S105 |
| Compound <b>27</b> | <sup>1</sup> H NMR  | page | S106 |
| Compound <b>27</b> | <sup>13</sup> C NMR | page | S107 |
| Compound <b>28</b> | <sup>1</sup> H NMR  | page | S108 |
| Compound <b>28</b> | <sup>13</sup> C NMR | page | S109 |
| Compound <b>29</b> | <sup>1</sup> H NMR  | page | S110 |
| Compound <b>29</b> | <sup>13</sup> C NMR | page | S111 |
| Compound <b>33</b> | <sup>1</sup> H NMR  | page | S112 |
| Compound <b>33</b> | <sup>13</sup> C NMR | page | S113 |
| Compound <b>38</b> | <sup>1</sup> H NMR  | page | S114 |
| Compound <b>38</b> | <sup>13</sup> C NMR | page | S115 |
| Compound <b>39</b> | <sup>1</sup> H NMR  | page | S116 |
| Compound <b>39</b> | <sup>13</sup> C NMR | page | S117 |
| Compound <b>40</b> | <sup>1</sup> H NMR  | page | S118 |
| Compound <b>40</b> | <sup>13</sup> C NMR | page | S119 |
| Compound <b>41</b> | <sup>1</sup> H NMR  | page | S120 |
| Compound <b>41</b> | <sup>13</sup> C NMR | page | S121 |

|             |                     |      |      |
|-------------|---------------------|------|------|
| Compound 42 | <sup>1</sup> H NMR  | page | S122 |
| Compound 42 | <sup>13</sup> C NMR | page | S123 |
| Compound 43 | <sup>1</sup> H NMR  | page | S124 |
| Compound 43 | <sup>13</sup> C NMR | page | S125 |
| Compound 44 | <sup>1</sup> H NMR  | page | S126 |
| Compound 44 | <sup>13</sup> C NMR | page | S127 |
| Compound 45 | <sup>1</sup> H NMR  | page | S128 |
| Compound 45 | <sup>13</sup> C NMR | page | S129 |
| Compound 46 | <sup>1</sup> H NMR  | page | S130 |
| Compound 46 | <sup>13</sup> C NMR | page | S131 |
| Compound 47 | <sup>1</sup> H NMR  | page | S132 |
| Compound 47 | <sup>13</sup> C NMR | page | S133 |
| Compound 48 | <sup>1</sup> H NMR  | page | S134 |
| Compound 48 | <sup>13</sup> C NMR | page | S135 |
| Compound 49 | <sup>1</sup> H NMR  | page | S136 |
| Compound 49 | <sup>13</sup> C NMR | page | S137 |
| Compound 50 | <sup>1</sup> H NMR  | page | S138 |
| Compound 50 | <sup>13</sup> C NMR | page | S139 |
| Compound 51 | <sup>1</sup> H NMR  | page | S140 |
| Compound 51 | <sup>13</sup> C NMR | page | S141 |
| Compound 52 | <sup>1</sup> H NMR  | page | S142 |
| Compound 52 | <sup>13</sup> C NMR | page | S143 |
| Compound 53 | <sup>1</sup> H NMR  | page | S144 |
| Compound 53 | <sup>13</sup> C NMR | page | S145 |
| Compound 54 | <sup>1</sup> H NMR  | page | S146 |
| Compound 54 | <sup>13</sup> C NMR | page | S147 |
| Compound 55 | <sup>1</sup> H NMR  | page | S148 |
| Compound 55 | <sup>13</sup> C NMR | page | S149 |
| Compound 56 | <sup>1</sup> H NMR  | page | S150 |
| Compound 56 | <sup>13</sup> C NMR | page | S151 |
| Compound 57 | <sup>1</sup> H NMR  | page | S152 |
| Compound 57 | <sup>13</sup> C NMR | page | S153 |
| Compound 57 | <sup>11</sup> B NMR | page | S154 |
| Compound 58 | <sup>1</sup> H NMR  | page | S155 |
| Compound 58 | <sup>13</sup> C NMR | page | S156 |
| Compound 58 | <sup>11</sup> B NMR | page | S157 |
| Compound 59 | <sup>1</sup> H NMR  | page | S158 |
| Compound 59 | <sup>13</sup> C NMR | page | S159 |
| Compound 59 | <sup>11</sup> B NMR | page | S160 |
| Compound 60 | <sup>1</sup> H NMR  | page | S161 |
| Compound 60 | <sup>13</sup> C NMR | page | S162 |
| Compound 60 | <sup>11</sup> B NMR | page | S163 |
| Compound 61 | <sup>1</sup> H NMR  | page | S164 |
| Compound 61 | <sup>13</sup> C NMR | page | S165 |
| Compound 61 | <sup>11</sup> B NMR | page | S166 |
| Compound 62 | <sup>1</sup> H NMR  | page | S167 |

|             |                                                     |      |      |
|-------------|-----------------------------------------------------|------|------|
| Compound 62 | <sup>13</sup> C NMR                                 | page | S168 |
| Compound 62 | <sup>11</sup> B NMR                                 | page | S169 |
| Compound 63 | <sup>1</sup> H NMR                                  | page | S170 |
| Compound 63 | <sup>13</sup> C NMR                                 | page | S171 |
| Compound 64 | <sup>1</sup> H NMR                                  | page | S172 |
| Compound 64 | <sup>13</sup> C NMR                                 | page | S173 |
| Compound 65 | <sup>1</sup> H NMR                                  | page | S174 |
| Compound 65 | <sup>13</sup> C NMR                                 | page | S175 |
| Compound 66 | <sup>1</sup> H NMR                                  | page | S176 |
| Compound 66 | <sup>13</sup> C NMR                                 | page | S177 |
| Compound 67 | <sup>1</sup> H NMR                                  | page | S178 |
| Compound 67 | <sup>13</sup> C NMR                                 | page | S179 |
| Compound 68 | <sup>1</sup> H NMR                                  | page | S180 |
| Compound 68 | <sup>13</sup> C NMR                                 | page | S181 |
| Compound 69 | <sup>1</sup> H NMR                                  | page | S182 |
| Compound 69 | <sup>13</sup> C NMR                                 | page | S183 |
| Compound 70 | <sup>1</sup> H NMR                                  | page | S184 |
| Compound 70 | <sup>13</sup> C NMR                                 | page | S185 |
| Compound 71 | <sup>1</sup> H NMR                                  | page | S186 |
| Compound 71 | <sup>13</sup> C NMR                                 | page | S187 |
| Compound 71 | <sup>19</sup> F NMR                                 | page | S188 |
| Compound 72 | <sup>1</sup> H NMR                                  | page | S189 |
| Compound 72 | <sup>13</sup> C NMR                                 | page | S190 |
| Compound 73 | <sup>1</sup> H NMR                                  | page | S191 |
| Compound 73 | <sup>13</sup> C NMR                                 | page | S192 |
| Compound 74 | <sup>1</sup> H NMR                                  | page | S193 |
| Compound 74 | <sup>13</sup> C NMR                                 | page | S194 |
| Compound 75 | <sup>1</sup> H NMR                                  | page | S195 |
| Compound 75 | <sup>13</sup> C NMR                                 | page | S196 |
| Compound 76 | <sup>1</sup> H NMR                                  | page | S197 |
| Compound 76 | <sup>13</sup> C NMR                                 | page | S198 |
| Compound 77 | <sup>1</sup> H NMR                                  | page | S199 |
| Compound 77 | <sup>13</sup> C NMR                                 | page | S200 |
| Compound 79 | <sup>1</sup> H NMR (CDCl <sub>3</sub> )             | page | S201 |
| Compound 79 | <sup>1</sup> H NMR (C <sub>6</sub> D <sub>6</sub> ) | page | S202 |
| Compound 79 | <sup>13</sup> C NMR                                 | page | S203 |
| Compound 81 | <sup>1</sup> H NMR                                  | page | S204 |
| Compound 81 | <sup>13</sup> C NMR                                 | page | S205 |
| Compound 82 | <sup>1</sup> H NMR                                  | page | S206 |
| Compound 82 | <sup>13</sup> C NMR                                 | page | S207 |
| Compound 83 | <sup>1</sup> H NMR                                  | page | S208 |
| Compound 83 | <sup>13</sup> C NMR                                 | page | S209 |

## General Experimental

Dry tetrahydrofuran (THF) and dichloromethane (DCM) was obtained by passing the previously degassed solvent through an activated alumina column. Reagents were purchased at the highest commercial quality and used without further purification, unless otherwise stated. Yields refer to chromatographically and spectroscopically ( $^1\text{H}$  NMR) homogeneous material, unless otherwise stated. Reactions were monitored by thin layer chromatography (TLC) carried out on 0.25 mm E. Merck silica plates (60F-254), using shortwave UV light as the visualizing agent and a solution of vanillin and heat, *p*-anisaldehyde and heat, bromocresol green and heat, or  $\text{KMnO}_4$  and heat as developing agents. Flash column chromatography was performed using E. Merck silica gel (60, particle size 0.043–0.063 mm). NMR spectra were recorded on Bruker AVIII-600, DRX-500, AV-400, and DPX-400 instruments and were calibrated using residual undeuterated solvent as an internal reference ( $\text{CHCl}_3$ : 7.26 ppm  $^1\text{H}$  NMR, 77.16 ppm  $^{13}\text{C}$  NMR;  $\text{C}_6\text{D}_6$ : 7.16 ppm  $^1\text{H}$  NMR, 128.06 ppm  $^{13}\text{C}$  NMR; acetone- $\text{d}_6$ : 2.05 ppm  $^1\text{H}$  NMR, 29.84 ppm  $^{13}\text{C}$  NMR). The following abbreviations were used to explain NMR peak multiplicities: s = singlet, d = doublet, t = triplet, q = quartet, m = multiplet, br = broad. High-resolution mass spectra (HRMS) were recorded on an Agilent LC/MS TOF mass spectrometer using electrospray ionization time-of-flight (ESI-TOF) reflectron experiments. GC/MS experiments were recorded on an Agilent quadrupolar mass spectrometer using electron ionization (70 eV). IR experiments were recorded on a Perkin-Elmer Spectrum 100 FT-IR spectrometer.

## Experimental Procedures and Characterization Data for Substrates

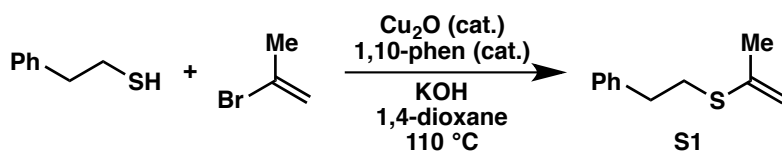

**Phenethyl(prop-1-en-2-yl)sulfide (S1).** Following the method of Kao and Lee,<sup>1</sup> 2-phenylethanethiol (670  $\mu\text{L}$ , 5.00 mmol, 1.0 equiv) was added to a solution of KOH (560 mg, 10.0 mmol, 2.0 equiv),  $\text{Cu}_2\text{O}$  (35.8 mg, 250  $\mu\text{mol}$ , 5 mol %), 1,10-phenanthroline (90.1 mg, 500  $\mu\text{mol}$ , 10 mol %) and 2-bromopropene (533  $\mu\text{L}$ , 6.00 mmol, 1.2 equiv) in 1,4-dioxane (2.5 mL). The reaction mixture was then heated at  $110\text{ }^\circ\text{C}$  with stirring for 12 h, cooled to rt, the reaction diluted with ethyl acetate, and filtered directly through a pad of Celite<sup>®</sup>. Concentration under reduced pressure and purification by flash column chromatography ( $\text{SiO}_2$ , 100:1 hexanes:EtOAc) furnished thioether **S1** as a colorless oil (445 mg, 2.50 mmol, 50%).

**Physical State:** colorless oil.

**$^1\text{H NMR}$**  (600 MHz,  $\text{CDCl}_3$ ):  $\delta$  7.33 – 7.30 (m, 2 H), 7.25 – 7.22 (m, 3 H), 5.04 (q,  $J = 1.4$  Hz, 1 H), 4.77 (q,  $J = 0.7$  Hz, 1 H), 2.98 – 2.92 (m, 4 H), and 1.99 (dd,  $J = 1.4, 0.7$  Hz, 3 H).

**$^{13}\text{C NMR}$**  (151 MHz,  $\text{CDCl}_3$ ):  $\delta$  140.7, 140.5, 128.7, 128.6, 126.6, 106.8, 35.0, 32.9, and 23.7.

**HRMS ( $m/z$ ):** calcd for  $\text{C}_{11}\text{H}_{15}\text{S}$  [ $\text{M}+\text{H}$ ]<sup>+</sup>: 179.0889, found: 179.0893.

**IR (film)  $\nu_{\text{max}}$ :** 2919, 1495, 1452, 1192, 840, and 695  $\text{cm}^{-1}$ .

**TLC:**  $R_f = 0.75$  (10:1 hexanes:EtOAc).

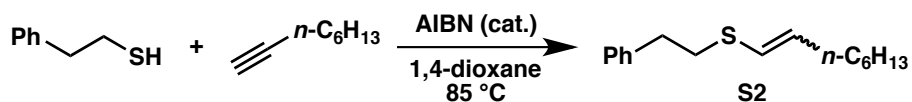

**Oct-1-en-1-yl(phenethyl)sulfide (S2).** Following the method of Lee, Baggiolini, and Uskoković,<sup>2</sup> a solution of 2-phenylethanethiol (402  $\mu\text{L}$ , 3.00 mmol, 1.0 equiv), oct-1-yne (664  $\mu\text{L}$ , 4.50 mmol, 1.5 equiv), and 2,2'-azobis(2-methylpropionitrile) (24.6 mg, 150  $\mu\text{mol}$ , 5 mol %) in 1,4-dioxane (3.0 mL) was heated at  $85\text{ }^\circ\text{C}$  with stirring for 11 h. The reaction mixture was cooled to rt, concentrated under reduced pressure, and purified by flash column chromatography ( $\text{SiO}_2$ , 100:1 hexanes:EtOAc) to furnish thioether **S2** as 1:1.4 mixture of *E*:*Z* olefin isomers (574 mg, 2.31 mmol, 77%). Data is reported for the mixture of olefin isomers.

**Physical State:** colorless oil.



**<sup>1</sup>H NMR** (600 MHz, CDCl<sub>3</sub>): δ 7.32 – 7.29 (m, 2 H), 7.24 – 7.20 (m, 3 H), 5.93 – 5.90 (m, 1 H), 5.69 (dt, *J* = 15.0, 7.2 Hz, 0.58 H), 5.60 (dt, *J* = 9.0, 7.2 Hz, 0.42 H), 2.94 – 2.87 (m, 4 H), 2.13 (dtd, *J* = 7.2, 7.2, 1.2 Hz, 0.84 H), 2.09 (dtd, *J* = 7.2, 7.2, 1.3 Hz, 1.16 H), 1.42 – 1.35 (m, 2 H), 1.33 – 1.26 (m, 6 H), and 0.90 – 0.88 (m, 3 H).

**<sup>13</sup>C NMR** (151 MHz, CDCl<sub>3</sub>): δ 140.5, 140.4, 132.1, 130.6, 128.7, 128.7, 128.6, 126.5, 124.5, 122.2, 37.0, 36.2, 35.4, 34.4, 33.4, 31.9, 31.8, 29.4, 29.3, 29.1, 29.1, 28.9, 22.8, 22.8, and 14.2. 3 carbons were not observed due to incidental equivalence.

**HRMS (*m/z*):** calcd for C<sub>16</sub>H<sub>25</sub>S [M+H]<sup>+</sup>: 249.1671, found: 249.1672.

**IR (film) *v*<sub>max</sub>:** 2922, 2852, 1453, 1272, 1029, 938, and 694 cm<sup>-1</sup>.

**TLC:** R<sub>f</sub> = 0.55 (10:1 hexanes:EtOAc).

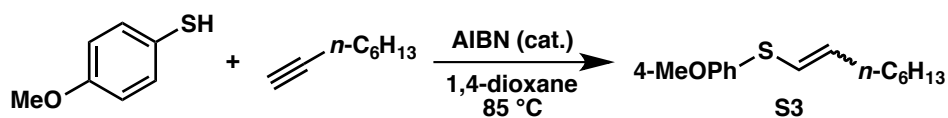

**(4-Methoxyphenyl)(oct-1-en-1-yl)sulfide (S3).** Following the method of Lee, Baggiolini, and Uskoković,<sup>2</sup> a solution of 4-methoxybenzenethiol (369 μL, 3.00 mmol, 1.0 equiv), oct-1-yne (664 mL, 4.50 mmol, 1.5 equiv), and 2,2'-azobis(2-methylpropionitrile) (24.6 mg, 150 μmol, 5 mol %) in 1,4-dioxane (3.0 mL) was heated at 85 °C with stirring for 11 h. The reaction mixture was cooled to rt, concentrated under reduced pressure, and purified by flash column chromatography (SiO<sub>2</sub>, 100:1 hexanes:EtOAc) to furnish thioether **S3** as a 1:1 mixture of *E*:*Z* olefin isomers (480 mg, 1.92 mmol, 64%). Data is reported for the mixture of olefin isomers.

**Physical State:** colorless oil.

**<sup>1</sup>H NMR** (600 MHz, CDCl<sub>3</sub>): δ 7.32 – 7.29 (m, 2 H), 6.87 – 6.85 (m, 2 H), 6.10 – 6.01 (m, 1 H), 5.80 (dt, *J* = 15.0, 7.2 Hz, 0.5 H), 5.68 (dt, *J* = 9.6, 7.2 Hz, 0.5 H), 3.80 (s, 3 H), 2.22 (dt, *J* = 7.2, 7.2 Hz, 1 H), 2.11 (dt, *J* = 7.2, 7.2 Hz, 1 H), 1.46 – 1.26 (m, 8H), and 0.91 – 0.87 (m, 3 H).

**<sup>13</sup>C NMR** (151 MHz, CDCl<sub>3</sub>): δ 159.0, 158.9, 134.7, 132.1, 131.9, 131.6, 127.0, 126.4, 125.0, 122.9, 114.8, 114.8, 55.5, 33.1, 31.8, 31.8, 29.2, 29.2, 29.1, 28.9, 22.8, 22.8, 14.3, and 14.2. 2 carbons were not observed due to incidental equivalence.

**HRMS (*m/z*):** calcd for C<sub>15</sub>H<sub>23</sub>OS [M+H]<sup>+</sup>: 251.1464, found: 251.1469.

**IR (film) *v*<sub>max</sub>:** 2924, 2854, 1492, 1243, 1031, 823, and 721 cm<sup>-1</sup>.

**TLC:** R<sub>f</sub> = 0.55 (10:1 hexanes:EtOAc).

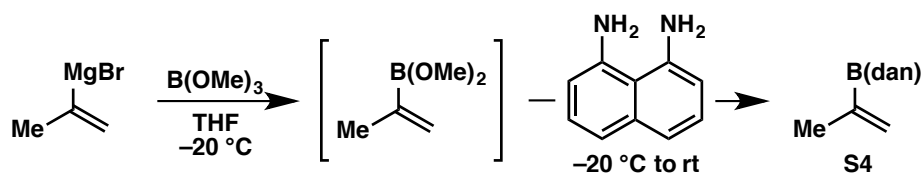

**Isopropenyl 1,8-diaminonaphthyl boronamide (S4).** To a solution of trimethyl borate (500  $\mu$ L, 4.48 mmol, 1.0 equiv) in THF (4.5 mL) under an Ar atmosphere was added a solution of freshly prepared isopropenylmagnesium bromide<sup>3</sup> (0.68 M in THF, 398  $\mu$ L, 4.48 mmol, 1.0 equiv) at  $-20$   $^{\circ}$ C with stirring. The reaction mixture turned milky white upon stirring at  $-20$   $^{\circ}$ C for 30 min, at which point 1,8-diaminonaphthalene (710 mg, 4.48 mmol, 1.0 equiv) was added in one portion. After stirring for 70 min at  $-20$   $^{\circ}$ C, the reaction mixture was warmed to room temperature and then quenched with a saturated aqueous solution of  $\text{NH}_4\text{Cl}$ . The organic layer was separated and the aqueous layer was extracted with EtOAc. The organic layers were combined, washed with brine, dried over  $\text{MgSO}_4$ , filtered, and concentrated under reduced pressure. Purification by flash column chromatography ( $\text{SiO}_2$ , 9:1 hexanes:EtOAc) furnished boronamide **S4** as a white solid (555 mg, 2.67 mmol, 59%).

**Physical State:** white solid.

**Melting Point:** 91.4–91.6  $^{\circ}$ C.

**$^1\text{H}$  NMR** (600 MHz,  $\text{CDCl}_3$ ):  $\delta$  7.11 (dd,  $J = 8.0, 8.0$  Hz, 2 H), 7.02 (d,  $J = 8.2$  Hz, 2 H), 6.35 (d,  $J = 7.3$  Hz, 2 H), 5.76 (br s, 2 H), 5.57 (br s, 1 H), 5.51 (br s, 1 H), and 1.92 (s, 3 H).

**$^{13}\text{C}$  NMR** (151 MHz,  $\text{CDCl}_3$ ):  $\delta$  141.2, 136.5, 127.7, 124.6, 119.9, 117.7, 105.9, and 21.6. The boron-bound carbon was not observed due to quadrupolar relaxation.

**$^{11}\text{B}$  NMR** (128 MHz,  $\text{CDCl}_3$ ):  $\delta$  8.7.

**HRMS ( $m/z$ ):** calcd for  $\text{C}_{13}\text{H}_{14}\text{BN}_2$   $[\text{M}+\text{H}]^+$ : 209.1245, found: 209.1252.

**IR (film)  $\nu_{\text{max}}$ :** 3413, 3050, 2959, 1624, 1596, 1505, 1411, 1327, 1118, and 928  $\text{cm}^{-1}$ .

**TLC:**  $R_f = 0.48$  (9:1 hexanes:EtOAc).

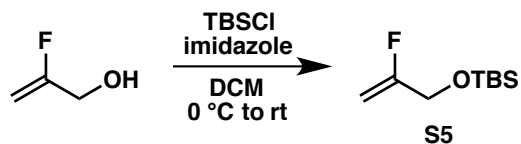

**tert-Butyl((2-fluoroallyl)oxy)dimethylsilane (S5).** To a solution of 2-fluoro-2-propen-1-ol<sup>4</sup> (439 mg, 5.77 mmol, 1.0 equiv) and imidazole (786 mg, 11.5 mmol, 2.0 equiv) in DCM (19 mL) was added TBSCl (1.30 g, 8.66 mmol, 1.5 equiv) at  $0$   $^{\circ}$ C with stirring. The reaction mixture was

warmed to room temperature over 2 h and was quenched with a saturated aqueous solution of  $\text{NH}_4\text{Cl}$ . The organic layer was separated and the aqueous layer was extracted with  $\text{Et}_2\text{O}$ . The organic layers were combined, washed with brine, dried over  $\text{MgSO}_4$ , filtered, and concentrated under reduced pressure. Purification by flash column chromatography ( $\text{SiO}_2$ , pentane) furnished fluoride **S5** as a colorless oil (1.05 g, 5.49 mmol, 95%).

**Physical State:** colorless oil.

**$^1\text{H}$  NMR** (600 MHz,  $\text{CDCl}_3$ ):  $\delta$  4.65 (ddt,  $J = 17.2, 2.8, 0.7$  Hz, 1 H), 4.54 (ddt,  $J = 49.3, 2.9, 1.2$  Hz, 1 H), 4.14 (dd,  $J = 0.9, 0.9$  Hz, 1 H), 4.13 (dd,  $J = 0.9, 0.9$  Hz, 1 H), 0.92 (s, 9 H), and 0.10 (s, 6 H).

**$^{13}\text{C}$  NMR** (151 MHz,  $\text{CDCl}_3$ ):  $\delta$  165.1 (d,  $J = 257.4$  Hz), 90.0 (d,  $J = 17.4$  Hz), 60.9 (d,  $J = 38.3$  Hz), 25.9, 18.5, and  $-5.3$ .

**$^{19}\text{F}$  NMR** (376 MHz,  $\text{CDCl}_3$ ):  $\delta$   $-108.4$ .

**GC/MS ( $m/z$ ):**  $[\text{M}-t\text{-Bu}]^+$ : 133.

**IR (film)  $\nu_{\text{max}}$ :** 2955, 2931, 2888, 2859, 1680, 1465, 1393, 1255, 1222, 1126, 937, and  $824\text{ cm}^{-1}$ .

**TLC:**  $R_f = 0.74$  (9:1 hexanes:EtOAc).

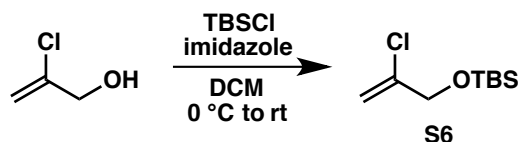

**tert-Butyl((2-chloroallyl)oxy)dimethylsilane (S6).** To a solution of 2-chloro-2-propen-1-ol (200 mg, 2.16 mmol, 1.0 equiv) and imidazole (294 mg, 4.32 mmol, 2.0 equiv) in DCM (7.0 mL) was added TBSCl (489 mg, 3.24 mmol, 1.5 equiv) at 0 °C with stirring. The reaction mixture was warmed to room temperature over 75 min and was quenched with a saturated aqueous solution of  $\text{NH}_4\text{Cl}$ . The organic layer was separated and the aqueous layer was extracted with  $\text{Et}_2\text{O}$ . The organic layers were combined, washed with brine, dried over  $\text{MgSO}_4$ , filtered, and concentrated under reduced pressure. Purification by flash column chromatography ( $\text{SiO}_2$ , hexanes) furnished chloride **S6** as a colorless oil (311 mg, 1.50 mmol, 69%).

**Physical State:** colorless oil.

**$^1\text{H}$  NMR** (600 MHz,  $\text{CDCl}_3$ ):  $\delta$  5.50 (dd,  $J = 3.1, 1.6$  Hz, 1 H), 5.29 (dd,  $J = 2.9, 1.4$  Hz, 1 H), 4.16 (dd,  $J = 1.6, 1.6$  Hz, 2 H), 0.92 (s, 9 H), and 0.10 (s, 6 H).

**$^{13}\text{C}$  NMR** (151 MHz,  $\text{CDCl}_3$ ):  $\delta$  140.6, 110.7, 65.9, 25.9, 18.5, and  $-5.3$ .

**GC/MS (*m/z*):** [M-*t*-Bu]<sup>+</sup>: 149.

**IR (film)  $\nu_{\text{max}}$ :** 2955, 2930, 2888, 2858, 1460, 1255, 1157, 1091, 1007, 884, and 835 cm<sup>-1</sup>.

**TLC:** R<sub>f</sub> = 0.45 (9:1 hexanes:EtOAc).

## Preparation of Fe(dibm)<sub>3</sub>

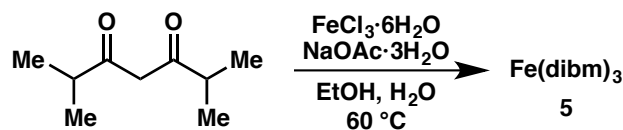

**Iron(III) diisobutyrylmethane (5).** To a biphasic mixture of 2,6-dimethylheptane-3,5-dione (2.60 g, 16.6 mmol, 3.0 equiv) and NaOAc·3H<sub>2</sub>O (2.27 g, 16.6 mmol, 3.0 equiv) in an aqueous solution of EtOH (1:1 EtOH:H<sub>2</sub>O, 42 mL) was added ground FeCl<sub>3</sub>·6H<sub>2</sub>O (1.50 g, 5.55 mmol, 1.0 equiv). A red slurry formed and the reaction mixture was heated at 60 °C with stirring for 1 h. The slurry was cooled at room temperature over 10 min, cooled at 0 °C for 15 min, and then filtered to give an orange powder. The orange powder was rinsed with H<sub>2</sub>O, collected, placed in an Erlenmeyer flask, and heated with an aqueous solution of EtOH (9:1 EtOH:H<sub>2</sub>O, 30 mL) using a heat gun until fully dissolved to give a red, homogenous solution. The solution was cooled to room temperature and then to 0 °C to give red crystals, which were filtered and rinsed with a –78 °C aqueous solution of EtOH (9:1 EtOH:H<sub>2</sub>O, 10 mL) to furnish Fe(dibm)<sub>3</sub> (**5**) as a red crystalline solid (1.91 g, 3.67 mmol, 66%). A small amount was recrystallized from MeOH to provide crystals suitable for X-ray analysis.

**Physical State:** red crystalline solid.

**Melting Point:** 99.2–99.5 °C.

**Elemental Analysis:** calcd for C<sub>27</sub>H<sub>45</sub>FeO<sub>6</sub>: C, 62.19; H, 8.70; N, 0.00 found: C, 62.16; H, 8.64; N, 0.00.

**IR (film)  $\nu_{\text{max}}$ :** 2964, 2930, 2870, 1563, 1531, 1500, 1403, 1295, 1158, 1091, 922, and 789 cm<sup>-1</sup>.

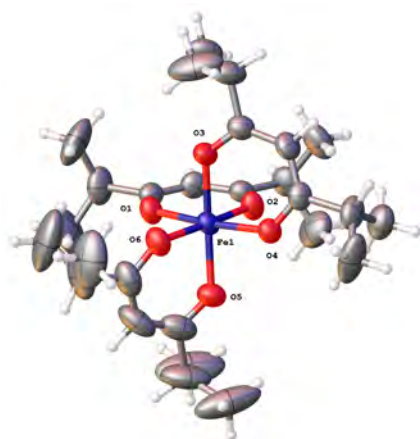

**Figure S1.** X-ray crystallographic structure of Fe(dibm)<sub>3</sub> (**5**).

The single crystal X-ray diffraction studies were carried out on a Bruker Kappa APEX-II CCD diffractometer equipped with Mo K<sub>α</sub> radiation ( $\lambda = 0.71073 \text{ \AA}$ ). A 0.115 x 0.053 x 0.044 mm red block was mounted on a Cryoloop with Paratone oil. Data were collected in a nitrogen gas stream at 175(2) K using  $\theta$  and  $\psi$  scans. Crystal-to-detector distance was 40 mm using variable exposure time (30s or 60s) depending on  $\theta$  with a scan width of 1.0°. Data collection was 100% complete to 25.00° in  $\theta$ . A total of 75632 reflections were collected covering the indices,  $-14 \leq h \leq 13$ ,  $-23 \leq k \leq 23$ ,  $-18 \leq l \leq 18$ . 6312 reflections were found to be symmetry independent, with a  $R_{\text{int}}$  of 0.0793. Indexing and unit cell refinement indicated a primitive, monoclinic lattice. The space group was found to be  $P2_1/c$ . The data were integrated using the Bruker SAINT software program and scaled using the SADABS software program. Solution by direct methods (SHELXT) produced a complete phasing model consistent with the proposed structure.

All nonhydrogen atoms were refined anisotropically by full-matrix least-squares (SHELXL-2013). All hydrogen atoms were placed using a riding model. Their positions were constrained relative to their parent atom using the appropriate HFIX command in SHELXL-2014. Crystallographic data are summarized in Table S1.

**Table S1.** Crystal data and structure refinement for Fe(dibm)<sub>3</sub> (**5**).

|                        |                                                   |                            |
|------------------------|---------------------------------------------------|----------------------------|
| Identification code    | CCDC 1022625                                      |                            |
| Empirical formula      | C <sub>27</sub> H <sub>45</sub> Fe O <sub>6</sub> |                            |
| Molecular formula      | C <sub>27</sub> H <sub>45</sub> Fe O <sub>6</sub> |                            |
| Formula weight         | 521.48                                            |                            |
| Temperature            | 175 K                                             |                            |
| Wavelength             | 0.71073 Å                                         |                            |
| Crystal system         | Monoclinic                                        |                            |
| Space group            | $P 1 2_1/n 1$                                     |                            |
| Unit cell dimensions   | $a = 11.3761(2) \text{ \AA}$                      | $a = 90^\circ$ .           |
|                        | $b = 18.9915(5) \text{ \AA}$                      | $b = 105.0130(14)^\circ$ . |
|                        | $c = 14.7639(4) \text{ \AA}$                      | $g = 90^\circ$ .           |
| Volume                 | $3080.85(13) \text{ \AA}^3$                       |                            |
| Z                      | 4                                                 |                            |
| Density (calculated)   | $1.124 \text{ Mg/m}^3$                            |                            |
| Absorption coefficient | $0.522 \text{ mm}^{-1}$                           |                            |
| F(000)                 | 1124                                              |                            |
| Crystal size           | $0.115 \times 0.053 \times 0.044 \text{ mm}^3$    |                            |

|                                   |                                             |
|-----------------------------------|---------------------------------------------|
| Crystal color, habit              | Red Block                                   |
| Theta range for data collection   | 1.786 to 26.423°.                           |
| Index ranges                      | -14<=h<=13, -23<=k<=23, -18<=l<=18          |
| Reflections collected             | 75632                                       |
| Independent reflections           | 6312 [R(int) = 0.0793]                      |
| Completeness to theta = 25.000°   | 100.0 %                                     |
| Absorption correction             | Semi-empirical from equivalents             |
| Max. and min. transmission        | 0.7454 and 0.7010                           |
| Refinement method                 | Full-matrix least-squares on F <sup>2</sup> |
| Data / restraints / parameters    | 6312 / 0 / 319                              |
| Goodness-of-fit on F <sup>2</sup> | 1.053                                       |
| Final R indices [I>2sigma(I)]     | R1 = 0.0579, wR2 = 0.1332                   |
| R indices (all data)              | R1 = 0.1076, wR2 = 0.1599                   |
| Extinction coefficient            | n/a                                         |
| Largest diff. peak and hole       | 0.447 and -0.395 e.Å <sup>-3</sup>          |

## Photographic Guide for the Preparation of $\text{Fe}(\text{dibm})_3$

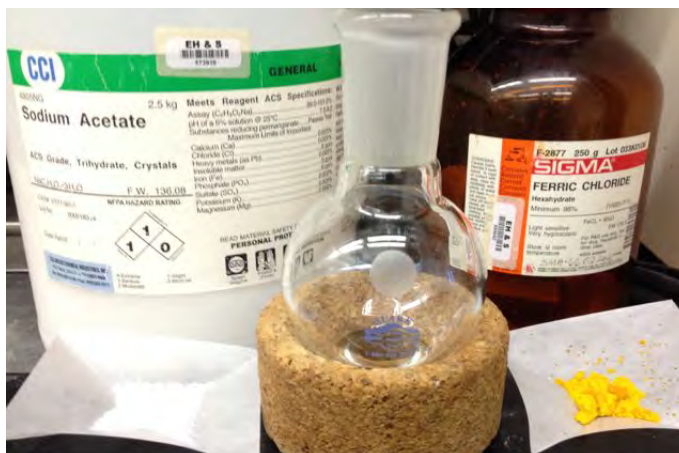

**Figure S2.** Reagents used in the synthesis of  $\text{Fe}(\text{dibm})_3$ . From left to right:  $\text{NaOAc}\cdot 3\text{H}_2\text{O}$ , 2,6-dimethylheptane-3,5-dione,  $\text{FeCl}_3\cdot 6\text{H}_2\text{O}$ .

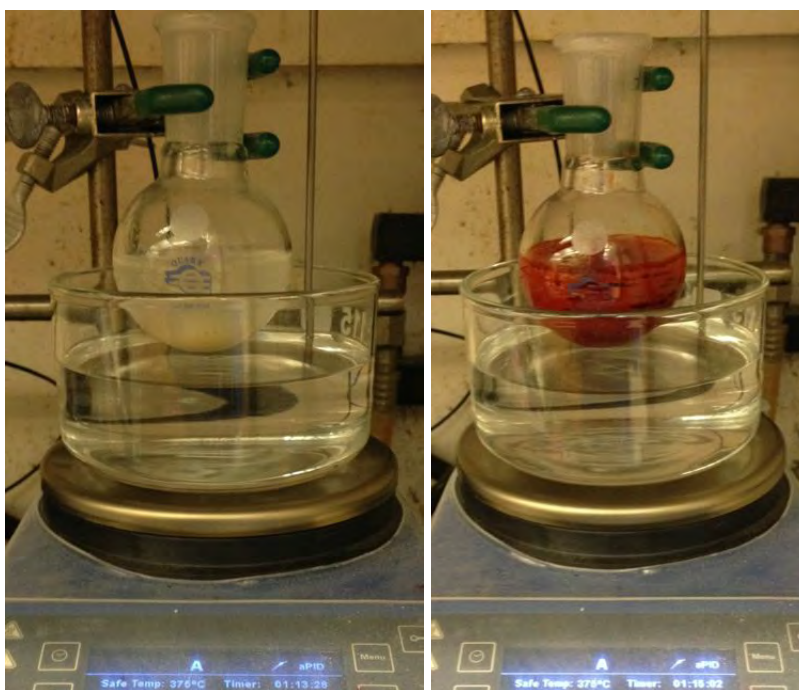

**Figure S3.** Setting up the synthesis of  $\text{Fe}(\text{dibm})_3$ . From left to right: biphasic mixture of  $\text{NaOAc}\cdot 3\text{H}_2\text{O}$  and 2,6-dimethylheptane-3,5-dione in aqueous EtOH, after addition of  $\text{FeCl}_3\cdot 6\text{H}_2\text{O}$ .



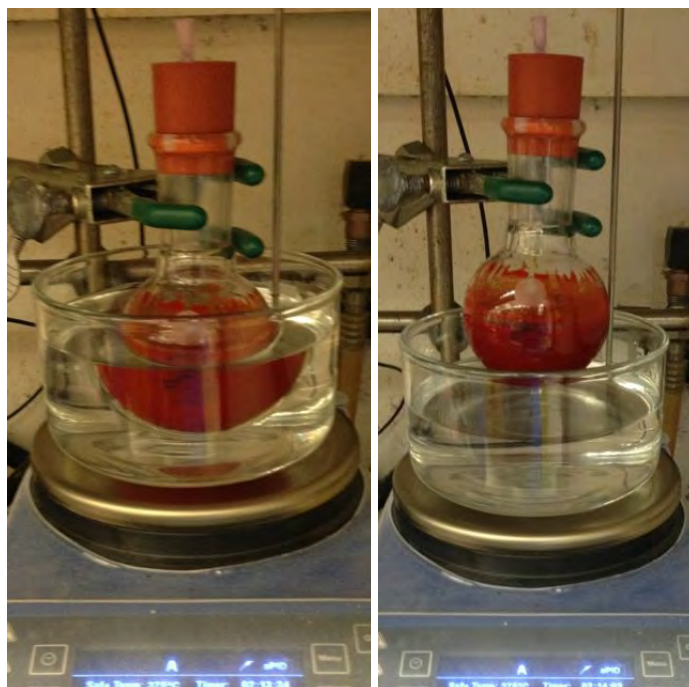

**Figure S4.** Synthesis of  $\text{Fe}(\text{dibm})_3$ . From left to right: heating the reaction mixture at  $60\text{ }^\circ\text{C}$ , cooling the reaction mixture to room temperature after heating at  $60\text{ }^\circ\text{C}$  for 1 h.

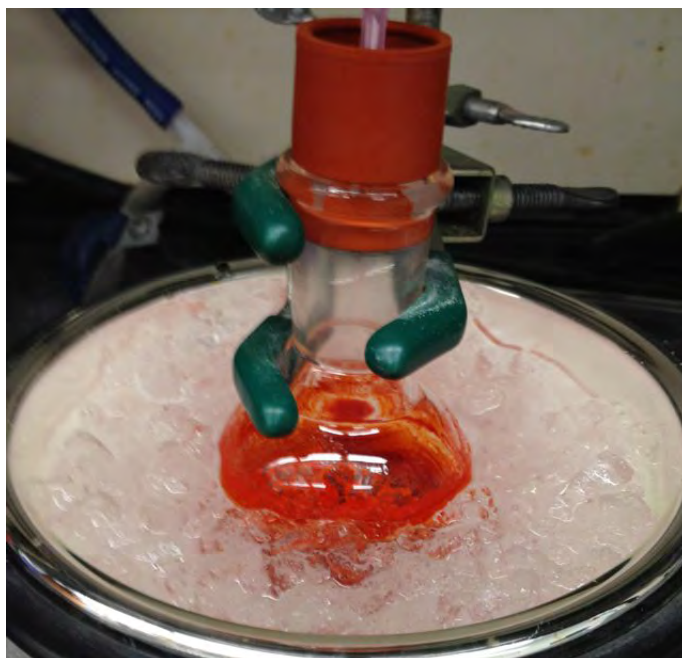

**Figure S5.** Cooling the slurry at  $0\text{ }^\circ\text{C}$ .

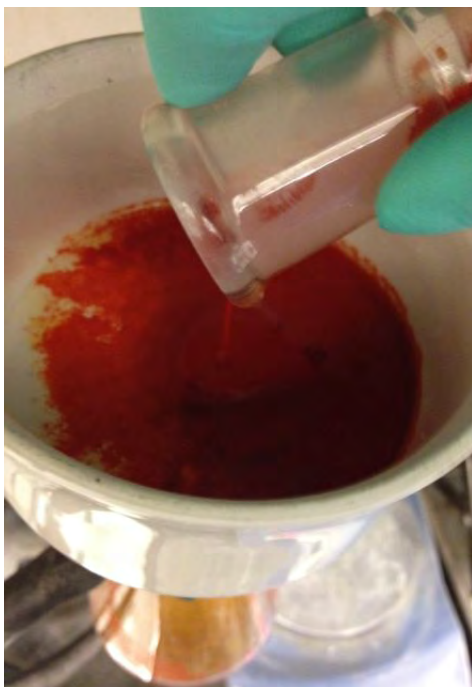

**Figure S6.** Filtering the slurry through a Büchner funnel.

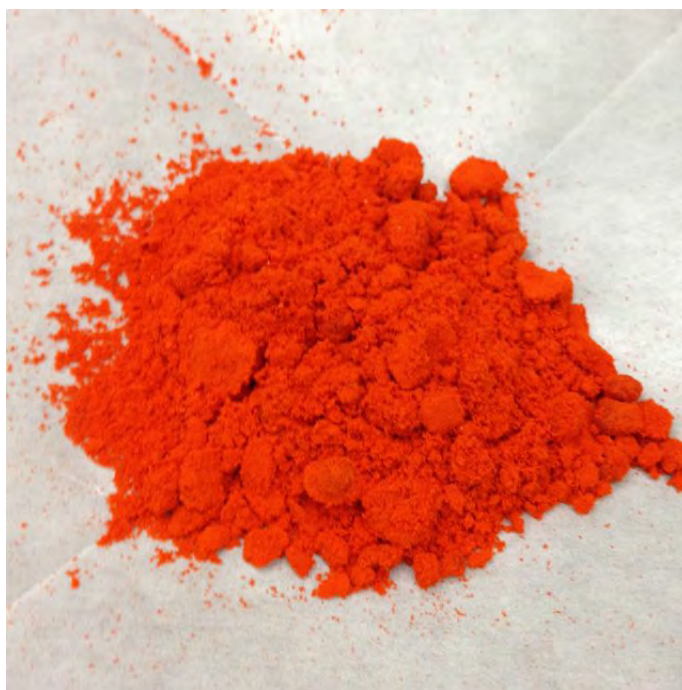

**Figure S7.** Crude  $\text{Fe(dibm)}_3$ .

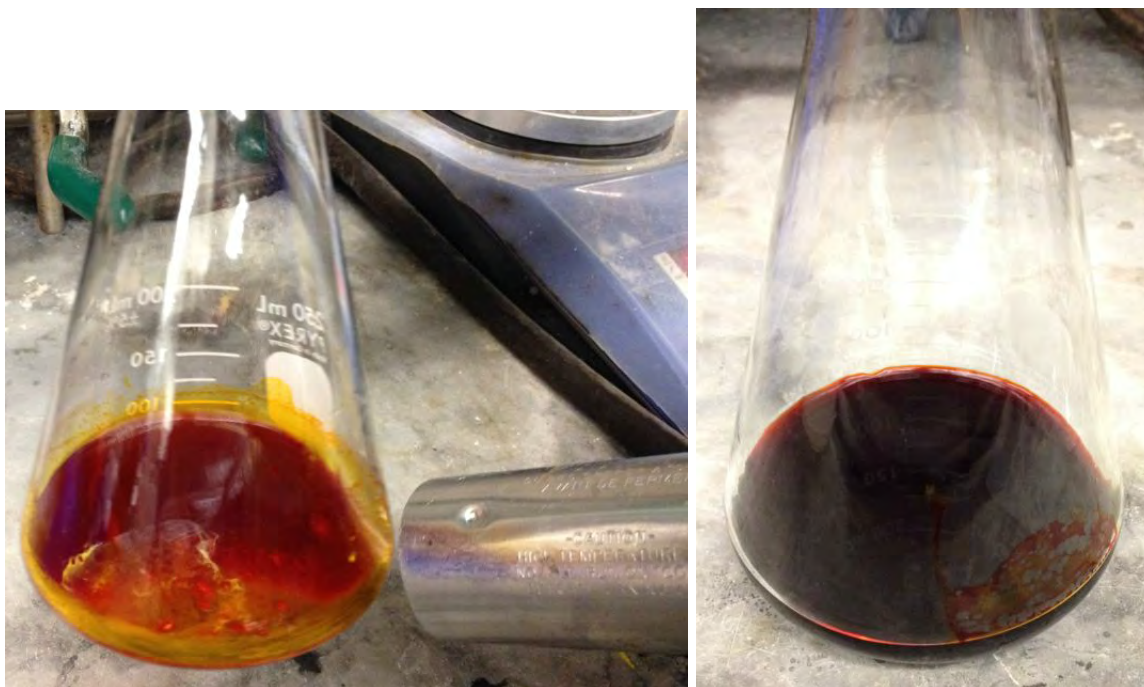

**Figure S8.** Recrystallization of  $\text{Fe}(\text{dibm})_3$  in an Erlenmeyer flask. From left to right: heating with a heat gun, dark red solution of fully dissolved  $\text{Fe}(\text{dibm})_3$ .

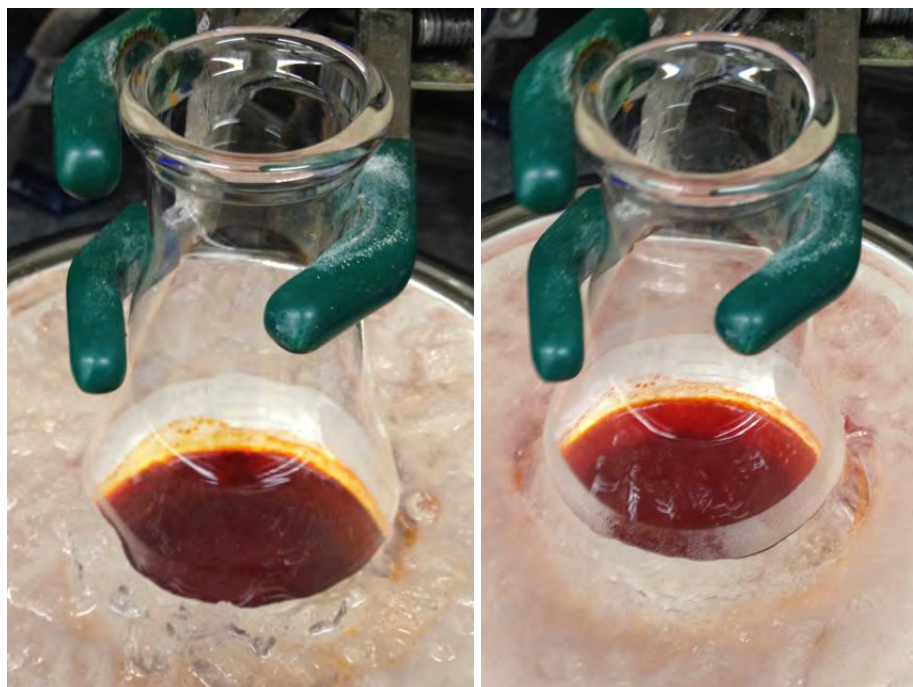

**Figure S9.** Cooling of the solution at  $0\text{ }^\circ\text{C}$ . From left to right: immediately upon cooling, after cooling ca. 1 h.



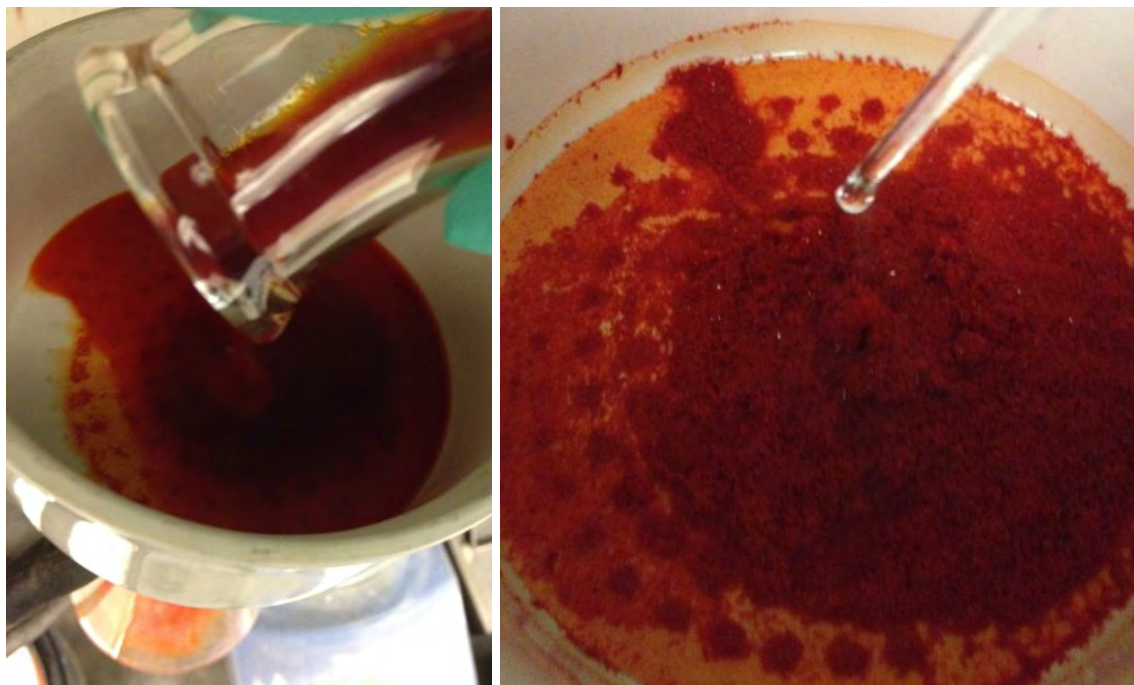

**Figure S10.** Collecting the recrystallized  $\text{Fe}(\text{dibm})_3$ . From left to right: filtering through a Büchner funnel, rinsing with aqueous EtOH pre-cooled to  $-78\text{ }^\circ\text{C}$ .

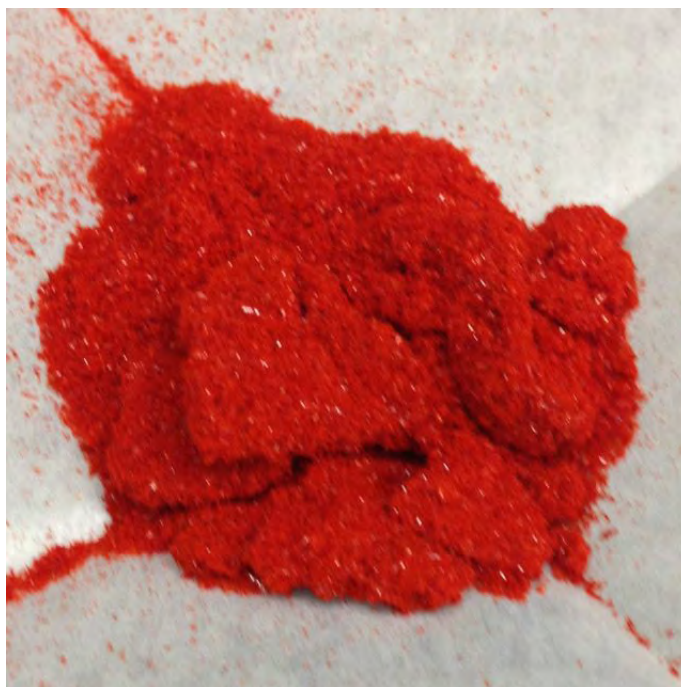

**Figure S11.** Recrystallized  $\text{Fe}(\text{dibm})_3$ .

### **General Procedure for the Olefin Cross-Coupling**

To a solution of donor olefin in EtOH or *n*-PrOH was added anhydrous Na<sub>2</sub>HPO<sub>4</sub>, Fe(dibm)<sub>3</sub> or Fe(acac)<sub>3</sub>, acceptor olefin, and PhSiH<sub>3</sub> [CAUTION: gas evolution (presumably H<sub>2</sub>) is occasionally observed upon addition of PhSiH<sub>3</sub>]. The resulting mixture was stirred at room temperature or heated in an oil bath preheated to 60 °C or 80 °C with stirring for the indicated time (typically until TLC analysis indicated the consumption of starting material). The reaction mixture was then cooled to room temperature and diluted with brine and EtOAc. The organic layer was separated and the aqueous layer was extracted with EtOAc. The organic layers were combined, washed with brine, dried over Na<sub>2</sub>SO<sub>4</sub>, filtered, and concentrated under reduced pressure. The resulting crude product was then purified on SiO<sub>2</sub> (preparative TLC or flash column chromatography) to furnish the coupled product.

## Photographic Guide for the Olefin Cross-Coupling

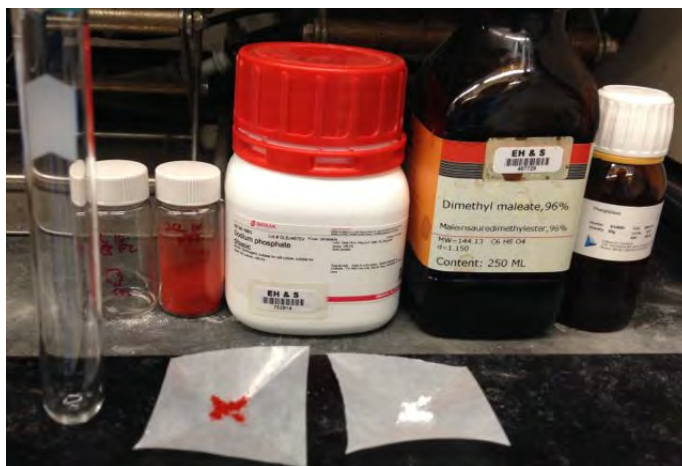

**Figure S12.** Reagents used in the olefin cross-coupling. From left to right: donor olefin, Fe(dibm)<sub>3</sub>, Na<sub>2</sub>HPO<sub>4</sub>, acceptor olefin, PhSiH<sub>3</sub>.

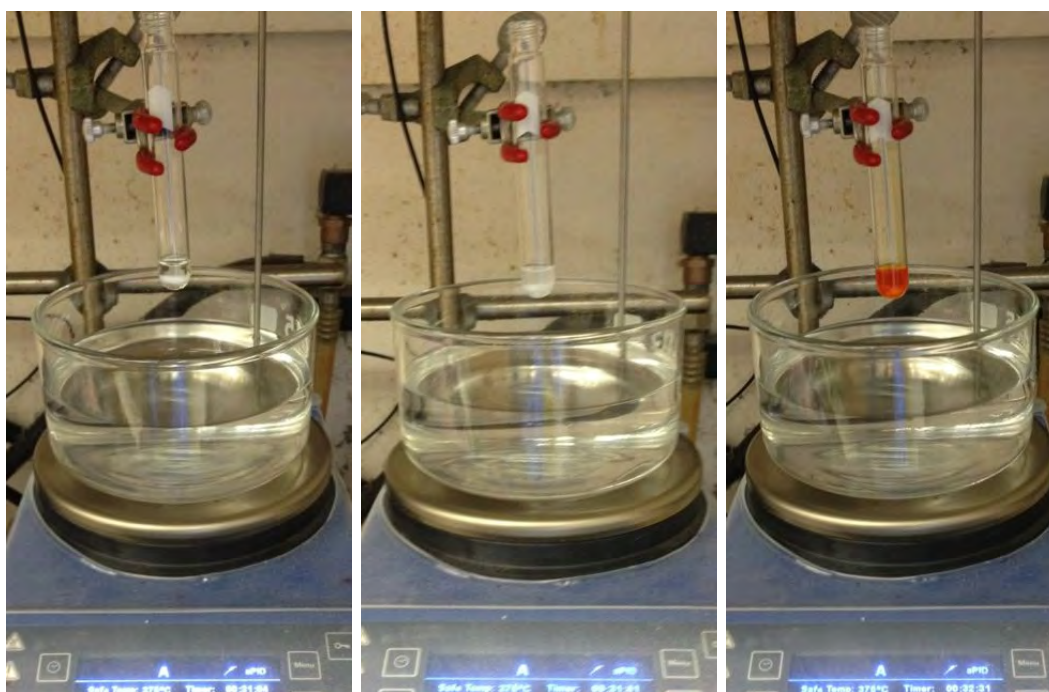

**Figure S13.** Addition of reagents. From left to right: donor olefin in EtOH, after addition of Na<sub>2</sub>HPO<sub>4</sub>, after addition of Fe(dibm)<sub>3</sub>.

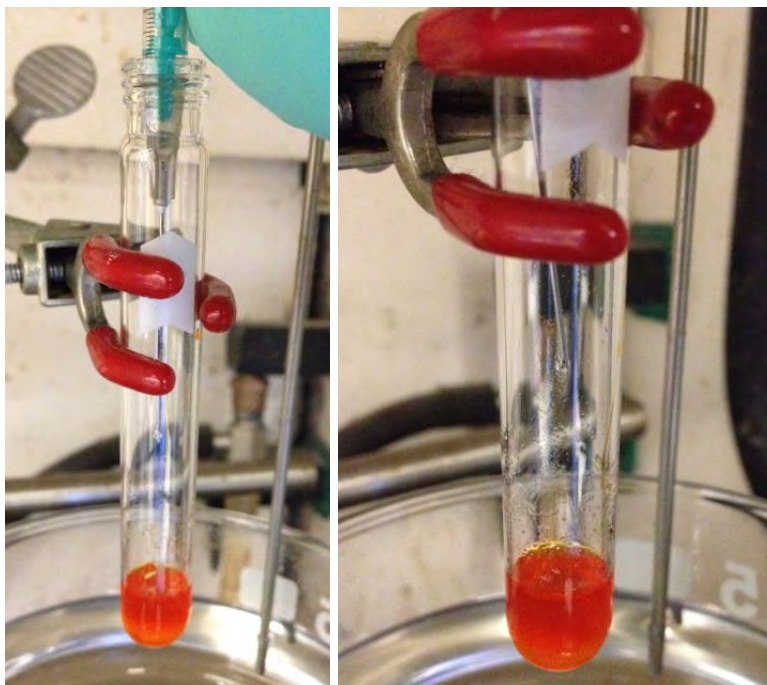

**Figure S14.** Addition of reagents, continued. From left to right: addition of acceptor olefin, addition of  $\text{PhSiH}_3$ .

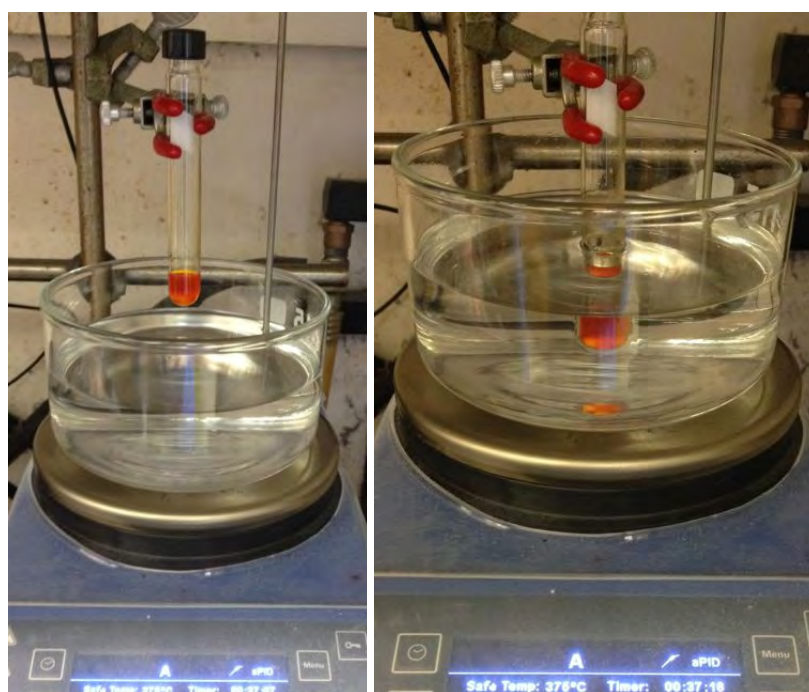

**Figure S15.** Setting up the olefin cross-coupling. From left to right: prior to heating at  $60\text{ }^\circ\text{C}$ , heating at  $60\text{ }^\circ\text{C}$ .



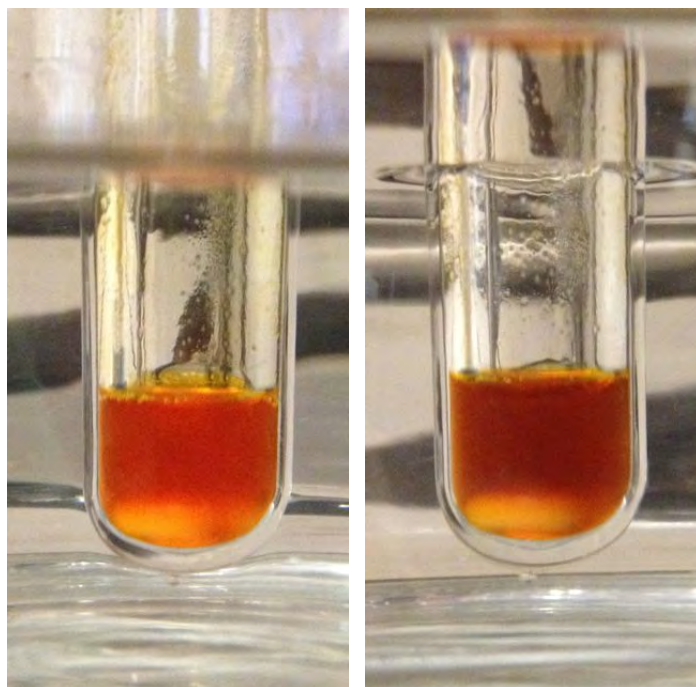

**Figure S16.** Close ups of reaction mixture while heating. From left to right: immediately upon heating at 60 °C, ca. 5 min after heating at 60 °C (note color change).

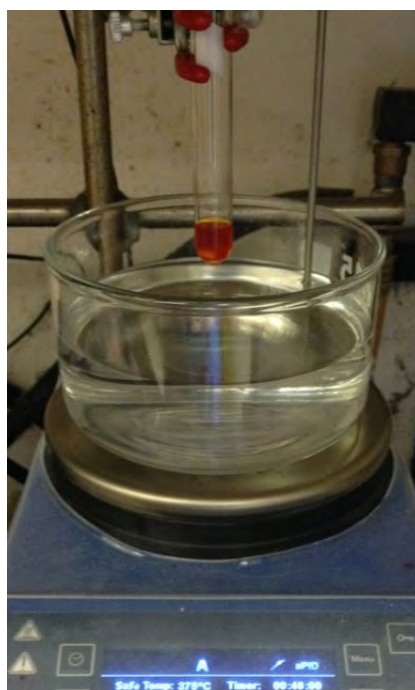

**Figure S17.** Cooling reaction mixture at rt.



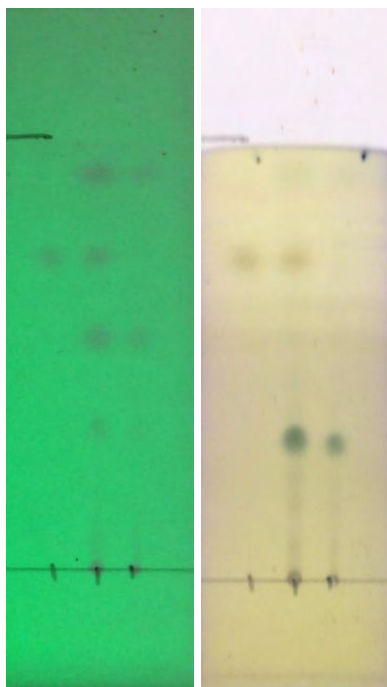

**Figure S18.** TLC of reaction mixture (7:3 hexanes:EtOAc). From left to right: visualized with shortwave UV light, visualized with vanillin.

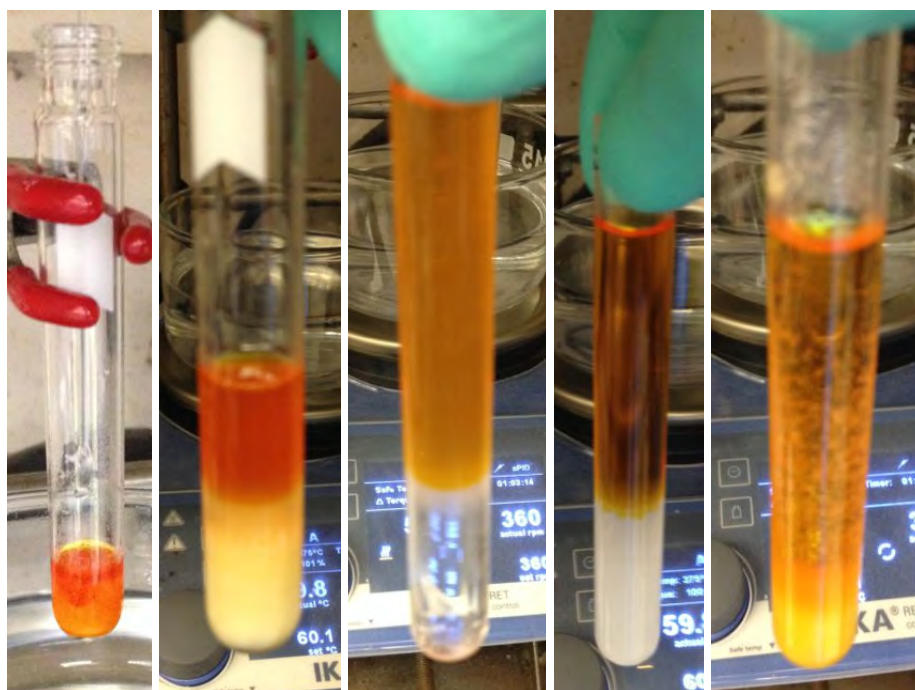

**Figure S19.** Work up of olefin cross-coupling. From left to right: addition of brine to reaction mixture, extraction with EtOAc, addition of brine to combined organic layers, phase separation after brine wash, drying over  $\text{Na}_2\text{SO}_4$ .

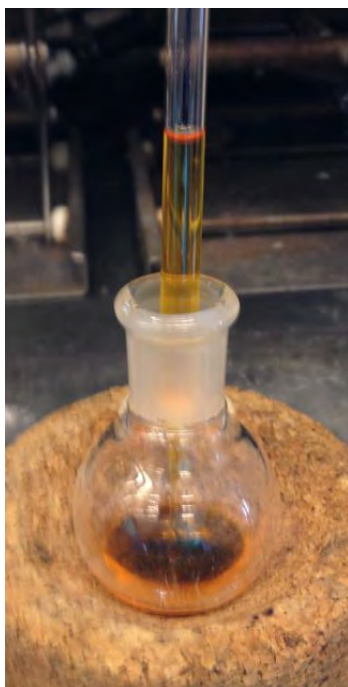

**Figure S20.** Filtering off the  $\text{Na}_2\text{SO}_4$ .

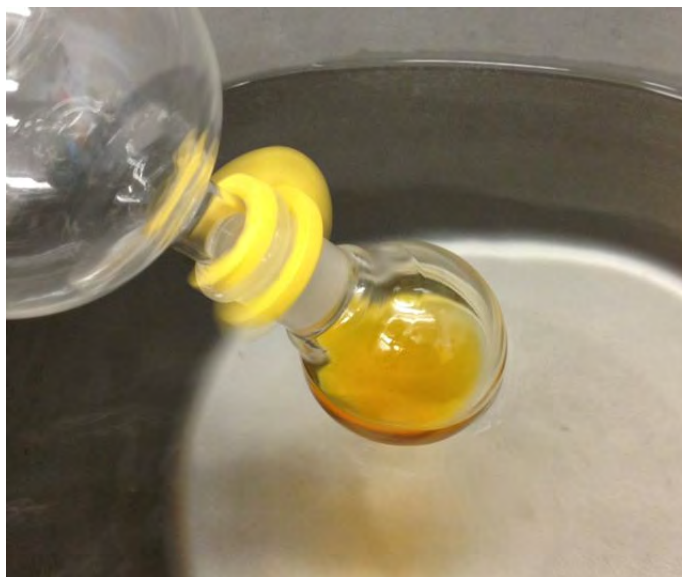

**Figure S21.** Concentrating under reduced pressure.

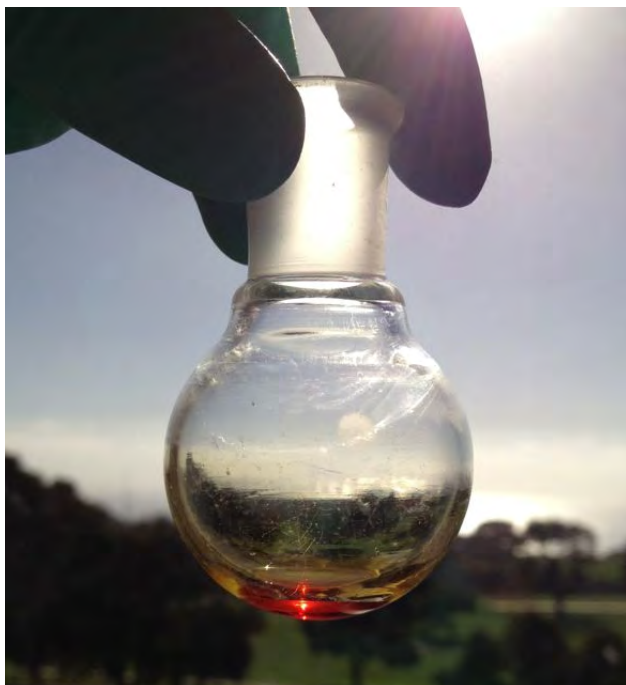

**Figure S22.** Crude coupled product.

## Experimental Procedures and Characterization Data for Products

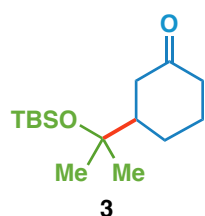

### 3-(2-((*tert*-Butyldimethylsilyloxy)propan-2-yl)cyclohexan-1-one (3).

Following the general procedure, a mixture of *tert*-butyldimethyl(prop-1-en-2-yloxy)silane<sup>5</sup> (51.7 mg, 300  $\mu$ mol, 3.0 equiv), cyclohex-2-enone (9.6 mg, 100  $\mu$ mol, 1.0 equiv), Na<sub>2</sub>HPO<sub>4</sub> (14.2 mg, 100  $\mu$ mol, 1.0 equiv), Fe(dibm)<sub>3</sub> (2.6 mg, 5.0  $\mu$ mol, 5 mol %), and PhSiH<sub>3</sub> (25.0  $\mu$ L, 200  $\mu$ mol, 2.0 equiv) in EtOH (0.50 mL) was heated at 60 °C with stirring for 1 h. Purification by flash column chromatography (SiO<sub>2</sub>, 10:1 hexanes:EtOAc) furnished silyl ether **3** as a pale yellow oil (21.9 mg, 78.1  $\mu$ mol, 78%).

**Physical State:** pale yellow oil.

**<sup>1</sup>H NMR** (600 MHz, CDCl<sub>3</sub>):  $\delta$  2.48 (dddd,  $J = 13.9, 4.1, 2.1, 2.1$  Hz, 1 H), 2.34 (dddd,  $J = 14.3, 4.2, 2.2, 2.2, 2.2$  Hz, 1 H), 2.25 – 2.19 (m, 2 H), 2.09 (dddd,  $J = 3.2, 3.2, 3.2, 6.1, 12.6$  Hz, 1 H), 1.97 (dddd,  $J = 13.0, 3.5, 3.5, 3.5, 1.8, 1.8$ , 1 H), 1.64 (dddd,  $J = 12.4, 12.4, 3.6, 3.6$  Hz, 1 H), 1.56 (dddd,  $J = 13.4, 13.4, 13.4, 3.9, 3.9$ , 1 H), 1.46 (dddd,  $J = 13.0, 13.0, 11.7, 3.3$  Hz, 1 H), 1.22 (s, 3 H), 1.18 (s, 3 H), 0.86 (s, 9 H), 0.08 (s, 3 H), and 0.07 (s, 3 H).

**<sup>13</sup>C NMR** (151 MHz, CDCl<sub>3</sub>):  $\delta$  213.4, 74.6, 50.8, 43.3, 41.5, 28.1, 26.0, 25.3, 19.3, 18.4, and – 2.0.

**HRMS ( $m/z$ ):** calcd for C<sub>15</sub>H<sub>31</sub>O<sub>2</sub>Si [M+H]<sup>+</sup>: 271.2088, found: 271.2087.

**IR (film)  $\nu_{\max}$ :** 2930, 2587, 2516, 1713, 1462, 1365, 1254, 1223, 1155, 1153, 1099, 1036, 1006, 939, 834, 772, and 671 cm<sup>-1</sup>.

**TLC:** R<sub>f</sub> = 0.55 (10:1 hexanes:EtOAc).

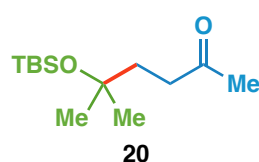

### 5-((*tert*-Butyldimethylsilyloxy)-5-methylhexan-2-one (20).

Following the general procedure, a mixture of *tert*-butyldimethyl(prop-1-en-2-yloxy)silane<sup>5</sup> (17.3 mg, 100  $\mu$ mol, 1.0 equiv), methyl vinyl ketone (24.9  $\mu$ L, 300  $\mu$ mol, 3.0 equiv), Na<sub>2</sub>HPO<sub>4</sub> (14.2 mg, 100  $\mu$ mol, 1.0 equiv), Fe(dibm)<sub>3</sub> (2.6 mg, 5.0  $\mu$ mol, 5 mol %), and PhSiH<sub>3</sub> (24.6  $\mu$ L, 200  $\mu$ mol, 2.0 equiv) in EtOH (0.50 mL) was heated at 60 °C with stirring for 1 h. Purification by flash column chromatography (SiO<sub>2</sub>, 97:3 hexanes:EtOAc) furnished silyl ether **20** as a colorless oil (16.8 mg, 68.8  $\mu$ mol, 69%).

**Physical State:** colorless oil

**<sup>1</sup>H NMR** (600 MHz, CDCl<sub>3</sub>): δ 2.54 (t, *J* = 7.8 Hz, 2 H), 2.16 (s, 3 H), 1.69 (t, *J* = 7.8 Hz, 2 H), 1.20 (s, 6 H), 0.85 (s, 9 H), and 0.07 (s, 6 H).

**<sup>13</sup>C NMR** (151 MHz, CDCl<sub>3</sub>): δ 209.8, 72.8, 39.1, 38.5, 30.1, 29.9, 26.0, 18.2, and -1.9.

**HRMS** (*m/z*) calcd for C<sub>13</sub>H<sub>29</sub>O<sub>2</sub>Si [M+H]<sup>+</sup>: 245.1931, found: 245.1928.

**IR** (film)  $\nu_{\max}$ : 2955, 2929, 2856, 1717, 1253, 1049, 834, 772, and 670 cm<sup>-1</sup>.

**TLC**: R<sub>f</sub> = 0.33 (97:3 hexanes:EtOAc)

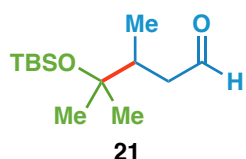

**4-((*tert*-butyl(dimethyl)silyloxy)-3,4-dimethylpentanal (**21**).** Following the general procedure, a mixture of *tert*-butyl(dimethyl)(prop-1-en-2-yloxy)silane<sup>5</sup> (17.2 mg, 100 μmol, 1.0 equiv), (*E*)-but-2-enal (25.0 μL, 300 μmol, 3.0 equiv), Na<sub>2</sub>HPO<sub>4</sub> (14.2 mg, 100 μmol, 1.0 equiv), Fe(dibm)<sub>3</sub> (2.6 mg, 5 μmol, 5 mol %), and PhSiH<sub>3</sub> (25.0 μL, 200 μmol, 2.0 equiv) in EtOH (0.50 mL) was heated at 60 °C with stirring for 1 h. Purification by flash column chromatography (SiO<sub>2</sub>, 20:1 hexanes:EtOAc) furnished silyl ether **21** as a pale yellow oil (9.7 mg, 39.6 μmol, 40%).

mg, 5 μmol, 5 mol %), and PhSiH<sub>3</sub> (25.0 μL, 200 μmol, 2.0 equiv) in EtOH (0.50 mL) was heated at 60 °C with stirring for 1 h. Purification by flash column chromatography (SiO<sub>2</sub>, 20:1 hexanes:EtOAc) furnished silyl ether **21** as a pale yellow oil (9.7 mg, 39.6 μmol, 40%).

**Physical State**: pale yellow oil.

**<sup>1</sup>H NMR** (600 MHz, CDCl<sub>3</sub>): δ 9.76 (dd, *J* = 3.0, 1.8 Hz, 1 H), 2.74 (dd, *J* = 16.2, 3.0 Hz, 1 H), 2.16 (ddd, *J* = 16.2, 9.2, 3.0 Hz, 1 H), 2.08 (dq, *J* = 10.2, 6.5, 3.5, 1 H), 1.23 (s, 3 H), 1.14 (s, 3 H), 0.92 (d, *J* = 7.2 Hz, 3 H), 0.85 (s, 9 H), 0.09 (s, 3 H) and 0.08 (s, 3 H).

**<sup>13</sup>C NMR** (151 MHz, CDCl<sub>3</sub>): δ 203.5, 75.4, 47.1, 40.0, 28.7, 26.0, 25.9, 18.3, 15.9, -1.9, and -2.0.

**GC/MS** (*m/z*): [M-Me]<sup>+</sup>: 229, [M-*t*-Bu]<sup>+</sup>: 187, [M-CH(CH<sub>3</sub>)CH<sub>2</sub>CHO]<sup>+</sup>: 173.

**IR** (film)  $\nu_{\max}$ : 2956, 2931, 2885, 2857, 1724, 1463, 1366, 1255, 1161, 1034, 910, and 834 cm<sup>-1</sup>.

**TLC**: R<sub>f</sub> = 0.45 (20:1 hexanes:EtOAc).

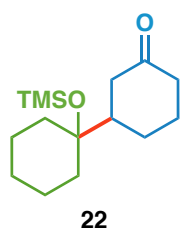

**1'-((Trimethylsilyloxy)-[1,1'-bi(cyclohexan)]-3-one (**22**).** A solution of PhSiH<sub>3</sub> (4.0 M in EtOH, 78.0 μL, 312 μmol, 2.0 equiv) was added slowly via syringe pump to a mixture of (cyclohex-1-en-1-yloxy)trimethylsilane<sup>6</sup> (79.2 mg, 468 μmol, 3.0 equiv), cyclohex-2-enone (15.0 mg, 156 μmol, 1.0 equiv), Na<sub>2</sub>HPO<sub>4</sub> (22.1 mg, 156 μmol, 1.0 equiv), and Fe(dibm)<sub>3</sub> (4.1 mg, 7.8 μmol, 5

mol %) in EtOH (0.78 mL) while heating at 60 °C with stirring for 1 h. After work up following the general procedure, purification by flash column chromatography (SiO<sub>2</sub>, 96:4 hexanes:EtOAc) furnished silyl ether **22** as a colorless oil (19.1 mg, 71.1 μmol, 46%).

**Physical State:** colorless oil.

**<sup>1</sup>H NMR** (600 MHz, CDCl<sub>3</sub>): δ 2.38 (dddd, *J* = 14.0, 4.1, 2.1, 2.1 Hz, 1 H), 2.36 – 2.32 (m, 1 H), 2.26 – 2.20 (m, 2 H), 2.10 (dddd, *J* = 16.4, 6.4, 3.4, 3.4 Hz, 1 H), 1.94 (dddd, *J* = 11.8, 11.8, 3.8, 3.8 Hz, 1 H), 1.90 – 1.84 (m, 1 H), 1.71 – 1.67 (m, 1 H), 1.62 – 1.52 (m, 4 H), 1.51 – 1.31 (m, 7 H), and 0.12 (s, 9 H).

**<sup>13</sup>C NMR** (151 MHz, C<sub>6</sub>D<sub>6</sub>): δ 209.8, 77.4, 42.6, 41.4, 36.0, 35.8, 30.2, 26.1, 25.3, 25.2, 22.9, 22.8, and 2.9.

**HRMS** (*m/z*) calcd for C<sub>15</sub>H<sub>29</sub>O<sub>2</sub>Si [M+H]<sup>+</sup>: 269.1931, found: 269.1933.

**IR** (film) ν<sub>max</sub>: 2933, 2862, 1711, 1450, 1249, 1059, 1005, 899, 833, and 751 cm<sup>-1</sup>.

**TLC:** R<sub>f</sub> = 0.41 (9:1 hexanes:EtOAc)

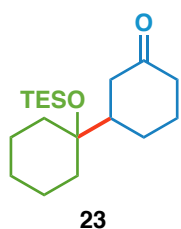

**1'-((Triethylsilyloxy)-[1,1'-bi(cyclohexan)]-3-one (23).** A solution of PhSiH<sub>3</sub> (4.0 M in EtOH, 78.0 μL, 312 μmol, 2.0 equiv) was added slowly via syringe pump to a mixture of (cyclohex-1-en-1-yloxy)triethylsilane<sup>7</sup> (99.4 mg, 468 μmol, 3.0 equiv), cyclohex-2-enone (15.0 mg, 156 μmol, 1.0 equiv), Na<sub>2</sub>HPO<sub>4</sub> (22.1 mg, 156 μmol, 1.0 equiv), and Fe(dibm)<sub>3</sub> (4.1 mg, 7.8 μmol, 5 mol %) in EtOH

(0.78 mL) while heating at 60 °C with stirring for 1 h. After work up following the general procedure, purification by flash column chromatography (SiO<sub>2</sub>, 95:5 hexanes:EtOAc) furnished silyl ether **23** as a colorless oil (15.9 mg, 51.2 μmol, 33%).

**Physical State:** colorless oil.

**<sup>1</sup>H NMR** (600 MHz, CDCl<sub>3</sub>): δ 2.35 – 2.30 (m, 3 H), 2.25 – 2.20 (m, 1 H), 2.12 – 2.10 (m, 1 H), 2.05 – 2.01 (m, 1 H), 1.88 – 1.83 (m, 2 H), 1.73 – 1.68 (m, 1 H), 1.59 – 1.50 (m, 5 H), 1.41 – 1.20 (m, 5 H), 0.96 (t, *J* = 7.8 Hz, 9 H), and 0.60 (q, *J* = 7.8 Hz, 6 H).

**<sup>13</sup>C NMR** (151 MHz, CDCl<sub>3</sub>): δ 214.0, 76.4, 42.9, 42.2, 41.5, 37.0, 36.5, 25.8, 25.4, 24.6, 23.2, 23.1, 7.5, and 7.2.

**HRMS** (*m/z*): calcd for C<sub>18</sub>H<sub>35</sub>O<sub>2</sub>Si [M+H]<sup>+</sup>: 311.2401, found: 311.2402.

**IR** (film) ν<sub>max</sub>: 2936, 2872, 1712, 1114, 721, and 671 cm<sup>-1</sup>.

TLC:  $R_f$  = 0.44 (9:1 hexanes:EtOAc)

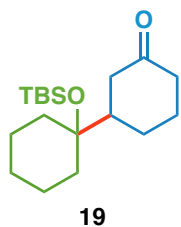

**1'-((*tert*-Butyldimethylsilyloxy)-[1,1'-bi(cyclohexan)]-3-one (19).** A solution of  $\text{PhSiH}_3$  (4.0 M in EtOH, 78.0  $\mu\text{L}$ , 312  $\mu\text{mol}$ , 2.0 equiv) was added slowly via syringe pump to a mixture of *tert*-butyl(cyclohex-1-en-1-yloxy)dimethylsilane<sup>8</sup> (99.4 mg, 468  $\mu\text{mol}$ , 3.0 equiv), cyclohex-2-enone (15.0 mg, 156  $\mu\text{mol}$ , 1.0 equiv),  $\text{Na}_2\text{HPO}_4$  (22.1 mg, 156  $\mu\text{mol}$ , 1.0 equiv), and  $\text{Fe}(\text{dibm})_3$  (4.1 mg, 7.8

$\mu\text{mol}$ , 5 mol %) in EtOH (0.78 mL) while heating at 60 °C with stirring for 1 h. After work up following the general procedure, purification by flash column chromatography ( $\text{SiO}_2$ , 96:4 hexanes:EtOAc) furnished silyl ether **19** as a white solid (17.8 mg, 57.3  $\mu\text{mol}$ , 37%).

**Physical State:** white solid.

**Melting Point:** 59.0–60.0 °C.

**$^1\text{H}$  NMR** (600 MHz,  $\text{CDCl}_3$ ):  $\delta$  2.38 – 2.30 (m, 3 H), 2.21 (ddd,  $J$  = 13.6, 6.8, 6.8 Hz, 1 H), 2.12 – 2.03 (m, 2 H), 1.89 – 1.85 (m, 2 H), 1.74 – 1.72 (m, 1 H), 1.65 – 1.50 (m, 5 H), 1.39 (ddd,  $J$  = 12.4, 12.4, 3.5 Hz, 1 H), 1.36 – 1.20 (m, 4 H), 0.87 (s, 9 H), 0.10 (s, 3 H), and 0.08 (s, 3H).

**$^{13}\text{C}$  NMR** (151 MHz,  $\text{CDCl}_3$ ):  $\delta$  213.9, 76.6, 42.7, 42.1, 41.5, 36.8, 36.2, 26.1, 25.7, 25.4, 24.5, 23.1, 23.0, 18.7, –1.6, and –1.6.

**HRMS** ( $m/z$ ) calcd for  $\text{C}_{18}\text{H}_{35}\text{O}_2\text{Si}$  [ $\text{M}+\text{H}$ ]<sup>+</sup>: 311.2401, found: 311.2402.

**IR** (film)  $\nu_{\text{max}}$ : 2929, 2856, 1711, 1460, 1252, 1113, 1091, 1002, 831, 770, and 668  $\text{cm}^{-1}$ .

TLC:  $R_f$  = 0.44 (9:1 hexanes:EtOAc)

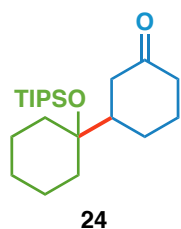

**1'-((Triisopropylsilyloxy)-[1,1'-bi(cyclohexan)]-3-one (24).** A solution of  $\text{PhSiH}_3$  (4.0 M in EtOH, 78.0  $\mu\text{L}$ , 312  $\mu\text{mol}$ , 2.0 equiv) was added slowly via syringe pump to a mixture of (cyclohex-1-en-1-yloxy)triisopropylsilane<sup>9</sup> (119.1 mg, 468  $\mu\text{mol}$ , 3.0 equiv), cyclohex-2-enone (15.0 mg, 156  $\mu\text{mol}$ , 1.0 equiv),  $\text{Na}_2\text{HPO}_4$  (22.1 mg, 156  $\mu\text{mol}$ , 1.0 equiv), and  $\text{Fe}(\text{dibm})_3$  (4.1 mg, 7.8  $\mu\text{mol}$ , 5

mol %) in EtOH (0.78 mL) while heating at 60 °C with stirring for 1 h. After work up following the general procedure, purification by flash column chromatography ( $\text{SiO}_2$ , 95:5 hexanes:EtOAc) followed by preparative TLC ( $\text{SiO}_2$ , 95:5 hexanes:EtOAc) furnished silyl ether **24** as a colorless oil (4.3 mg, 13.3  $\mu\text{mol}$ , 9%).

**Physical State:** colorless oil.



**<sup>1</sup>H NMR** (600 MHz, CDCl<sub>3</sub>): δ 2.47 (dd, *J* = 13.7, 13.7 Hz, 1 H), 2.38 – 2.33 (m, 2 H), 2.23 (ddd, *J* = 13.7, 13.7, 6.0 Hz, 1 H), 2.16 (dddd, *J* = 12.1, 12.1, 3.8, 3.8 Hz, 1 H), 2.13 – 2.10 (m, 1 H), 2.06 – 2.02 (m, 1 H), 1.87 – 1.84 (m, 2 H), 1.59 – 1.57 (m, 4 H), 1.41 (ddd, *J* = 13.1, 13.1, 3.7 Hz, 1 H), 1.33 (ddd, *J* = 12.8, 12.8, 3.2 Hz, 1 H), 1.29 – 1.22 (m, 3 H), 1.21 – 1.13 (m, 1 H), and 1.10 – 1.04 (m, 21 H).

**<sup>13</sup>C NMR** (151 MHz, CDCl<sub>3</sub>): δ 214.2, 76.4, 42.1, 41.6, 41.5, 37.5, 37.0, 25.6, 25.6, 24.4, 23.5, 23.5, 18.7, and 13.9.

**HRMS** (*m/z*) calcd for C<sub>21</sub>H<sub>41</sub>O<sub>2</sub>Si [M+H]<sup>+</sup>: 353.2870, found: 353.2868.

**IR** (film) ν<sub>max</sub>: 2939, 2865, 1713, 1459, 1115, 1095, 1067, 1007, 883, and 672 cm<sup>-1</sup>.

**TLC**: R<sub>f</sub> = 0.44 (9:1 hexanes:EtOAc).

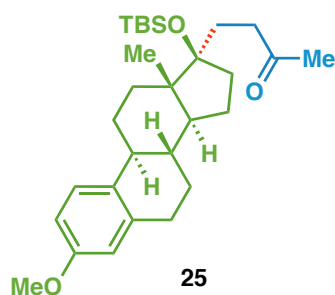

**4-((8*R*,9*S*,13*S*,14*S*,17*R*)-17-((*tert*-Butyldimethylsilyl)oxy)-3-methoxy-13-methyl-7,8,9,11,12,13,14,15,16,17-decahydro-6*H*-cyclopenta[*a*]phenanthren-17-yl)butan-2-one (25)**. Following the general procedure using THF as a cosolvent, a mixture of *tert*-butyl(((8*R*,9*S*,13*S*,14*S*)-3-methoxy-13-methyl-7,8,9,11,12,13,14,15-octahydro-6*H*-cyclopenta[*a*]phenanthren-17-yl)oxy)dimethylsilane<sup>10</sup>

(19.9 mg, 50.0 μmol, 1.0 equiv), methyl vinyl ketone (24.8 μL, 300 μmol, 6.0 equiv), Na<sub>2</sub>HPO<sub>4</sub> (7.1 mg, 50.0 μmol, 1.0 equiv), Fe(dibm)<sub>3</sub> (1.3 mg, 2.5 μmol, 5 mol %), and PhSiH<sub>3</sub> (36.9 μL, 300 μmol, 6.0 equiv) in EtOH (0.12 mL) and THF (0.12 mL) was heated at 60 °C with stirring for 1 h. Purification by flash column chromatography (SiO<sub>2</sub>, 50:1→30:1 hexanes:EtOAc) furnished estrone derivative **25** as a white solid (10.0 mg, 21.3 μmol, 43%).

**Physical State**: white solid.

**Melting Point**: 72.2–74.9 °C.

**<sup>1</sup>H NMR** (600 MHz, CDCl<sub>3</sub>): δ 7.20 (d, *J* = 8.4 Hz, 1 H), 6.71 (dd, *J* = 8.4, 3.0 Hz, 1 H), 6.62 (d, *J* = 3.0 Hz, 1 H), 3.78 (s, 3 H), 2.86 – 2.83 (m, 2 H), 2.64 – 2.59 (m, 2 H), 2.30 – 2.28 (m, 1 H), 2.17 (s, 3 H), 0.90 (s, 9 H), 0.83 (s, 3 H), 0.11 (s, 3 H), and 0.10 (s, 3 H).

**<sup>13</sup>C NMR** (151 MHz, CDCl<sub>3</sub>): δ 209.6, 157.6, 138.2, 132.9, 126.4, 113.9, 111.6, 86.1, 55.4, 48.6, 48.2, 43.9, 40.0, 39.9, 35.5, 32.5, 32.2, 30.3, 30.0, 27.7, 26.6, 26.3, 23.5, 18.9, 15.5, -1.3, and -1.7.

**HRMS** (*m/z*): calcd for C<sub>29</sub>H<sub>47</sub>O<sub>3</sub>Si [M+Na]<sup>+</sup>: 493.3108, found: 493.3109.



**IR (film)  $\nu_{\max}$ :** 2929, 2855, 1714, 1500, 1252, 1059, 833 and 735  $\text{cm}^{-1}$ .

**$[\alpha]_{20}^D$ :** +22.0 ( $c = 0.50$ ,  $\text{CHCl}_3$ ).

**TLC:**  $R_f = 0.48$  (10:1 hexanes:EtOAc).

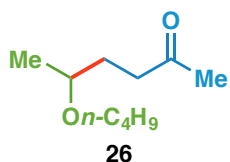

**5-Butoxyhexan-2-one (26).** Following the general procedure, a mixture of butyl vinyl ether (54.6  $\mu\text{L}$ , 600  $\mu\text{mol}$ , 3.0 equiv), methyl vinyl ketone (16.5  $\mu\text{L}$ , 200  $\mu\text{mol}$ , 1.0 equiv),  $\text{Na}_2\text{HPO}_4$  (28.4 mg, 200  $\mu\text{mol}$ , 1.0 equiv),  $\text{Fe}(\text{dibm})_3$  (5.2 mg, 10  $\mu\text{mol}$ , 5 mol %), and  $\text{PhSiH}_3$  (49.2  $\mu\text{L}$ , 400  $\mu\text{mol}$ , 2.0

equiv) in EtOH (1.0 mL) was heated at 60  $^\circ\text{C}$  with stirring for 1 h. Purification by flash column chromatography ( $\text{SiO}_2$ , 50:1 $\rightarrow$ 20:1 hexanes:EtOAc) furnished ether **26** as a colorless oil (17.6 mg, 102  $\mu\text{mol}$ , 51%).

**Physical State:** colorless oil.

**$^1\text{H NMR}$**  (600 MHz,  $\text{CDCl}_3$ ):  $\delta$  3.46 (ddd,  $J = 9.0, 6.0, 6.0$  Hz, 1 H), 3.37 – 3.34 (m, 1 H), 3.26 (ddd,  $J = 9.6, 6.6, 6.6$  Hz, 1 H), 2.54 – 2.46 (m, 2 H), 2.13 (s, 3 H), 1.75 – 1.73 (m, 1 H), 1.71 – 1.64 (m, 1 H), 1.53 – 1.46 (m, 2 H), 1.37 – 1.32 (m, 2 H), 1.11 (d,  $J = 6.0$  Hz, 3 H), and 0.90 (t,  $J = 7.2$  Hz, 3 H).

**$^{13}\text{C NMR}$**  (151 MHz,  $\text{CDCl}_3$ ):  $\delta$  209.2, 74.3, 68.3, 39.8, 32.3, 30.7, 30.1, 19.8, 19.5, and 14.0.

**HRMS ( $m/z$ ):** calcd for  $\text{C}_{10}\text{H}_{21}\text{O}_2$   $[\text{M}+\text{H}]^+$ : 173.1536, found: 173.1546.

**IR (film)  $\nu_{\max}$ :** 2960, 2931, 2869, 1716, 1357, 1134, and 1094  $\text{cm}^{-1}$ .

**TLC:**  $R_f = 0.21$  (10:1 hexanes:EtOAc).

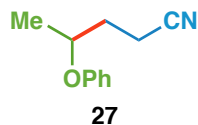

**4-Phenoxy-1-pentanitrile (27).** Following the general procedure, a mixture of phenyl vinyl ether (36.0 mg, 300  $\mu\text{mol}$ , 3.0 equiv), acrylonitrile (6.58  $\mu\text{L}$ , 100  $\mu\text{mol}$ , 1.0 equiv),  $\text{Na}_2\text{HPO}_4$  (14.2 mg, 100  $\mu\text{mol}$ , 1.0 equiv),  $\text{Fe}(\text{dibm})_3$  (2.6 mg, 5.0  $\mu\text{mol}$ , 5 mol %), and  $\text{PhSiH}_3$  (25.0  $\mu\text{L}$ , 200  $\mu\text{mol}$ , 2.0 equiv) in EtOH (0.50 mL) was

heated at 60  $^\circ\text{C}$  with stirring for 1 h. Purification by flash column chromatography ( $\text{SiO}_2$ , 10:1 hexanes:EtOAc) furnished ether **27** as a pale yellow oil (10.4 mg, 59.3  $\mu\text{mol}$ , 59%).

**Physical State:** pale yellow oil.

**$^1\text{H NMR}$**  (600 MHz,  $\text{CDCl}_3$ ):  $\delta$  7.31 – 7.27 (m, 2 H), 6.97 (dddd,  $J = 7.3, 7.3, 1.0, 1.0$  Hz, 1 H), 6.91 – 6.90 (m, 2 H), 4.49 (dq,  $J = 4.4, 6.1, 7.9$  Hz, 1 H), 2.54 (dd,  $J = 7.2, 7.2$  Hz, 2 H), 2.06 – 1.97 (m, 2 H), and 1.33 (d,  $J = 6.1$  Hz, 3 H).

$^{13}\text{C}$  NMR (151 MHz,  $\text{CDCl}_3$ ):  $\delta$  157.5, 129.8, 121.5, 119.7, 116.2, 71.8, 32.5, 19.5, and 13.8.

HRMS ( $m/z$ ): calcd for  $\text{C}_{11}\text{H}_{14}\text{NO}$   $[\text{M}+\text{H}]^+$ : 176.1070, found: 176.1074.

IR (film)  $\nu_{\text{max}}$ : 3017, 2977, 2935, 2249, 2021, 1944, 1596, 1491, 1380, 1292, 1237, 1173, 1136, 1083, 1026, 958, 911, and  $753\text{ cm}^{-1}$ .

TLC:  $R_f = 0.20$  (10:1 hexanes:EtOAc).

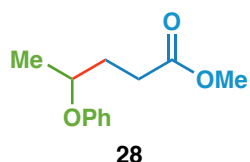

**Methyl 4-phenoxybutanoate (28).** Following the general procedure, a mixture of phenyl vinyl ether (36.0 mg, 300  $\mu\text{mol}$ , 3.0 equiv), methyl acrylate (9.00  $\mu\text{L}$ , 100  $\mu\text{mol}$ , 1.0 equiv),  $\text{Na}_2\text{HPO}_4$  (14.2 mg, 100  $\mu\text{mol}$ , 1.0 equiv),  $\text{Fe}(\text{dibm})_3$  (2.6 mg, 5.0  $\mu\text{mol}$ , 5 mol %), and  $\text{PhSiH}_3$  (25.0  $\mu\text{L}$ , 200  $\mu\text{mol}$ , 2.0 equiv) in EtOH (0.50 mL) was heated at 60  $^\circ\text{C}$  with stirring for 1 h. Purification by flash column chromatography ( $\text{SiO}_2$ , 10:1 hexanes:EtOAc) furnished ether **28** as a pale yellow oil (12.1 mg, 58.1  $\mu\text{mol}$ , 58%).

**Physical State:** pale yellow oil.

$^1\text{H}$  NMR (600 MHz,  $\text{CDCl}_3$ ):  $\delta$  7.27 – 7.25 (m, 2 H), 6.92 (dddd,  $J = 7.4, 7.4, 1.0, 1.0$  Hz, 1 H), 6.88 – 6.66 (m, 2 H), 4.41 (dq,  $J = 4.7, 6.0, 7.5$  Hz, 1 H), 3.65 (s, 3 H), 2.53 – 2.42 (m, 2 H), 2.04 – 1.93 (m, 2 H), and 1.30 (d,  $J = 6.1$  Hz, 3 H).

$^{13}\text{C}$  NMR (151 MHz,  $\text{CDCl}_3$ ):  $\delta$  174.1, 158.0, 129.6, 120.9, 116.0, 72.7, 51.7, 31.7, 30.2, and 19.7.

HRMS ( $m/z$ ): calcd for  $\text{C}_{12}\text{H}_{17}\text{O}_3$   $[\text{M}+\text{H}]^+$ : 209.1172, found: 209.1169.

IR (film)  $\nu_{\text{max}}$ : 2796, 1735, 1598, 1493, 1438, 1240, 1172, 1133, 1084, 753 and  $693\text{ cm}^{-1}$ .

TLC:  $R_f = 0.35$  (10:1 hexanes:EtOAc).

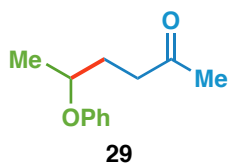

**5-Phenoxy-2-hexanone (29).** Following the general procedure, a mixture of phenyl vinyl ether (36.0 mg, 300  $\mu\text{mol}$ , 3.0 equiv), methyl vinyl ketone (8.11  $\mu\text{L}$ , 100  $\mu\text{mol}$ , 1.0 equiv),  $\text{Na}_2\text{HPO}_4$  (14.2 mg, 100  $\mu\text{mol}$ , 1.0 equiv),  $\text{Fe}(\text{dibm})_3$  (2.6 mg, 5.0  $\mu\text{mol}$ , 5 mol %), and  $\text{PhSiH}_3$  (25.0  $\mu\text{L}$ , 200  $\mu\text{mol}$ , 2.0 equiv) in EtOH (0.50 mL) was heated at 60  $^\circ\text{C}$  with stirring for 1 h. Purification by flash column chromatography ( $\text{SiO}_2$ , 5:1 hexanes:EtOAc) furnished ether **29** as a pale yellow oil (5.9 mg, 30.6  $\mu\text{mol}$ , 31%).

**Physical State:** pale yellow oil.

**<sup>1</sup>H NMR** (600 MHz, CDCl<sub>3</sub>): δ 7.28 – 7.25 (m, 2 H), 6.92 (dd, *J* = 7.3, 7.3 Hz, 1 H), 6.87 (d, *J* = 8.0 Hz, 2 H), 4.40 (dq, *J* = 6.1, 6.1, 6.1 Hz, 1 H), 2.66 – 2.55 (m, 2 H), 2.13 (s, 3 H), 1.98 – 1.89 (m, 2 H), and 1.29 (d, *J* = 6.1 Hz, 3 H).

**<sup>13</sup>C NMR** (151 MHz, CDCl<sub>3</sub>): δ 208.7, 158.1, 134.3, 129.7, 127.8, 120.8, 115.9, 72.8, 39.6, 30.6, 30.2, and 19.9.

**HRMS** (*m/z*): calcd for C<sub>12</sub>H<sub>17</sub>O<sub>2</sub> [M+H]<sup>+</sup>: 193.1223, found: 193.1226.

**IR** (film) *v*<sub>max</sub>: 2930, 1716, 1493, 1240, 1132, 911, 751, 670, and 490 cm<sup>-1</sup>.

**TLC**: R<sub>f</sub> = 0.40 (10:1 hexanes:EtOAc).

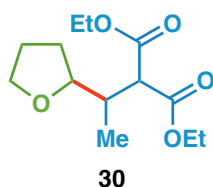

**30**

**Diethyl 2-(1-(tetrahydrofuran-2-yl)ethyl)malonate (30).** Following the general procedure, a mixture of 2,3-dihydrofuran (14.0 mg, 200 μmol, 1.0 equiv), diethyl ethylidenemalonate (109.6 μL, 600 μmol, 3.0 equiv), Na<sub>2</sub>HPO<sub>4</sub> (28.4 mg, 200 μmol, 1.0 equiv), Fe(dibm)<sub>3</sub> (5.2 mg, 10 μmol, 5 mol %), and PhSiH<sub>3</sub> (49.2 μL, 400 μmol, 2.0 equiv) in EtOH (1.0 mL) was heated at 60 °C with stirring for 1 h. Purification by flash column chromatography (SiO<sub>2</sub>, 20:1→10:1 hexanes:EtOAc) furnished a 1:1.2 diastereomeric mixture of ethers **30** as a colorless oil (27.9 mg, 108.1 μmol, 54%).

Spectroscopic data was identical to that reported in the literature.<sup>11</sup>

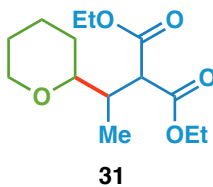

**31**

**Diethyl 2-(1-(tetrahydro-2H-pyran-2-yl)ethyl)malonate (31).** Following the general procedure, a mixture of 3,4-dihydro-2H-pyran (16.8 mg, 200 μmol, 1.0 equiv), diethyl ethylidenemalonate (110 μL, 600 μmol, 3.0 equiv), Na<sub>2</sub>HPO<sub>4</sub> (28.4 mg, 200 μmol, 1.0 equiv), Fe(dibm)<sub>3</sub> (5.2 mg, 10 μmol, 5 mol %), and PhSiH<sub>3</sub> (49.2 μL, 400 μmol, 2.0 equiv) in EtOH (1.0 mL) was heated at 60 °C with stirring for 1 h. Purification by flash column chromatography (SiO<sub>2</sub>, 50:1→20:1 hexanes:EtOAc) furnished a 1:1.8 diastereomeric mixture of ethers **31** as a colorless oil (41.1 mg, 15.1 μmol, 76%).

Spectroscopic data was identical to that reported in the literature.<sup>11</sup>

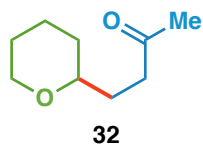

**4-(Tetrahydro-2H-pyran-2-yl)butan-2-one (32).** Following the general procedure, a mixture of 3,4-dihydro-2H-pyran (54.6  $\mu\text{L}$ , 600  $\mu\text{mol}$ , 3.0 equiv), methyl vinyl ketone (16.5  $\mu\text{L}$ , 200  $\mu\text{mol}$ , 1.0 equiv),  $\text{Na}_2\text{HPO}_4$  (28.4 mg, 200  $\mu\text{mol}$ , 1.0 equiv),  $\text{Fe}(\text{dibm})_3$  (5.2 mg, 10  $\mu\text{mol}$ , 5 mol %), and  $\text{PhSiH}_3$  (49.2  $\mu\text{L}$ , 400  $\mu\text{mol}$ , 2.0 equiv) in EtOH (1.0 mL) was stirred at room temperature for 1 h. Purification by flash column chromatography ( $\text{SiO}_2$ , 6:1 $\rightarrow$ 5:1 pentanes: $\text{Et}_2\text{O}$ ) furnished ether **32** as a colorless oil (13.5 mg, 86.5  $\mu\text{mol}$ , 43%).

Spectroscopic data was identical to that reported in the literature.<sup>12</sup>

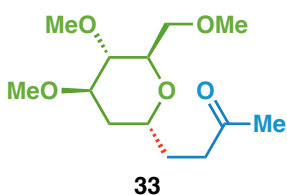

**4-((2R,4R,5S,6R)-4,5-Dimethoxy-6-(methoxymethyl)tetrahydro-2H-pyran-2-yl)butan-2-one (33).** A solution of methyl vinyl ketone (49.6  $\mu\text{L}$ , 600  $\mu\text{mol}$ , 6.0 equiv) and  $\text{PhSiH}_3$  (73.8  $\mu\text{L}$ , 600  $\mu\text{mol}$ , 6.0 equiv) in EtOH (0.50 mL) was added slowly via syringe pump to a mixture of 3,4,6-tri-O-methyl-D-glucal<sup>13</sup> (18.8 mg, 100  $\mu\text{mol}$ , 1.0 equiv),  $\text{Na}_2\text{HPO}_4$  (14.2 mg, 100  $\mu\text{mol}$ , 1.0 equiv),  $\text{Fe}(\text{dibm})_3$  (2.6 mg, 5.00  $\mu\text{mol}$ , 5 mol %) in EtOH (0.50 mL) while heating at 60  $^\circ\text{C}$  with stirring for 1 h. The reaction mixture was then heated at 60  $^\circ\text{C}$  with stirring for another 1 h. After workup following the general procedure, purification by flash column chromatography ( $\text{SiO}_2$ , 2:1 $\rightarrow$ 1:2 hexanes: $\text{EtOAc}$ ) furnished glucal derivative **33** as a colorless oil (16.5 mg, 63.5  $\mu\text{mol}$ , 64%).

**Physical State:** colorless oil.

$[\alpha]_{20}^{\text{D}} = +34.2$  ( $c = 1.00$ ,  $\text{CHCl}_3$ )

**$^1\text{H NMR}$**  (600 MHz,  $\text{CDCl}_3$ ):  $\delta$  3.89 (ddd,  $J = 6.0, 4.5, 4.5$  Hz, 1 H), 3.60 (dd,  $J = 9.6, 5.4$  Hz, 1 H), 3.56 (ddd,  $J = 7.2, 2.4, 2.4$  Hz, 1 H), 3.51 (dd,  $J = 9.6, 3.0$  Hz, 1 H), 3.49 – 3.46 (m, 4 H), 3.40 (s, 3 H), 3.38 (s, 3 H), 3.09 (dd,  $J = 7.2, 7.2$  Hz, 1 H), 2.56 – 2.50 (m, 2 H), 2.15 (s, 3 H), 1.98 – 1.92 (m, 1 H), 1.87 (ddd,  $J = 13.8, 4.8, 4.2$  Hz, 1 H), and 1.70 – 1.62 (m, 2 H).

**$^{13}\text{C NMR}$**  (151 MHz,  $\text{CDCl}_3$ ):  $\delta$  208.6, 78.8, 78.0, 72.3, 71.6, 70.0, 59.7, 59.3, 57.1, 39.9, 33.0, 30.3, and 26.0.

**HRMS ( $m/z$ ):** calcd for  $\text{C}_{13}\text{H}_{25}\text{O}_5$   $[\text{M}+\text{H}]^+$ : 261.1697, found: 261.1706.

**IR (film)  $\nu_{\text{max}}$ :** 2927, 1714, 1453, 1359, 1095, and 730  $\text{cm}^{-1}$ .

**TLC:**  $R_f = 0.12$  (1:1 hexanes: $\text{EtOAc}$ ).

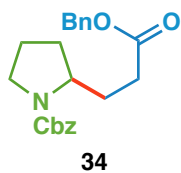

**34**

**Benzyl 2-(3-(benzyloxy)-3-oxopropyl)pyrrolidine-1-carboxylate (34).**

Following the general procedure, a mixture of benzyl 2,3-dihydro-1*H*-pyrrole-1-carboxylate<sup>14</sup> (30.0 mg, 148  $\mu\text{mol}$ , 1.0 equiv), benzyl acrylate (67.8  $\mu\text{L}$ , 443  $\mu\text{mol}$ , 3.0 equiv),  $\text{Na}_2\text{HPO}_4$  (21.0 mg, 148  $\mu\text{mol}$ , 1.0 equiv),  $\text{Fe}(\text{dibm})_3$  (3.8 mg, 7.4  $\mu\text{mol}$ , 5 mol %), and  $\text{PhSiH}_3$  (109  $\mu\text{L}$ , 886  $\mu\text{mol}$ , 6.0 equiv) in EtOH (0.74 mL) was heated at 60 °C with stirring for 10 min. Purification by flash column chromatography ( $\text{SiO}_2$ , 8:2 hexanes:EtOAc) furnished carbamate **34** as a pale yellow oil (35.4 mg, 96.3  $\mu\text{mol}$ , 65%).

Spectroscopic data was identical to that reported in the literature.<sup>11</sup>

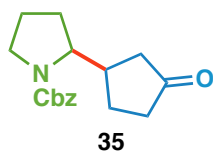

**35**

**Benzyl 2-(3-oxocyclopentyl)pyrrolidine-1-carboxylate (35).**

Following the general procedure, a mixture of benzyl 2,3-dihydro-1*H*-pyrrole-1-carboxylate<sup>14</sup> (30.0 mg, 148  $\mu\text{mol}$ , 1.0 equiv), cyclopent-2-enone (37.5  $\mu\text{L}$ , 443  $\mu\text{mol}$ , 3.0 equiv),  $\text{Na}_2\text{HPO}_4$  (21.0 mg, 148  $\mu\text{mol}$ , 1.0 equiv),  $\text{Fe}(\text{dibm})_3$  (3.8 mg, 7.4  $\mu\text{mol}$ , 5 mol %), and  $\text{PhSiH}_3$  (109  $\mu\text{L}$ , 886  $\mu\text{mol}$ , 6.0 equiv) in EtOH (0.74 mL) was heated at 60 °C with stirring for 10 min. Purification by flash column chromatography ( $\text{SiO}_2$ , 6:4 hexanes:EtOAc) furnished a diastereomeric mixture of carbamates **35** as a pale yellow oil (31.6 mg, 110  $\mu\text{mol}$ , 75%).

Spectroscopic data was identical to that reported in the literature.<sup>11</sup>

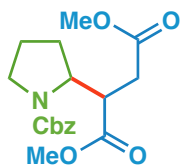

**36**

**Dimethyl 2-(1-((benzyloxy)carbonyl)pyrrolidin-2-yl)succinate (36).**

Following the general procedure, a mixture of benzyl 2,3-dihydro-1*H*-pyrrole-1-carboxylate<sup>14</sup> (30.0 mg, 148  $\mu\text{mol}$ , 1.0 equiv), dimethyl maleate (55.4  $\mu\text{L}$ , 443  $\mu\text{mol}$ , 3.0 equiv),  $\text{Na}_2\text{HPO}_4$  (21.0 mg, 148  $\mu\text{mol}$ , 1.0 equiv),  $\text{Fe}(\text{dibm})_3$  (3.8 mg, 7.4  $\mu\text{mol}$ , 5 mol %), and  $\text{PhSiH}_3$  (36.4  $\mu\text{L}$ , 296  $\mu\text{mol}$ , 2.0 equiv) in EtOH (0.74 mL) was heated at 60 °C with stirring for 10 min. Purification by flash column chromatography ( $\text{SiO}_2$ , 7:3 hexanes:EtOAc) furnished a diastereomeric mixture of carbamates **36** as a pale yellow oil (38.7 mg, 111  $\mu\text{mol}$ , 75%).

Spectroscopic data was identical to that reported in the literature.<sup>11</sup>

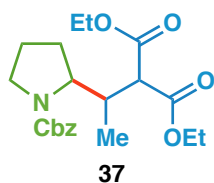

**Diethyl 2-(1-(1-((benzyloxy)carbonyl)pyrrolidin-2-yl)ethyl)malonate (37)**

Following the general procedure, a mixture of benzyl 2,3-dihydro-1*H*-pyrrole-1-carboxylate<sup>14</sup> (20.3 mg, 100 μmol, 1.0 equiv), diethyl 2-ethylidenemalonate (54.8 μL, 300 μmol, 3.0 equiv), Na<sub>2</sub>HPO<sub>4</sub> (14.2 mg, 100 μmol, 1.0 equiv), Fe(dibm)<sub>3</sub> (2.6 mg, 5.0 μmol, 5 mol %), and PhSiH<sub>3</sub> (24.6 μL, 200 μmol, 2.0 equiv) in EtOH (0.50 mL) was heated at 60 °C with stirring for 1 h. Purification by flash column chromatography (SiO<sub>2</sub>, 10:1→5:1 hexanes:EtOAc) furnished a diastereomeric mixture of carbamates **37** as a colorless oil (34.3 mg, 87.7 μmol, 88%).

Spectroscopic data was identical to that reported in the literature.<sup>11</sup>

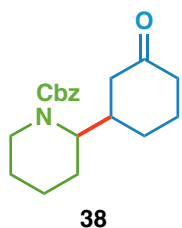

**Benzyl 2-(3-oxocyclohexyl)piperidine-1-carboxylate (38).**

Following the general procedure, a mixture of benzyl 3,4-dihydropyridine-1(2*H*)-carboxylate<sup>15</sup> (21.7 mg, 100 μmol, 1.0 equiv), cyclohex-2-enone (58.0 μL, 600 μmol, 6.0 equiv), Na<sub>2</sub>HPO<sub>4</sub> (14.2 mg, 100 μmol, 1.0 equiv), Fe(dibm)<sub>3</sub> (7.9 mg, 15.0 μmol, 15 mol %), and PhSiH<sub>3</sub> (73.8 μL, 600 μmol, 6.0 equiv) in EtOH (0.50 mL) was heated at 60 °C with stirring for 1 h. Purification by flash column chromatography (SiO<sub>2</sub>, 5:1→3:1 hexanes:EtOAc) furnished a 1:1.5 diastereomeric mixture of carbamates **38** as a colorless oil (17.3 mg, 54.6 μmol, 55%). Data is reported for the mixture of diastereomers.

**Physical State:** colorless oil.

**<sup>1</sup>H NMR** (500 MHz, CDCl<sub>3</sub>, 50 °C): δ 7.36 – 7.34 (m, 5 H), 5.18 – 5.09 (m, 2 H), 4.13 – 4.08 (m, 2 H), 2.76 – 2.70 (m, 1 H), 2.44 – 2.20 (m, 4 H), 2.13 – 2.01 (m, 2 H), 1.95 – 1.71 (m, 2 H), 1.68 – 1.42 (m, 6 H), and 1.39 – 1.30 (m, 1 H).

**<sup>13</sup>C NMR** (126 MHz, acetone-d<sub>6</sub>, 45 °C): δ 210.1, 210.0, 156.5, 139.0, 129.6, 129.0, 128.9, 67.7, 67.7, 57.1, 56.8, 46.1, 45.4, 42.0, 41.9, 40.7, 37.9, 28.8, 27.2, 26.6, 26.2, 25.8, 20.1, and 20.0.

**HRMS (*m/z*):** calcd for C<sub>19</sub>H<sub>26</sub>NO<sub>3</sub> [M+H]<sup>+</sup>: 316.1907, found: 316.1925.

**IR (film) ν<sub>max</sub>:** 2937, 2863, 1685, 1422, 1258, 1087, 736, and 696 cm<sup>-1</sup>.

**TLC:** R<sub>f</sub> = 0.27 (3:1 hexanes:EtOAc).

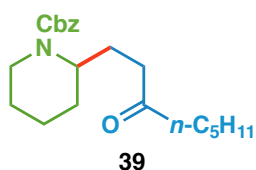

**Benzyl 2-(3-oxooctyl)piperidine-1-carboxylate (39).**

Following the general procedure, a mixture of benzyl 3,4-dihydropyridine-1(2*H*)-carboxylate<sup>15</sup> (21.7 mg, 100 μmol, 1.0 equiv), oct-1-en-3-one (44.9 μL,

300  $\mu\text{mol}$ , 3.0 equiv),  $\text{Na}_2\text{HPO}_4$  (14.2 mg, 100  $\mu\text{mol}$ , 1.0 equiv),  $\text{Fe}(\text{dibm})_3$  (2.6 mg, 5.0  $\mu\text{mol}$ , 5 mol %), and  $\text{PhSiH}_3$  (24.6  $\mu\text{L}$ , 200  $\mu\text{mol}$ , 2.0 equiv) in EtOH (0.50 mL) was heated at 60  $^\circ\text{C}$  with stirring for 1 h. Purification by flash column chromatography ( $\text{SiO}_2$ , 20:1 $\rightarrow$ 10:1 hexanes:EtOAc) furnished carbamate **39** as a colorless oil (21.1 mg, 61.1  $\mu\text{mol}$ , 61%).

**Physical State:** colorless oil.

**$^1\text{H}$  NMR** (600 MHz,  $\text{CDCl}_3$ ):  $\delta$  7.36 – 7.35 (m, 5 H), 5.13 – 5.08 (m, 2 H), 4.29 – 4.27 (m, 1 H), 4.07 – 3.97 (m, 1 H), 2.83 – 2.75 (m, 1 H), 2.34 – 2.21 (m, 4 H), 2.08 – 1.99 (m, 1 H), 1.62 – 1.19 (m, 13 H), and 0.87 (t,  $J = 7.2$  Hz, 3 H).

**$^{13}\text{C}$  NMR** (151 MHz,  $\text{CDCl}_3$ ):  $\delta$  210.9, 155.7, 137.1, 128.6, 128.1, 128.0, 67.1, 50.6, 43.1, 39.4, 39.2, 31.5, 29.2, 25.7, 23.7, 23.6, 22.6, 19.1, and 14.1.

**HRMS ( $m/z$ ):** calcd for  $\text{C}_{21}\text{H}_{31}\text{NO}_3$   $[\text{M}+\text{H}]^+$ : 346.2377, found: 346.2377.

**IR (film)  $\nu_{\text{max}}$ :** 2930, 2860, 1691, 1421, 1257, 1071, 737 and 698  $\text{cm}^{-1}$ .

**TLC:**  $R_f = 0.21$  (5:1 hexanes:EtOAc).

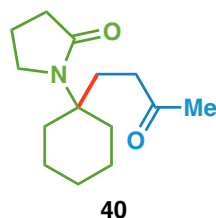

**1-(1-(3-Oxobutyl)cyclohexyl)pyrrolidin-2-one (40).** Following the general procedure, a mixture of 1-(cyclohex-1-en-1-yl)pyrrolidin-2-one<sup>16</sup> (16.5 mg, 100  $\mu\text{mol}$ , 1.0 equiv), methyl vinyl ketone (24.9  $\mu\text{L}$ , 300  $\mu\text{mol}$ , 3.0 equiv),  $\text{Na}_2\text{HPO}_4$  (14.2 mg, 100  $\mu\text{mol}$ , 1.0 equiv),  $\text{Fe}(\text{dibm})_3$  (7.9 mg, 15  $\mu\text{mol}$ , 15 mol %), and  $\text{PhSiH}_3$  (73.8  $\mu\text{L}$ , 600  $\mu\text{mol}$ , 6.0 equiv) in EtOH (0.50 mL) was

heated at 60  $^\circ\text{C}$  with stirring for 1 h. The reaction mixture was then cooled to room temperature and a second portion of methyl vinyl ketone (24.8  $\mu\text{L}$ , 300  $\mu\text{mol}$ , 3.0 equiv),  $\text{Fe}(\text{dibm})_3$  (7.9 mg, 15.0  $\mu\text{mol}$ , 15 mol %), and  $\text{PhSiH}_3$  (73.8  $\mu\text{L}$ , 600  $\mu\text{mol}$ , 6.0 equiv) was added. After heating the reaction mixture at 60  $^\circ\text{C}$  with stirring for 1 h and work up following the general procedure, purification by flash column chromatography ( $\text{SiO}_2$ , 1:1 $\rightarrow$ 1:2 hexanes:EtOAc $\rightarrow$ EtOAc) furnished amide **40** as a colorless oil (16.6 mg, 70.0  $\mu\text{mol}$ , 70%).

**Physical State:** colorless oil.

**$^1\text{H}$  NMR** (600 MHz,  $\text{CDCl}_3$ ):  $\delta$  3.39 (dd,  $J = 7.2, 6.6$  Hz, 2 H), 2.50 (dd,  $J = 7.8, 7.2$  Hz, 2 H), 2.35 – 2.32 (m, 4 H), 2.14 (s, 3 H), 1.94 – 1.90 (m, 4 H), 1.55 – 1.54 (m, 3 H), and 1.39 – 1.34 (m, 5 H).

**$^{13}\text{C}$  NMR** (151 MHz,  $\text{CDCl}_3$ ):  $\delta$  209.2, 176.5, 59.4, 45.5, 38.3, 34.7, 33.6, 31.4, 30.2, 25.8, 22.6, and 18.3.

**HRMS (*m/z*):** calcd for C<sub>14</sub>H<sub>24</sub>NO<sub>2</sub> [M+H]<sup>+</sup>: 238.1802, found: 238.1806.

**IR (film)  $\nu_{\text{max}}$ :** 2929, 2857, 1712, 1671, 1404, 1269, 1166, and 670 cm<sup>-1</sup>.

**TLC:** R<sub>f</sub> = 0.18 (1:2 hexanes:EtOAc).

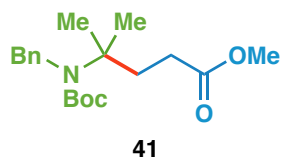

41

**Methyl 4-(benzyl(*tert*-butoxycarbonyl)amino)-4-methylpentanoate (41).** Following the general procedure, a mixture of *tert*-butyl benzyl(prop-1-en-2-yl)carbamate<sup>17</sup> (74.2 mg, 300  $\mu$ mol, 3.0 equiv), methyl acrylate (9.00  $\mu$ L, 100  $\mu$ mol, 1.0 equiv), Na<sub>2</sub>HPO<sub>4</sub> (14.2 mg, 100  $\mu$ mol, 1.0 equiv), Fe(dibm)<sub>3</sub> (2.6 mg, 5.0  $\mu$ mol, 5 mol %), and PhSiH<sub>3</sub> (25.0  $\mu$ L, 200  $\mu$ mol, 2.0 equiv) in EtOH (0.50 mL) was heated at 60 °C with stirring for 1 h. Purification by flash column chromatography (SiO<sub>2</sub>, 5:1 hexanes:EtOAc) furnished carbamate **41** as a pale yellow oil (23.6 mg, 70.3  $\mu$ mol, 70%).

**Physical State:** pale yellow oil.

**<sup>1</sup>H NMR** (600 MHz, CDCl<sub>3</sub>):  $\delta$  7.34 – 7.27 (m, 3 H), 7.21 – 7.20 (m, 2 H), 4.54 (s, 2 H), 3.66 (s, 3 H), 2.27 – 2.24 (m, 2 H), 2.22 – 2.19 (m, 2 H), 1.46 (s, 9 H), and 1.31 (s, 6 H).

**<sup>13</sup>C NMR** (151 MHz, CDCl<sub>3</sub>):  $\delta$  174.4, 156.1, 141.1, 128.5, 126.6, 126.5, 80.1, 58.4, 51.7, 49.2, 36.0, 30.0, 28.6, and 27.9.

**HRMS (*m/z*):** calcd for C<sub>19</sub>H<sub>30</sub>NO<sub>4</sub> [M+H]<sup>+</sup>: 336.2175, found: 336.2172.

**IR (film)  $\nu_{\text{max}}$ :** 2977, 1732, 1682, 1543, 1380, 1366, 1241, 1216, 1159, 1076, 864, and 750 cm<sup>-1</sup>.

**TLC:** R<sub>f</sub> = 0.50 (5:1 hexanes:EtOAc).

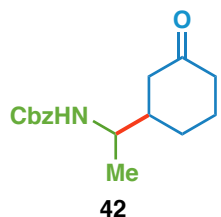

42

**Benzyl (1-(3-oxocyclohexyl)ethyl)carbamate (42).** Following the general procedure, a mixture of benzyl vinylcarbamate<sup>18</sup> (17.7 mg, 100  $\mu$ mol, 1.0 equiv), cyclohex-2-enone (29.0  $\mu$ L, 300  $\mu$ mol, 3.0 equiv), Na<sub>2</sub>HPO<sub>4</sub> (14.2 mg, 100  $\mu$ mol, 1.0 equiv), Fe(dibm)<sub>3</sub> (7.9 mg, 15  $\mu$ mol, 15 mol %), and PhSiH<sub>3</sub> (73.8  $\mu$ L, 600  $\mu$ mol, 6.0 equiv) in EtOH (0.50 mL) was heated at 60 °C with stirring for 1 h. The reaction mixture was then cooled to room temperature and a second portion of cyclohex-2-enone (29.0  $\mu$ L, 300  $\mu$ mol, 3.0 equiv), Fe(dibm)<sub>3</sub> (7.9 mg, 15.0  $\mu$ mol, 15 mol %), and PhSiH<sub>3</sub> (73.8  $\mu$ L, 600  $\mu$ mol, 6.0 equiv) was added. After heating the reaction mixture at 60 °C with stirring for 1 h and work up following the general procedure, purification by flash column chromatography (SiO<sub>2</sub>, 5:1→3:1 hexanes:EtOAc) furnished a diastereomeric mixture of



carbamates **42** as a colorless oil (13.1 mg, 47.6  $\mu\text{mol}$ , 48%). Data is reported for the mixture of diastereomers.

**Physical State:** colorless oil.

**$^1\text{H}$  NMR** (500 MHz,  $\text{CDCl}_3$ , 50  $^\circ\text{C}$ ):  $\delta$  7.37 – 7.30 (m, 5 H), 5.13 – 5.07 (m, 2 H), 4.54 (br s, 1 H), 3.77 – 3.72 (m, 1 H), 2.47 – 2.34 (m, 2 H), 2.27 – 2.20 (m, 1 H), 2.14 – 2.05 (m, 2 H), 1.95 – 1.79 (m, 2 H), 1.63 – 1.54 (m, 1 H), 1.44 – 1.33 (m, 1 H), and 1.16 – 1.14 (m, 3H).

**$^{13}\text{C}$  NMR** (151 MHz,  $\text{CDCl}_3$ ):  $\delta$  211.2, 211.2, 156.1, 156.0, 136.5, 128.7, 128.3, 128.3, 128.3, 67.0, 50.9, 50.7, 44.9, 44.6, 44.6, 44.0, 42.3, 41.5, 41.4, 35.1, 34.8, 28.2, 27.2, 25.8, 25.4, 25.2, 25.1, 24.9, 22.0, 22.0, 18.7, and 18.2.

**HRMS ( $m/z$ ):** calcd for  $\text{C}_{16}\text{H}_{22}\text{NO}_3$   $[\text{M}+\text{H}]^+$ : 276.1594, found: 276.1598.

**IR (film)  $\nu_{\text{max}}$ :** 3318, 2936, 1695, 1528, 1235, 1094, and 741  $\text{cm}^{-1}$ .

**TLC:**  $R_f$  = 0.16 (3:1 hexanes:EtOAc).

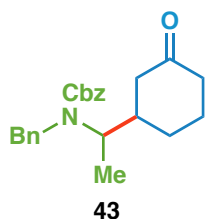

**Benzyl benzyl(1-(3-oxocyclohexyl)ethyl)carbamate (**43**).** Following the general procedure, a mixture of benzyl benzyl(vinyl)carbamate<sup>19</sup> (26.7 mg, 100  $\mu\text{mol}$ , 1.0 equiv), cyclohex-2-enone (58.0  $\mu\text{L}$ , 600  $\mu\text{mol}$ , 6.0 equiv),  $\text{Na}_2\text{HPO}_4$  (14.2 mg, 100  $\mu\text{mol}$ , 1.0 equiv),  $\text{Fe}(\text{dibm})_3$  (7.9 mg, 15.0  $\mu\text{mol}$ , 15 mol %), and  $\text{PhSiH}_3$  (73.8  $\mu\text{L}$ , 600  $\mu\text{mol}$ , 6.0 equiv) in EtOH (0.50 mL) was heated at

60  $^\circ\text{C}$  with stirring for 1 h. Purification by flash column chromatography ( $\text{SiO}_2$ , 5:1 $\rightarrow$ 4:1 hexanes:EtOAc) furnished a 1:1.3 diastereomeric mixture of carbamates **43** as a colorless oil (29.0 mg, 79.4  $\mu\text{mol}$ , 79%). Data is reported for the mixture of diastereomers.

**Physical State:** colorless oil.

**$^1\text{H}$  NMR** (500 MHz,  $\text{CDCl}_3$ , 50  $^\circ\text{C}$ ):  $\delta$  7.29 – 7.21 (m, 10 H), 5.18 – 5.15 (m, 2 H), 4.53 – 4.27 (m, 2 H), 3.92 – 3.65 (m, 1 H), 2.42 – 2.32 (m, 2 H), 2.21 – 2.17 (m, 1 H), 2.07 – 1.78 (m, 4 H), 1.59 – 1.33 (m, 2 H), 1.16 (d,  $J$  = 6.5 Hz, 1.7 H), and 1.11 (d,  $J$  = 6.7 Hz, 1.3 H).

**$^{13}\text{C}$  NMR** (151 MHz,  $\text{C}_6\text{D}_6$ , 55  $^\circ\text{C}$ ):  $\delta$  207.9, 207.7, 156.6, 139.8, 139.7, 137.5, 137.5, 128.6, 128.6, 128.5, 128.3, 127.3, 67.4, 58.0, 57.8, 48.8, 45.4, 45.3, 42.9, 42.7, 41.0, 28.9, 28.7, 25.0, 24.8, 17.2, and 16.3. 11 carbons were not observed due to incidental equivalence.

**HRMS ( $m/z$ ):** calcd for  $\text{C}_{23}\text{H}_{28}\text{NO}_3$   $[\text{M}+\text{H}]^+$ : 366.2064, found: 366.2064.

**IR (film)  $\nu_{\text{max}}$ :** 2942, 1690, 1450, 1096, 733, and 697  $\text{cm}^{-1}$ .

**TLC:**  $R_f$  = 0.33 (3:1 hexanes:EtOAc).

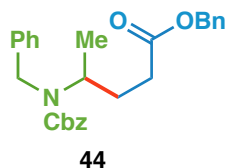

**Benzyl 4-(benzyl((benzyloxy)carbonyl)amino)pentanoate (44).** Following the general procedure, a mixture of benzyl benzyl(vinyl)carbamate<sup>19</sup> (26.7 mg, 100  $\mu\text{mol}$ , 1.0 equiv), benzyl acrylate (45.9  $\mu\text{L}$ , 300  $\mu\text{mol}$ , 3.0 equiv),  $\text{Na}_2\text{HPO}_4$  (14.2 mg, 100  $\mu\text{mol}$ , 1.0 equiv),  $\text{Fe}(\text{dibm})_3$  (2.6 mg, 5.0  $\mu\text{mol}$ , 5 mol %), and  $\text{PhSiH}_3$  (24.6  $\mu\text{L}$ , 200  $\mu\text{mol}$ , 2.0 equiv) in EtOH (0.50 mL) was heated at 60  $^\circ\text{C}$  with stirring for 1 h. Purification by flash column chromatography ( $\text{SiO}_2$ , 5:1 hexanes:EtOAc) furnished carbamate **44** as a colorless oil (31.7 mg, 73.5  $\mu\text{mol}$ , 73%).

**Physical State:** colorless oil.

**$^1\text{H}$  NMR** (500 MHz,  $\text{CDCl}_3$ , 50  $^\circ\text{C}$ ):  $\delta$  7.40 – 7.26 (m, 15 H), 5.20 (s, 2 H), 5.12 (s, 2 H), 4.46 (s, 2 H), 5.20 (m, 1 H), 2.32 (m, 2 H), 2.00 (m, 1 H), 1.84 (m, 1 H), and 1.17 (d,  $J = 6.5$  Hz, 3 H).

**$^{13}\text{C}$  NMR** (126 MHz,  $\text{CDCl}_3$ , 50  $^\circ\text{C}$ ):  $\delta$  183.0, 172.8, 139.1, 136.8, 136.1, 128.5, 128.4, 128.4, 128.2, 127.9, 127.9, 127.3, 127.0, 67.2, 66.2, 52.7, 47.7, 31.4, 29.9, and 19.0.

**HRMS ( $m/z$ ):** calcd for  $\text{C}_{27}\text{H}_{30}\text{NO}_4$   $[\text{M}+\text{H}]^+$ : 432.2169, found: 432.2178.

**IR (film)  $\nu_{\text{max}}$ :** 2937, 1731, 1689, 1452, 1160, 733, and 696  $\text{cm}^{-1}$ .

**TLC:**  $R_f = 0.42$  (3:1 hexanes:EtOAc).

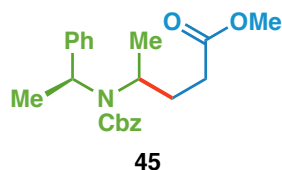

**Methyl 4-(((benzyloxy)carbonyl)((*S*)-1-phenylethyl)amino)pentanoate (45).** Following the general procedure, a mixture of benzyl (*S*)-(1-phenylethyl)(vinyl)carbamate<sup>20</sup> (10.0 mg, 35.5  $\mu\text{mol}$ , 1.0 equiv), methyl acrylate (19.3  $\mu\text{L}$ , 213  $\mu\text{mol}$ , 6.0 equiv),  $\text{Na}_2\text{HPO}_4$  (5.0 mg, 35.5  $\mu\text{mol}$ , 1.0 equiv),  $\text{Fe}(\text{dibm})_3$  (2.8 mg, 5.3  $\mu\text{mol}$ , 15 mol %), and  $\text{PhSiH}_3$  (26.3  $\mu\text{L}$ , 213  $\mu\text{mol}$ , 6.0 equiv) in EtOH (0.18 mL) was heated at 60  $^\circ\text{C}$  with stirring for 1h. Purification by preparative TLC ( $\text{SiO}_2$ , 8:2 hexanes:EtOAc) furnished a 1:1.5 diastereomeric mixture of carbamates **45** as a colorless oil (9.0 mg, 24.4  $\mu\text{mol}$ , 69%). Data is reported for the mixture of diastereomers.

**Physical State:** colorless oil.

**$^1\text{H}$  NMR** (500 MHz,  $\text{CDCl}_3$ , 50  $^\circ\text{C}$ ):  $\delta$  7.34 – 7.22 (m, 10 H), 5.34 (m, 1 H), 5.21 – 5.14 (m, 2H), 3.67 (s, 1.8 H), 3.52 (s, 1.2 H), 3.40 – 3.32 (m, 1 H), 2.35 – 2.22 (m, 1 H), 2.09 – 1.98 (m, 1 H), 1.81 – 1.67 (m, 2 H), 1.57 (d,  $J = 7.1$  Hz, 3 H), 1.49 (br s, 1 H), 1.31 (d,  $J = 6.8$  Hz, 1.2 H), and 0.90 (d,  $J = 6.6$  Hz, 1.8 H).

$^{13}\text{C}$  NMR (151 MHz,  $\text{CDCl}_3$ ):  $\delta$  173.9, 173.7, 141.4, 141.2, 136.9, 128.6, 128.4, 128.4, 128.1, 128.0, 127.6, 127.4, 67.1, 67.1, 51.8, 51.5, 31.6, 31.3, 29.9, and 14.3.

**HRMS** ( $m/z$ ): calcd for  $\text{C}_{22}\text{H}_{27}\text{NNaO}_4$  [ $\text{M}+\text{Na}$ ] $^+$ : 392.1832, found: 392.1833.

**IR** (film)  $\nu_{\text{max}}$ : 3063, 3028, 2951, 1736, 1686, 1435, 1374, 1286, 1206, 1166, 11114, 1026, 744, and  $698\text{ cm}^{-1}$ .

**TLC**:  $R_f = 0.45$  (8:2 hexanes:EtOAc).

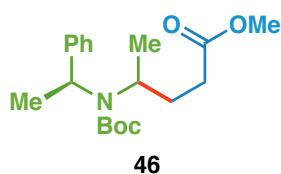

**Methyl 4-((*tert*-butoxycarbonyl)((*S*)-1-phenylethyl)amino)pentanoate (46).** Following the general procedure, a mixture of *tert*-butyl (*S*)-(1-phenylethyl)(vinyl)carbamate<sup>20</sup> (14.3 mg, 57.8  $\mu\text{mol}$ , 1.0 equiv), methyl acrylate (31.4  $\mu\text{L}$ , 347  $\mu\text{mol}$ , 6.0 equiv),

$\text{Na}_2\text{HPO}_4$  (8.2 mg, 57.8  $\mu\text{mol}$ , 1.0 equiv),  $\text{Fe}(\text{dibm})_3$  (4.5 mg, 8.7  $\mu\text{mol}$ , 15 mol %), and  $\text{PhSiH}_3$  (42.8  $\mu\text{L}$ , 347  $\mu\text{mol}$ , 6.0 equiv) in EtOH (0.29 mL) was heated at 60  $^\circ\text{C}$  with stirring for 1h. Purification by preparative TLC ( $\text{SiO}_2$ , 9:1 hexanes:EtOAc) furnished a 1:1.4 diastereomeric mixture of carbamates **46** as a colorless oil (10.7 mg, 31.9  $\mu\text{mol}$ , 55%). Data is reported for the mixture of diastereomers.

**Physical State**: colorless oil.

$^1\text{H}$  NMR (500 MHz,  $\text{CDCl}_3$ , 50  $^\circ\text{C}$ ):  $\delta$  7.35 – 7.21 (m, 5 H), 5.26 (m, 1 H), 3.69 (s, 1.75 H), 3.54 (s, 1.25 H), 3.39 – 3.26 (m, 1 H), 2.36 – 2.25 (m, 1 H), 2.06 – 1.93 (m, 1 H), 1.81 – 1.67 (m, 2 H), 1.56 – 1.54 (m, 3 H), 1.48 – 1.44 (m, 9 H), 1.30 (d,  $J = 6.7$  Hz, 1.25 H), and 0.90 (d,  $J = 6.8$  Hz, 1.75 H).

$^{13}\text{C}$  NMR (151 MHz,  $\text{CDCl}_3$ ):  $\delta$  173.5, 173.3, 127.7, 127.6, 126.8, 126.4, 79.3, 52.8, 52.0, 51.2, 51.0, 31.1, 30.9, 30.2, 30.2, 28.1, and 18.1. 13 carbons were not observed due to incidental equivalence.

**HRMS** ( $m/z$ ): calcd for  $\text{C}_{19}\text{H}_{29}\text{NNaO}_4$  [ $\text{M}+\text{Na}$ ] $^+$ : 358.1989, found: 358.1988.

**IR** (film)  $\nu_{\text{max}}$ : 3028, 2974, 2934, 1737, 1679, 1433, 1365, 1299, 1251, 1159, 1120, 1023, 772, and  $700\text{ cm}^{-1}$ .

**TLC**:  $R_f = 0.57$  (8:2 hexanes:EtOAc).

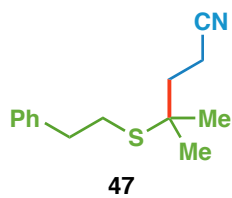

**4-Methyl-4-(phenethylthio)pentanenitrile (47).** Following the general procedure, a mixture of **S1** (17.8 mg, 100  $\mu\text{mol}$ , 1.0 equiv), acrylonitrile (19.8  $\mu\text{L}$ , 300  $\mu\text{mol}$ , 3.0 equiv),  $\text{Na}_2\text{HPO}_4$  (14.2 mg, 100  $\mu\text{mol}$ , 1.0 equiv),  $\text{Fe}(\text{dibm})_3$  (2.6 mg, 5.0  $\mu\text{mol}$ , 5 mol %), and  $\text{PhSiH}_3$  (24.6  $\mu\text{L}$ , 200  $\mu\text{mol}$ , 2.0

equiv) in EtOH (0.50 mL) was stirred at room temperature for 1 h. Purification by flash column chromatography ( $\text{SiO}_2$ , 50:1 $\rightarrow$ 20:1 hexanes:EtOAc) furnished thioether **47** as a colorless oil (15.2 mg, 65.2  $\mu\text{mol}$ , 65%).

**Physical State:** colorless oil.

**$^1\text{H}$  NMR** (600 MHz,  $\text{CDCl}_3$ ):  $\delta$  7.31 (dd,  $J = 7.8, 7.2$  Hz, 2 H), 7.25 – 7.20 (m, 3 H), 2.84 (dd,  $J = 8.4, 7.2$  Hz, 2 H), 2.70 (dd,  $J = 8.4, 7.2$  Hz, 2 H), 2.43 (dd,  $J = 8.4, 7.8$  Hz, 2 H), 1.85 (dd,  $J = 8.4, 7.8$  Hz, 2 H), and 1.29 (s, 6 H).

**$^{13}\text{C}$  NMR** (151 MHz,  $\text{CDCl}_3$ ):  $\delta$  140.5, 128.7, 128.6, 126.7, 120.3, 44.7, 37.4, 35.9, 29.6, 28.7, and 13.2.

**HRMS ( $m/z$ ):** calcd for  $\text{C}_{14}\text{H}_{20}\text{NS}$  [ $\text{M}+\text{H}$ ] $^+$ : 234.1311, found: 234.1312.

**IR (film)  $\nu_{\text{max}}$ :** 2959, 2925, 1453, 1126, 732, and 696  $\text{cm}^{-1}$ .

**TLC:**  $R_f = 0.41$  (10:1 hexanes:EtOAc).

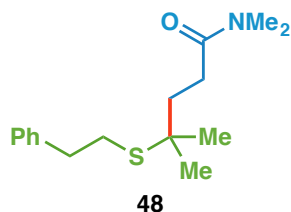

***N,N*,4-Trimethyl-4-(phenethylthio)pentanamide (48).** Following the general procedure, a mixture of **S1** (17.8 mg, 100  $\mu\text{mol}$ , 1.0 equiv), *N,N*-dimethylacrylamide (31.0  $\mu\text{L}$ , 300  $\mu\text{mol}$ , 3.0 equiv),  $\text{Na}_2\text{HPO}_4$  (14.2 mg, 100  $\mu\text{mol}$ , 1.0 equiv),  $\text{Fe}(\text{dibm})_3$  (2.6 mg, 5.0  $\mu\text{mol}$ , 5 mol %), and  $\text{PhSiH}_3$  (24.6  $\mu\text{L}$ , 200  $\mu\text{mol}$ , 2.0 equiv) in EtOH (0.50 mL) was stirred at room temperature

for 1 h. Purification by flash column chromatography ( $\text{SiO}_2$ , 3:1 $\rightarrow$ 2:1 hexanes:EtOAc) furnished thioether **48** as a colorless oil (18.7 mg, 67.0  $\mu\text{mol}$ , 67%).

**Physical State:** colorless oil.

**$^1\text{H}$  NMR** (600 MHz,  $\text{CDCl}_3$ ):  $\delta$  7.30 – 7.27 (m, 2 H), 7.21 – 7.19 (m, 3 H), 2.99 (s, 3 H), 2.94 (s, 3 H), 2.83 (dd,  $J = 7.8, 7.8$  Hz, 2 H), 2.73 (dd,  $J = 7.8, 7.8$  Hz, 2 H), 2.43 – 2.40 (m, 2 H), 1.87 – 1.84 (m, 2 H), and 1.29 (s, 6 H).

**$^{13}\text{C}$  NMR** (151 MHz,  $\text{CDCl}_3$ ):  $\delta$  173.0, 140.9, 128.6, 128.5, 126.4, 45.3, 37.4, 36.8, 36.2, 35.6, 29.5, 29.2, and 29.1.

**HRMS ( $m/z$ ):** calcd for  $\text{C}_{16}\text{H}_{26}\text{NOS}$  [ $\text{M}+\text{H}$ ] $^+$ : 280.1730, found: 280.1734.

**IR (film)  $\nu_{\max}$ :** 2923, 2852, 1642, 1453, 1397, 1129, 736, and 698  $\text{cm}^{-1}$ .

**TLC:**  $R_f = 0.58$  (1:1 hexanes:EtOAc).

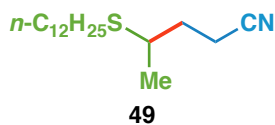

**4-(Dodecylthio)pentanenitrile (49).** Following the general procedure, a mixture of lauryl vinyl sulfide<sup>21</sup> (22.8 mg, 100  $\mu\text{mol}$ , 1.0 equiv), acrylonitrile (19.8  $\mu\text{L}$ , 300  $\mu\text{mol}$ , 3.0 equiv),  $\text{Na}_2\text{HPO}_4$  (14.2 mg, 100  $\mu\text{mol}$ , 1.0 equiv),  $\text{Fe}(\text{dibm})_3$  (2.6 mg, 5.0  $\mu\text{mol}$ , 5 mol %), and  $\text{PhSiH}_3$  (24.6  $\mu\text{L}$ , 200  $\mu\text{mol}$ , 2.0 equiv) in EtOH (0.50 mL) was stirred at 60  $^\circ\text{C}$  for 1 h. A solution of TBAF (1 M in THF, 600  $\mu\text{L}$ , 600  $\mu\text{mol}$ , 6.0 equiv) was then added and the reaction mixture was heated at 60  $^\circ\text{C}$  with stirring for 1 h. Purification by flash column chromatography ( $\text{SiO}_2$ , 100:1 $\rightarrow$ 50:1 hexanes:EtOAc) furnished thioether **49** as a colorless oil (13.6 mg, 48.1  $\mu\text{mol}$ , 48%).

**Physical State:** colorless oil.

**$^1\text{H}$  NMR** (600 MHz,  $\text{CDCl}_3$ ):  $\delta$  2.86 – 2.82 (m, 1 H), 2.61 – 2.47 (m, 2 H), 2.51 (dd,  $J = 7.8, 7.2$  Hz, 2 H), 1.92 – 1.86 (m, 1 H), 1.83 – 1.78 (m, 1 H), 1.59 – 1.55 (m, 2 H), 1.32 (d,  $J = 6.6$  Hz, 3 H), 1.37 – 1.26 (m, 18 H), and 0.88 (dd,  $J = 7.2, 6.6$  Hz, 3 H).

**$^{13}\text{C}$  NMR** (151 MHz,  $\text{CDCl}_3$ ):  $\delta$  119.7, 39.1, 32.4, 32.1, 30.5, 29.9, 29.8, 29.8, 29.7, 29.7, 29.5, 29.4, 29.1, 22.8, 21.7, 15.1, and 14.3.

**HRMS ( $m/z$ ):** calcd for  $\text{C}_{17}\text{H}_{34}\text{NS}$  [ $\text{M}+\text{H}$ ]<sup>+</sup>: 284.2407, found: 284.2409.

**IR (film)  $\nu_{\max}$ :** 2921, 2852, 1457, 1377, 721, and 671  $\text{cm}^{-1}$ .

**TLC:**  $R_f = 0.33$  (10:1 hexanes:EtOAc).

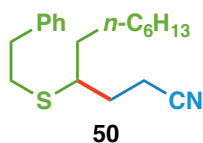

**4-(Phenethylthio)undecanenitrile (50).** Following the general procedure, a mixture of **S2** (24.8 mg, 100  $\mu\text{mol}$ , 1.0 equiv), acrylonitrile (19.8  $\mu\text{L}$ , 300  $\mu\text{mol}$ , 3.0 equiv),  $\text{Na}_2\text{HPO}_4$  (14.2 mg, 100  $\mu\text{mol}$ , 1.0 equiv),  $\text{Fe}(\text{dibm})_3$  (7.9 mg, 15.0  $\mu\text{mol}$ , 15 mol %), and  $\text{PhSiH}_3$  (73.8  $\mu\text{L}$ , 600  $\mu\text{mol}$ , 6.0 equiv) in EtOH (0.50 mL) was stirred at room temperature for 1 h. A second portion of acrylonitrile (19.8  $\mu\text{L}$ , 300  $\mu\text{mol}$ , 3.0 equiv),  $\text{Fe}(\text{dibm})_3$  (7.9 mg, 15  $\mu\text{mol}$ , 15 mol %), and  $\text{PhSiH}_3$  (73.8  $\mu\text{L}$ , 600  $\mu\text{mol}$ , 6.0 equiv) was added. After stirring at room temperature for an additional 1 h, a solution of TBAF (1 M in THF, 1.20 mL, 1.20 mmol, 12.0 equiv) was added and the reaction mixture was heated at 60  $^\circ\text{C}$  with stirring for 1 h. Purification by flash column chromatography ( $\text{SiO}_2$ , 100:1 $\rightarrow$ 50:1 hexanes:EtOAc) furnished thioether **50** as a colorless oil (12.1 mg, 39.9  $\mu\text{mol}$ , 40%).

**Physical State:** colorless oil.

**<sup>1</sup>H NMR** (600 MHz, CDCl<sub>3</sub>): δ 7.31 (dd, *J* = 7.8, 7.2 Hz, 2 H), 7.24 – 7.20 (m, 3 H), 2.87 (dd, *J* = 8.4, 7.2 Hz, 2 H), 2.75 (dd, *J* = 8.4, 7.2 Hz, 2 H), 2.67 – 2.63 (m, 1 H), 2.57 – 2.52 (m, 1 H), 2.49 – 2.44 (m, 1 H), 1.97 – 1.91 (m, 1 H), 1.75 – 1.69 (m, 1 H), 1.57 – 1.21 (m, 12 H), and 0.89 (dd, *J* = 7.2, 6.6 Hz, 3 H).

**<sup>13</sup>C NMR** (151 MHz, CDCl<sub>3</sub>): δ 140.4, 128.7, 128.6, 126.6, 119.9, 45.3, 36.5, 35.3, 32.1, 31.9, 30.5, 29.6, 29.3, 27.0, 22.8, 14.9, and 14.2.

**HRMS (*m/z*):** calcd for C<sub>19</sub>H<sub>30</sub>NS [M+H]<sup>+</sup>: 304.2093, found: 304.2099.

**IR (film) *v*<sub>max</sub>:** 2924, 2853, 1453, 1131, 697 and 671 cm<sup>-1</sup>.

**TLC:** R<sub>f</sub> = 0.40 (10:1 hexanes:EtOAc).

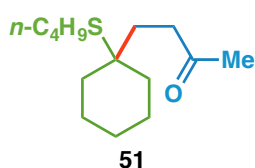

**4-(1-(Butylthio)cyclohexyl)butan-2-one (51).** A solution of methyl vinyl ketone (49.6 μL, 600 μmol, 6.0 equiv) and PhSiH<sub>3</sub> (73.8 μL, 600 μmol, 6.0 equiv) in EtOH (0.50 mL) was added slowly via syringe pump to a mixture of butyl cyclohex-1-enyl sulfide<sup>22</sup> (17.0 mg, 100 μmol, 1.0 equiv),

Na<sub>2</sub>HPO<sub>4</sub> (14.2 mg, 100 μmol, 1.0 equiv), Fe(dibm)<sub>3</sub> (2.6 mg, 5.0 μmol, 5 mol %) in EtOH (0.5 mL) while stirring at room temperature for 1 h. After stirring at room temperature for an additional 1 h, a solution of TBAF (1 M in THF, 600 μL, 600 μmol, 6.0 equiv) was added and the reaction mixture was heated at 60 °C with stirring for 1 h. Purification by flash column chromatography (SiO<sub>2</sub>, 100:1→50:1 hexanes:EtOAc) furnished thioether **51** as a colorless oil (11.8 mg, 48.8 μmol, 49%).

**Physical State:** colorless oil.

**<sup>1</sup>H NMR** (600 MHz, CDCl<sub>3</sub>): δ 2.64 (dd, *J* = 7.8, 7.8 Hz, 2 H), 2.31 (dd, *J* = 7.8, 7.8 Hz, 2 H), 2.17 (s, 3 H), 1.76 (dd, *J* = 7.8, 7.8 Hz, 2 H), 1.71 – 1.63 (m, 4 H), 1.54 – 1.36 (m, 9 H), 1.31 – 1.25 (m, 1 H), and 0.90 (t, *J* = 7.2 Hz, 3 H).

**<sup>13</sup>C NMR** (151 MHz, CDCl<sub>3</sub>): δ 209.3, 49.2, 38.6, 36.6, 33.1, 31.7, 30.4, 26.2, 26.2, 22.5, 22.1, and 13.9.

**HRMS (*m/z*):** calcd for C<sub>14</sub>H<sub>27</sub>OS [M+H]<sup>+</sup>: 243.1777, found: 243.1776.

**IR (film) *v*<sub>max</sub>:** 2925, 2854, 1714, 1447, 1355, and 1160 cm<sup>-1</sup>.

**TLC:** R<sub>f</sub> = 0.62 (10:1 hexanes:EtOAc).

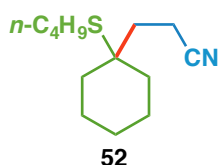

**3-(1-(Butylthio)cyclohexyl)propanenitrile (52).** Following the general procedure, a mixture of butyl cyclohex-1-enyl sulfide<sup>22</sup> (17.0 mg, 100  $\mu$ mol, 1.0 equiv), acrylonitrile (19.8  $\mu$ L, 300  $\mu$ mol, 3.0 equiv), Na<sub>2</sub>HPO<sub>4</sub> (14.2 mg, 100  $\mu$ mol, 1.0 equiv), Fe(dibm)<sub>3</sub> (2.6 mg, 5.0  $\mu$ mol, 5 mol %), and PhSiH<sub>3</sub>

(24.6  $\mu$ L, 200  $\mu$ mol, 2.0 equiv) in EtOH (0.50 mL) was stirred at room temperature for 1 h. A solution of TBAF (1 M in THF, 600  $\mu$ L, 600  $\mu$ mol, 6.0 equiv) was then added and the reaction mixture was heated at 60 °C with stirring for 1 h. Purification by flash column chromatography (SiO<sub>2</sub>, 100:1→50:1 hexanes:EtOAc) furnished thioether **52** as a colorless oil (11.3 mg, 50.2  $\mu$ mol, 50%).

**Physical State:** colorless oil.

**<sup>1</sup>H NMR** (600 MHz, CDCl<sub>3</sub>):  $\delta$  2.56 – 2.54 (m, 2 H), 2.31 (t,  $J$  = 7.2 Hz, 2 H), 1.86 – 1.83 (m, 2 H), 1.73 – 1.64 (m, 4 H), 1.60 – 1.34 (m, 9 H), 1.31 – 1.25 (m, 1 H), and 0.92 (t,  $J$  = 7.2 Hz, 3 H).

**<sup>13</sup>C NMR** (151 MHz, CDCl<sub>3</sub>):  $\delta$  120.7, 49.0, 36.0, 35.9, 31.6, 26.3, 26.0, 22.5, 21.9, 13.9, and 12.2.

**HRMS ( $m/z$ ):** calcd for C<sub>13</sub>H<sub>24</sub>NS [M+H]<sup>+</sup>: 226.1624, found: 226.1621.

**IR (film)  $\nu_{\max}$ :** 2928, 2856, 2310, 1452, and 670 cm<sup>-1</sup>.

**TLC:** R<sub>f</sub> = 0.65 (10:1 hexanes:EtOAc).

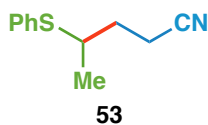

**4-(Phenylthio)pentanenitrile (53).** Following the general procedure, a mixture of phenyl vinyl sulfide (13.6 mg, 100  $\mu$ mol, 1.0 equiv), acrylonitrile (19.6  $\mu$ L, 300  $\mu$ mol, 3.0 equiv), Na<sub>2</sub>HPO<sub>4</sub> (14.2 mg, 100  $\mu$ mol, 1.0 equiv),

Fe(dibm)<sub>3</sub> (2.6 mg, 5.0  $\mu$ mol, 5 mol %), and PhSiH<sub>3</sub> (73.8  $\mu$ L, 600  $\mu$ mol, 6.0 equiv) in EtOH (0.50 mL) was stirred at room temperature for 1 h. Purification by flash column chromatography (SiO<sub>2</sub>, 50:1→20:1 hexanes:EtOAc) furnished thioether **53** as a colorless oil (12.8 mg, 67.0  $\mu$ mol, 67%).

**Physical State:** colorless oil.

**<sup>1</sup>H NMR** (600 MHz, CDCl<sub>3</sub>):  $\delta$  7.43 – 7.41 (m, 2 H), 7.34 – 7.31 (m, 2 H), 7.30 – 7.28 (m, 1 H), 3.27 (dq,  $J$  = 6.8, 6.8, 6.8 Hz, 1 H), 2.62 – 2.50 (m, 2 H), 1.92 – 1.83 (m, 2 H), and 1.32 (d,  $J$  = 7.2 Hz, 3 H).

**<sup>13</sup>C NMR** (151 MHz, CDCl<sub>3</sub>):  $\delta$  133.5, 133.1, 129.2, 127.8, 119.4, 42.6, 32.0, 21.1, and 15.0.

**HRMS (*m/z*):** calcd for C<sub>11</sub>H<sub>14</sub>NS [M+H]<sup>+</sup>: 192.0841, found: 192.0845.

**IR (film)  $\nu_{\max}$ :** 2962, 2925, 2866, 2247, 1582, 1475, 1439, 1023, 744, and 692 cm<sup>-1</sup>.

**TLC:** R<sub>f</sub> = 0.39 (10:1 hexanes:EtOAc).

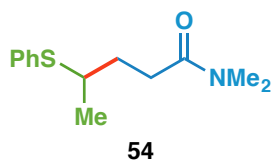

***N,N*-Dimethyl-4-(phenylthio)pentanamide (54).** Following the general procedure, a mixture of phenyl vinyl sulfide (13.6 mg, 100  $\mu$ mol, 1.0 equiv), *N,N*-dimethylacrylamide (31.0  $\mu$ L, 300  $\mu$ mol, 3.0 equiv), Na<sub>2</sub>HPO<sub>4</sub> (14.2 mg, 100  $\mu$ mol, 1.0 equiv), Fe(dibm)<sub>3</sub> (2.6 mg, 5.0  $\mu$ mol, 5 mol %), and PhSiH<sub>3</sub> (73.8  $\mu$ L, 600  $\mu$ mol, 6.0 equiv) in EtOH (0.50 mL) was stirred at room temperature for 1 h. Purification by flash column chromatography (SiO<sub>2</sub>, 2:1→1:1 hexanes:EtOAc) furnished thioether **54** as a colorless oil (11.4 mg, 48.1  $\mu$ mol, 48%).

**Physical State:** colorless oil.

**<sup>1</sup>H NMR** (600 MHz, CDCl<sub>3</sub>):  $\delta$  7.38 (d, *J* = 7.8 Hz, 2 H), 7.25 (dd, *J* = 7.8, 7.2 Hz, 2 H), 7.21 (dd, *J* = 7.2, 7.2 Hz, 1 H), 3.32 (dq, *J* = 6.7, 6.7, 6.7 Hz, 1 H), 2.96 (s, 3 H), 2.92 (s, 3 H), 2.55 – 2.49 (m, 2 H), 2.01 – 1.95 (m, 1 H), 1.87 – 1.81 (m, 1 H), and 1.32 (d, *J* = 6.6 Hz, 3 H).

**<sup>13</sup>C NMR** (151 MHz, CDCl<sub>3</sub>):  $\delta$  172.5, 135.2, 131.9, 129.0, 126.8, 43.2, 37.3, 35.5, 32.0, 30.7, and 21.7.

**HRMS (*m/z*):** calcd for C<sub>13</sub>H<sub>20</sub>NOS [M+H]<sup>+</sup>: 238.1260, found: 238.1267.

**IR (film)  $\nu_{\max}$ :** 2925, 1641, 1424, 1270, 991, 757, and 671 cm<sup>-1</sup>.

**TLC:** R<sub>f</sub> = 0.31 (1:1 hexanes:EtOAc).

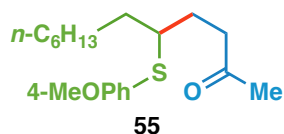

**5-((4-Methoxyphenyl)thio)dodecan-2-one (55).** A solution of methyl vinyl ketone (49.6  $\mu$ L, 600  $\mu$ mol, 6.0 equiv) and PhSiH<sub>3</sub> (73.8  $\mu$ L, 600  $\mu$ mol, 6.0 equiv) in EtOH (0.5 mL) was added slowly via syringe pump to a mixture of **S3** (25.0 mg, 100  $\mu$ mol, 1.0 equiv), Na<sub>2</sub>HPO<sub>4</sub> (14.2 mg, 100  $\mu$ mol, 1.0 equiv), Fe(dibm)<sub>3</sub> (2.6 mg, 5.0  $\mu$ mol, 5 mol %) in EtOH (0.50 mL) while stirring at room temperature for 1 h. Purification by flash column chromatography (SiO<sub>2</sub>, 50:1→20:1 hexanes:EtOAc) furnished thioether **55** as a colorless oil (11.2 mg, 34.8  $\mu$ mol, 35%).

**Physical State:** colorless oil.



**<sup>1</sup>H NMR** (600 MHz, CDCl<sub>3</sub>): δ 7.34 (d, *J* = 7.8 Hz, 2 H), 6.83 (d, *J* = 7.8 Hz, 2 H), 3.80 (s, 3 H), 2.86 – 2.83 (m, 1 H), 2.66 – 2.69 (m, 2 H), 2.13 (s, 3 H), 1.89 – 1.83 (m, 1 H), 1.68 – 1.62 (m, 1 H), 1.51 – 1.42 (m, 4 H), 1.29 – 1.22 (m, 8 H), and 0.88 (dd, *J* = 7.2, 6.6 Hz, 3 H).

**<sup>13</sup>C NMR** (151 MHz, CDCl<sub>3</sub>): δ 208.8, 159.6, 135.8, 124.7, 114.6, 55.5, 50.0, 40.9, 34.9, 32.0, 30.2, 29.6, 29.3, 28.1, 27.0, 22.8, and 14.3.

**HRMS (*m/z*)**: calcd for C<sub>19</sub>H<sub>31</sub>O<sub>2</sub>S [M+H]<sup>+</sup>: 323.2039, found: 323.2047.

**IR (film) *v*<sub>max</sub>**: 2924, 2853, 1714, 1592, 1492, 1242, 826, and 670 cm<sup>-1</sup>.

**TLC**: R<sub>f</sub> = 0.31 (10:1 hexanes:EtOAc).

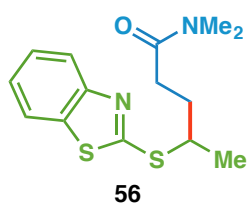

**4-(Benzo[d]thiazol-2-ylthio)-*N,N*-dimethylpentanamide (56)**. Following the general procedure, a mixture of 2-(vinylthio)benzo[d]thiazole<sup>23</sup> (19.3 mg, 100 μmol, 1.0 equiv), *N,N*-dimethylacrylamide (31.0 μL, 300 μmol, 3.0 equiv), Na<sub>2</sub>HPO<sub>4</sub> (14.2 mg, 100 μmol, 1.0 equiv), Fe(dibm)<sub>3</sub> (2.6 mg, 5.0 μmol, 5 mol %), and PhSiH<sub>3</sub> (24.6 μL, 200 μmol, 2.0 equiv) in EtOH (0.50 mL) was stirred at room temperature for 1 h. Purification by flash column chromatography (SiO<sub>2</sub>, 2:1→1:1 hexanes:EtOAc) furnished thioether **56** as a colorless oil (16.0 mg, 54.4 μmol, 54%).

**Physical State**: colorless oil.

**<sup>1</sup>H NMR** (600 MHz, CDCl<sub>3</sub>): δ 7.85 (d, *J* = 8.4 Hz, 1 H), 7.75 (d, *J* = 7.8 Hz, 1 H), 7.41 (dd, *J* = 7.8, 7.2 Hz, 1 H), 7.29 (dd, *J* = 7.8, 7.8 Hz, 1 H), 4.06 (dq, *J* = 6.8, 6.8, 6.8 Hz, 1 H), 2.94 (s, 3 H), 2.93 (s, 3 H), 2.58 – 2.49 (m, 2 H), 2.22 – 2.17 (m, 1 H), 2.07 – 2.00 (m, 1 H), and 1.55 (d, *J* = 6.6 Hz, 3 H).

**<sup>13</sup>C NMR** (151 MHz, CDCl<sub>3</sub>): δ 172.1, 166.3, 153.4, 135.5, 126.1, 124.4, 121.7, 121.1, 44.6, 37.3, 35.6, 32.2, 30.8, and 22.1.

**HRMS (*m/z*)**: calcd for C<sub>14</sub>H<sub>19</sub>N<sub>2</sub>OS<sub>2</sub> [M+H]<sup>+</sup>: 295.0933, found: 295.0939.

**IR (film) *v*<sub>max</sub>**: 2925, 1642, 1424, 991, 757, and 671 cm<sup>-1</sup>.

**TLC**: R<sub>f</sub> = 0.24 (1:1 hexanes:EtOAc).

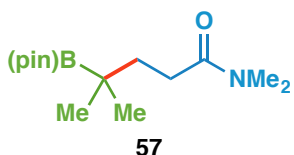

***N,N*,4-Trimethyl-4-(4,4,5,5-tetramethyl-1,3,2-dioxaborolan-2-yl)pentanamide (57)**. Following the general procedure, a mixture of isopropenylboronic acid pinacol ester (30.0 mg, 179 μmol, 1.0 equiv), *N,N*-dimethylacrylamide (55.2 μL, 536 μmol, 3.0 equiv), Na<sub>2</sub>HPO<sub>4</sub>

(25.3 mg, 179  $\mu\text{mol}$ , 1.0 equiv),  $\text{Fe}(\text{acac})_3$  (3.2 mg, 8.9  $\mu\text{mol}$ , 5 mol %), and  $\text{PhSiH}_3$  (66.0  $\mu\text{L}$ , 536  $\mu\text{mol}$ , 3.0 equiv) in EtOH (0.89 mL) was heated at 60  $^\circ\text{C}$  with stirring for 1 h. Purification by flash column chromatography ( $\text{SiO}_2$ , 1:1 hexanes:EtOAc) furnished boronic ester **57** as a pale yellow oil (33.8 mg, 126  $\mu\text{mol}$ , 70%).

**Physical State:** pale yellow oil.

**$^1\text{H}$  NMR** (600 MHz,  $\text{CDCl}_3$ ):  $\delta$  3.02 (s, 3 H), 2.92 (s, 3 H), 2.31 – 2.28 (m, 2 H), 1.60 – 1.57 (m, 2 H), 1.21 (s, 12 H), and 0.94 (s, 6 H).

**$^{13}\text{C}$  NMR** (151 MHz,  $\text{CDCl}_3$ ):  $\delta$  174.0, 83.1, 37.5, 36.3, 35.5, 31.0, 24.9, and 24.8. The boron-bound carbon was not observed due to quadrupolar relaxation.

**$^{11}\text{B}$  NMR** (128 MHz,  $\text{CDCl}_3$ ):  $\delta$  15.2.

**HRMS** ( $m/z$ ): calcd for  $\text{C}_{14}\text{H}_{29}\text{BNO}_3$  [ $\text{M}+\text{H}$ ] $^+$ : 270.2235, found: 270.2234.

**IR** (film)  $\nu_{\text{max}}$ : 2974, 2934, 2862, 1645, 1474, 1391, 1366, 1307, 1270, 1212, 1132, 966, and 853  $\text{cm}^{-1}$ .

**TLC:**  $R_f$  = 0.39 (1:1 hexanes:EtOAc).

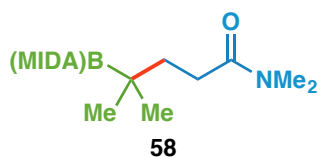

**$N,N,4$ -Trimethyl-4-(6-methyl-4,8-dioxo-1,3,6,2-dioxazaborocan-2-yl)pentanamide (**58**).** Following the general procedure using THF as a cosolvent, a mixture of isopropenylboronic acid MIDA ester (30.0 mg, 152  $\mu\text{mol}$ , 1.0 equiv),  $N,N$ -dimethylacrylamide (47.1  $\mu\text{L}$ , 457  $\mu\text{mol}$ , 3.0 equiv),  $\text{Na}_2\text{HPO}_4$  (21.6 mg, 153  $\mu\text{mol}$ , 1.0 equiv),  $\text{Fe}(\text{acac})_3$  (2.7 mg, 7.6  $\mu\text{mol}$ , 5 mol %), and  $\text{PhSiH}_3$  (56.3  $\mu\text{L}$ , 457  $\mu\text{mol}$ , 3.0 equiv) in EtOH (0.38 mL) and THF (0.38 mL) was heated at 60  $^\circ\text{C}$  with stirring for 30 min. Purification by flash column chromatography ( $\text{SiO}_2$ , 94:6 $\rightarrow$ 9:1 DCM:MeOH) furnished MIDA boronate **58** as a colorless amorphous solid (26.2 mg, 87.9  $\mu\text{mol}$ , 58%).

**Physical State:** colorless amorphous solid.

**$^1\text{H}$  NMR** (600 MHz, acetone- $d_6$ ):  $\delta$  4.18 (d,  $J$  = 16.9 Hz, 2 H), 4.03 (d,  $J$  = 16.8 Hz, 2 H), 3.28 (s, 3 H), 3.03 (s, 3 H), 2.84 (s, 3 H), 2.36 – 2.33 (m, 2 H), 1.66 – 1.64 (m, 2 H), and 0.95 (s, 6 H).

**$^{13}\text{C}$  NMR** (151 MHz, acetone- $d_6$ ):  $\delta$  173.9, 168.9, 64.0, 47.3, 37.4, 35.3, 35.1, 28.6, and 23.9. The boron-bound carbon was not observed due to quadrupolar relaxation.

**$^{11}\text{B}$  NMR** (128 MHz, acetone- $d_6$ ):  $\delta$  -6.4.

**HRMS** ( $m/z$ ): calcd for  $\text{C}_{13}\text{H}_{24}\text{BN}_2\text{O}_5$  [ $\text{M}+\text{H}$ ] $^+$ : 299.1773, found: 299.1779.

**IR (film)  $\nu_{\max}$ :** 2999, 2949, 2872, 1739, 1604, 1472, 1404, 1343, 1302, 1251, 1044, 984, and 858  $\text{cm}^{-1}$ .

**TLC:**  $R_f = 0.19$  (95:5 DCM:MeOH).

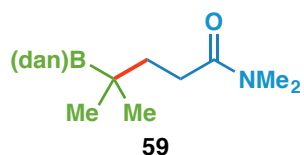

**$N,N,4$ -Trimethyl-4-(1*H*-naphtho[1,8-*de*][1,3,2]diazaborinin-2(3*H*)-yl)pentanamide (59).** Following the general procedure, a mixture of **S4** (30.0 mg, 144  $\mu\text{mol}$ , 1.0 equiv), *N,N*-dimethylacrylamide (44.6  $\mu\text{L}$ , 433  $\mu\text{mol}$ , 3.0 equiv),  $\text{Na}_2\text{HPO}_4$  (20.5 mg, 144  $\mu\text{mol}$ , 1.0 equiv),  $\text{Fe}(\text{acac})_3$  (2.6 mg, 7.2  $\mu\text{mol}$ , 5 mol %), and  $\text{PhSiH}_3$  (53.3  $\mu\text{L}$ , 433  $\mu\text{mol}$ , 3.0 equiv) in EtOH (0.72 mL) was heated at 60  $^\circ\text{C}$  with stirring for 50 min. Purification by flash column chromatography ( $\text{SiO}_2$ , 3:7 $\rightarrow$ 2:8 hexanes:EtOAc) furnished boronamide **59** as a colorless amorphous solid (31.6 mg, 102  $\mu\text{mol}$ , 71%).

**Physical State:** colorless amorphous solid.

**$^1\text{H}$  NMR** (600 MHz,  $\text{CDCl}_3$ ):  $\delta$  7.10 (dd,  $J = 7.4, 8.2$  Hz, 2 H), 7.00, (dd,  $J = 0.8, 8.3$  Hz, 2 H), 6.34 (dd,  $J = 0.9, 7.3$  Hz, 2 H), 5.77 (br s, 2 H), 2.96 (s, 3 H), 2.92 (s, 3 H), 2.31 – 2.28(m, 2 H), 1.71 – 1.69 (m, 2 H), and 1.04 (s, 6 H).

**$^{13}\text{C}$  NMR** (151 MHz,  $\text{CDCl}_3$ ):  $\delta$  173.5, 141.2, 136.4, 127.7, 119.6, 117.6, 105.9, 37.4, 36.5, 35.6, 30.2, and 25.7. The boron-bound carbon was not observed due to quadrupolar relaxation.

**$^{11}\text{B}$  NMR** (128 MHz,  $\text{CDCl}_3$ ):  $\delta$  14.2.

**HRMS ( $m/z$ ):** calcd for  $\text{C}_{18}\text{H}_{25}\text{BN}_3\text{O}$  [ $\text{M}+\text{H}$ ] $^+$ : 310.2085, found: 310.2086.

**IR (film)  $\nu_{\max}$ :** 2930, 2862, 1621, 1596, 1515, 1472, 1407, 1318, 1149, 1108, 909, and 821  $\text{cm}^{-1}$ .

**TLC:**  $R_f = 0.21$  (3:7 hexanes:EtOAc).

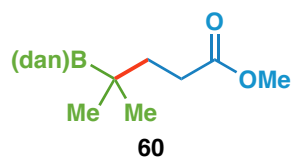

**Methyl 4-methyl-4-(1*H*-naphtho[1,8-*de*][1,3,2]diazaborinin-2(3*H*)-yl)pentanoate (60).** Following the general procedure, a mixture of **S4** (30.0 mg, 144  $\mu\text{mol}$ , 1.0 equiv), methyl acrylate (39.2  $\mu\text{L}$ , 433  $\mu\text{mol}$ , 3.0 equiv),  $\text{Na}_2\text{HPO}_4$  (20.5 mg, 144  $\mu\text{mol}$ , 1.0 equiv),  $\text{Fe}(\text{acac})_3$  (2.6 mg, 7.2  $\mu\text{mol}$ , 5 mol %), and  $\text{PhSiH}_3$  (53.3  $\mu\text{L}$ , 433  $\mu\text{mol}$ , 3.0 equiv) in EtOH (0.72 mL) was heated at 60  $^\circ\text{C}$  with stirring for 70 min. Purification by flash column chromatography ( $\text{SiO}_2$ , 9:1 hexanes:EtOAc) furnished boronamide **60** as a colorless oil (36.5 mg, 123  $\mu\text{mol}$ , 86%).

**Physical State:** colorless oil.

**<sup>1</sup>H NMR** (600 MHz, CDCl<sub>3</sub>): δ 7.11 (dd, *J* = 7.8 Hz, 2 H), 7.02 (d, *J* = 8.1 Hz, 2 H), 6.34 (d, *J* = 7.3 Hz, 2 H), 5.65 (br s, 2 H), 3.64 (s, 3 H), 2.34 – 2.31 (m, 2 H), 1.71 – 1.69 (m, 2 H), and 1.03 (s, 6 H).

**<sup>13</sup>C NMR** (151 MHz, CDCl<sub>3</sub>): δ 174.7, 141.1, 136.4, 127.7, 119.6, 117.7, 105.9, 51.8, 36.4, 31.2, and 25.3. The boron-bound carbon was not observed due to quadrupolar relaxation.

**<sup>11</sup>B NMR** (128 MHz, CDCl<sub>3</sub>): δ 13.7.

**HRMS (*m/z*)**: calcd for C<sub>17</sub>H<sub>22</sub>BN<sub>2</sub>O<sub>2</sub> [M+H]<sup>+</sup>: 297.1769, found: 297.1769.

**IR (film) ν<sub>max</sub>**: 3052, 2946, 2859, 1721, 1506, 1409, 1371, 1319, 1164, 1105, 907, 818, and 762 cm<sup>-1</sup>.

**TLC**: R<sub>f</sub> = 0.32 (9:1 hexanes:EtOAc).

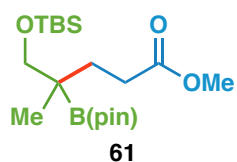

**Methyl 5-((*tert*-butyldimethylsilyloxy)-4-methyl-4-(4,4,5,5-tetramethyl-1,3,2-dioxaborolan-2-yl)pentanoate (61)**. Following the general procedure, a mixture of *tert*-butyldimethyl((2-(4,4,5,5-tetramethyl-1,3,2-dioxaborolan-2-yl)allyloxy)silane<sup>24</sup> (30.0 mg, 101 μmol, 1.0 equiv), methyl acrylate (27.3

μL, 302 μmol, 3.0 equiv), Na<sub>2</sub>HPO<sub>4</sub> (14.3 mg, 101 μmol, 1.0 equiv), Fe(acac)<sub>3</sub> (1.8 mg, 5.0 μmol, 5 mol %), and PhSiH<sub>3</sub> (37.2 μL, 302 μmol, 3.0 equiv) in EtOH (0.50 mL) was heated at 60 °C with stirring for 70 min. Purification by flash column chromatography (SiO<sub>2</sub>, 9:1 hexanes:EtOAc) furnished boronic ester **61** as a colorless oil (18.3 mg, 47.4 μmol, 47%).

**Physical State**: colorless oil.

**<sup>1</sup>H NMR** (600 MHz, CDCl<sub>3</sub>): δ 3.65 (s, 3 H), 3.48 (d, *J* = 9.2 Hz, 1 H), 3.43 (d, *J* = 9.2 Hz, 1 H), 2.34 – 2.31 (m, 2 H), 1.78 (ddd, *J* = 7.2, 9.6, 13.3 Hz, 1 H), 1.58 – 1.52 (m, 1 H), 1.22 (s, 12 H), 0.91 (s, 3 H), 0.88 (s, 9 H), –0.02 (s, 3 H), and –0.02 (s, 3 H).

**<sup>13</sup>C NMR** (151 MHz, CDCl<sub>3</sub>): δ 174.9, 83.3, 69.9, 51.6, 30.8, 30.3, 26.1, 24.9, 18.8, 18.4, and –5.4. The boron-bound carbon was not observed due to quadrupolar relaxation.

**<sup>11</sup>B NMR** (128 MHz, CDCl<sub>3</sub>): δ 15.0.

**HRMS (*m/z*)**: calcd for C<sub>19</sub>H<sub>40</sub>BO<sub>5</sub>Si [M+H]<sup>+</sup>: 387.2733, found: 387.2235.

**IR (film) ν<sub>max</sub>**: 2953, 2929, 2856, 1741, 1462, 1372, 1315, 1255, 1144, 1080, 837, and 775 cm<sup>-1</sup>.

**TLC**: R<sub>f</sub> = 0.47 (9:1 hexanes:EtOAc).

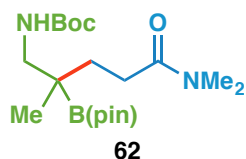

**tert-Butyl (5-(dimethylamino)-2-methyl-5-oxo-2-(4,4,5,5-tetramethyl-1,3,2-dioxaborolan-2-yl)pentyl)carbamate (62).**

Following the general procedure, a mixture of *tert*-butyl (2-(4,4,5,5-tetramethyl-1,3,2-dioxaborolan-2-yl)allyl)carbamate<sup>24</sup> (15.0 mg, 53.0  $\mu$ mol, 1.0 equiv), *N,N*-dimethylacrylamide (16.4  $\mu$ L, 159  $\mu$ mol, 3.0 equiv), Na<sub>2</sub>HPO<sub>4</sub> (7.5 mg, 53.0  $\mu$ mol, 1.0 equiv), Fe(acac)<sub>3</sub> (0.9 mg, 2.7  $\mu$ mol, 5 mol %), and PhSiH<sub>3</sub> (19.6  $\mu$ L, 159  $\mu$ mol, 3.0 equiv) in EtOH (0.27 mL) was heated at 60 °C with stirring for 1 h. Purification by preparative TLC (SiO<sub>2</sub>, 94:6 DCM:MeOH) furnished boronic ester **62** as a colorless oil (6.5 mg, 16.9  $\mu$ mol, 32%).

**Physical State:** colorless oil.

**<sup>1</sup>H NMR** (600 MHz, CDCl<sub>3</sub>):  $\delta$  4.95 (br s, 1 H), 3.15 (dd, *J* = 12.8, 6.1 Hz, 1 H), 3.04 – 3.01 (m, 4 H), 2.93 (s, 3 H), 2.34 – 2.31 (m, 2 H), 1.75 – 1.70 (m, 2 H), 1.42 (s, 9 H), 1.23 (s, 12 H), and 0.94 (s, 3 H).

**<sup>13</sup>C NMR** (151 MHz, CDCl<sub>3</sub>):  $\delta$  173.6, 156.3, 83.5, 47.2, 37.5, 35.6, 31.2, 29.9, 29.5, 28.6, 25.0, 24.9, and 19.9. The boron-bound carbon was not observed due to quadrupolar relaxation.

**<sup>11</sup>B NMR** (128 MHz, CDCl<sub>3</sub>):  $\delta$  14.5.

**HRMS (*m/z*):** calcd for C<sub>19</sub>H<sub>38</sub>BN<sub>2</sub>O<sub>5</sub> [M+H]<sup>+</sup>: 385.2868, found: 385.2868.

**IR (film)  $\nu_{\max}$ :** 2926, 1712, 1640, 1508, 1458, 1367, 1316, 1261, 1168, 1142, 852, and 870 cm<sup>-1</sup>.

**TLC:** R<sub>f</sub> = 0.25 (94:6 DCM:MeOH).

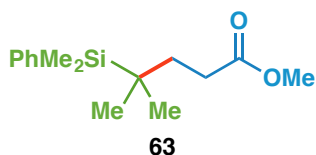

**Methyl 4-(dimethyl(phenyl)silyl)-4-methylpentanoate (63).**

Following the general procedure, a mixture of dimethyl(phenyl)(prop-1-en-2-yl)silane<sup>25</sup> (17.6 mg, 100  $\mu$ mol, 1.0 equiv), methyl acrylate (27.0  $\mu$ L, 300  $\mu$ mol, 3.0 equiv), Na<sub>2</sub>HPO<sub>4</sub> (14.2 mg, 100  $\mu$ mol, 1.0 equiv), Fe(acac)<sub>3</sub> (17.7 mg, 50.0  $\mu$ mol, 50 mol %), and PhSiH<sub>3</sub> (25.0  $\mu$ L, 200  $\mu$ mol, 2.0 equiv) in *n*-PrOH (0.50 mL) was heated at 80 °C with stirring for 1 h. Purification by flash column chromatography (SiO<sub>2</sub>, 10:1 hexanes:EtOAc) furnished silane **63** as a pale yellow oil (16.2 mg, 61.2  $\mu$ mol, 61%).

**Physical State:** pale yellow oil.

**<sup>1</sup>H NMR** (600 MHz, CDCl<sub>3</sub>):  $\delta$  7.52 – 7.50 (m, 2 H), 7.37 – 7.33 (m, 3 H), 3.64 (s, 3 H), 2.24 – 2.21 (m, 2 H), 1.65 – 1.62 (m, 2 H), 0.87 (s, 6 H), and 0.30 (s, 6 H).

$^{13}\text{C}$  NMR (151 MHz,  $\text{CDCl}_3$ ):  $\delta$  175.2, 137.4, 134.7, 129.1, 127.7, 51.7, 33.3, 28.6, 22.5, 19.4, and  $-5.7$ .

**HRMS** ( $m/z$ ): calcd for  $\text{C}_{15}\text{H}_{24}\text{NaO}_2\text{Si}$  [ $\text{M}+\text{Na}$ ] $^+$ : 287.1438, found: 287.1432.

**IR** (film)  $\nu_{\text{max}}$ : 2955, 2861, 1738, 1464, 1429, 1365, 1253, 1194, 1111, 1018, 816, 770, 737, 668, and  $475\text{ cm}^{-1}$ .

**TLC**:  $R_f = 0.60$  (10:1 hexanes:EtOAc).

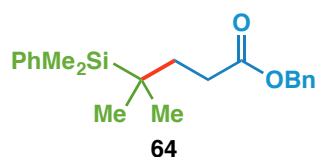

**Benzyl 4-(dimethyl(phenyl)silyl)-4-methylpentanoate (64).**

Following the general procedure, a mixture of dimethyl(phenyl)(prop-1-en-2-yl)silane<sup>25</sup> (17.6 mg, 100  $\mu\text{mol}$ , 1.0 equiv), acrylic acid (45.0  $\mu\text{L}$ , 300  $\mu\text{mol}$ , 3.0 equiv),  $\text{Fe}(\text{acac})_3$  (17.7 mg, 50.0  $\mu\text{mol}$ , 50 mol %), and  $\text{PhSiH}_3$  (25.0  $\mu\text{L}$ , 200  $\mu\text{mol}$ , 2.0 equiv) in *n*-PrOH (0.50 mL) was heated at  $80\text{ }^\circ\text{C}$  with stirring for 1 h. Purification by flash column chromatography ( $\text{SiO}_2$ , 10:1 hexanes:EtOAc) furnished silane **64** as a pale yellow oil (18.4 mg, 54.0  $\mu\text{mol}$ , 54%).

**Physical State**: pale yellow oil.

$^1\text{H}$  NMR (600 MHz,  $\text{CDCl}_3$ ):  $\delta$  7.52 – 7.50 (m, 2 H), 7.38 – 7.31 (m, 8 H), 5.09 (s, 2 H), 2.29 – 2.26 (m, 2 H), 1.68 – 1.65 (m, 2 H), 0.87 (s, 6 H), and 0.30 (s, 6 H).

$^{13}\text{C}$  NMR (151 MHz,  $\text{CDCl}_3$ ):  $\delta$  174.6, 137.3, 136.2, 134.7, 129.1, 128.7, 128.7, 128.3, 127.7, 66.3, 33.2, 28.7, 22.5, 19.4, and  $-5.7$ .

**HRMS** ( $m/z$ ): calcd for  $\text{C}_{21}\text{H}_{28}\text{NaO}_2\text{Si}$  [ $\text{M}+\text{Na}$ ] $^+$ : 363.1751, found: 363.1753.

**IR** (film)  $\nu_{\text{max}}$ : 3069, 2956, 2861, 1733, 1459, 1427, 1382, 1285, 1252, 1252, 1215, 1164, 1109, 1073, 1015, and  $738\text{ cm}^{-1}$ .

**TLC**:  $R_f = 0.40$  (20:1 hexanes:EtOAc).

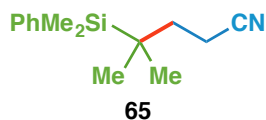

**4-(Dimethyl(phenyl)silyl)-4-methylpentanenitrile (65).**

Following the general procedure, a mixture of dimethyl(phenyl)(prop-1-en-2-yl)silane<sup>25</sup> (17.6 mg, 100  $\mu\text{mol}$ , 1.0 equiv), acrylonitrile (19.7  $\mu\text{L}$ , 300  $\mu\text{mol}$ , 3.0 equiv),  $\text{Na}_2\text{HPO}_4$  (14.2 mg, 100  $\mu\text{mol}$ , 1.0 equiv),  $\text{Fe}(\text{acac})_3$  (17.7 mg, 50.0  $\mu\text{mol}$ , 50 mol %), and  $\text{PhSiH}_3$  (25.0  $\mu\text{L}$ , 200  $\mu\text{mol}$ , 3.0 equiv) in *n*-PrOH (0.50 mL) was heated at  $80\text{ }^\circ\text{C}$  with stirring for 1 h. Purification by flash column chromatography ( $\text{SiO}_2$ , 3:1 hexanes:EtOAc) furnished silane **65** as a pale yellow oil (19.5 mg, 84.2  $\mu\text{mol}$ , 84%).

**Physical State:** pale yellow oil.

**<sup>1</sup>H NMR** (600 MHz, CDCl<sub>3</sub>): δ 7.51 – 7.49 (m, 2 H), 7.39 – 7.36 (m, 3 H), 2.20 – 2.17 (m, 2 H), 1.71 – 1.69 (m, 2 H), 0.91 (s, 6 H), and 0.31 (s, 6 H).

**<sup>13</sup>C NMR** (151 MHz, CDCl<sub>3</sub>): δ 136.5, 134.6, 129.4, 127.9, 121.0, 34.2, 22.0, 19.7, 11.4, and – 6.0.

**HRMS (*m/z*):** calcd for C<sub>14</sub>H<sub>21</sub>NNaSi [M+Na]<sup>+</sup>: 254.1336, found: 254.1346.

**IR (film) *v*<sub>max</sub>:** 3070, 2957, 2863, 2245, 1464, 1427, 1252, 1109, 1081, 1015, and 737 cm<sup>-1</sup>.

**TLC:** R<sub>f</sub> = 0.60 (10:1 hexanes:EtOAc).

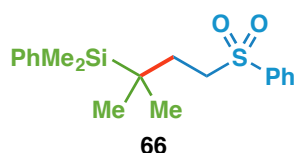

**Dimethyl(2-methyl-4-(phenylsulfonyl)butan-2-yl)(phenyl)silane**

**(66).** Following the general procedure, a mixture of dimethyl(phenyl)(prop-1-en-2-yl)silane<sup>25</sup> (17.6 mg, 100 μmol, 1.0 equiv), phenyl vinyl sulfone (50.5 mg, 300 μmol, 3.0 equiv), Fe(acac)<sub>3</sub> (17.7 mg, 50.0 μmol, 100 mol %), and PhSiH<sub>3</sub> (25.0 μL, 200 μmol, 2.0 equiv) in *n*-PrOH (0.50 mL) was heated at 80 °C with stirring for 1 h. Purification by flash column chromatography (SiO<sub>2</sub>, 5:1 hexanes:EtOAc) furnished silane **66** as a white solid (12.3 mg, 35.4 μmol, 35%).

**Physical State:** white solid.

**Melting point:** 112.0–114.0 °C

**<sup>1</sup>H NMR** (600 MHz, CDCl<sub>3</sub>): δ 7.84 – 7.82 (m, 2 H), 7.65 – 7.62 (m, 1 H), 7.55 – 7.52 (m, 2 H), 7.42 – 7.40 (m, 2 H), 7.37 – 7.34 (m, 1 H), 7.33 – 7.30 (m, 2 H), 2.95 – 2.93 (m, 2 H), 1.69 – 1.66 (m, 2 H), 0.82 (s, 6 H), and 0.25 (s, 6 H).

**<sup>13</sup>C NMR** (151 MHz, CDCl<sub>3</sub>): δ 139.3, 136.6, 134.5, 133.7, 129.3, 129.3, 128.1, 127.9, 51.7, 30.6, 22.7, 19.2, and –5.9.

**HRMS (*m/z*):** calcd for C<sub>19</sub>H<sub>26</sub>NaO<sub>2</sub>SSi [M+Na]<sup>+</sup>: 369.1315, found: 369.1312.

**IR (film) *v*<sub>max</sub>:** 3278, 3268, 2927, 1300, 1256, 1147, 1087, 913, 817, 741, 689, 533, 438, and 419 cm<sup>-1</sup>.

**TLC:** R<sub>f</sub> = 0.40 (5:1 hexanes:EtOAc).

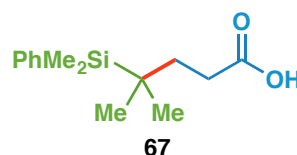

**4-(Dimethyl(phenyl)silyl)-4-methylpentanoic acid (67).** Omitting Na<sub>2</sub>HPO<sub>4</sub> from the general procedure, a mixture of dimethyl(phenyl)(prop-1-en-2-yl)silane<sup>25</sup> (17.6 mg, 100 μmol, 1.0

equiv), acrylic acid (21.0  $\mu\text{L}$ , 300  $\mu\text{mol}$ , 3.0 equiv),  $\text{Fe}(\text{acac})_3$  (17.7 mg, 50.0  $\mu\text{mol}$ , 50 mol %), and  $\text{PhSiH}_3$  (25.0  $\mu\text{L}$ , 200  $\mu\text{mol}$ , 2.0 equiv) in *n*-PrOH (0.50 mL) was heated at 80  $^\circ\text{C}$  with stirring for 1 h. Purification by flash column chromatography ( $\text{SiO}_2$ , 3:1 DCM:MeOH) furnished silane **67** as a white solid (13.3 mg, 53.1  $\mu\text{mol}$ , 53%).

**Physical State:** white solid.

**$^1\text{H}$  NMR** (600 MHz,  $\text{CDCl}_3$ ):  $\delta$  7.52 – 7.50 (m, 2 H), 7.37 – 7.33 (m, 3 H), 2.26 – 2.24 (m, 2 H), 1.66 – 1.63 (m, 2 H), 0.88 (s, 6 H), and 0.30 (s, 6 H).

**$^{13}\text{C}$  NMR** (151 MHz,  $\text{CDCl}_3$ ):  $\delta$  180.1, 137.3, 134.7, 129.1, 127.7, 33.1, 28.4, 22.5, 19.4, and –5.7.

**HRMS** ( $m/z$ ): calcd for  $\text{C}_{14}\text{H}_{22}\text{NaOSi}$  [ $\text{M}+\text{Na}$ ] $^+$ : 273.1821, found: 273.1290.

**IR** (film)  $\nu_{\text{max}}$ : 3071, 2956, 2930, 2861, 1711, 1462, 1428, 1293, 1252, 1134, 1109, 909, and 817  $\text{cm}^{-1}$ .

**TLC:**  $R_f$  = 0.25 (50:1 DCM:MeOH).

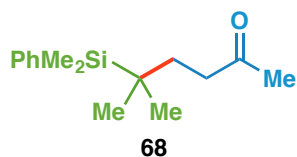

**5-(Dimethyl(phenyl)silyl)-5-methylhexan-2-one (68).** Following the general procedure, a mixture of dimethyl(phenyl)(prop-1-en-2-yl)silane<sup>25</sup> (17.6 mg, 100  $\mu\text{mol}$ , 1.0 equiv), methyl vinyl ketone (49.0  $\mu\text{L}$ , 600  $\mu\text{mol}$ , 6.0 equiv),  $\text{Na}_2\text{HPO}_4$  (14.2 mg, 100  $\mu\text{mol}$ , 1.0 equiv),  $\text{Fe}(\text{acac})_3$  (17.7 mg, 50.0  $\mu\text{mol}$ , 50 mol %), and  $\text{PhSiH}_3$  (25.0  $\mu\text{L}$ , 200  $\mu\text{mol}$ , 2.0 equiv) in *n*-PrOH (0.50 mL) was heated at 80  $^\circ\text{C}$  with stirring for 1 h. Purification by flash column chromatography ( $\text{SiO}_2$ , 10:1 hexanes:EtOAc) furnished silane **68** as a pale yellow oil (14.8 mg, 59.5  $\mu\text{mol}$ , 60%).

**Physical State:** pale yellow oil.

**$^1\text{H}$  NMR** (600 MHz,  $\text{CDCl}_3$ ):  $\delta$  7.52 – 7.50 (m, 2 H), 7.37 – 7.33 (m, 3 H), 2.32 – 2.29 (m, 2 H), 2.08 (s, 3 H), 1.57 – 1.55 (m, 2 H), 0.87 (s, 6 H), and 0.30 (s, 6 H).

**$^{13}\text{C}$  NMR** (151 MHz,  $\text{CDCl}_3$ ):  $\delta$  210.0, 137.5, 134.7, 129.1, 127.7, 38.1, 32.1, 30.1, 22.5, 19.3, and –5.7.

**HRMS** ( $m/z$ ): calcd for  $\text{C}_{15}\text{H}_{24}\text{NaOSi}$  [ $\text{M}+\text{Na}$ ] $^+$ : 271.1487, found: 271.1489.

**IR** (film)  $\nu_{\text{max}}$ : 2956, 2860, 1714, 1466, 1427, 1361, 1251, 1134, 1111, 1069, 909, 818, and 770  $\text{cm}^{-1}$ .

**TLC:**  $R_f$  = 0.45 (10:1 hexanes:EtOAc).



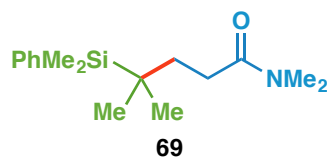

#### 4-(Dimethyl(phenyl)silyl)-*N,N*,4-trimethylpentanamide (69).

Following the general procedure, a mixture of dimethyl(phenyl)(prop-1-en-2-yl)silane<sup>25</sup> (17.6 mg, 100  $\mu\text{mol}$ , 1.0 equiv), *N,N*-dimethylacrylamide (31.0  $\mu\text{L}$ , 300  $\mu\text{mol}$ , 3.0 equiv),  $\text{Na}_2\text{HPO}_4$  (14.2 mg, 100  $\mu\text{mol}$ , 1.0 equiv),  $\text{Fe}(\text{acac})_3$  (17.7 mg, 50.0  $\mu\text{mol}$ , 50 mol %), and  $\text{PhSiH}_3$  (25.0  $\mu\text{L}$ , 200  $\mu\text{mol}$ , 2.0 equiv) in *n*-PrOH (0.50 mL) was heated at 80  $^\circ\text{C}$  with stirring for 1 h. Purification by flash column chromatography ( $\text{SiO}_2$ , 3:1 hexanes:EtOAc) furnished silane **69** as pale yellow oil (19.4 mg, 69.9  $\mu\text{mol}$ , 70%).

**Physical State:** pale yellow oil.

**$^1\text{H}$  NMR** (600 MHz,  $\text{CDCl}_3$ ):  $\delta$  7.52 – 7.51 (m, 2 H), 7.37 – 7.33 (m, 3 H), 2.90 (s, 3 H), 2.86 (s, 3 H) 2.19 – 2.16 (m, 2 H), 1.64 – 1.62 (m, 2 H), 0.91 (s, 6 H), and 0.30 (s, 6 H).

**$^{13}\text{C}$  NMR** (151 MHz,  $\text{CDCl}_3$ ):  $\delta$  174.0, 137.8, 134.7, 128.9, 127.7, 37.3, 33.6, 27.8, 22.9, 22.9, 19.6, and –5.7.

**HRMS (*m/z*):** calcd for  $\text{C}_{16}\text{H}_{27}\text{NNaOSi}$  [ $\text{M}+\text{Na}$ ]<sup>+</sup>: 300.1754, found: 300.1754.

**IR (film)  $\nu_{\text{max}}$ :** 2928, 2859, 1727, 1647, 1464, 1427, 1396, 1251, 1133, 1110, 830, and 815  $\text{cm}^{-1}$ .

**TLC:**  $R_f$  = 0.20 (3:1 hexanes:EtOAc).

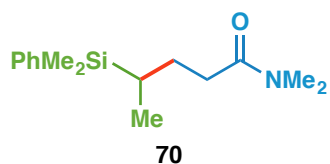

#### 4-(Dimethyl(phenyl)silyl)-*N,N*-dimethylpentanamide (70).

Following the general procedure, a mixture of dimethyl(phenyl)(vinyl)silane<sup>26</sup> (16.2 mg, 100  $\mu\text{mol}$ , 1.0 equiv), *N,N*-dimethylacrylamide (62.0  $\mu\text{L}$ , 600  $\mu\text{mol}$ , 6.0 equiv),  $\text{Na}_2\text{HPO}_4$  (14.2 mg, 100  $\mu\text{mol}$ , 1.0 equiv),  $\text{Fe}(\text{acac})_3$  (17.7 mg, 50.0  $\mu\text{mol}$ , 50 mol %), and  $\text{PhSiH}_3$  (25.0  $\mu\text{L}$ , 200  $\mu\text{mol}$ , 2.0 equiv) in *n*-PrOH (0.50 mL) was heated at 80  $^\circ\text{C}$  with stirring for 1 h. Purification by flash column chromatography ( $\text{SiO}_2$ , 2:1 PhMe:EtOAc) furnished silane **70** as a pale yellow oil (13.3 mg, 50.5  $\mu\text{mol}$ , 51%).

**Physical State:** pale yellow oil.

**$^1\text{H}$  NMR** (600 MHz,  $\text{CDCl}_3$ ):  $\delta$  7.51 – 7.49 (m, 2 H), 7.35 – 7.32 (m, 3 H), 2.90 (s, 3 H), 2.87 (s, 3 H), 2.42 – 2.37 (m, 1 H), 2.18 – 2.13 (m, 1 H), 1.86 – 1.82 (m, 1 H), 1.46 – 1.35 (m, 1 H), 0.96 (d,  $J$  = 7.2 Hz, 3 H), 0.92 – 0.87 (m, 1 H), 0.27 (s, 3 H), and 0.26 (s, 3 H).

**$^{13}\text{C}$  NMR** (151 MHz,  $\text{CDCl}_3$ ):  $\delta$  173.5, 134.1, 129.0, 128.9, 127.8, 37.3, 35.5, 32.8, 27.4, 19.4, 14.2, –4.6, and –5.0.

**HRMS (*m/z*):** calcd for C<sub>15</sub>H<sub>26</sub>NOSi [M+H]<sup>+</sup>: 264.1778, found: 264.1779.

**IR (film)  $\nu_{\text{max}}$ :** 2928, 2013, 1979, 1368, 1398, 1251, 1112, 911, 816, 734, and 670 cm<sup>-1</sup>.

**TLC:** R<sub>f</sub> = 0.45 (2:1 PhMe:EtOAc).

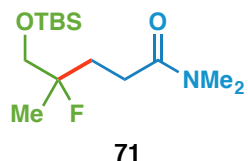

**5-((*tert*-Butyldimethylsilyloxy)-4-fluoro-*N,N*,4-trimethylpentanamide**

**(71).** Following the general procedure, a mixture of **S5** (30.0 mg, 158  $\mu\text{mol}$ , 1.0 equiv), *N,N*-dimethylacrylamide (48.7  $\mu\text{L}$ , 473  $\mu\text{mol}$ , 3.0 equiv), Na<sub>2</sub>HPO<sub>4</sub> (22.4 mg, 158  $\mu\text{mol}$ , 1.0 equiv), Fe(acac)<sub>3</sub> (55.7 mg, 158  $\mu\text{mol}$ , 100 mol %), and PhSiH<sub>3</sub> (58.3  $\mu\text{L}$ , 473  $\mu\text{mol}$ , 3.0 equiv) in EtOH (0.53 mL) was heated at 60 °C with stirring for 1 h. Purification by flash column chromatography (SiO<sub>2</sub>, 7:3 hexanes:EtOAc) furnished fluoride **71** as a pale yellow oil (22.2 mg, 76.2  $\mu\text{mol}$ , 48%).

**Physical State:** pale yellow oil.

**<sup>1</sup>H NMR** (600 MHz, CDCl<sub>3</sub>):  $\delta$  3.62 – 3.55 (m, 2 H), 3.02 (s, 3 H), 2.94 (s, 3 H), 2.48 – 2.40 (m, 2 H), 2.07 – 2.89 (m, 2 H), 1.30 (d, *J* = 21.8 Hz, 3 H), 0.89 (s, 9 H), 0.06 (s, 3 H), and 0.06 (s, 3 H).

**<sup>13</sup>C NMR** (151 MHz, CDCl<sub>3</sub>):  $\delta$  172.7, 96.6 (d, *J* = 171.5 Hz), 68.5 (d, *J* = 28.6), 37.4, 35.6, 31.8 (d, *J* = 21.7 Hz), 27.4, 26.0, 21.5 (d, *J* = 24.1 Hz), 18.4, –5.29, and –5.34.

**<sup>19</sup>F NMR** (376 MHz, CDCl<sub>3</sub>):  $\delta$  –156.6.

**HRMS (*m/z*):** calcd for C<sub>14</sub>H<sub>31</sub>FNO<sub>2</sub>Si [M+H]<sup>+</sup>: 292.2103, found: 292.2105.

**IR (film)  $\nu_{\text{max}}$ :** 2952, 2930, 2857, 1649, 1462, 1397, 1361, 1254, 1103, 837, 778, and 670 cm<sup>-1</sup>.

**TLC:** R<sub>f</sub> = 0.27 (7:3 hexanes:EtOAc).

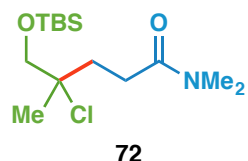

**5-((*tert*-Butyldimethylsilyloxy)-4-chloro-*N,N*,4-trimethylpentanamide**

**(72).** Following the general procedure, a mixture of **S6** (30.0 mg, 145  $\mu\text{mol}$ , 1.0 equiv), *N,N*-dimethylacrylamide (44.9  $\mu\text{L}$ , 435  $\mu\text{mol}$ , 3.0 equiv), Na<sub>2</sub>HPO<sub>4</sub> (20.6 mg, 145  $\mu\text{mol}$ , 1.0 equiv), Fe(acac)<sub>3</sub> (51.2 mg, 145  $\mu\text{mol}$ , 100 mol %), and PhSiH<sub>3</sub> (53.6  $\mu\text{L}$ , 435  $\mu\text{mol}$ , 3.0 equiv) in EtOH (0.73 mL) was heated at 60 °C with stirring for 1 h. Purification by flash column chromatography (SiO<sub>2</sub>, 7:3 hexanes:EtOAc) furnished chloride **72** as a pale yellow oil (26.9 mg, 87.4  $\mu\text{mol}$ , 60%).

**Physical State:** pale yellow oil.

**<sup>1</sup>H NMR** (600 MHz, CDCl<sub>3</sub>): δ 3.67 (d, *J* = 10.1 Hz, 1 H), 3.61 (d, *J* = 10.1 Hz, 1 H), 3.03 (s, 3 H), 2.95 (s, 3 H), 2.52 (m, 2 H), 2.11 (m, 2 H), 1.51 (s, 3 H), 0.89 (s, 9 H), 0.07 (s, 3 H), and 0.07 (s, 3 H).

**<sup>13</sup>C NMR** (151 MHz, CDCl<sub>3</sub>): δ 172.6, 72.6, 71.2, 37.4, 35.6, 28.9, 27.1, 26.0, 18.4, -5.27, and -5.32.

**HRMS (*m/z*)**: calcd for C<sub>14</sub>H<sub>31</sub>ClNO<sub>2</sub>Si [M+H]<sup>+</sup>: 308.1807, found: 308.1807.

**IR (film) *v*<sub>max</sub>**: 2952, 2929, 2857, 1650, 1462, 1397, 1361, 1255, 1098, 1075, 837, 777, and 671 cm<sup>-1</sup>.

**TLC**: R<sub>f</sub> = 0.35 (7:3 hexanes:EtOAc).

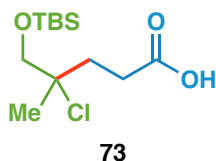

**5-((*tert*-Butyltrimethylsilyloxy)-4-chloro-4-methylpentanoic acid (73).**

Omitting Na<sub>2</sub>HPO<sub>4</sub> from the general procedure, a mixture of **S5** (30.0 mg, 145 μmol, 1.0 equiv), acrylic acid (29.8 μL, 435 μmol, 3.0 equiv), Fe(acac)<sub>3</sub> (51.2 mg, 145 μmol, 100 mol %), and PhSiH<sub>3</sub> (53.7 μL, 435 μmol, 3.0 equiv) in EtOH (0.73 mL) was heated at 60 °C with stirring for 1 h. Purification by flash column chromatography (SiO<sub>2</sub>, 8:2 hexanes:EtOAc), followed by preparative TLC (SiO<sub>2</sub>, 7:3 hexanes:EtOAc) furnished chloride **73** as a pale yellow oil (18.9 mg, 67.3 μmol, 46%).

**Physical State**: pale yellow oil.

**<sup>1</sup>H NMR** (600 MHz, CDCl<sub>3</sub>): δ 3.66 (d, *J* = 10.1 Hz, 1 H), 3.60 (d, *J* = 10.0 Hz, 1 H), 2.58 – 2.46 (m, 2 H), 2.15 (ddd, *J* = 7.5, 8.6, 14.5 Hz, 1 H), 2.09 (ddd, *J* = 6.7, 9.6, 14.5 Hz, 1 H), 1.52 (s, 3 H), 0.90 (s, 9 H), 0.07 (s, 3 H), and 0.07 (s, 3 H).

**<sup>13</sup>C NMR** (151 MHz, CDCl<sub>3</sub>): δ 178.6, 71.4, 70.7, 34.9, 29.5, 27.2, 25.9, 18.4, -5.31, and -5.35.

**HRMS (*m/z*)**: calcd for C<sub>12</sub>H<sub>26</sub>ClO<sub>3</sub>Si [M+H]<sup>+</sup>: 281.1334, found: 281.1337.

**IR (film) *v*<sub>max</sub>**: 2953, 2930, 2857, 1710, 1459, 1418, 1254, 1099, 1080, 834, 776, and 671 cm<sup>-1</sup>.

**TLC**: R<sub>f</sub> = 0.31 (8:2 hexanes:EtOAc).

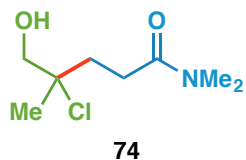

**4-Chloro-5-hydroxy-N,N,4-trimethylpentanamide (74).**

Following the general procedure, a mixture of 2-chloro-2-propen-1-ol (30.0 mg, 324 μmol, 1.0 equiv), *N,N*-dimethylacrylamide (100 μL, 973 μmol, 3.0 equiv), Na<sub>2</sub>HPO<sub>4</sub> (46.0 mg, 324 μmol, 1.0 equiv), Fe(acac)<sub>3</sub> (115 mg, 324 μmol, 100 mol %), and PhSiH<sub>3</sub> (120 μL, 973 μmol, 3.0 equiv) in EtOH (1.6 mL) was heated at 60 °C

with stirring for 1 h. Purification by flash column chromatography (SiO<sub>2</sub>, EtOAc), followed by preparative TLC (SiO<sub>2</sub>, 95:5 DCM:MeOH) furnished chloride **74** as a pale yellow oil (42.1 mg, 217 μmol, 67%).

**Physical State:** pale yellow oil.

**<sup>1</sup>H NMR** (600 MHz, CDCl<sub>3</sub>): δ 4.29 (dd, *J* = 6.0, 9.1 Hz, 1 H), 3.48 – 3.42 (m, 2 H), 3.05 (s, 3 H), 2.98 (s, 3 H), 2.68 (ddd, *J* = 4.3, 8.9, 17.5 Hz, 1 H), 2.46 – 2.39 (m, 2 H), 1.91 (dddd, *J* = 0.8, 4.3, 7.5, 15.4 Hz, 1 H), and 1.63 (s, 3 H).

**<sup>13</sup>C NMR** (151 MHz, CDCl<sub>3</sub>): δ 173.3, 73.9, 68.6, 37.4, 36.0, 33.7, 28.6, and 28.5.

**HRMS (*m/z*):** calcd for C<sub>8</sub>H<sub>17</sub>ClNO<sub>2</sub> [M+H]<sup>+</sup>: 194.0942, found: 194.0943.

**IR (film) ν<sub>max</sub>:** 3375 (br), 2971, 2934, 1608, 1503, 1455, 1405, 1262, 1150, 1045, and 912 cm<sup>-1</sup>.

**TLC:** R<sub>f</sub> = 0.40 (EtOAc).

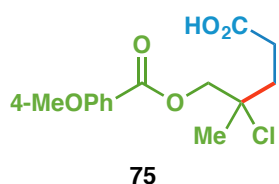

**4-Chloro-5-((4-methoxybenzoyl)oxy)-4-methylpentanoic acid (75).**

Omitting Na<sub>2</sub>HPO<sub>4</sub> from the general procedure, a mixture of 2-chloroallyl 4-methoxybenzoate<sup>4</sup> (22.6 mg, 100 μmol, 1.0 equiv), acrylic acid (20.6 μL, 300 μmol, 3.0 equiv), Fe(acac)<sub>3</sub> (35.3 mg, 100 μmol, 100 mol %), and PhSiH<sub>3</sub> (36.9 μL, 300 μmol, 3.0 equiv) in EtOH (0.50 mL) was heated to 60 °C with stirring for 1 h. Purification by flash column chromatography (SiO<sub>2</sub>, 2:1→1:2 hexanes:EtOAc) furnished chloride **75** as a colorless oil (14.9 mg, 49.6 μmol, 50%).

**Physical State:** colorless oil.

**<sup>1</sup>H NMR** (600 MHz, CDCl<sub>3</sub>): δ 8.00 (d, *J* = 9.0 Hz, 2 H), 6.94 (d, *J* = 9.0 Hz, 2 H), 4.39 (s, 2 H), 3.86 (s, 3H), 2.71 – 2.61 (m, 2 H), 2.29 – 2.24 (m, 1 H), 2.20 – 2.15 (m, 1 H), and 1.65 (s, 3 H).

**<sup>13</sup>C NMR** (151 MHz, CDCl<sub>3</sub>): δ 178.2, 165.7, 163.8, 131.9, 122.0, 113.9, 70.7, 68.9, 55.6, 35.5, 29.4, and 27.4.

**HRMS (*m/z*):** calcd for C<sub>14</sub>H<sub>18</sub>ClO<sub>5</sub> [M+H]<sup>+</sup>: 301.0837, found: 301.0830.

**IR (film) ν<sub>max</sub>:** 2934, 1706, 1604, 1252, 1165, 1097, and 729 cm<sup>-1</sup>.

**TLC:** R<sub>f</sub> = 0.50 (1:2 hexanes:EtOAc).

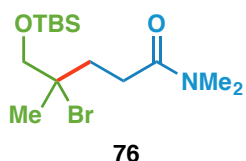

**4-Bromo-5-((tert-butyldimethylsilyl)oxy)-N,N,4-trimethylpentanamide (76).**

A solution of *N,N*-dimethylacrylamide (62.0 μL, 600 μmol, 6.0 equiv), and PhSiH<sub>3</sub> (73.8 μL, 600 μmol, 6.0 equiv) in EtOH (0.50 mL) was added

slowly via syringe pump to a mixture of ((2-bromoallyl)oxy)(*tert*-butyl)dimethylsilane<sup>27</sup> (25.0 mg, 100  $\mu$ mol, 1.0 equiv), Na<sub>2</sub>HPO<sub>4</sub> (14.2 mg, 100  $\mu$ mol, 1.0 equiv), and Fe(acac)<sub>3</sub> (35.3 mg, 100  $\mu$ mol, 100 mol %) in EtOH (0.50 mL) while heating at 60 °C with stirring for 1 h. After work up following the general procedure, purification by flash column chromatography (SiO<sub>2</sub>, 5:1→3:1 hexanes:EtOAc) furnished bromide **76** as a colorless oil (14.8 mg, 42.4  $\mu$ mol, 42%).

**Physical State:** colorless oil.

**<sup>1</sup>H NMR** (600 MHz, CDCl<sub>3</sub>):  $\delta$  3.77 (d,  $J$  = 10.2 Hz, 1 H), 3.71 (d,  $J$  = 10.2 Hz, 1 H), 3.05 (s, 3 H), 2.95 (s, 3 H), 2.61 – 2.56 (m, 1 H), 2.54 – 2.49 (m, 1 H), 2.20 – 2.11 (m, 2 H), 1.71 (s, 3 H), 0.89 (s, 9 H), 0.07 (s, 3 H), and 0.07 (s, 3 H).

**<sup>13</sup>C NMR** (151 MHz, CDCl<sub>3</sub>):  $\delta$  172.4, 71.8, 70.6, 37.4, 36.7, 35.6, 30.3, 28.5, 26.0, 18.4, and – 5.3.

**HRMS ( $m/z$ ):** calcd for C<sub>14</sub>H<sub>31</sub>BrNO<sub>2</sub>Si [M+H]<sup>+</sup>: 352.1302, found: 352.1308.

**IR (film)  $\nu_{\max}$ :** 2929, 2856, 1650, 1463, 1091, 838, 777 and 671 cm<sup>-1</sup>.

**TLC:** R<sub>f</sub> = 0.45 (2:1 hexanes:EtOAc).

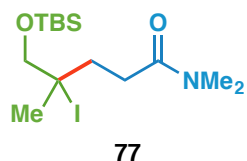

**5-((*tert*-Butyldimethylsilyl)oxy)-4-iodo-*N,N*,4-trimethylpentanamide**

**(77).** A solution of *N,N*-dimethylacrylamide (62.0  $\mu$ L, 600  $\mu$ mol, 6.0 equiv), and PhSiH<sub>3</sub> (73.8  $\mu$ L, 600  $\mu$ mol, 6.0 equiv) in EtOH (0.50 mL) was added slowly via syringe pump to a mixture of *tert*-butyl((2-iodoallyl)oxy)dimethylsilane<sup>28</sup> (29.8 mg, 100  $\mu$ mol, 1.0 equiv), Na<sub>2</sub>HPO<sub>4</sub> (14.2 mg, 100  $\mu$ mol, 1.0 equiv), and Fe(acac)<sub>3</sub> (35.3 mg, 100  $\mu$ mol, 100 mol %) in EtOH (0.50 mL) while heating at 60 °C with stirring for 1 h. After work up following the general procedure, purification by flash column chromatography (SiO<sub>2</sub>, 5:1→4:1 hexanes:EtOAc) furnished iodide **77** as a colorless oil (14.6 mg, 36.6  $\mu$ mol, 37%).

**Physical State:** colorless oil.

**<sup>1</sup>H NMR** (600 MHz, CDCl<sub>3</sub>):  $\delta$  3.76 (d,  $J$  = 10.2 Hz, 1 H), 3.71 (d,  $J$  = 10.2 Hz, 1 H), 3.06 (s, 3H), 2.95 (s, 3H), 2.61 – 2.56 (m, 1 H), 2.53 – 2.47 (m, 1 H), 2.10 – 2.04 (m, 1 H), 1.97 – 1.94 (m, 1 H), 1.90 (s, 3 H), 0.90 (s, 9 H), 0.07 (s, 3 H), and 0.07 (s, 3 H).

**<sup>13</sup>C NMR** (151 MHz, CDCl<sub>3</sub>):  $\delta$  172.3, 74.1, 57.3, 39.0, 37.4, 35.6, 32.7, 31.6, 26.0, 18.4, and – 5.2.

**HRMS ( $m/z$ ):** calcd for C<sub>14</sub>H<sub>31</sub>INO<sub>2</sub>Si [M+H]<sup>+</sup>: 400.1163, found: 400.1171.

**IR (film)  $\nu_{\max}$ :** 2928, 2856, 1646, 1462, 1092, 834, 776 and 670  $\text{cm}^{-1}$ .

**TLC:**  $R_f = 0.55$  (2:1 hexanes:EtOAc).

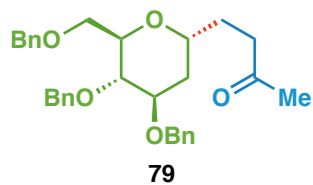

**4-((2R,4R,5S,6R)-4,5-Bis(benzyloxy)-6-**

**((benzyloxy)methyl)tetrahydro-2H-pyran-2-yl)butan-2-one (79).** A

solution of methyl vinyl ketone (49.6  $\mu\text{L}$ , 600  $\mu\text{mol}$ , 12.0 equiv) and  $\text{PhSiH}_3$  (73.8  $\mu\text{L}$ , 600  $\mu\text{mol}$ , 12.0 equiv) in EtOH (0.25 mL) was added slowly via syringe pump to a mixture of 3,4,6-tri-O-methyl-D-glucal (20.8 mg, 50.0  $\mu\text{mol}$ , 1.0 equiv),  $\text{Na}_2\text{HPO}_4$  (7.1 mg, 50.0  $\mu\text{mol}$ , 1.0 equiv),  $\text{Fe}(\text{dibm})_3$  (7.9 mg, 15  $\mu\text{mol}$ , 30 mol %) in EtOH (0.25 mL) while heating at 60  $^\circ\text{C}$  with stirring for 2 h. After work up following the general procedure, purification by preparative TLC ( $\text{SiO}_2$ , 3:1 hexanes:EtOAc) furnished glucal derivative **79** as a colorless oil (16.7 mg, 34.1  $\mu\text{mol}$ , 68%) and recovered starting material (5.1 mg, 12.2  $\mu\text{mol}$ , 24%).

Spectroscopic data was identical to that reported in the literature.<sup>29</sup>

**Physical State:** colorless oil.

$[\alpha]_{20}^D$ : +28.2 ( $c = 0.50$ ,  $\text{CHCl}_3$ ).

**$^1\text{H NMR}$**  (600 MHz,  $\text{CDCl}_3$ ):  $\delta$  7.33 – 7.26 (m, 13 H), 7.21 – 7.20 (m, 2 H), 4.78 (d,  $J = 10.8$  Hz, 1 H), 4.60 (d,  $J = 11.4$  Hz, 1 H), 4.58 (d,  $J = 11.4$  Hz, 1 H), 4.56 (d,  $J = 12.6$  Hz, 1 H), 4.52 (d,  $J = 10.8$  Hz, 1 H), 4.51 (d,  $J = 12.0$  Hz, 1 H), 3.96 – 3.93 (m, 1 H), 3.82 – 3.78 (m, 1 H), 3.75 – 3.69 (m, 2 H), 3.66 – 3.63 (m, 1 H), 3.49 (dd,  $J = 7.2, 7.2$  Hz, 1 H), 2.59 – 2.54 (m, 1 H), 2.51 – 2.45 (m, 1 H), 2.12 (s, 3 H), 1.99 – 1.94 (m, 2 H), 1.83 – 1.78 (m, 1 H), and 1.68 – 1.63 (m, 1 H).

**$^1\text{H NMR}$**  (600 MHz,  $\text{C}_6\text{D}_6$ ):  $\delta$  7.30 – 7.10 (m, 15 H), 4.75 (d,  $J = 11.4$  Hz, 1 H), 4.54 (d,  $J = 11.4$  Hz, 1 H), 4.44 – 4.33 (m, 4 H), 3.91 – 3.72 (m, 5 H), 3.56 (dd,  $J = 6.6, 6.6$  Hz, 1 H), 2.23 – 2.10 (m, 2 H), 1.88 – 1.83 (m, 1 H), 1.78 – 1.74 (m, 1 H), 1.68 (s, 3 H), 1.67 – 1.64 (m, 1 H), and 1.55 – 1.52 (m, 1 H).

**$^{13}\text{C NMR}$**  (151 MHz,  $\text{CDCl}_3$ ):  $\delta$  208.6, 138.6, 138.5, 138.4, 128.5, 128.5, 128.0, 127.9, 127.8, 127.7, 76.9, 76.7, 74.1, 73.5, 72.6, 71.6, 70.2, 69.2, 39.8, 33.7, 30.3, and 25.9.

**HRMS ( $m/z$ ):** calcd for  $\text{C}_{31}\text{H}_{37}\text{O}_5$   $[\text{M}+\text{H}]^+$ : 489.2636, found: 489.2646.

**IR (film)  $\nu_{\max}$ :** 2924, 1711, 1452, 1360, 1092, 734 and 695  $\text{cm}^{-1}$ .

**TLC:**  $R_f = 0.21$  (3:1 hexanes:EtOAc).

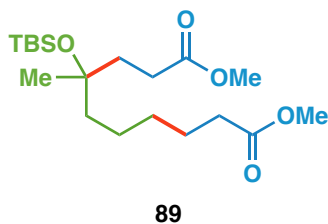

**Dimethyl 4-((*tert*-butyldimethylsilyl)oxy)-4-methyldecanedioate (89).** Following the general procedure, a mixture of *tert*-butyl((1-cyclopropylvinyl)oxy)dimethylsilane<sup>30</sup> (65.0 mg, 331  $\mu$ mol, 3.0 equiv), methyl acrylate (10.0  $\mu$ L, 110  $\mu$ mol, 1.0 equiv), Na<sub>2</sub>HPO<sub>4</sub> (15.7 mg, 110  $\mu$ mol, 1.0 equiv), Fe(dibm)<sub>3</sub> (2.9 mg, 5.5  $\mu$ mol, 5 mol %), and PhSiH<sub>3</sub> (27.2  $\mu$ L, 221  $\mu$ mol, 2.0 equiv) in EtOH (0.55 mL) was heated at 60 °C with stirring for 1 h. Purification by preparative TLC (SiO<sub>2</sub>, 95:5 hexanes:EtOAc) furnished silyl ether **89** as a pale yellow oil (2.5 mg, 6.71  $\mu$ mol, 6%).

**Physical State:** pale yellow oil.

**<sup>1</sup>H NMR** (600 MHz, CDCl<sub>3</sub>):  $\delta$  3.68 (s, 3 H), 3.62 (s, 3 H), 2.78 (dd,  $J = 7.1, 7.1$  Hz, 1 H), 2.43 (ddd,  $J = 16.0, 11.2, 5.1$  Hz, 1 H), 2.35 (ddd,  $J = 15.7, 11.3, 5.5$  Hz, 1 H), 2.08 (ddd,  $J = 13.4, 6.8, 6.8$  Hz, 1 H), 2.03 – 1.83 (m, 6 H), 1.84 – 1.71 (m, 2 H), 1.69 – 1.59 (m, 2 H), 1.15 (s, 3 H), 0.86 (s, 9 H), 0.09 (s, 3 H), and 0.07 (s, 3 H).

**<sup>13</sup>C NMR** (151 MHz, CDCl<sub>3</sub>):  $\delta$  176.6, 174.6, 76.0, 55.4, 53.6, 51.8, 51.4, 44.6, 36.7, 30.3, 29.2, 26.1, 24.9, 24.5, 22.5, -1.68, and -1.72.

**HRMS ( $m/z$ )** calcd for C<sub>19</sub>H<sub>39</sub>O<sub>5</sub>Si [M+H]<sup>+</sup>: 375.2561, found: 375.2569.

**IR (film)**  $\nu_{\max}$ : 2953, 2930, 2855, 1735, 1458, 1434, 1378, 1193, 1163, 1109, and 1015 cm<sup>-1</sup>.

**TLC:** R<sub>f</sub> = 0.60 (9:1 hexanes:EtOAc).

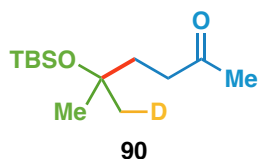

**5-((*tert*-Butyldimethylsilyl)oxy)-5-methylhexan-2-one-6-d (90).**

Following the general procedure, a mixture of *tert*-butyldimethyl(prop-1-en-2-yloxy)silane<sup>5</sup> (17.3 mg, 100  $\mu$ mol, 1.0 equiv), methyl vinyl ketone (24.9  $\mu$ L, 300  $\mu$ mol, 3.0 equiv), Na<sub>2</sub>HPO<sub>4</sub> (14.2 mg, 100  $\mu$ mol, 1.0 equiv), Fe(dibm)<sub>3</sub> (2.6 mg, 5.0  $\mu$ mol, 5 mol %), and a solution of PhSiD<sub>3</sub><sup>31</sup> (7.4 M in Et<sub>2</sub>O, 270  $\mu$ L, 200  $\mu$ mol, 2.0 equiv) in EtOH (0.23 mL) was heated at 60 °C with stirring for 1 h. Purification by flash column chromatography (SiO<sub>2</sub>, 97:3 hexanes:EtOAc) furnished deuterated **90** as a colorless oil (15.8 mg, 66.1  $\mu$ mol, 66%).

**Physical State:** colorless oil.

**<sup>1</sup>H NMR** (600 MHz, CDCl<sub>3</sub>):  $\delta$  2.56 – 2.52 (m, 2 H), 2.16 (s, 3 H), 1.71 – 1.67 (m, 2 H), 1.20 (s, 3 H), 1.19 – 1.18 (m, 2 H), 0.85 (s, 9 H), 0.07 (s, 3 H), and 0.07 (s, 3 H).

$^{13}\text{C}$  NMR (151 MHz,  $\text{CDCl}_3$ ):  $\delta$  209.7, 72.8, 39.1, 38.5, 30.5, 29.6 (t,  $J = 19.5$  Hz), 25.9, 18.3, –1.9, and –1.9.

HRMS ( $m/z$ ) calcd for  $\text{C}_{13}\text{H}_{28}\text{DO}_2\text{Si}$  [ $\text{M}+\text{H}$ ] $^+$ : 246.1994, found: 246.1996.

IR (film)  $\nu_{\text{max}}$ : 2955, 2929, 2856, 1717, 1253, 1049, 834, 772, and 670  $\text{cm}^{-1}$ .

TLC:  $R_f = 0.33$  (97:3 hexanes:EtOAc).

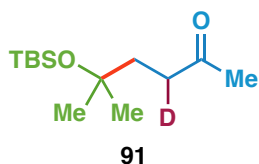

**5-((*tert*-Butyldimethylsilyloxy)-5-methylhexan-2-one-3-d (91).**

Following the general procedure, a mixture of *tert*-butyldimethyl(prop-1-en-2-yloxy)silane<sup>5</sup> (17.3 mg, 100  $\mu\text{mol}$ , 1.0 equiv), methyl vinyl ketone (24.9  $\mu\text{L}$ , 300  $\mu\text{mol}$ , 3.0 equiv),  $\text{Na}_2\text{HPO}_4$  (14.2 mg, 0.1 mmol, 1.0 equiv),  $\text{Fe}(\text{dibm})_3$  (2.6 mg, 5.0  $\mu\text{mol}$ , 5 mol %), and  $\text{PhSiH}_3$  (24.6  $\mu\text{L}$ , 200  $\mu\text{mol}$ , 2.0 equiv) in ethanol- $\text{d}_1$  or ethanol- $\text{d}_6$  (0.50 mL) was heated at 60  $^\circ\text{C}$  with stirring for 1 h. Purification by flash column chromatography ( $\text{SiO}_2$ , 97:3 hexanes:EtOAc) furnished deuterated **91** as a colorless oil (16.5 mg, 68.1  $\mu\text{mol}$ , 68%) when using ethanol- $\text{d}_1$  as the solvent and (16.6 mg, 67.7  $\mu\text{mol}$ , 68%) when using ethanol- $\text{d}_6$  as the solvent.

**Physical State:** colorless oil.

$^1\text{H}$  NMR (600 MHz,  $\text{CDCl}_3$ ):  $\delta$  2.55 – 2.50 (m, 1 H), 2.16 (s, 3 H), 1.70 – 1.65 (m, 2 H), 1.20 (s, 3 H), 1.20 (s, 3H), 0.85 (s, 9 H), 0.07 (s, 3 H), and 0.07 (s, 3 H).

$^{13}\text{C}$  NMR (151 MHz,  $\text{CDCl}_3$ ):  $\delta$  209.8, 72.8, 38.8 (t,  $J = 18.8$  Hz), 38.5, 30.1, 29.9, 26.0, 18.2, –1.9, and –1.9. 1 carbon was not observed due to incidental equivalence.

HRMS ( $m/z$ ) calcd for  $\text{C}_{13}\text{H}_{28}\text{DO}_2\text{Si}$  [ $\text{M}+\text{H}$ ] $^+$ : 246.1994, found: 246.1996.

IR (film)  $\nu_{\text{max}}$ : 2955, 2929, 2856, 1717, 1253, 1049, 834, 772, and 670  $\text{cm}^{-1}$ .

TLC:  $R_f = 0.33$  (97:3 hexanes:EtOAc).



## Use of Unconventional Solvents for Olefin Cross-Coupling

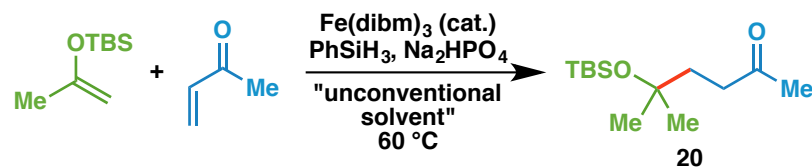

Following the general procedure, a mixture of *tert*-butyldimethyl(prop-1-en-2-yloxy)silane<sup>5</sup> (30.0 mg, 174  $\mu\text{mol}$ , 1.0 equiv), methyl vinyl ketone (43.5  $\mu\text{L}$ , 522  $\mu\text{mol}$ , 3.0 equiv),  $\text{Na}_2\text{HPO}_4$  (24.7 mg, 174  $\mu\text{mol}$ , 1.0 equiv),  $\text{Fe(dibm)}_3$  (4.5 mg, 8.71  $\mu\text{mol}$ , 5 mol %), and  $\text{PhSiH}_3$  (42.9  $\mu\text{L}$ , 348  $\mu\text{mol}$ , 2.0 equiv) in an unconventional solvent (0.87 mL) was heated at  $60\text{ }^\circ\text{C}$  with stirring for 1 h. The reaction mixture was then cooled to rt, diluted with EtOAc, and analyzed by TLC (95:5 hexanes:EtOAc) and GC/MS to confirm the formation of silyl ether **20**.

**Table S2.** Unconventional solvents used.

|                             |                                    |
|-----------------------------|------------------------------------|
| A. EtOH (control)           | E. Jack Daniel's Whiskey           |
| B. Smirnoff Vodka           | F. Stone IPA                       |
| C. Jose Cuervo Tequila Gold | G. Turning Leaf Chardonnay         |
| D. Seagram's Extra Dry Gin  | H. Woodbridge Merlot, 2012 Vintage |

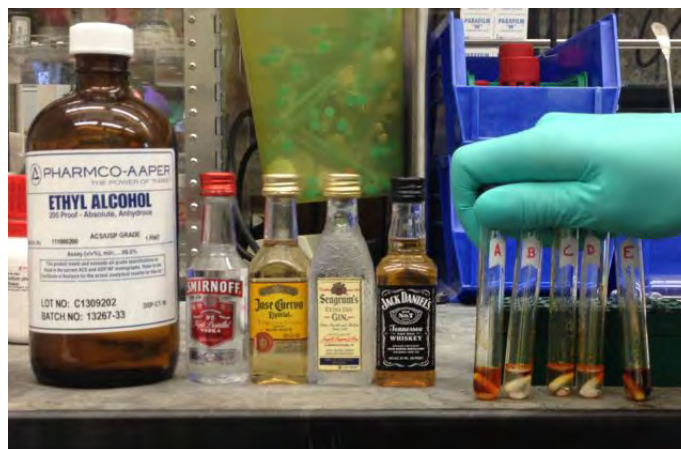

**Figure S23.** Reaction mixtures using solvents A–E prior to heating at  $60\text{ }^\circ\text{C}$ .

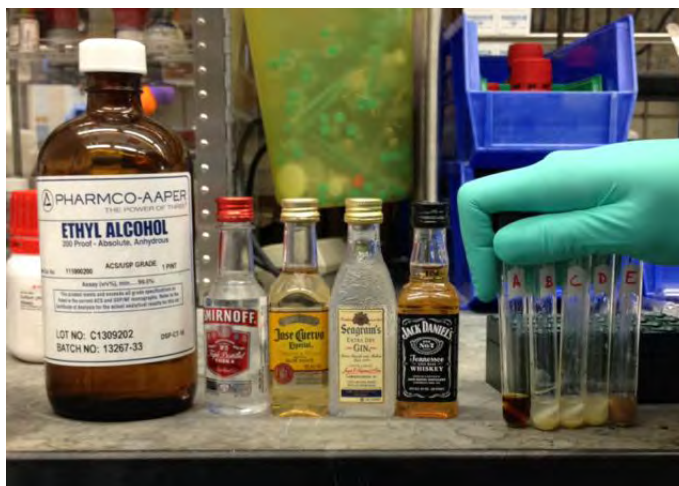

**Figure S24.** Reaction mixtures using solvents A–E after heating at 60 °C.

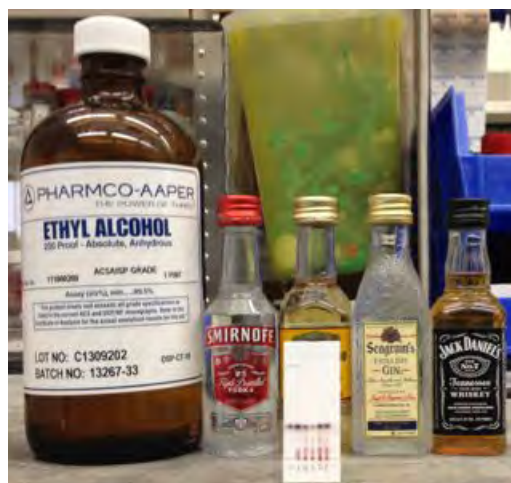

**Figure S25.** TLC of reactions using solvents A–E (95:5 hexanes:EtOAc).

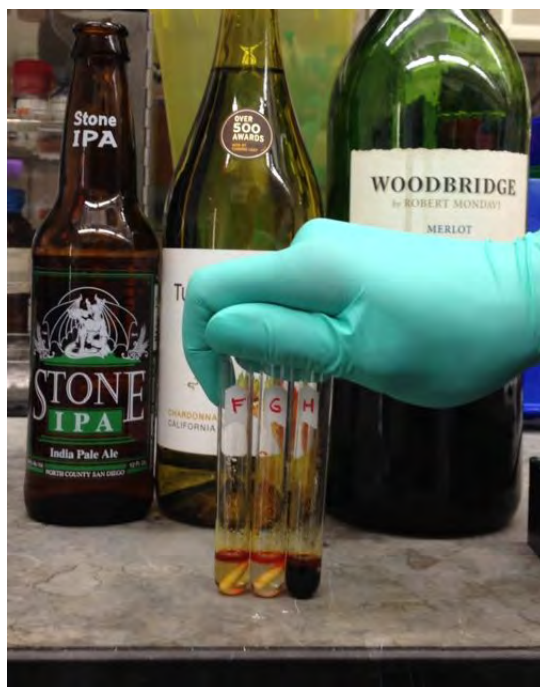

**Figure S26.** Reaction mixtures using solvents **F–H** prior to heating at 60 °C.

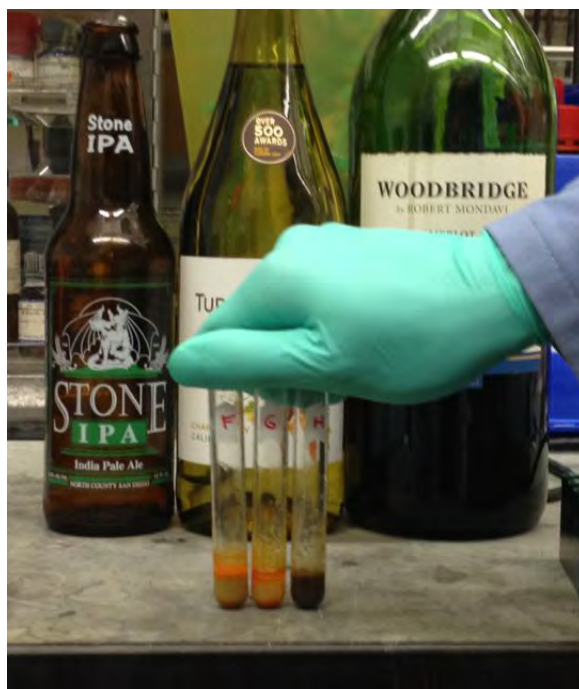

**Figure S27.** Reaction mixtures using solvents **F–H** after heating at 60 °C.

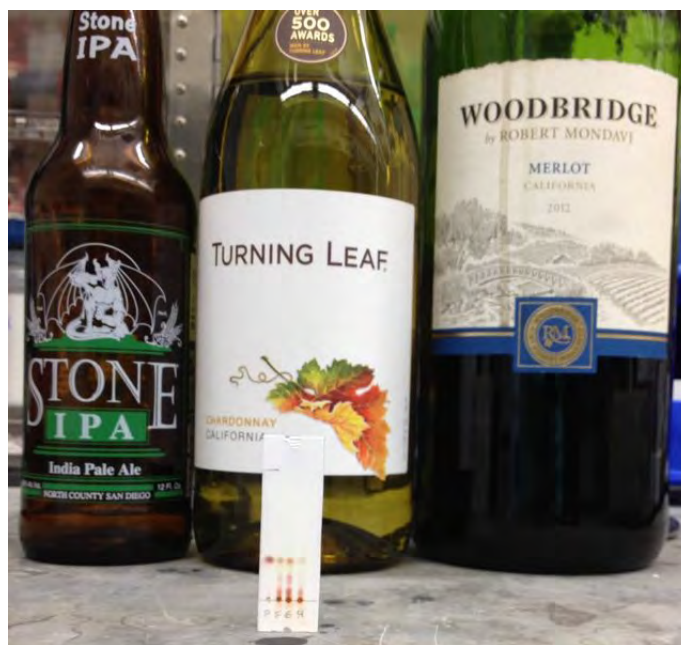

**Figure S28.** TLC of reactions using solvents **F–H** (95:5 hexanes:EtOAc).

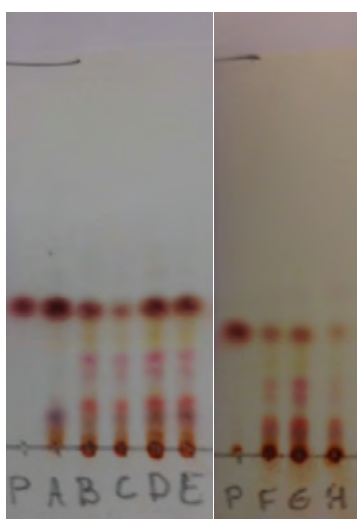

**Figure S29.** Close ups of TLCs of reactions using solvents **A–H** (95:5 hexanes:EtOAc, **P** is isolated product).

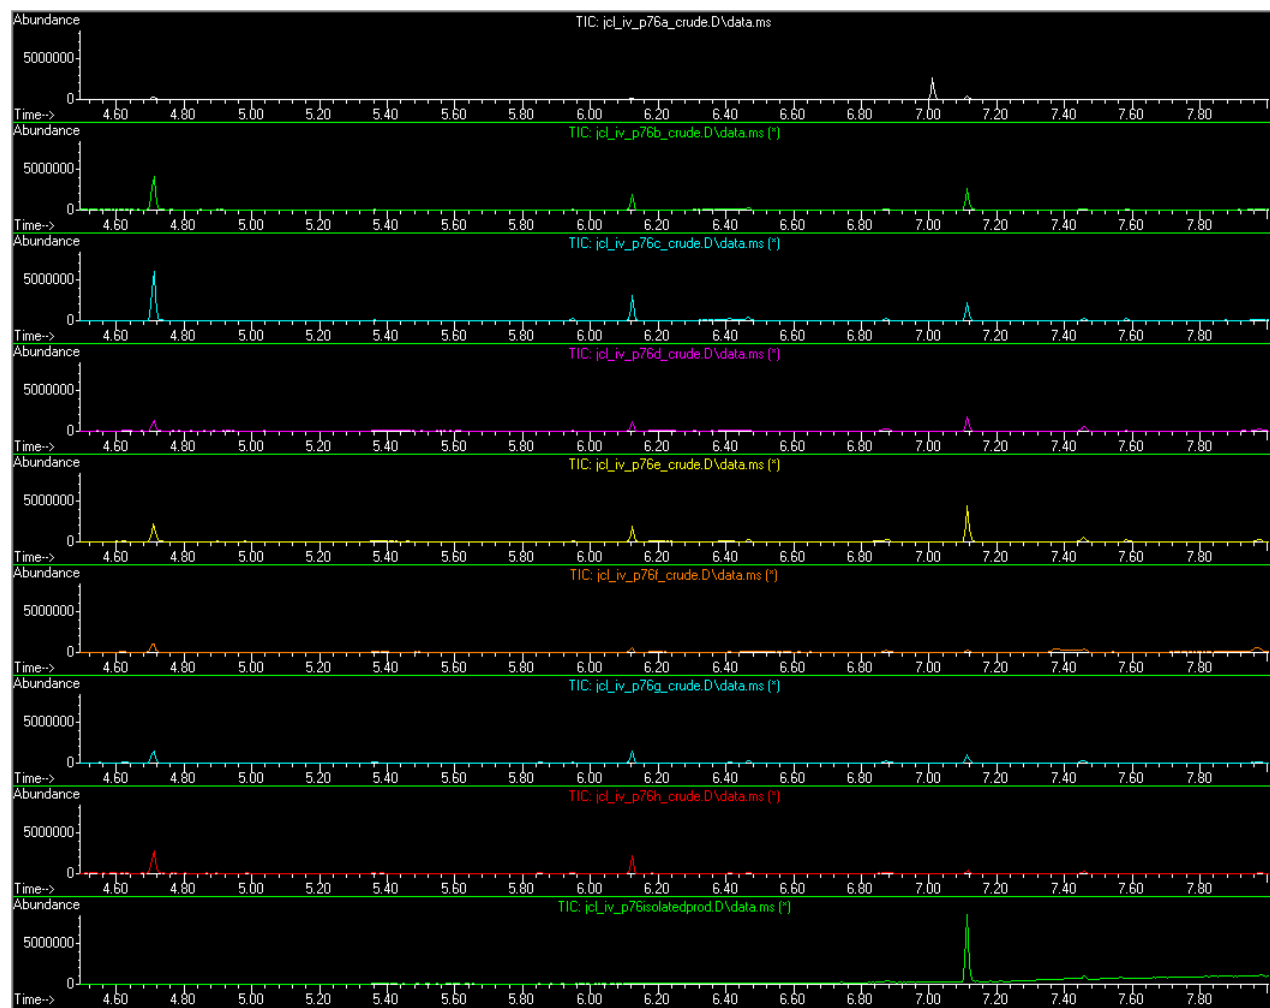

**Figure S30.** GC/MS analysis of reactions using solvents A–H. From top to bottom: **A, B, C, D, E, F, G, H**, isolated product.

## References

1. Kao, H.-L. & Lee, C.-F. Efficient copper-catalyzed S-vinylation of thiols with vinyl halides. *Org. Lett.* **13**, 5204–5207 (2011).
2. Lee, H. L., Baggiolini, E. G. & Uskoković, M. R. Synthesis of D-biotin from cysteine. *Tetrahedron* **43**, 4887–4903 (1987).
3. Song, D., Rostami, A. & West, F. G. Domino electrocyclization/azide-capture/Schmidt rearrangement of dienones: one-step synthesis of dihydropyridones from simple building blocks. *J. Am. Chem. Soc.* **129**, 12019–12022 (2007).
4. King, S. M., Ma, X. & Herzon, S. B. A method for the selective hydrogenation of alkenyl halides to alkyl halides. *J. Am. Chem. Soc.* **136**, 6884–6887 (2014).
5. Mikami, K., Matsumoto, S., Ishida, A., Takamuku, S. & Suenobu, T. Addition of ketene silyl acetals to the triplet excited state of C<sub>60</sub> via photoinduced electron transfer leading to the fullereneacetates. *J. Am. Chem. Soc.* **117**, 11134–11141 (1995).
6. Lin, J.-M. & Liu, B.-S. A practical method for the preparation of trimethylsilyl enol ethers. *Synth. Commun.* **27**, 739–749 (1997).
7. Shen, Z.-L., Peng, Z., Yang, C.-M., Helberg, J., Mayer, P., Marek, I. & Knochel, P. Highly diastereoselective preparation of aldol products using new functionalized allylic aluminum reagents. *Org. Lett.* **16**, 956–959 (2014).
8. Kopta, I. & Rathke, M. W. Acylation of ketone silyl enol ethers with acetyl tetrafluoroborate. Synthesis of 1,3-diketones. *J. Org. Chem.* **46**, 3771–3773 (1981).
9. Yu, J.-Q., Wu, H.-C. & Corey, E. J. Pd(OH)<sub>2</sub>/C-mediated selective oxidation of silyl enol ethers by *tert*-butylhydroperoxide, a useful method for the conversion of ketones to  $\alpha,\beta$ -enones or  $\beta$ -silyloxy- $\alpha,\beta$ -enones. *Org. Lett.* **7**, 1415–1417 (2005).
10. Mander, L. N. & Sethi, S. P. Synthesis of *t*-butyldimethylsilyl enol ethers from sterically hindered ketones. *Tetrahedron Lett.* **25**, 5953–5956 (1984).
11. Chu, L., Ohta, C., Zuo, Z. & MacMillan, D. W. C. Carboxylic acids as a traceless activation group for conjugate additions: a three-step synthesis of ( $\pm$ )-pregabalin. *J. Am. Chem. Soc.* **136**, 10886–10889 (2014).
12. Mori, T., Taniguchi, M., Suzuki, F., Doi, H. & Oku, A. Ring-enlargement reaction of alkylidenecarbenes bearing a cyclic ether or acetal group. Formation of medium-sized cyclic enol ethers or dienol ethers *via* bicycloalkenyloxonium ylides. *J. Chem. Soc., Perkin Trans. 1* **1998**, 3623–3628 (1998).
13. Beaver, M. G. & Woerpel, K. A. Erosion of stereochemical control with increasing nucleophilicity: O-glycosylation at the diffusion limit. *J. Org. Chem.* **75**, 1107–1118 (2010).
14. Simpkins, L. M. *et al.* Potent non-nitrile dipeptidic dipeptidyl peptidase IV inhibitors. *Bioorg. Med. Chem. Lett.* **17**, 6476 (2007).
15. Okitsu, O., Suzuki, R. & Kobayashi, S. Efficient synthesis of piperidine derivatives. Development of metal triflate-catalyzed diastereoselective nucleophilic substitution reactions of 2-methoxy- and 2-acyloxypiperidines. *J. Org. Chem.* **66**, 809–823 (2001).

16. Pan, X., Cai, Q. & Ma, D. CuI/*N,N*-dimethylglycine-catalyzed coupling of vinyl halides with amides or carbamates. *Org. Lett.* **6**, 1809–1812 (2004).
17. Bach, T. & Schröder, J. The Paternò-Büchi reaction of  $\alpha$ -alkyl-substituted enecarbamates and benzaldehyde. *Synthesis* **2001**, 1117–1124 (2001).
18. Chanthamath, S., Nguyen, D. T., Shibatomi, K. & Iwasa, S. Highly enantioselective synthesis of cyclopropylamine Derivatives via Ru(II)-Pheox-catalyzed direct asymmetric cyclopropanation of vinylcarbamates *Org. Lett.* **15**, 772–775 (2013).
19. Simone, F. D., Saget, T., Benfatti, F., Almeida, S. & Waser, J. Formal homo-Nazarov and other cyclization reactions of activated cyclopropanes. *Chem. Eur. J.* **17**, 14527–14538 (2011).
20. Tamura, O. *et al.* Synthetic studies on the key component of the new generation of quinolonecarboxylic acid, DU-6859. 1. Synthesis of (1*R*,2*S*)-2-fluorocyclopropylamine by the use of optical resolution. *Tetrahedron* **50**, 3889–3904 (1994).
21. Foster, D. J. & Tobler, E. Organomercury chemistry. A novel synthesis of vinyl esters, vinyl ethers and vinyl thioethers. *J. Am. Chem. Soc.* **83**, 851–855 (1961).
22. Labiad, B. & Villemin, D. Clay catalysis: a simple and efficient synthesis of enolthioethers from cyclic ketones. *Synthesis* **1989**, 143–144 (1989).
23. Abele, E., Dzenitis, O., Rubina, K. & Lukevics, E. Synthesis of *N*- and *S*-vinyl derivatives of heteroaromatic compounds using phase-transfer catalysis. *Chem. Heterocycl. Compd.* **38**, 682–685 (2002).
24. Jang, H., Zhugralin, A. R., Lee, Y. & Hoveyda, A. H. Highly selective methods for synthesis of internal ( $\alpha$ -) vinylboronates through efficient NHC–Cu-catalyzed hydroboration of terminal alkynes. Utility in chemical synthesis and mechanistic basis for selectivity. *J. Am. Chem. Soc.* **133**, 7859–7871.
25. Casey, C. P., Gohdes, M. A. & Meszaros, M. W. Reactions of a cationic bridging methyldiyne complex with activated alkenes. *Organometallics* **5**, 196–199 (1986).
26. Merten, J. *et al.* A concise sultone route to highly oxygenated 1,10-seco-eudesmanolides – enantioselective total synthesis of the antileukemic sesquiterpene lactones(–)-eriolanin and (–)-eriolangin. *Eur. J. Org. Chem.* **2006**, 1144–1161 (2006).
27. Charpenay, M., Boudhar, A., Hulot, C., Blond, G. & Suffert, J. Expedient cascade reactions: controlled syntheses of fenestradienes and cyclooctatrienes under palladium catalysis. *Tetrahedron* **69**, 7568–7591 (2013).
28. Nicolaou, K. C. *et al.* Total synthesis and structural elucidation of azaspiracid-1. Construction of key building blocks for originally proposed structure. *J. Am. Chem. Soc.* **128**, 2244–2257 (2006).
29. Hutchinson, D. K. & Fuchs, P. L. Amelioration of the conjugate addition chemistry of  $\alpha$ -alkoxycopper reagents: application to the stereospecific synthesis of C-glycosides. *J. Am. Chem. Soc.* **109**, 4930–4939 (1987).



30. Saito, I., Nagata, R., Yuba, K. & Matsuura, T. Synthesis of  $\alpha$ -silyloxyhydroperoxides from the reaction of silyl enol ethers and hydrogen peroxide. *Tetrahedron Lett.* **24**, 1737–1740 (1983).
31. Fung, B.M. & Wei, I. Y. Proton and deuterium magnetic resonance of phenylsilane- $d_3$ , phenylphosphine- $d_2$ , and benzenethiol- $d$  in liquid crystal solutions. *J. Am. Chem. Soc.* **92**, 1497–1501 (1970).

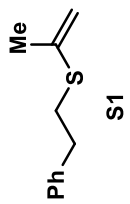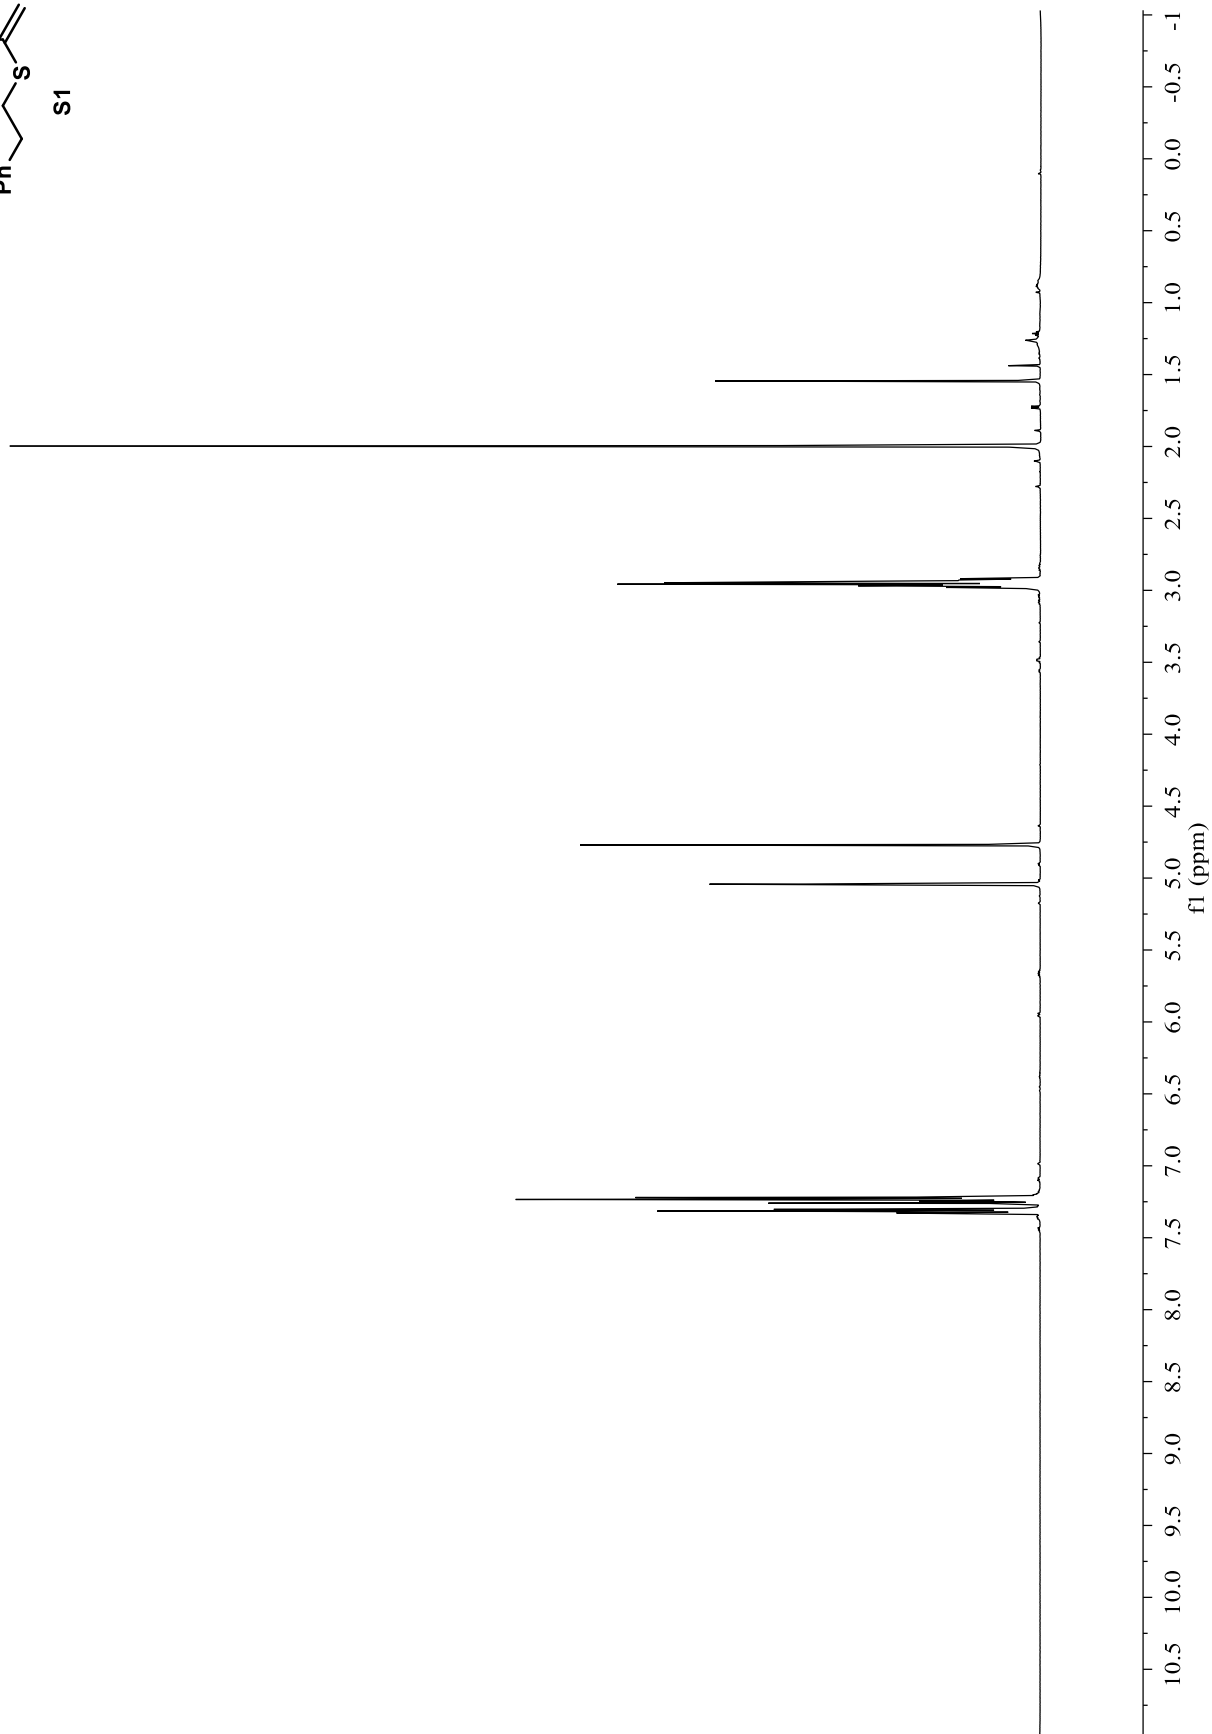

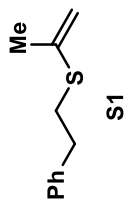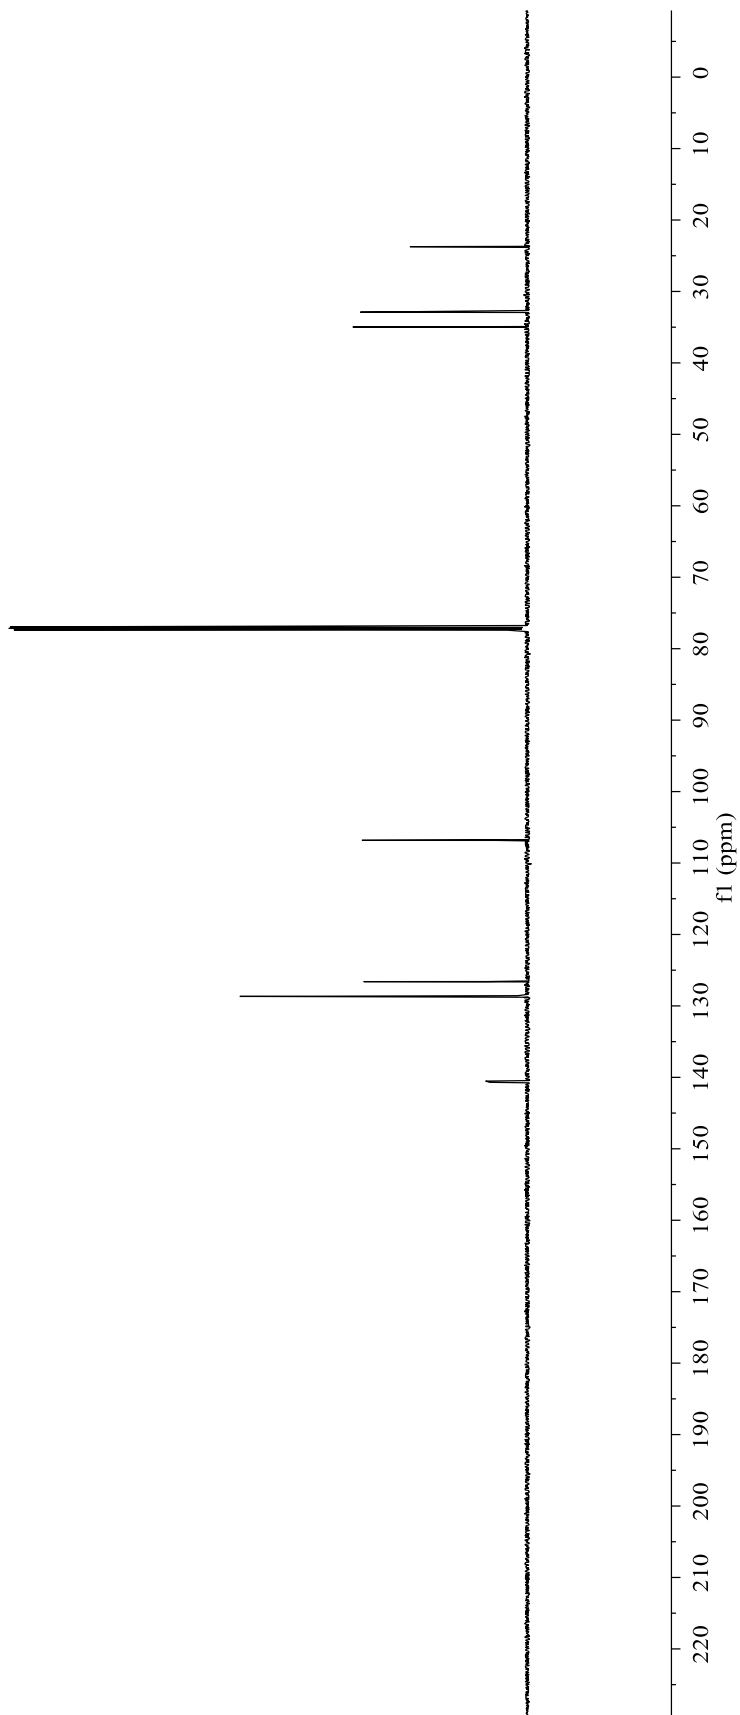

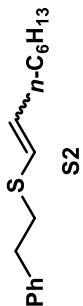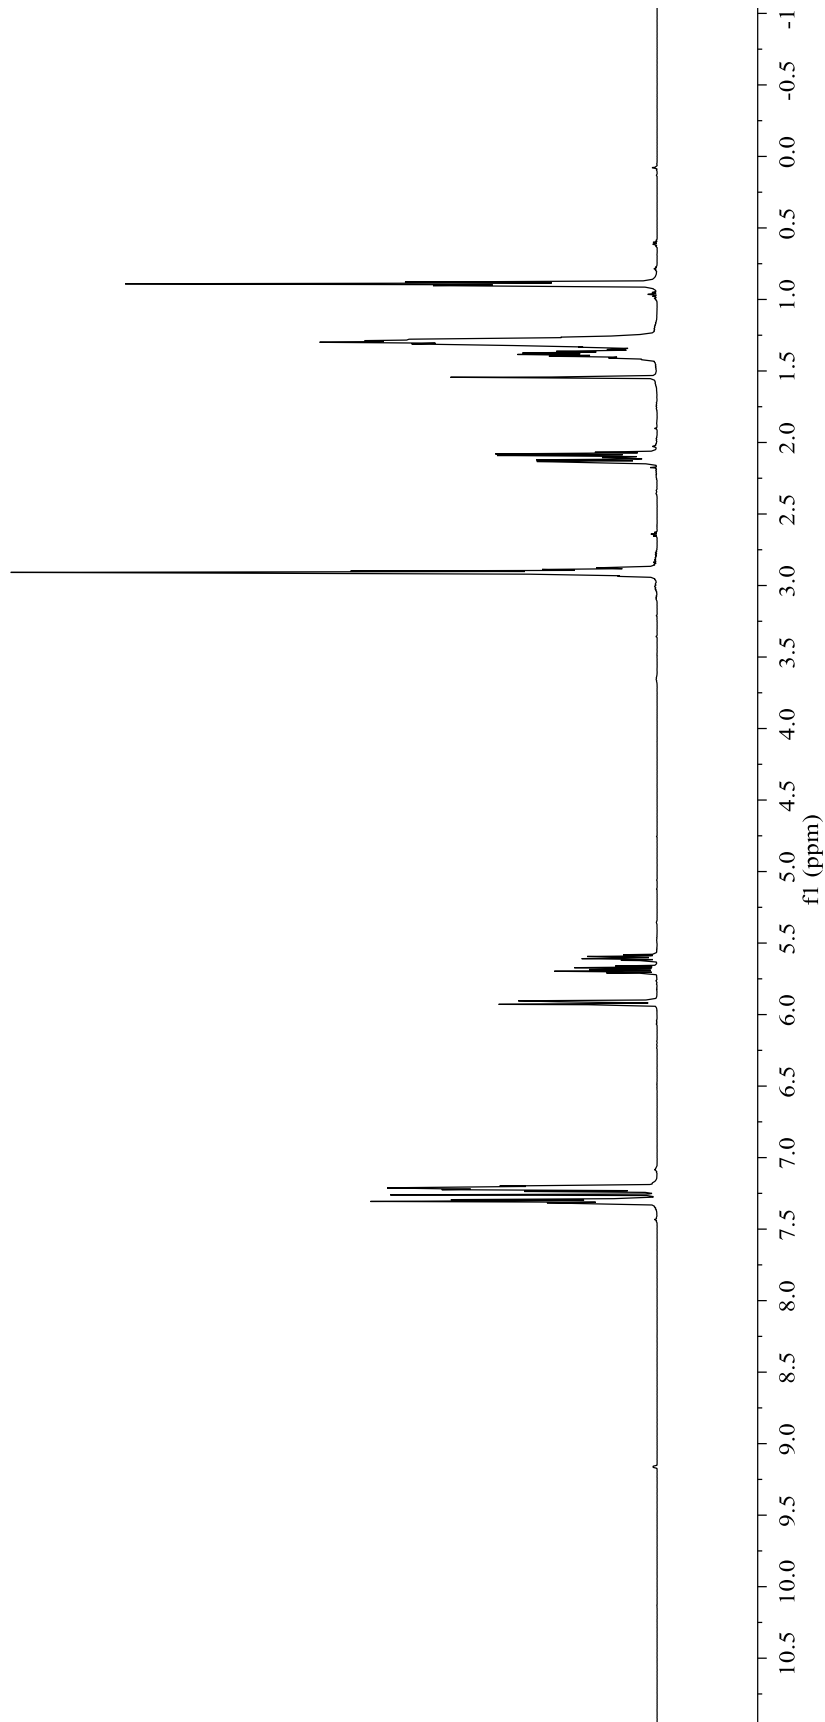

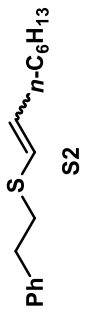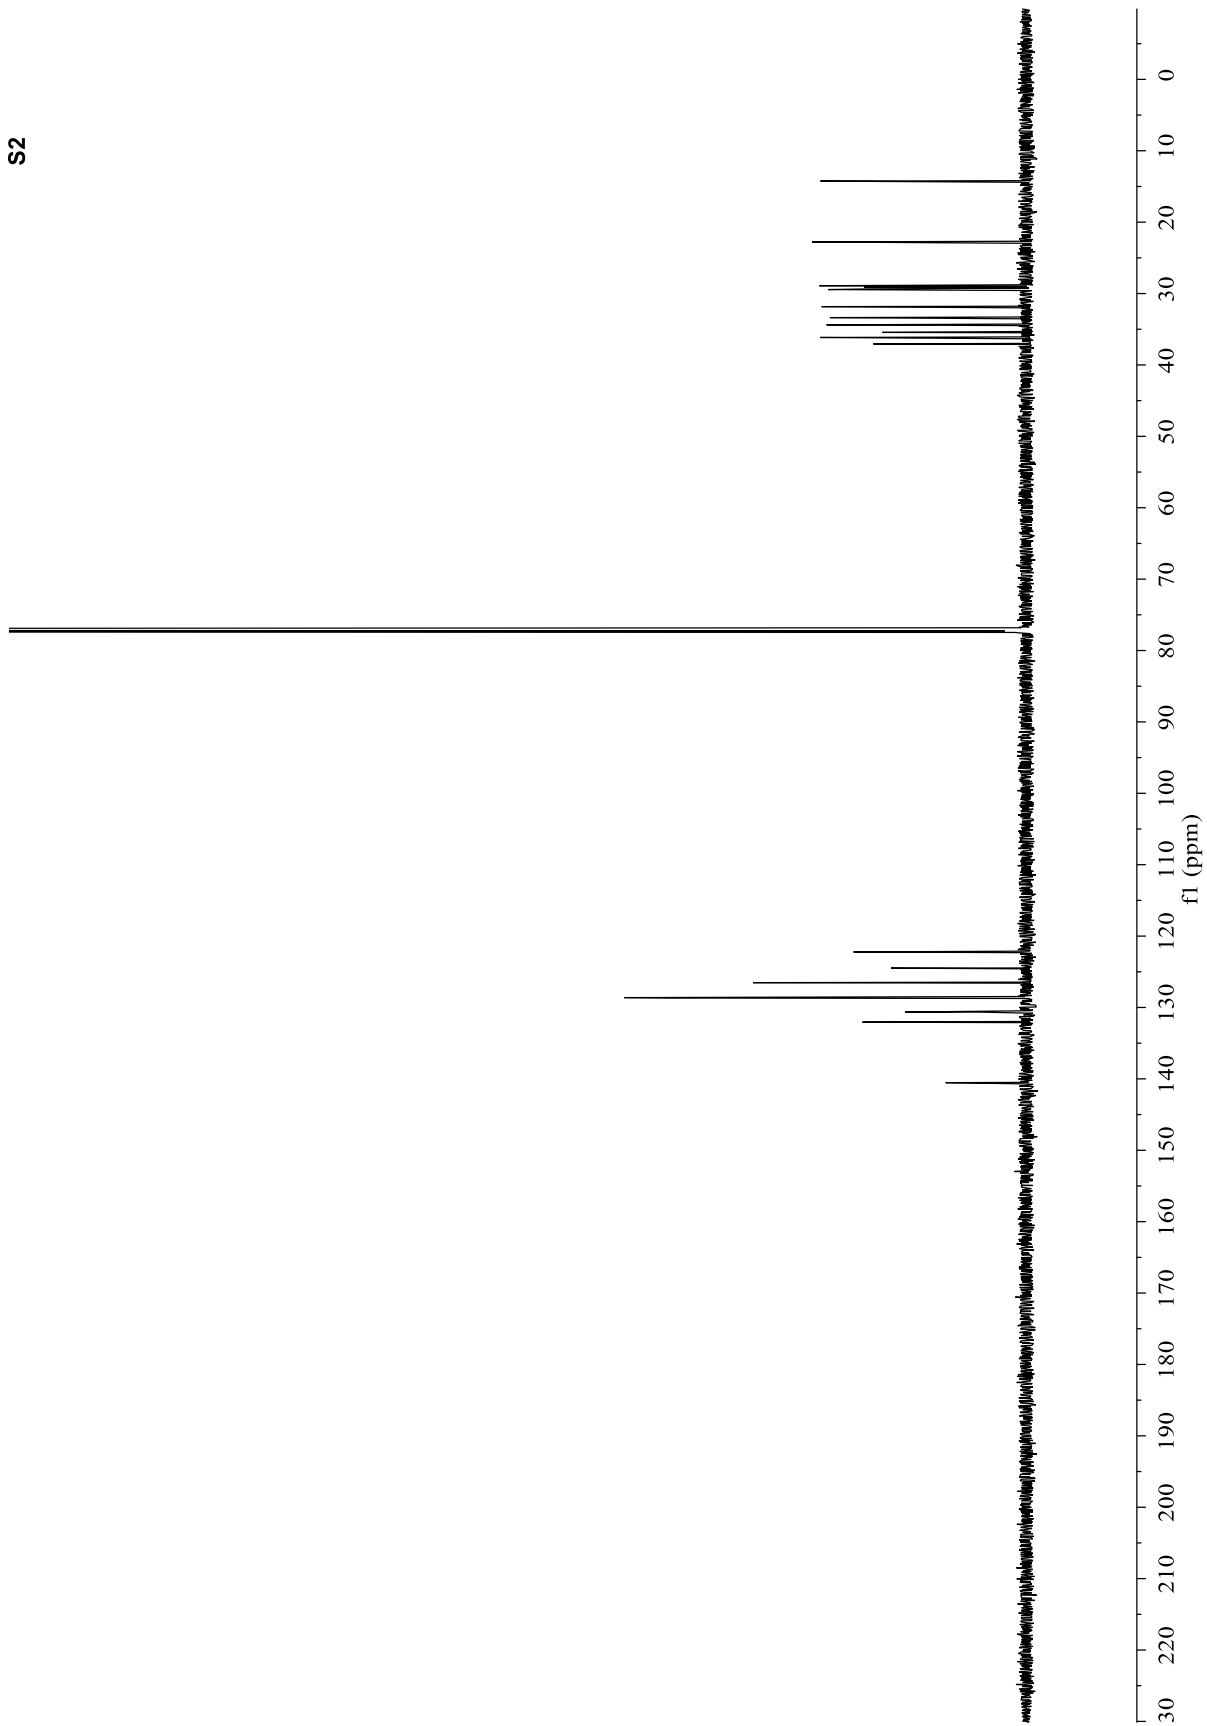

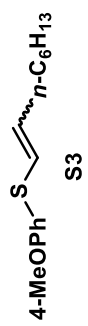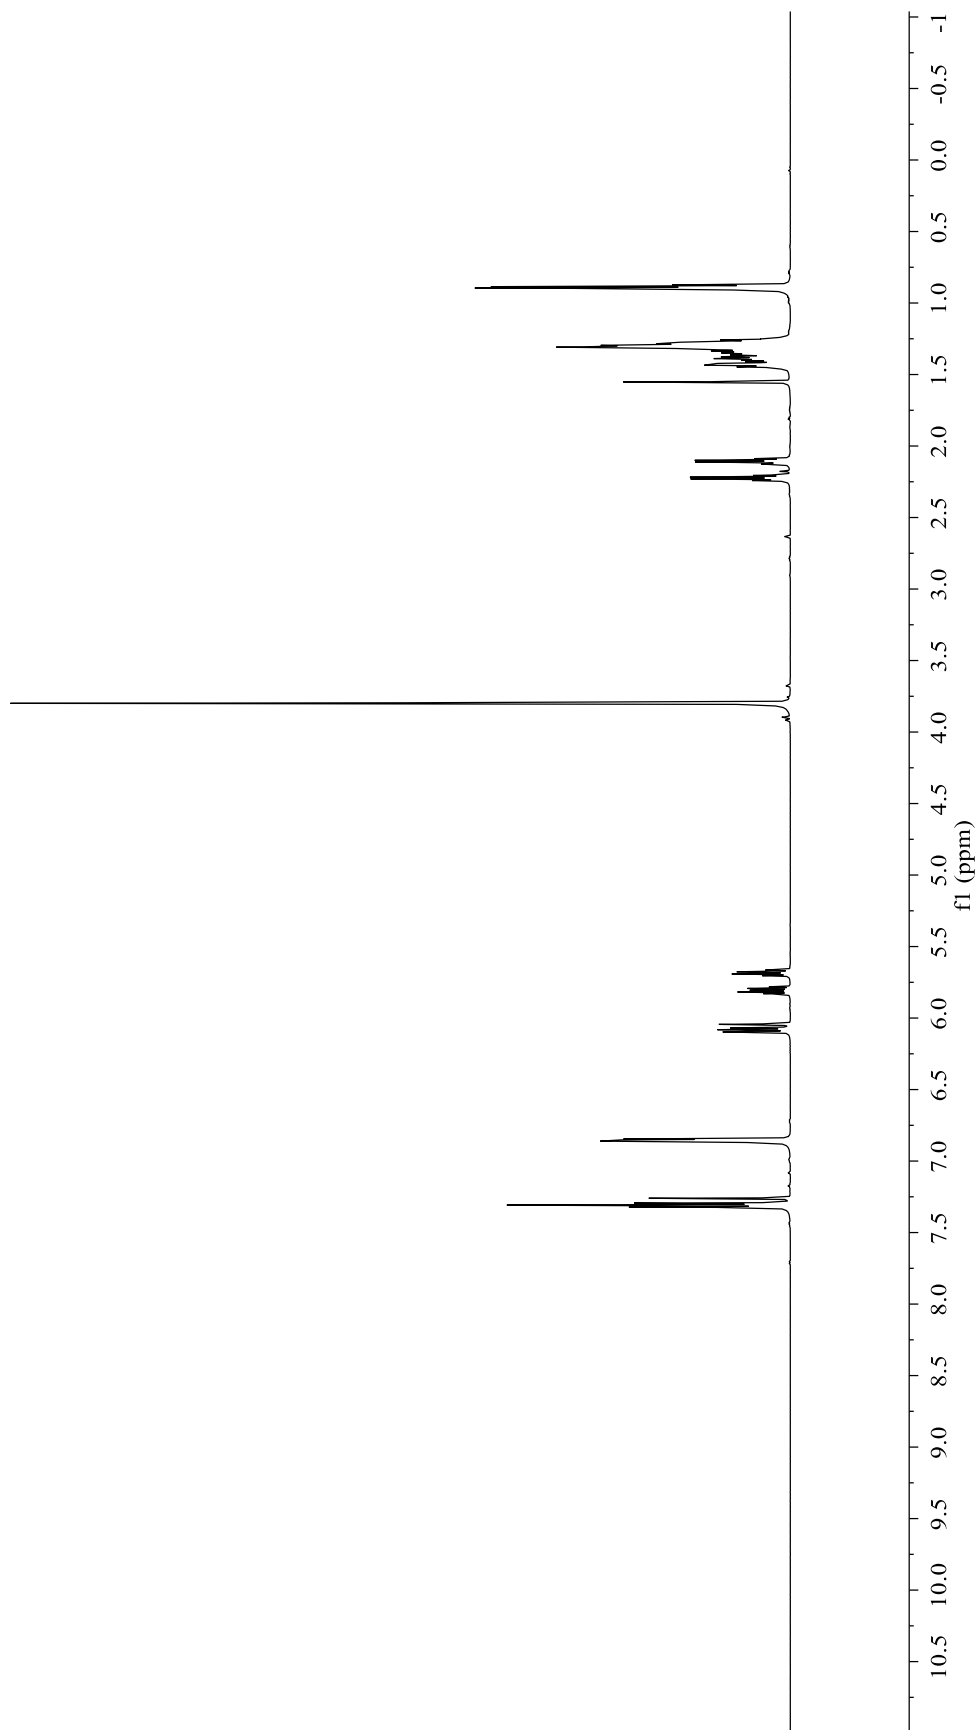

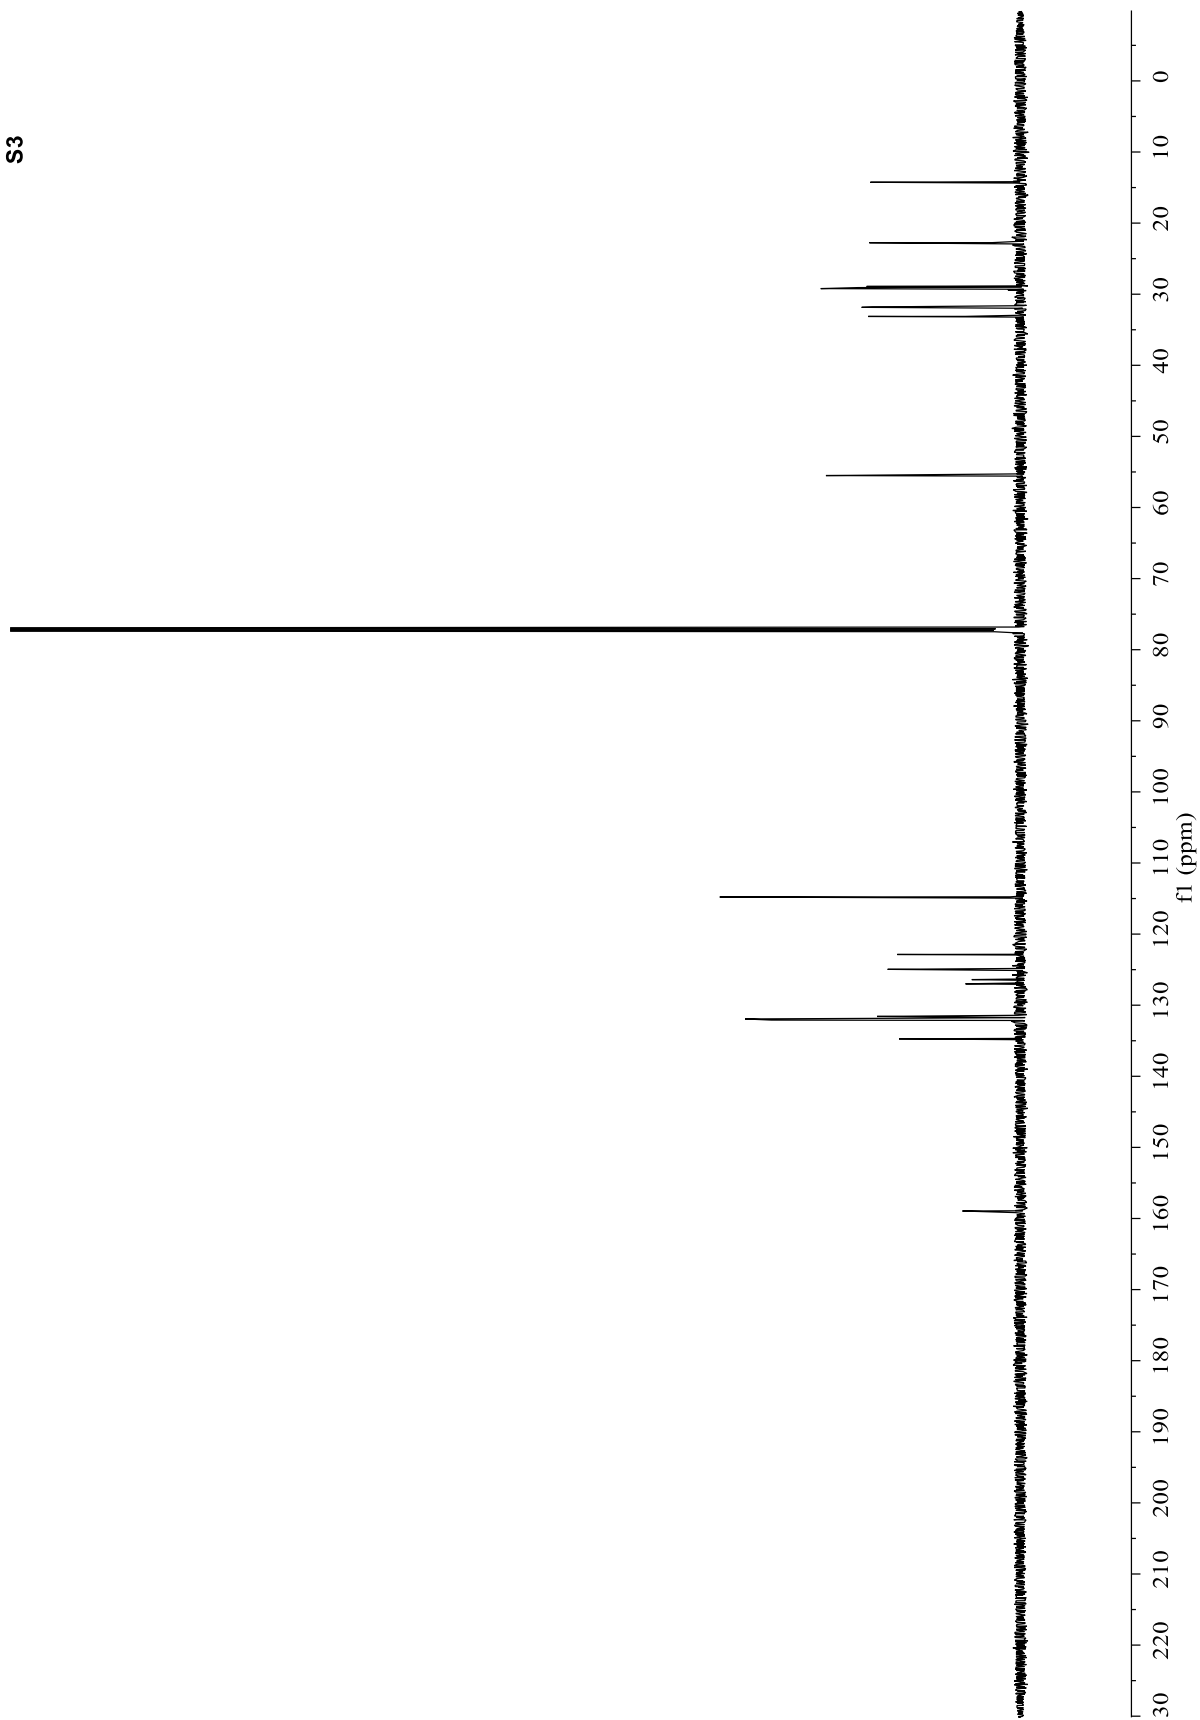



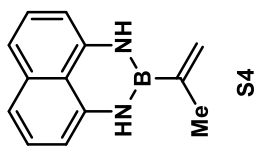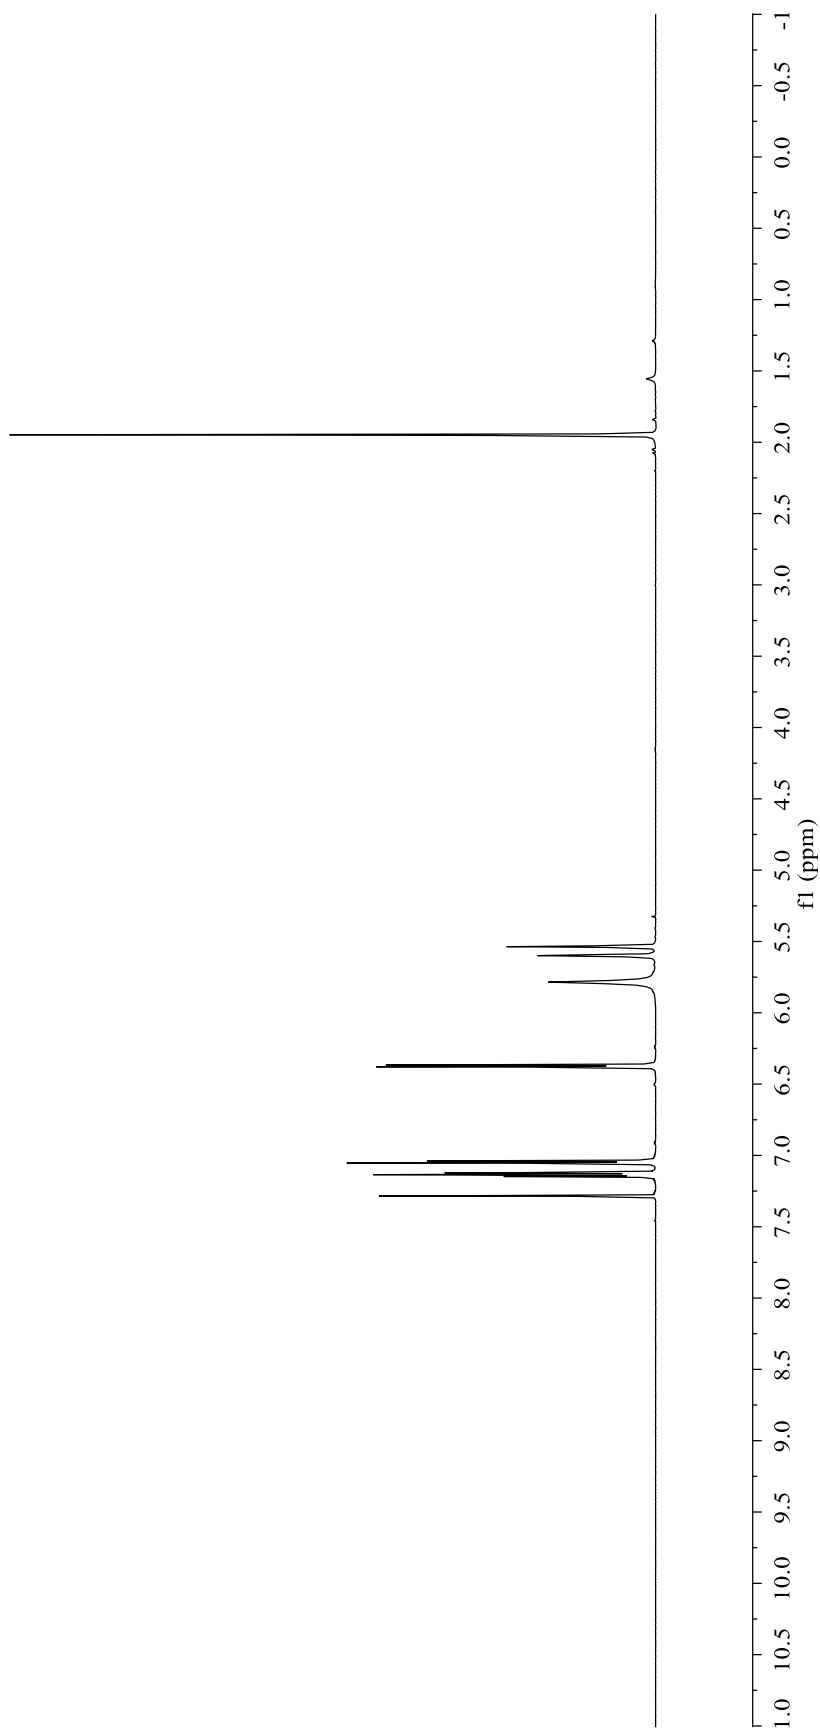

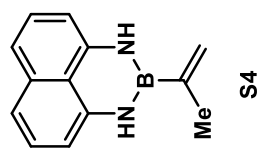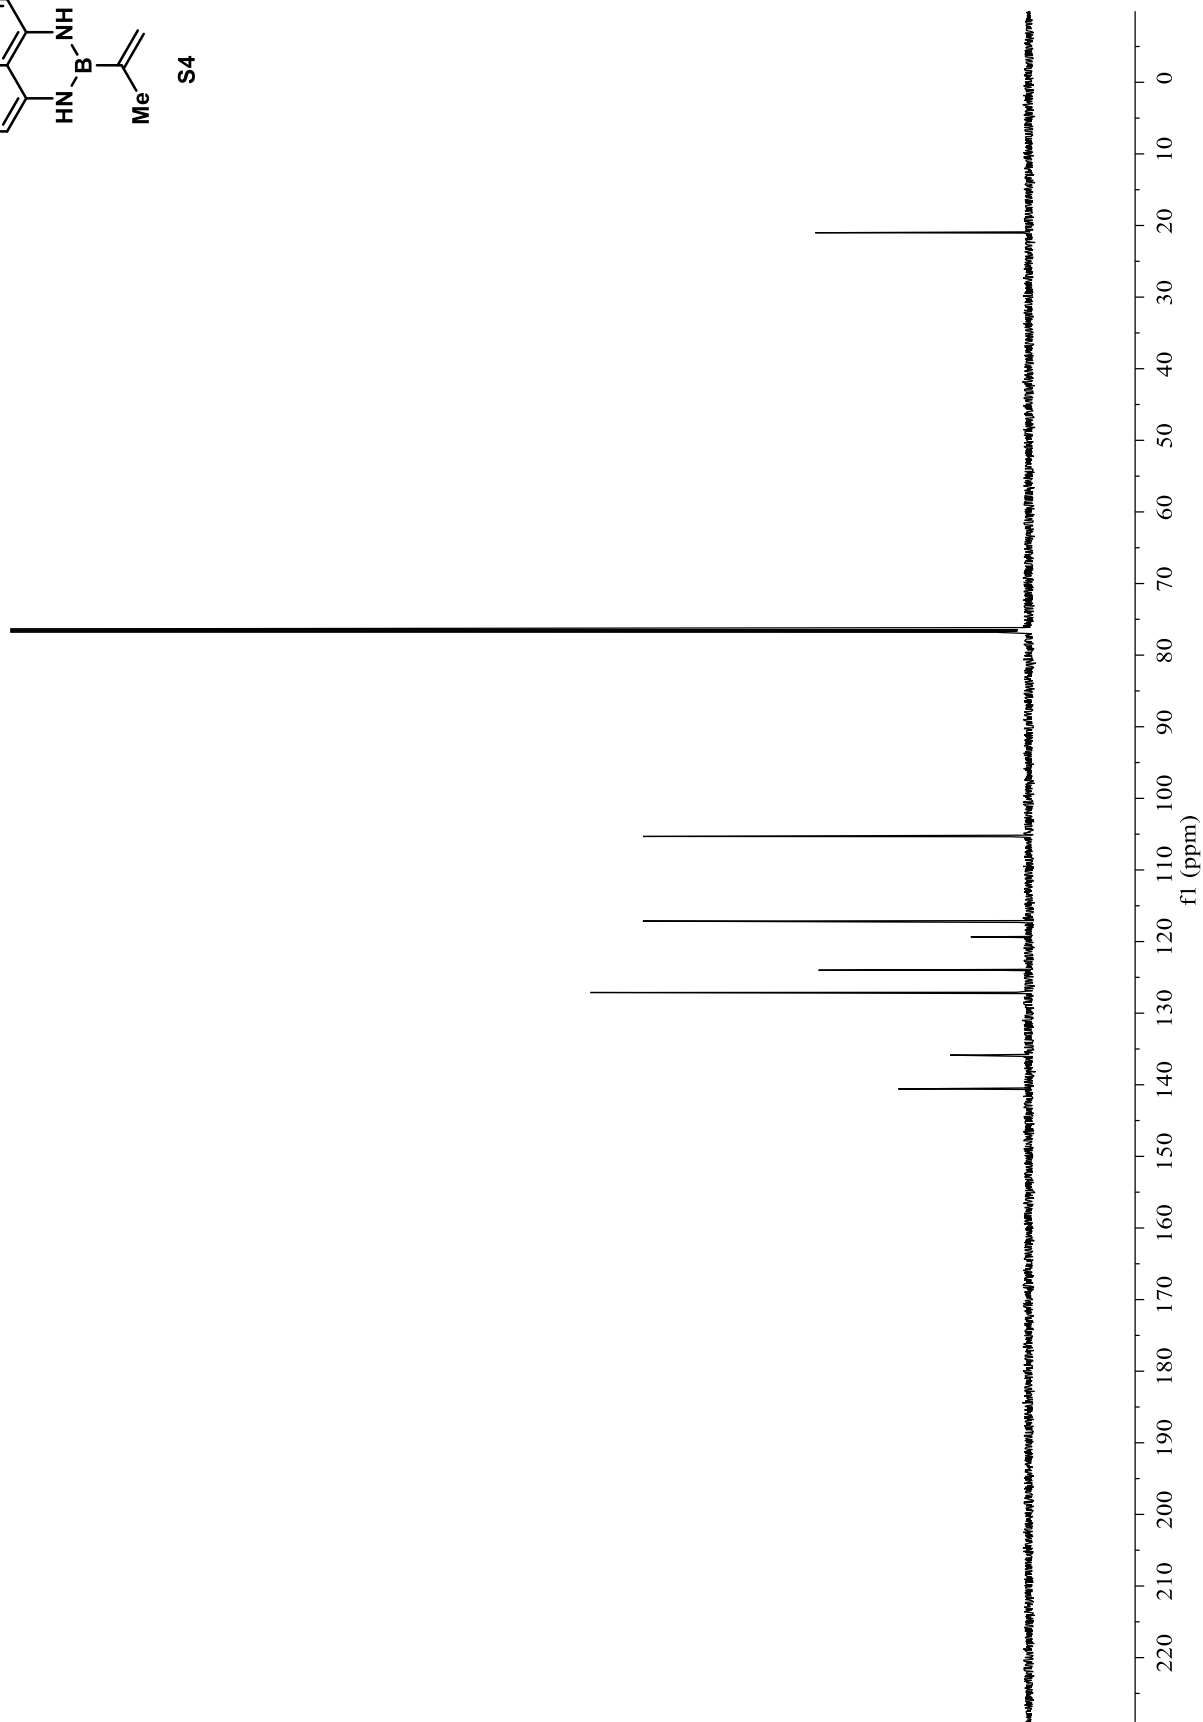

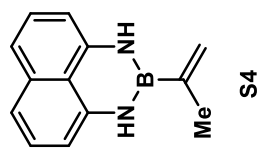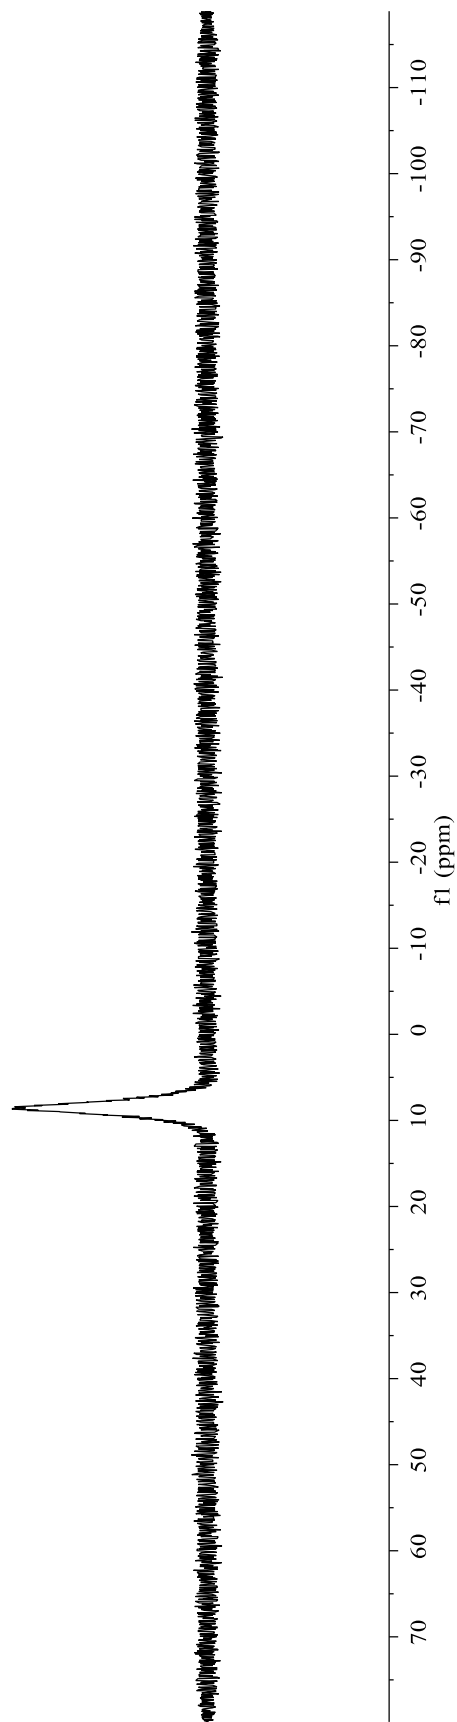

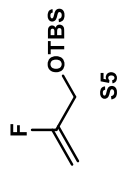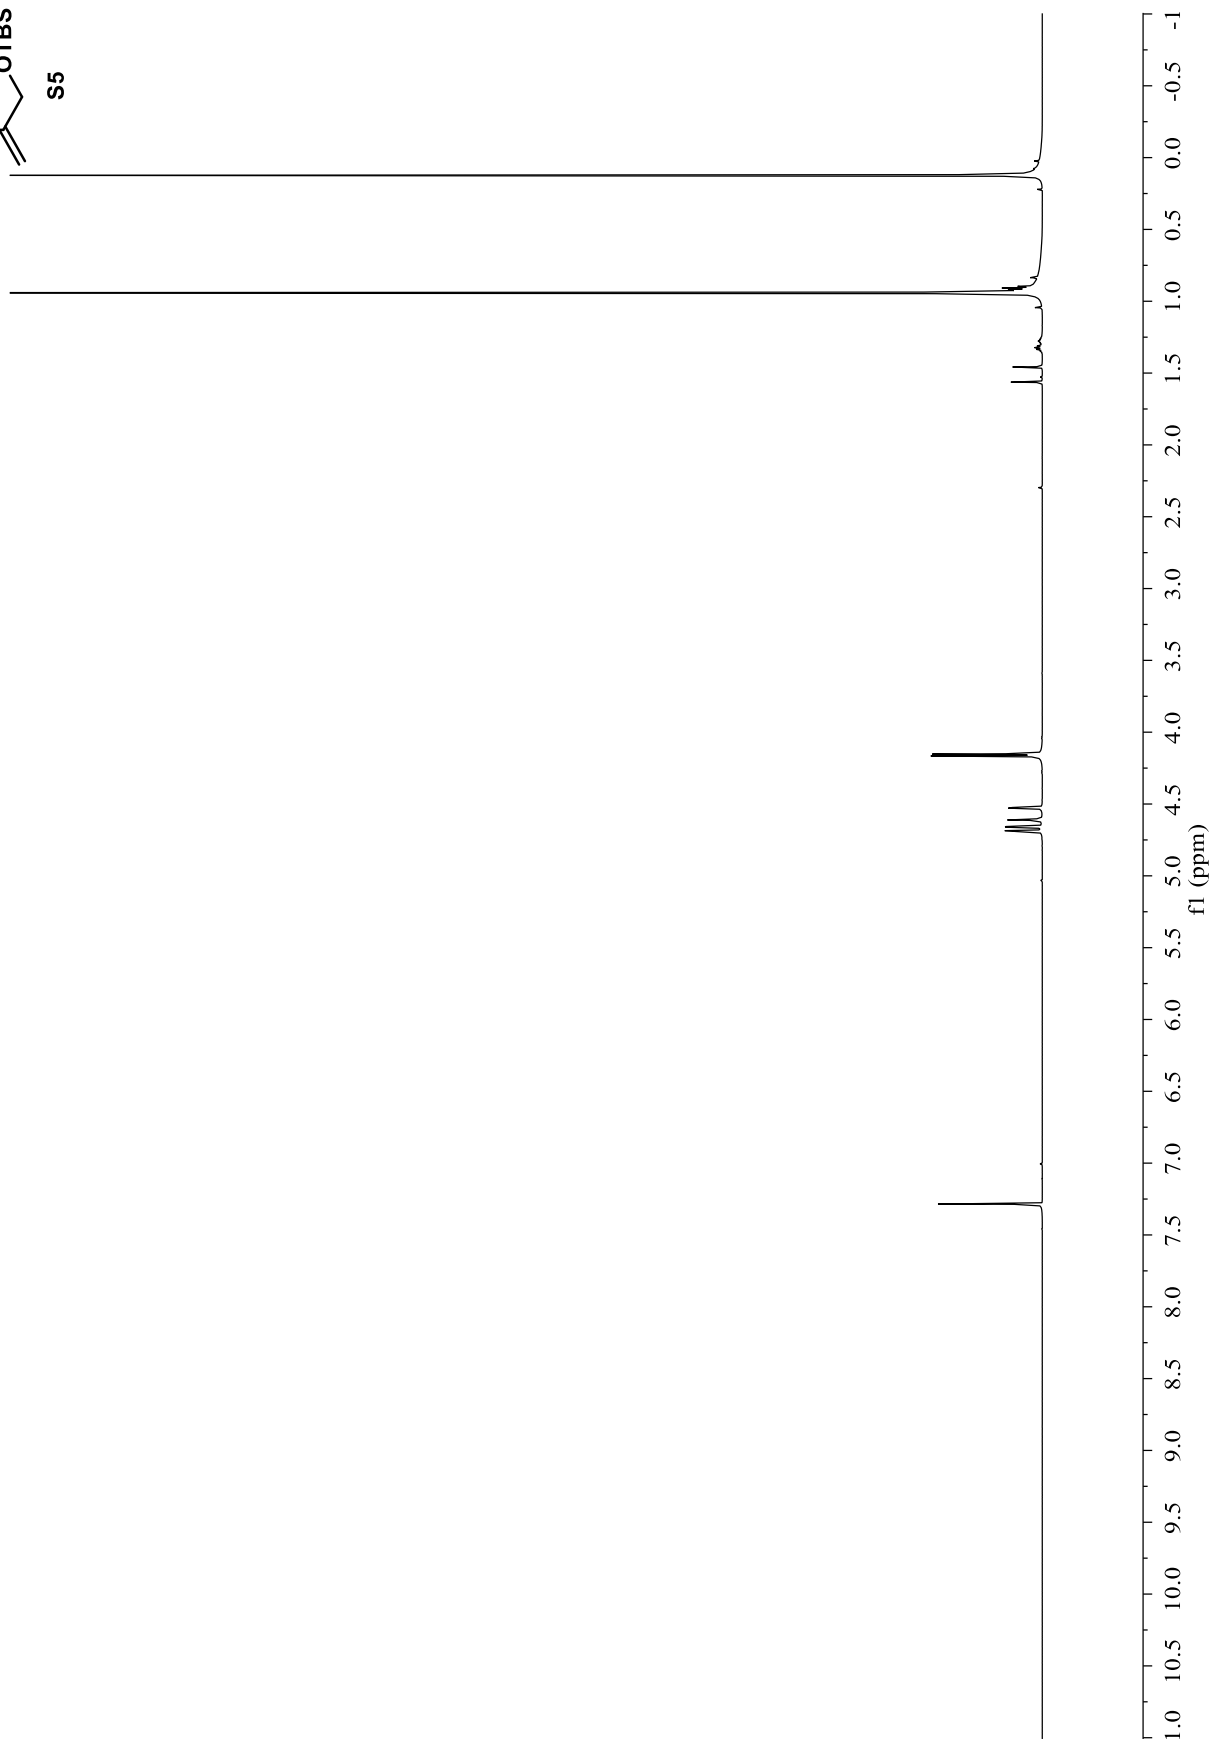

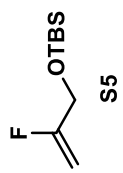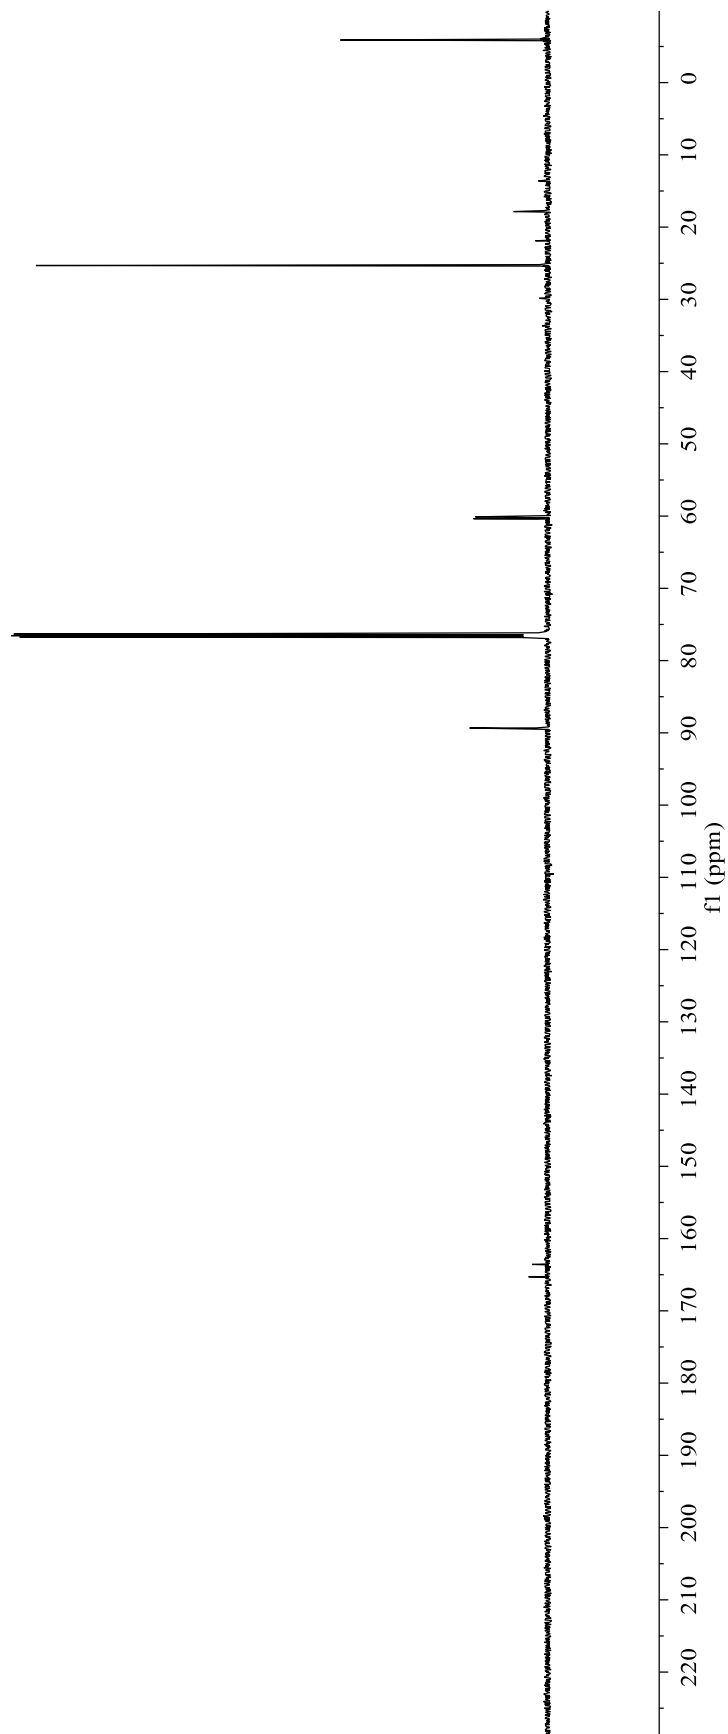

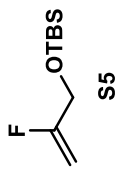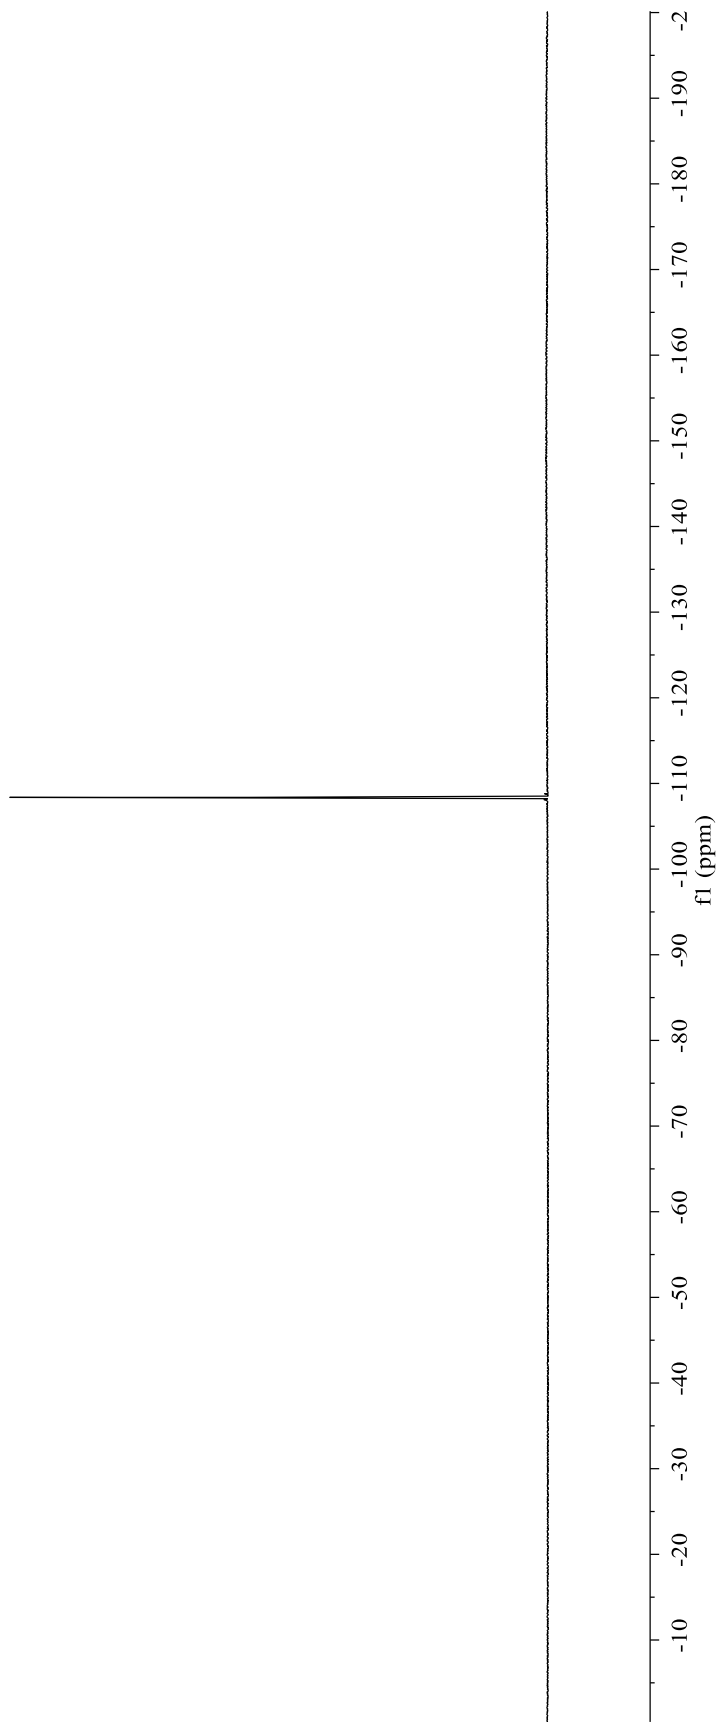

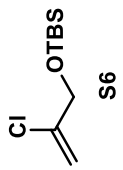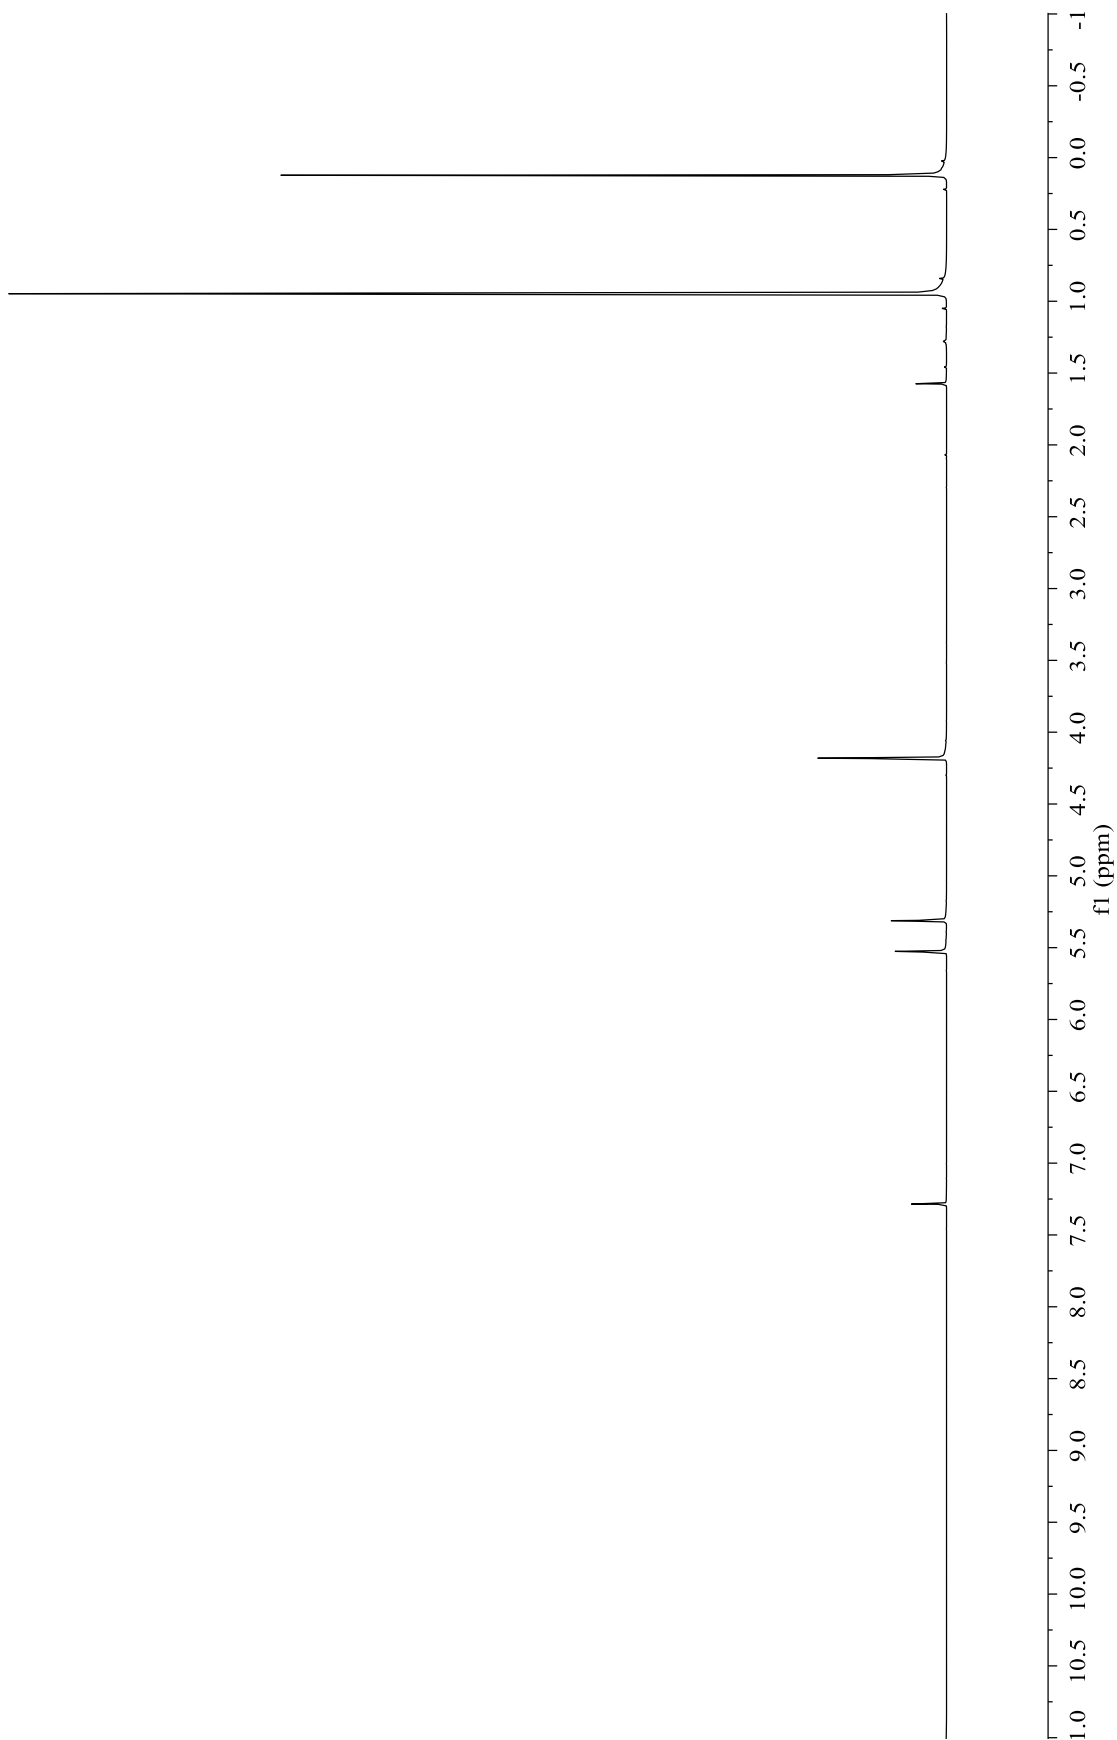



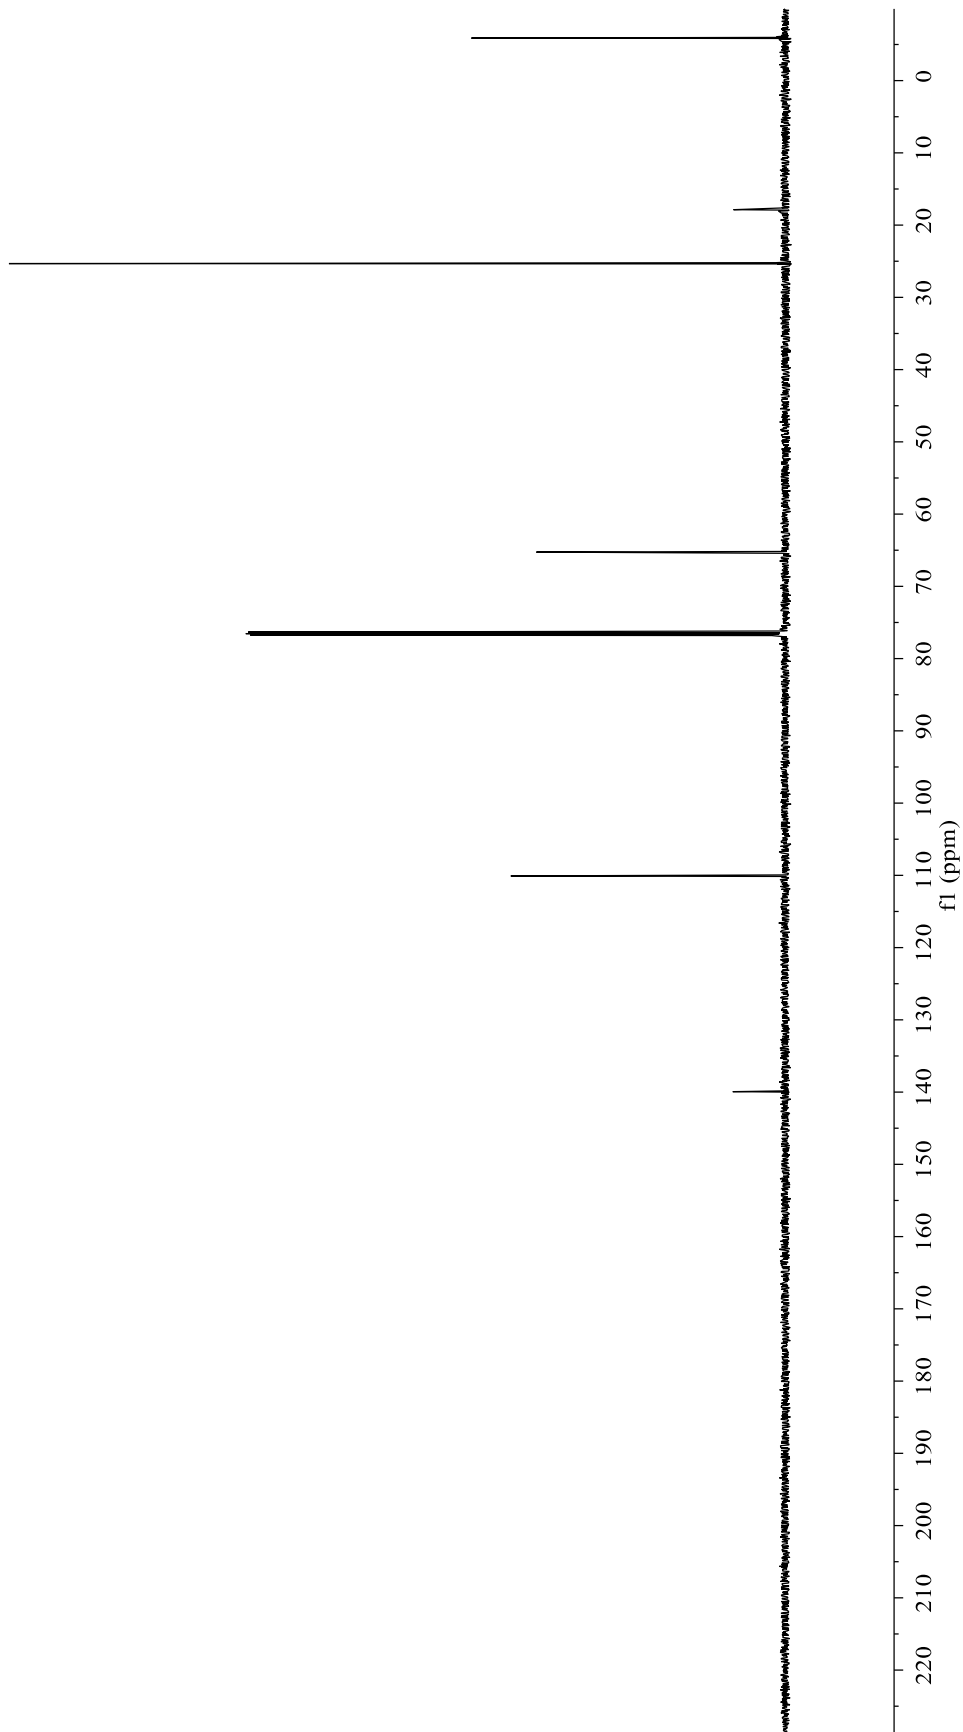

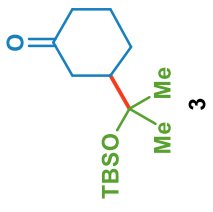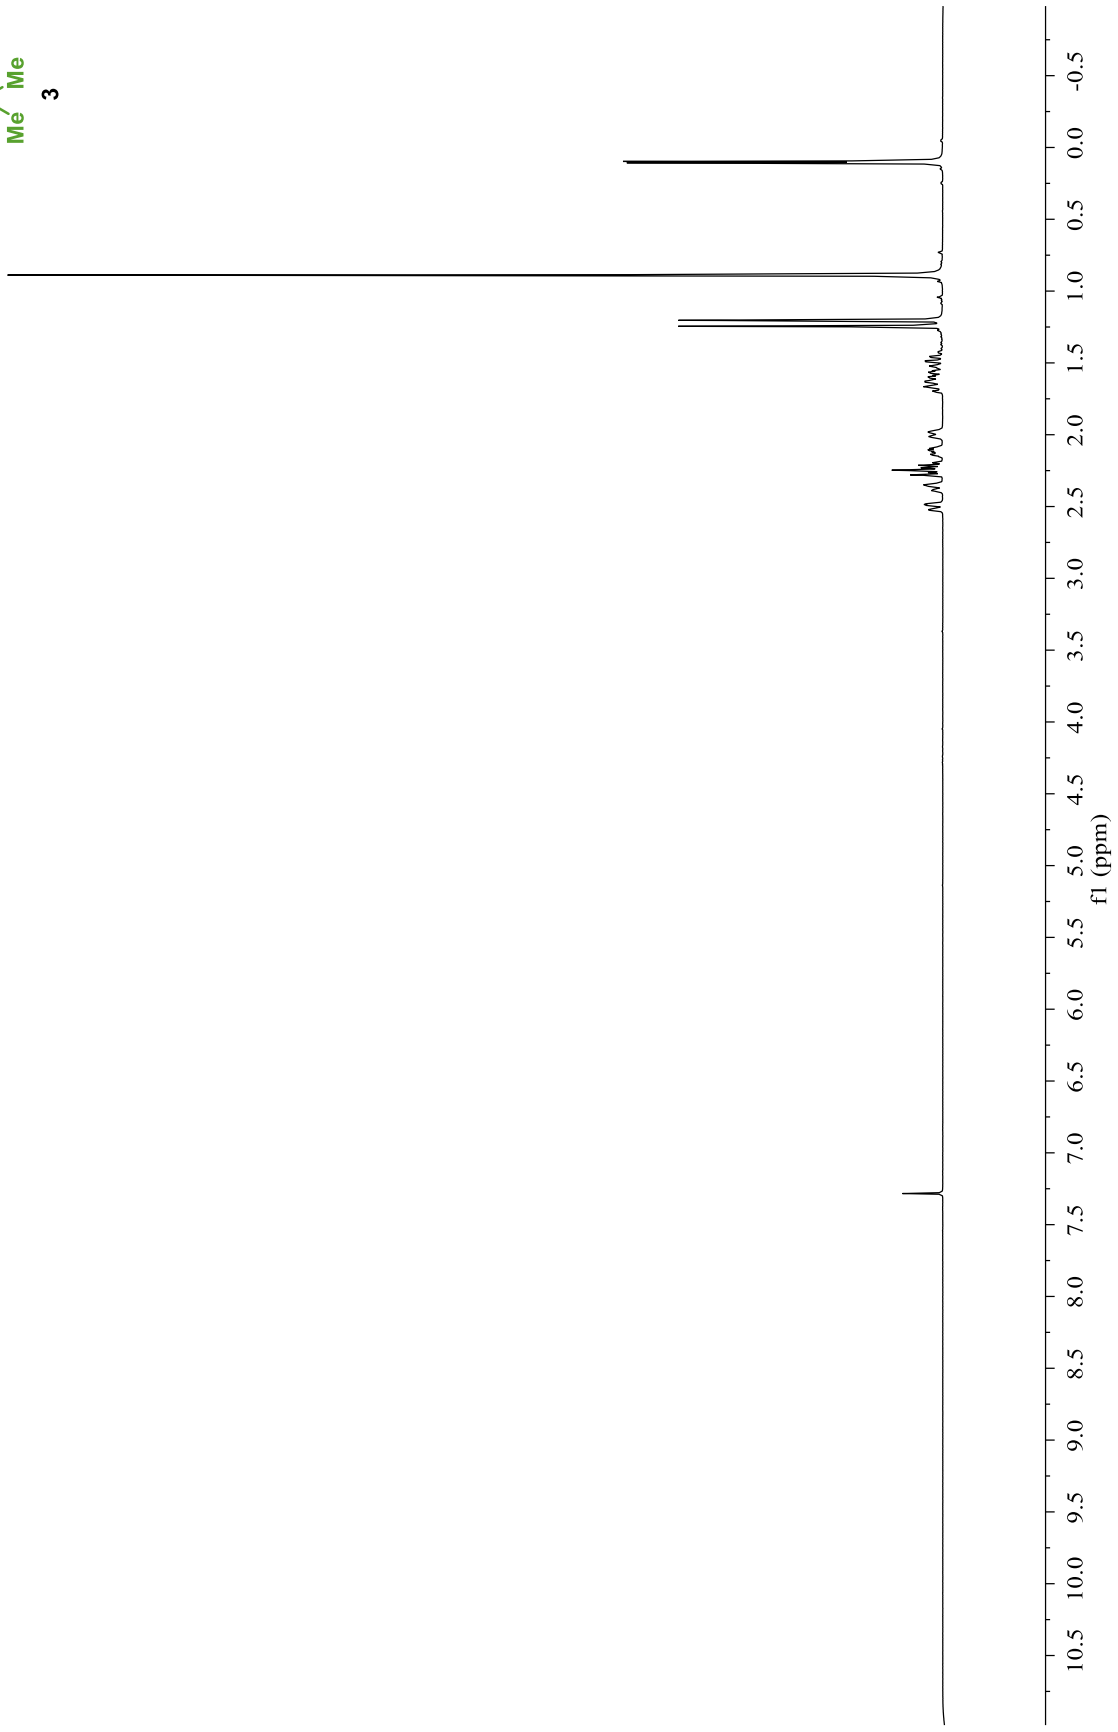

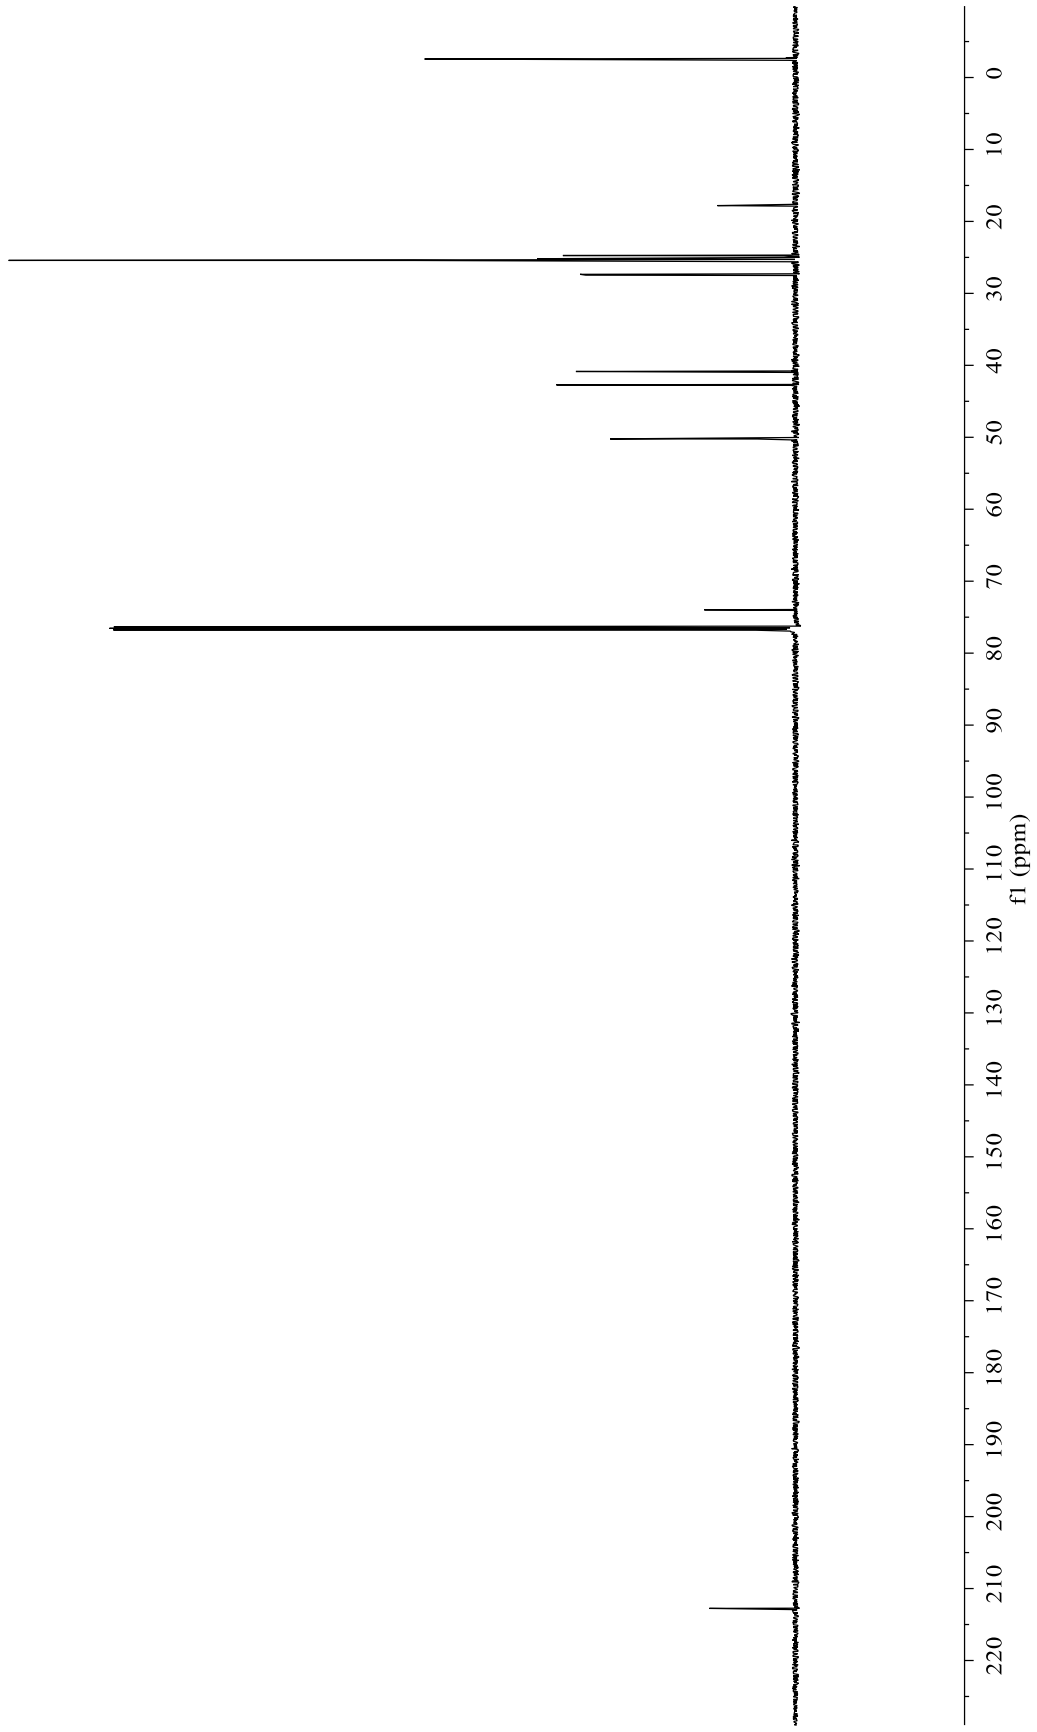

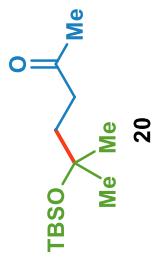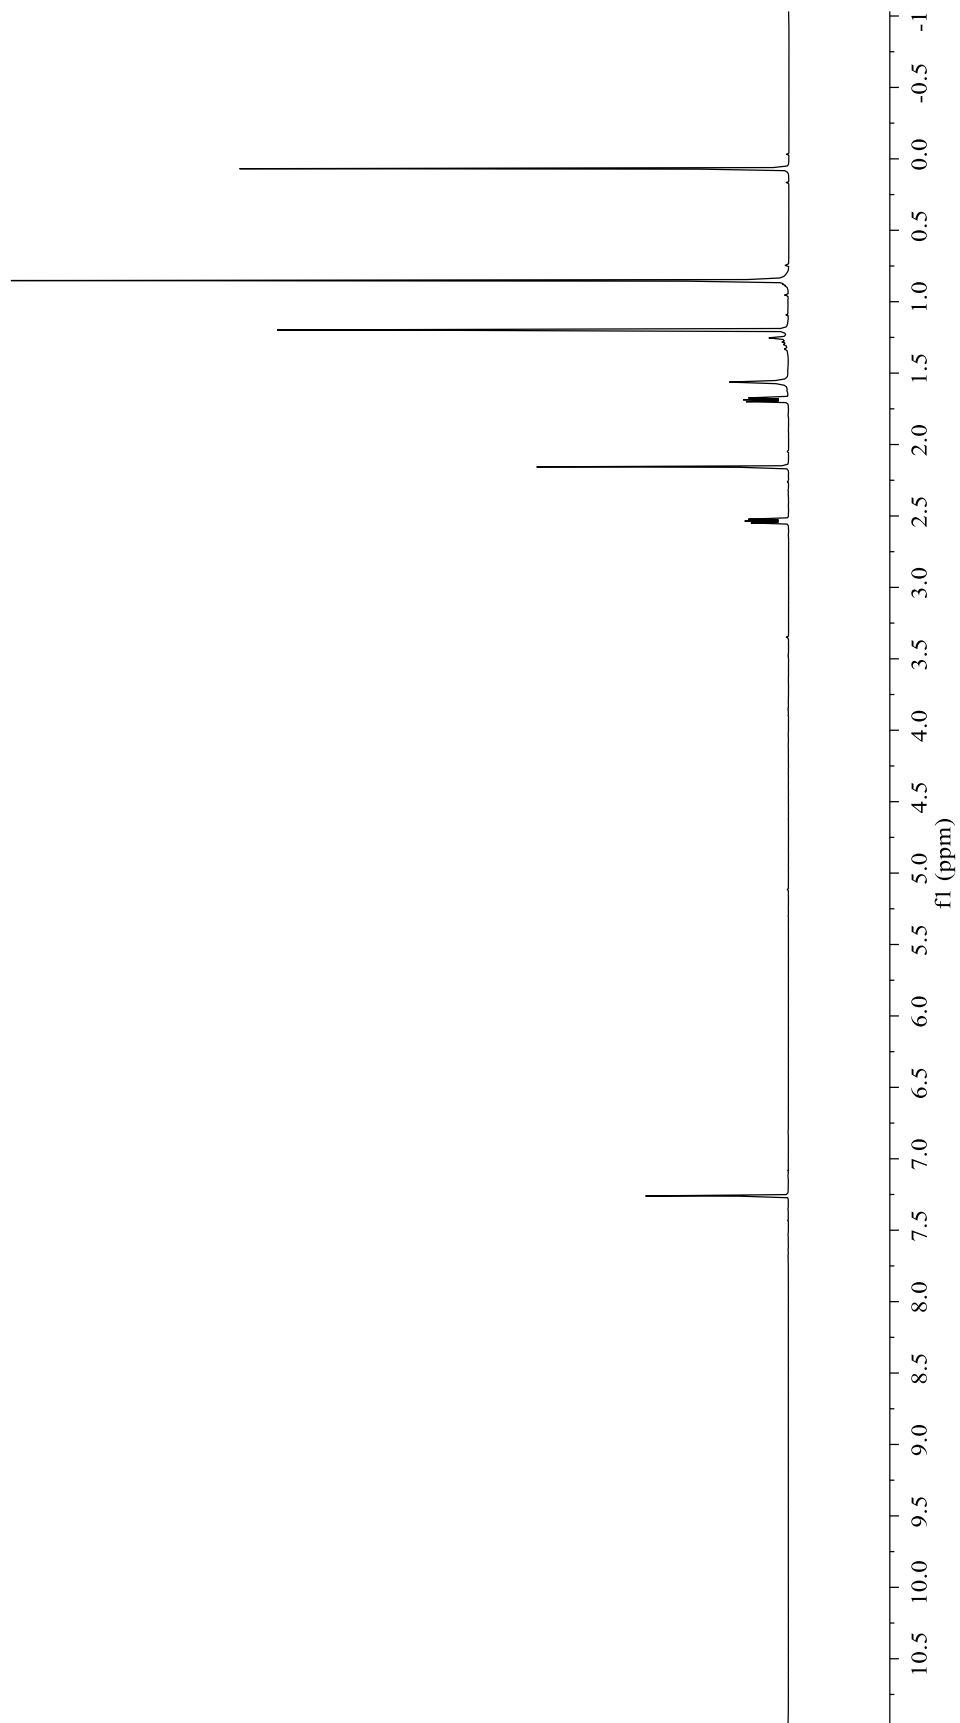



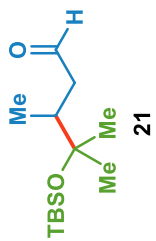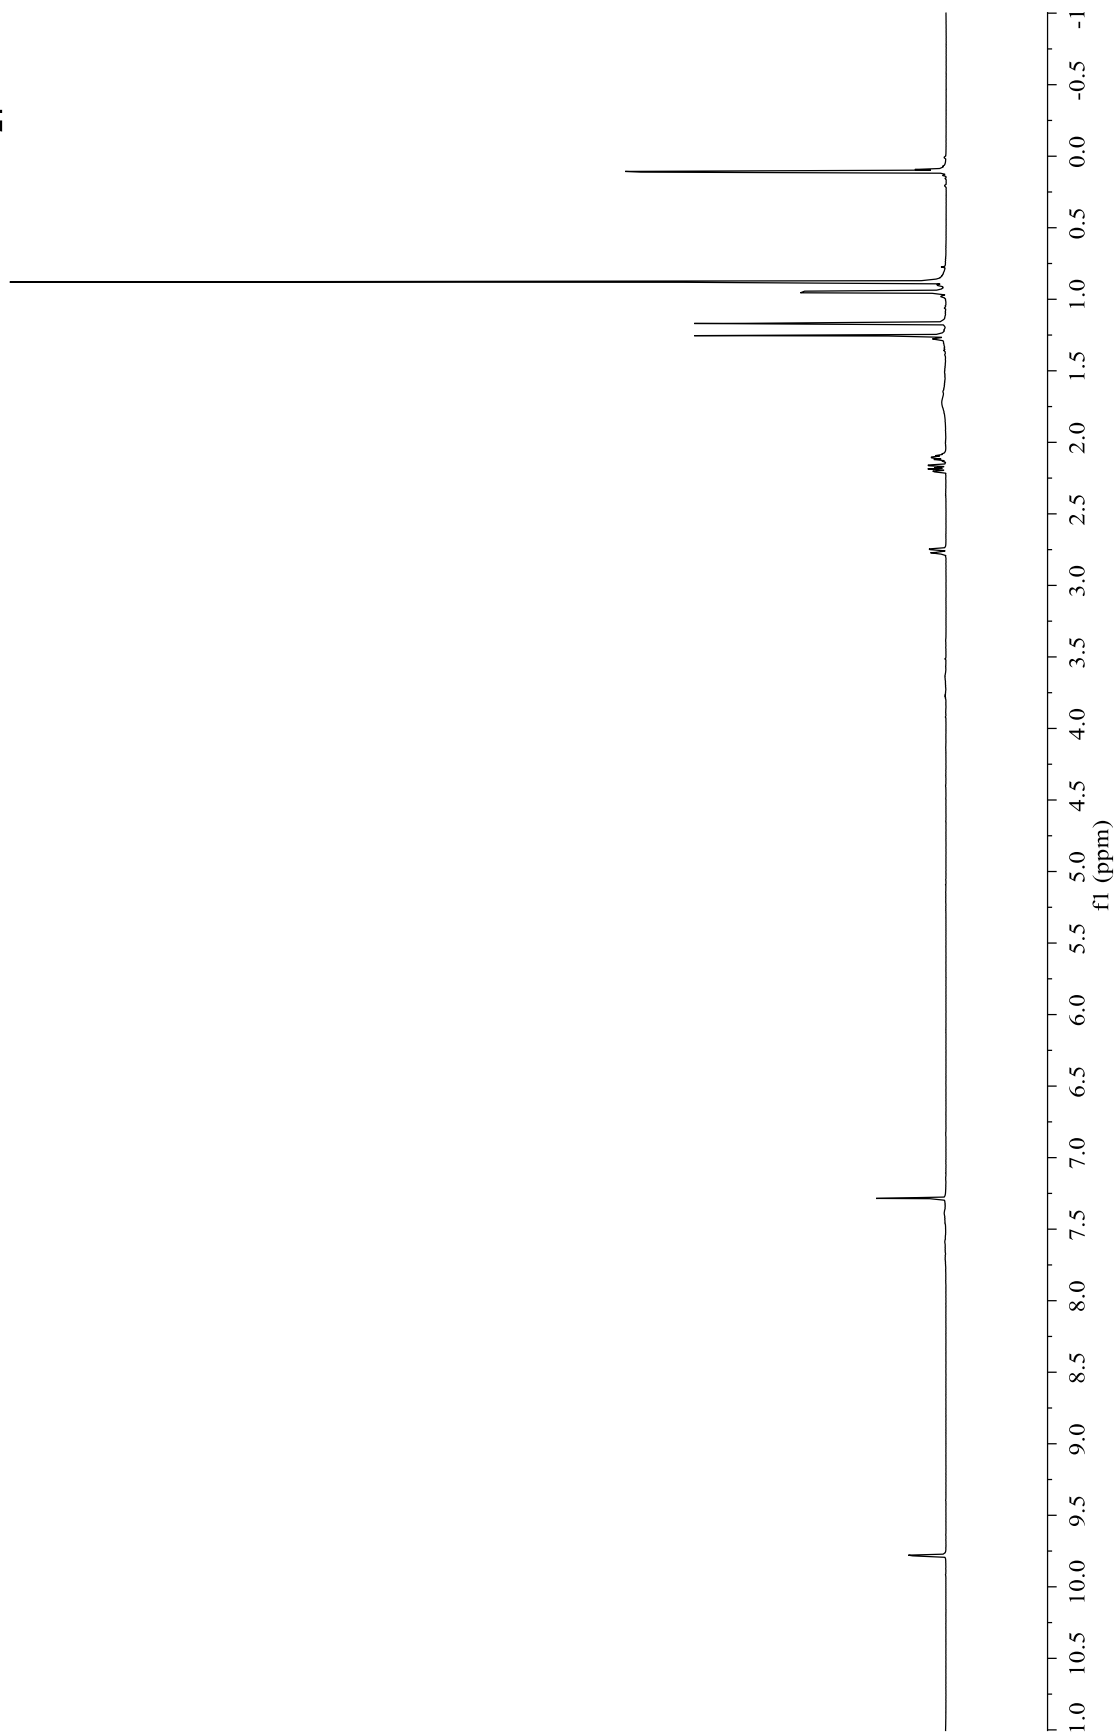

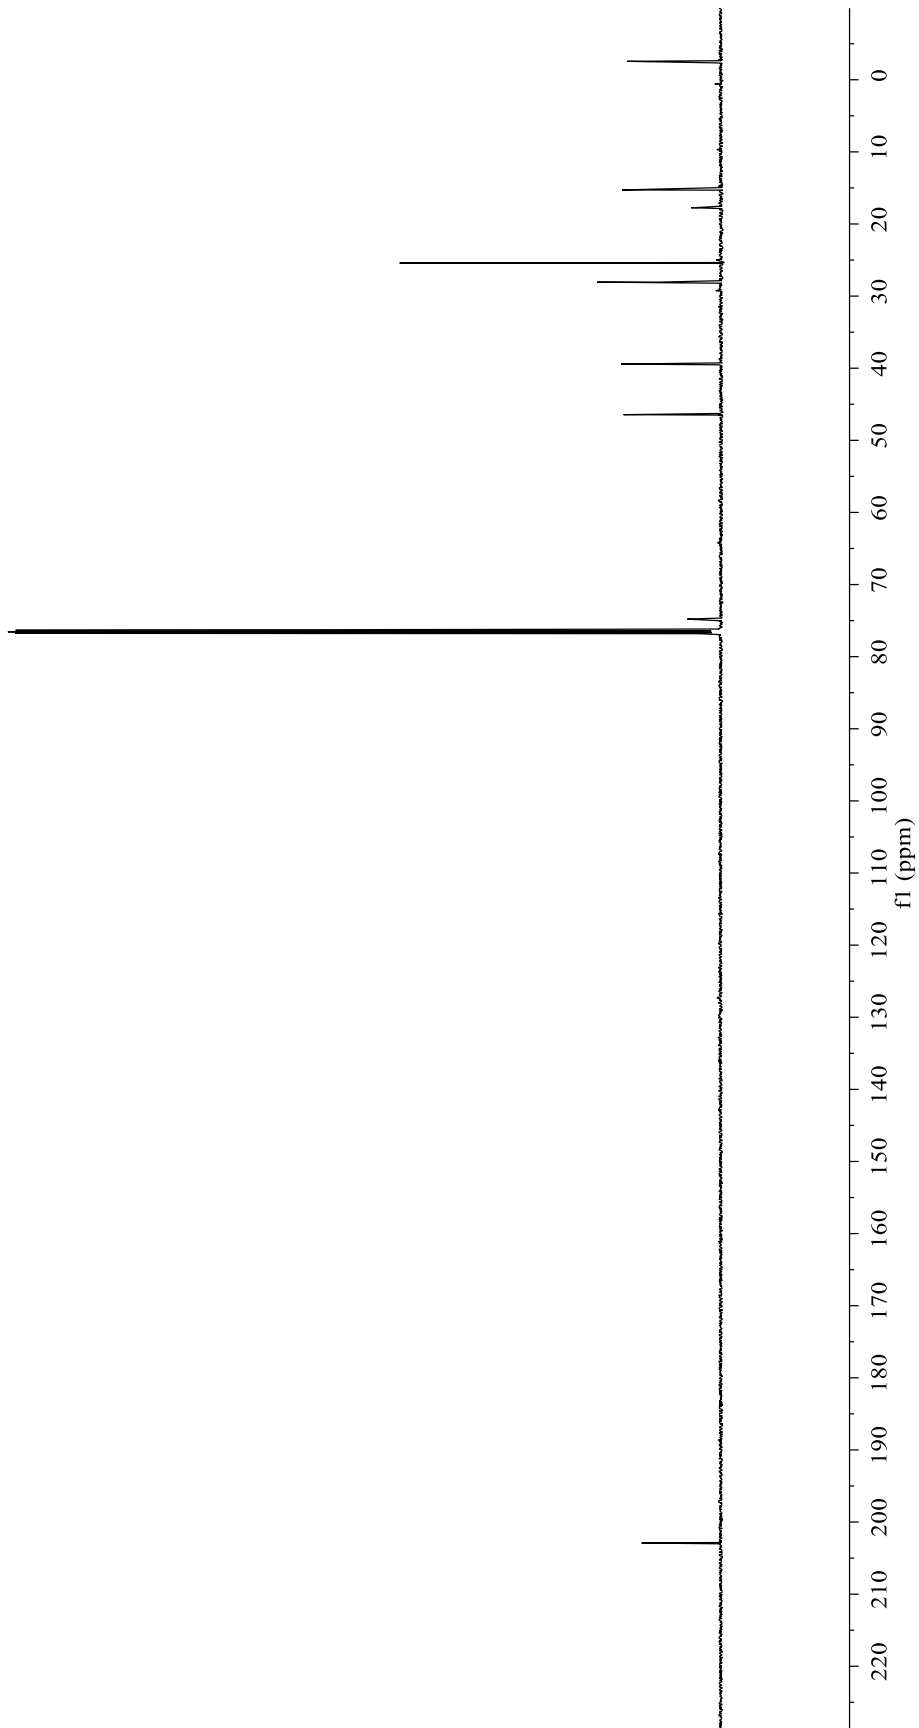

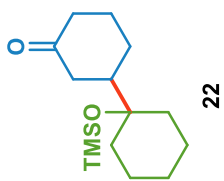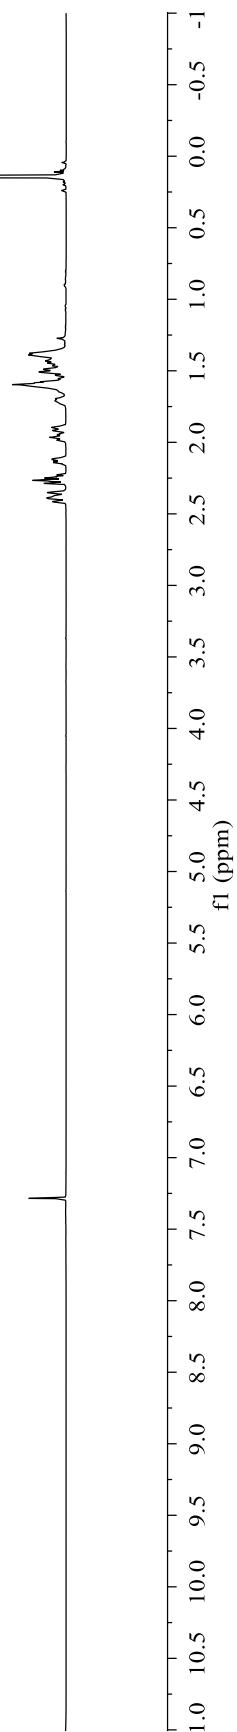



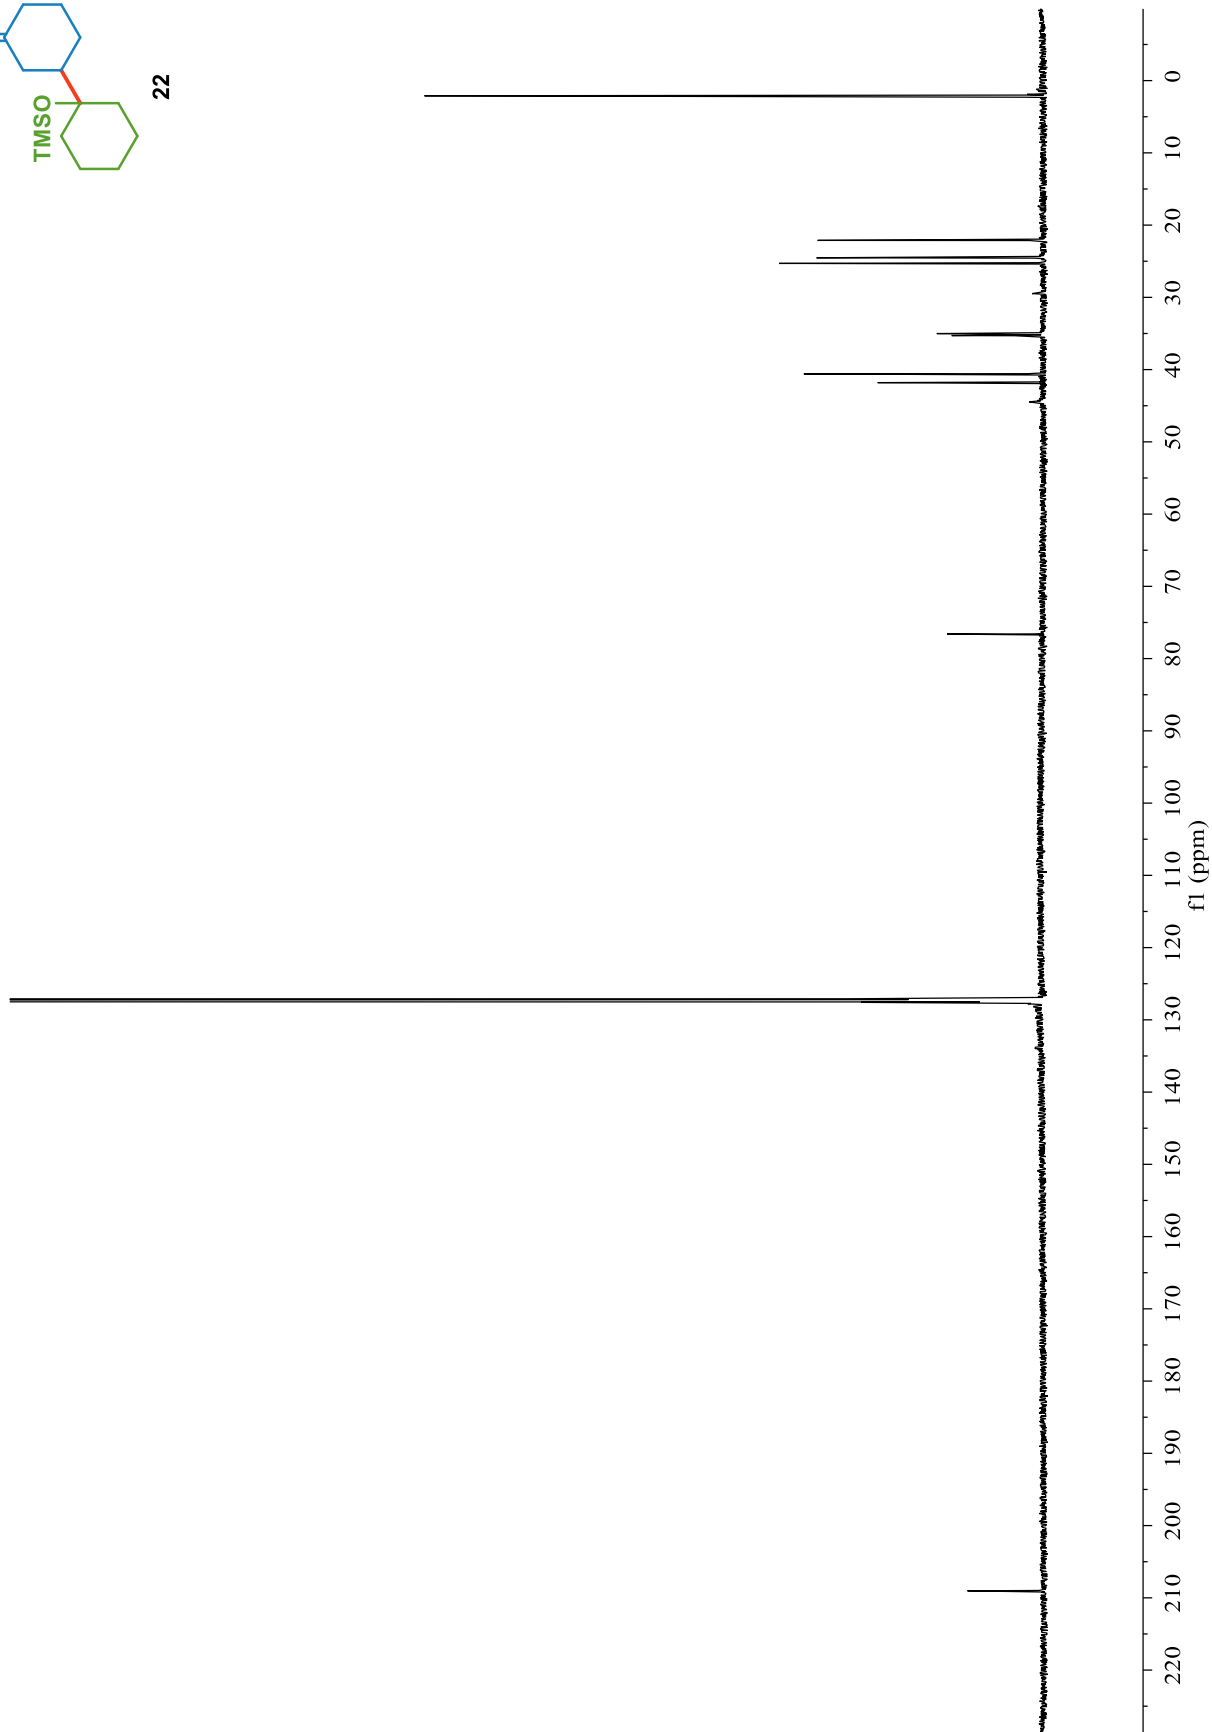

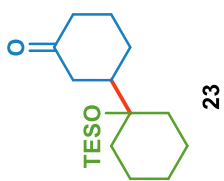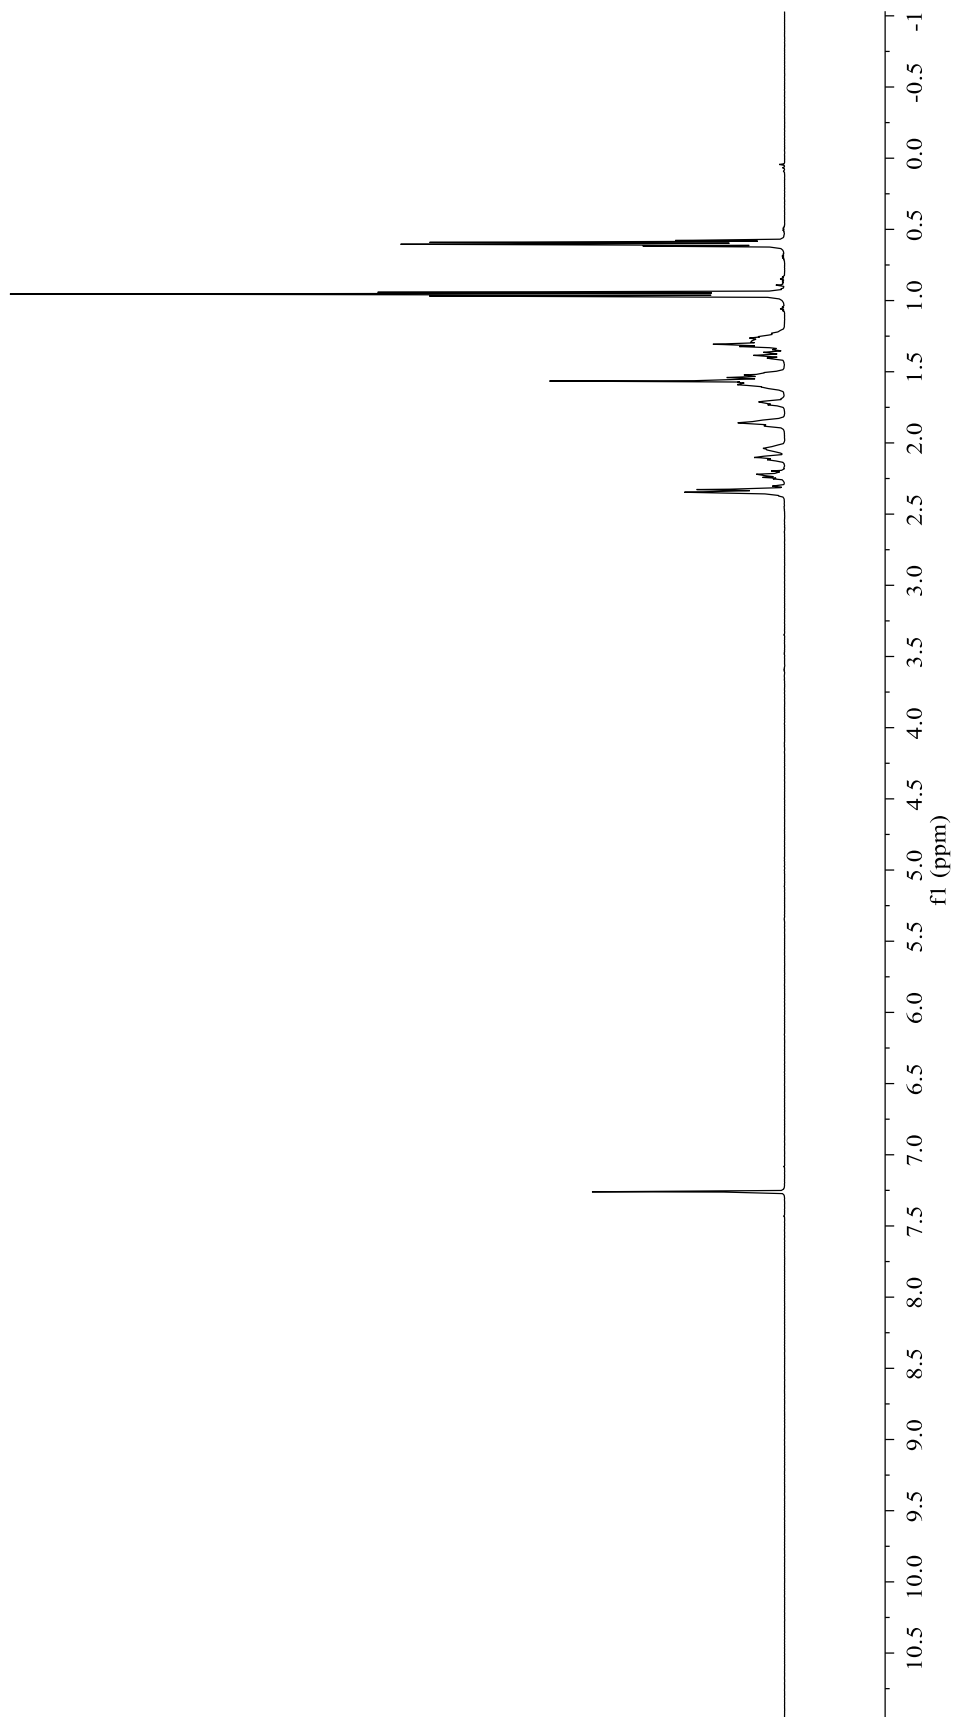

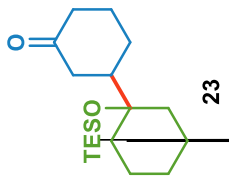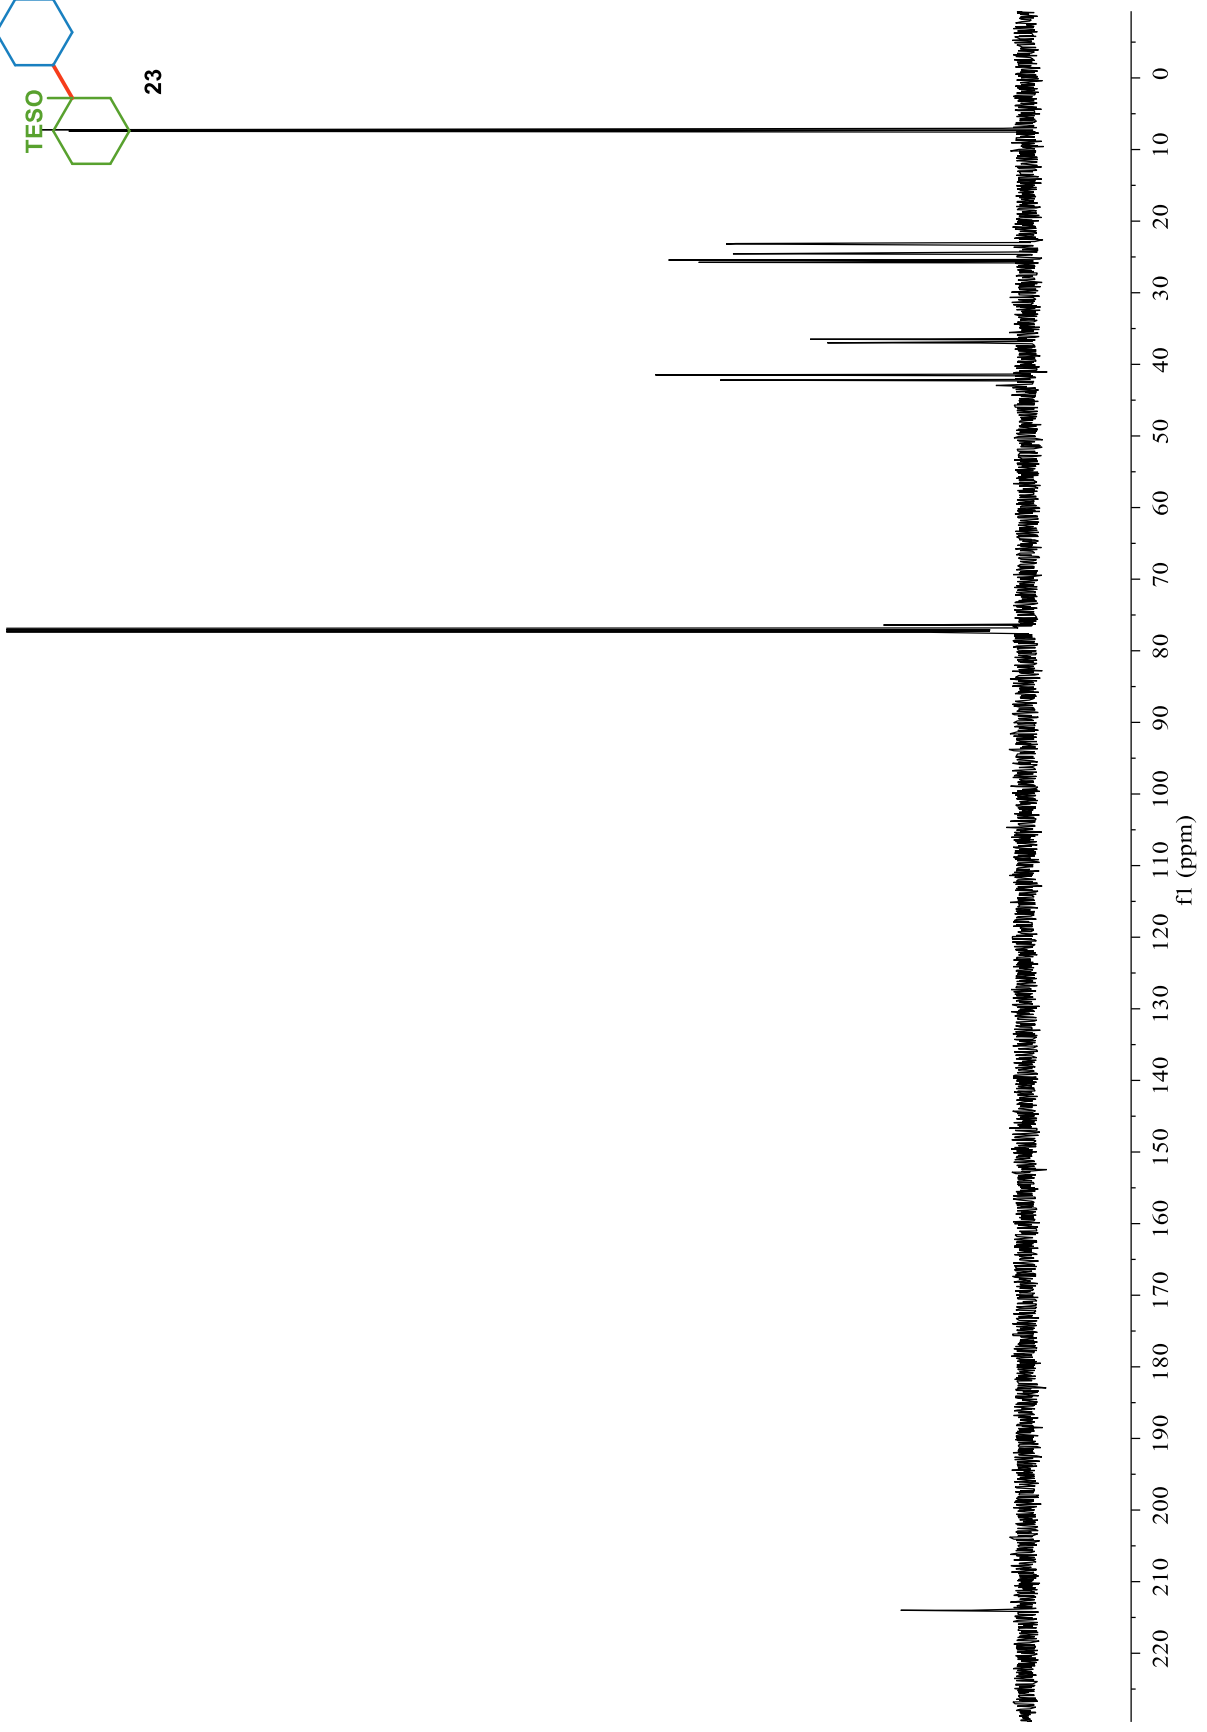

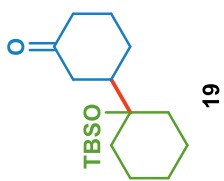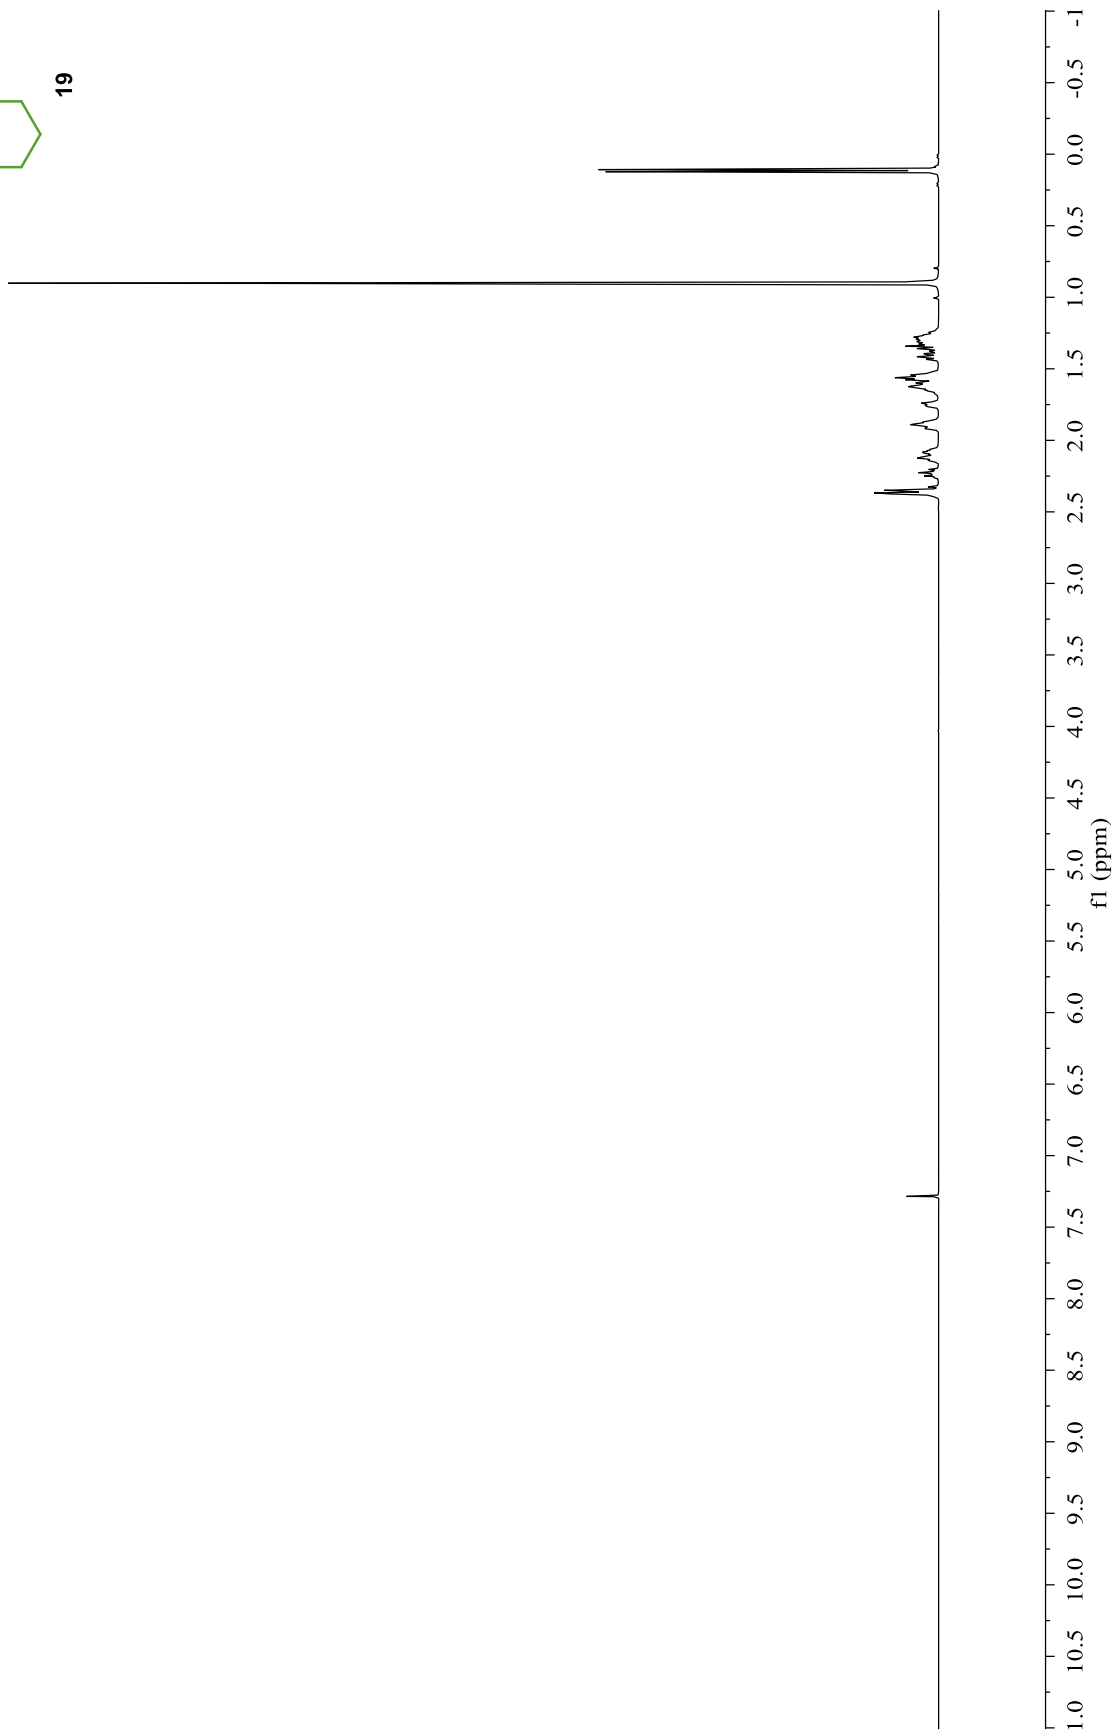

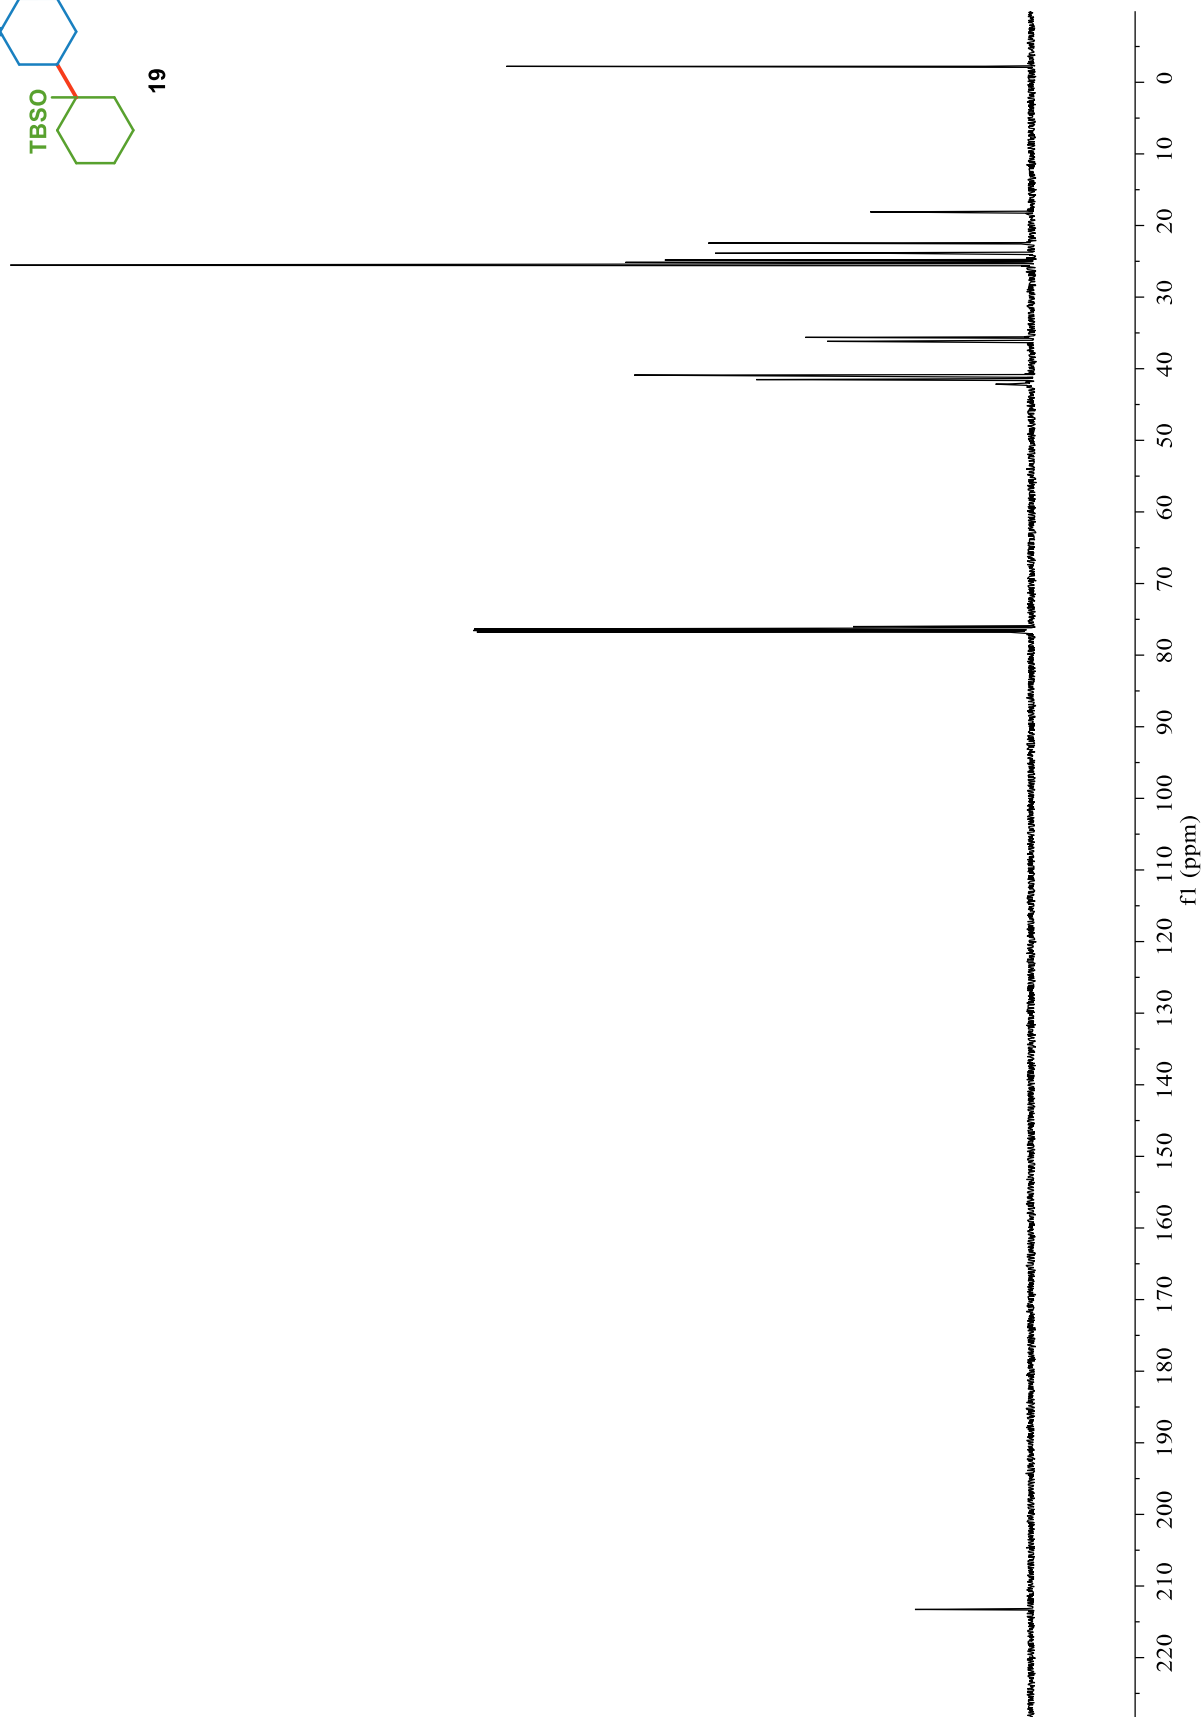

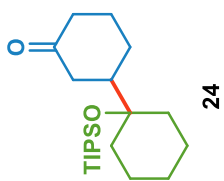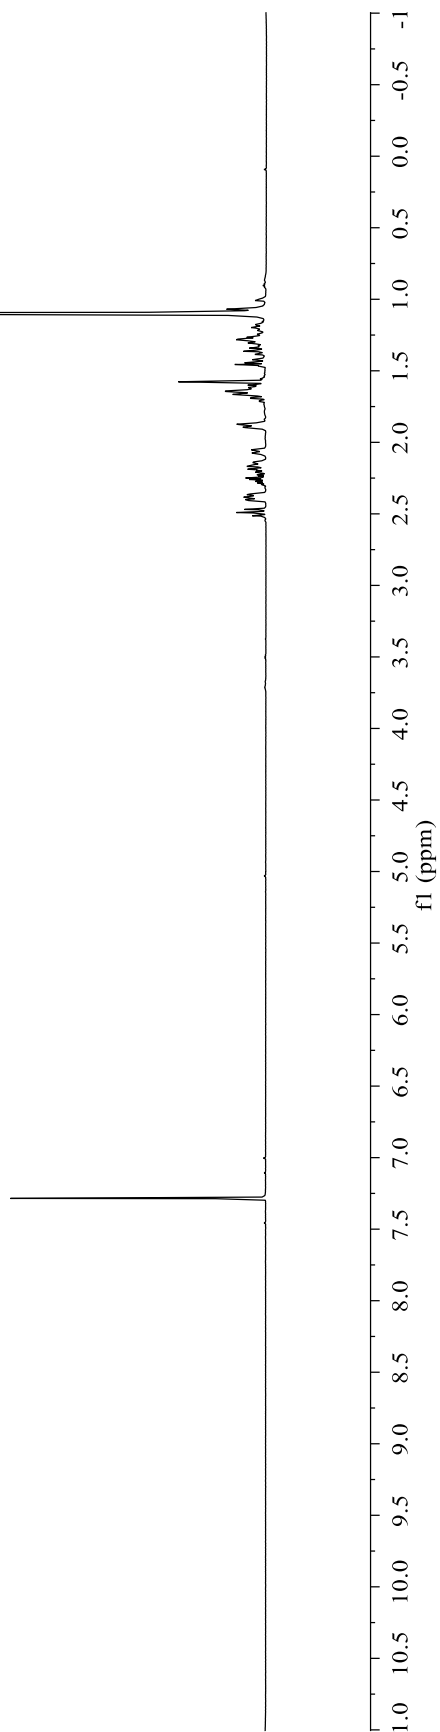

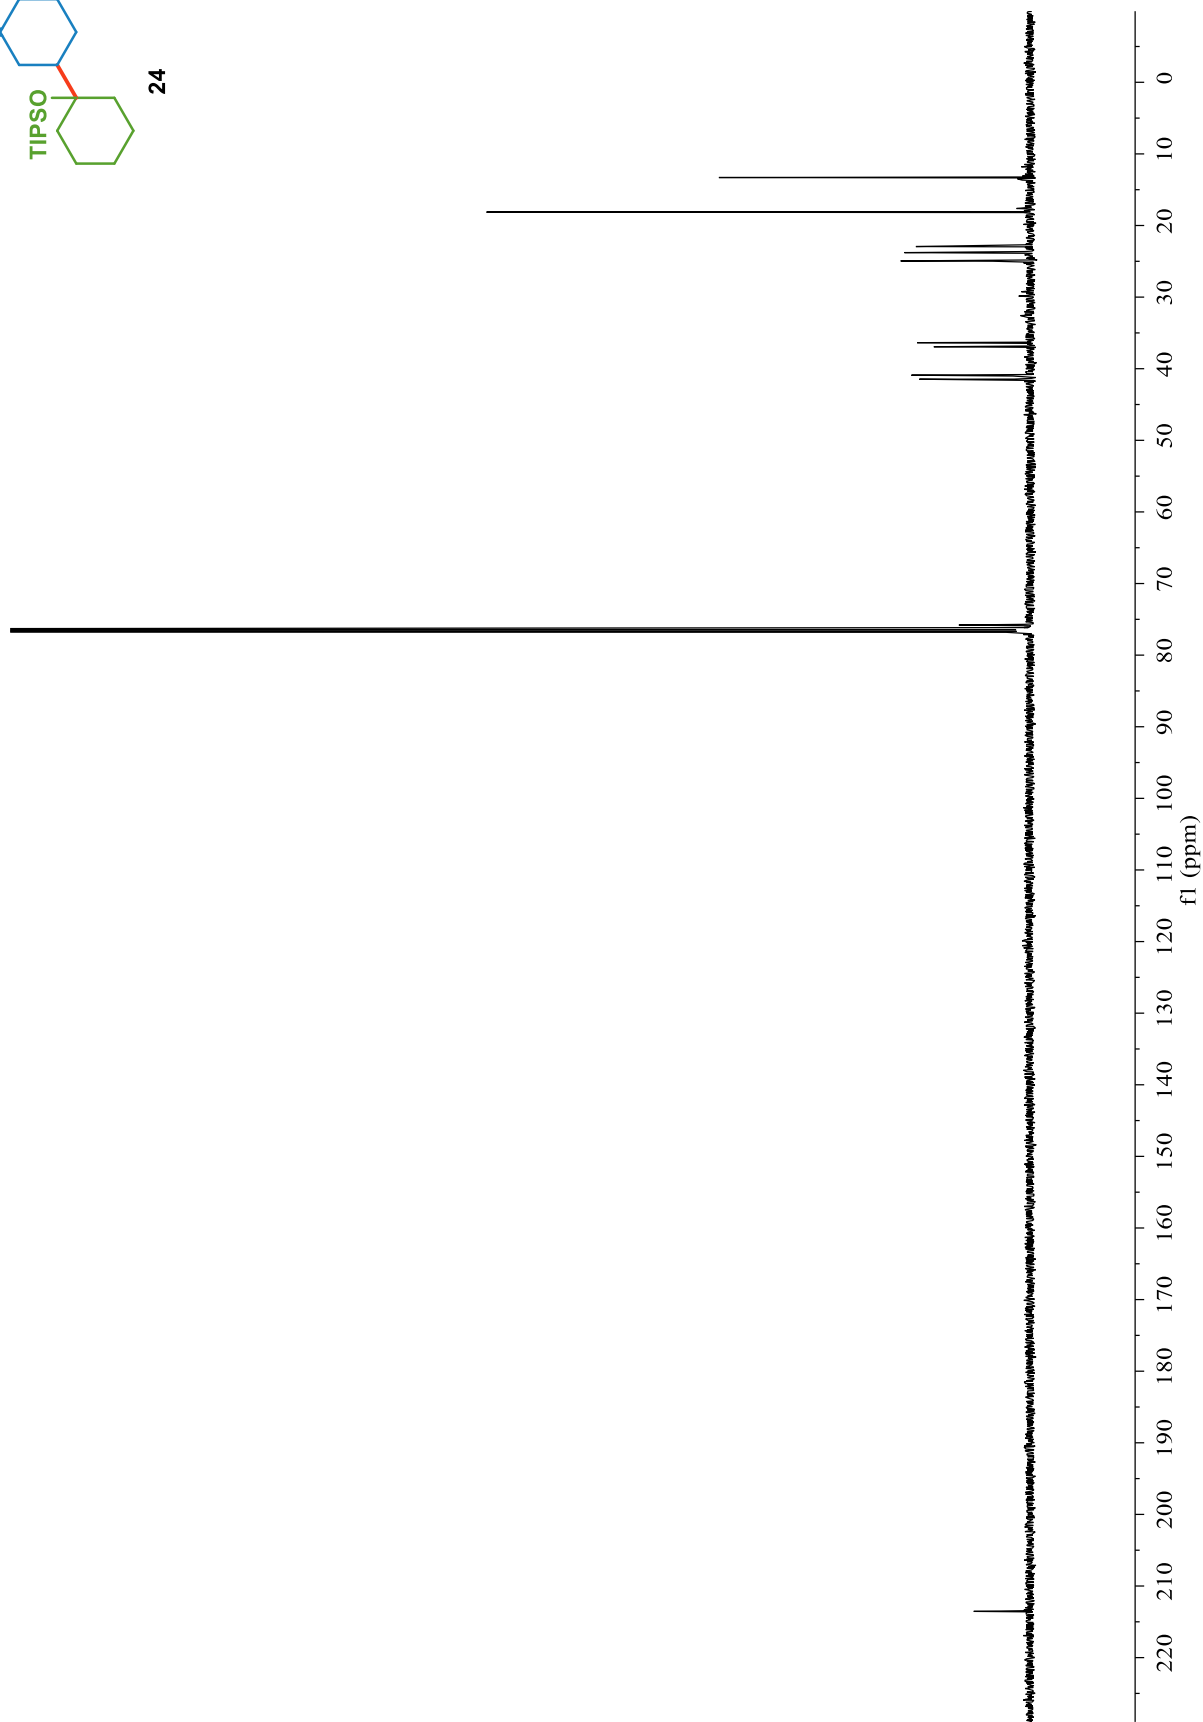

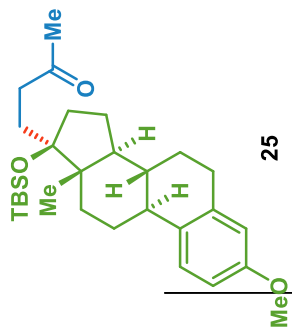

25

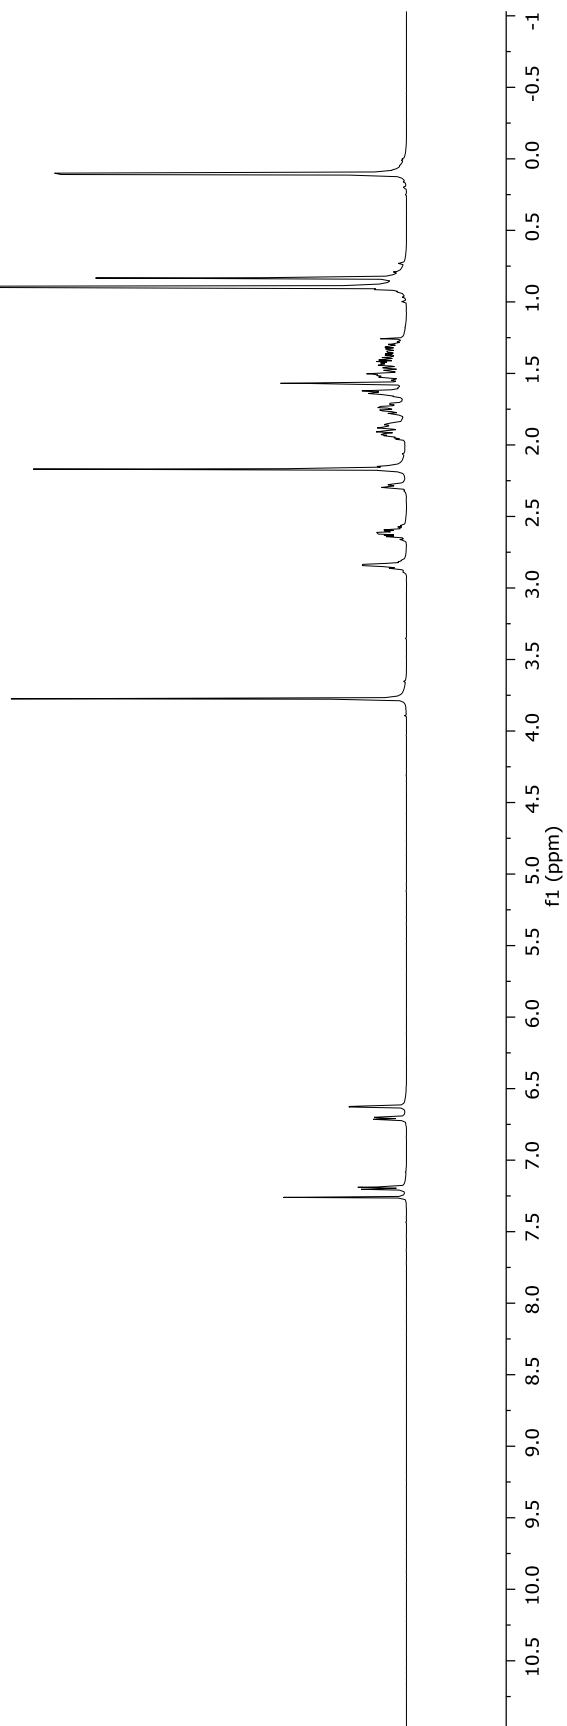



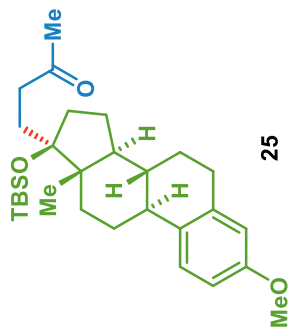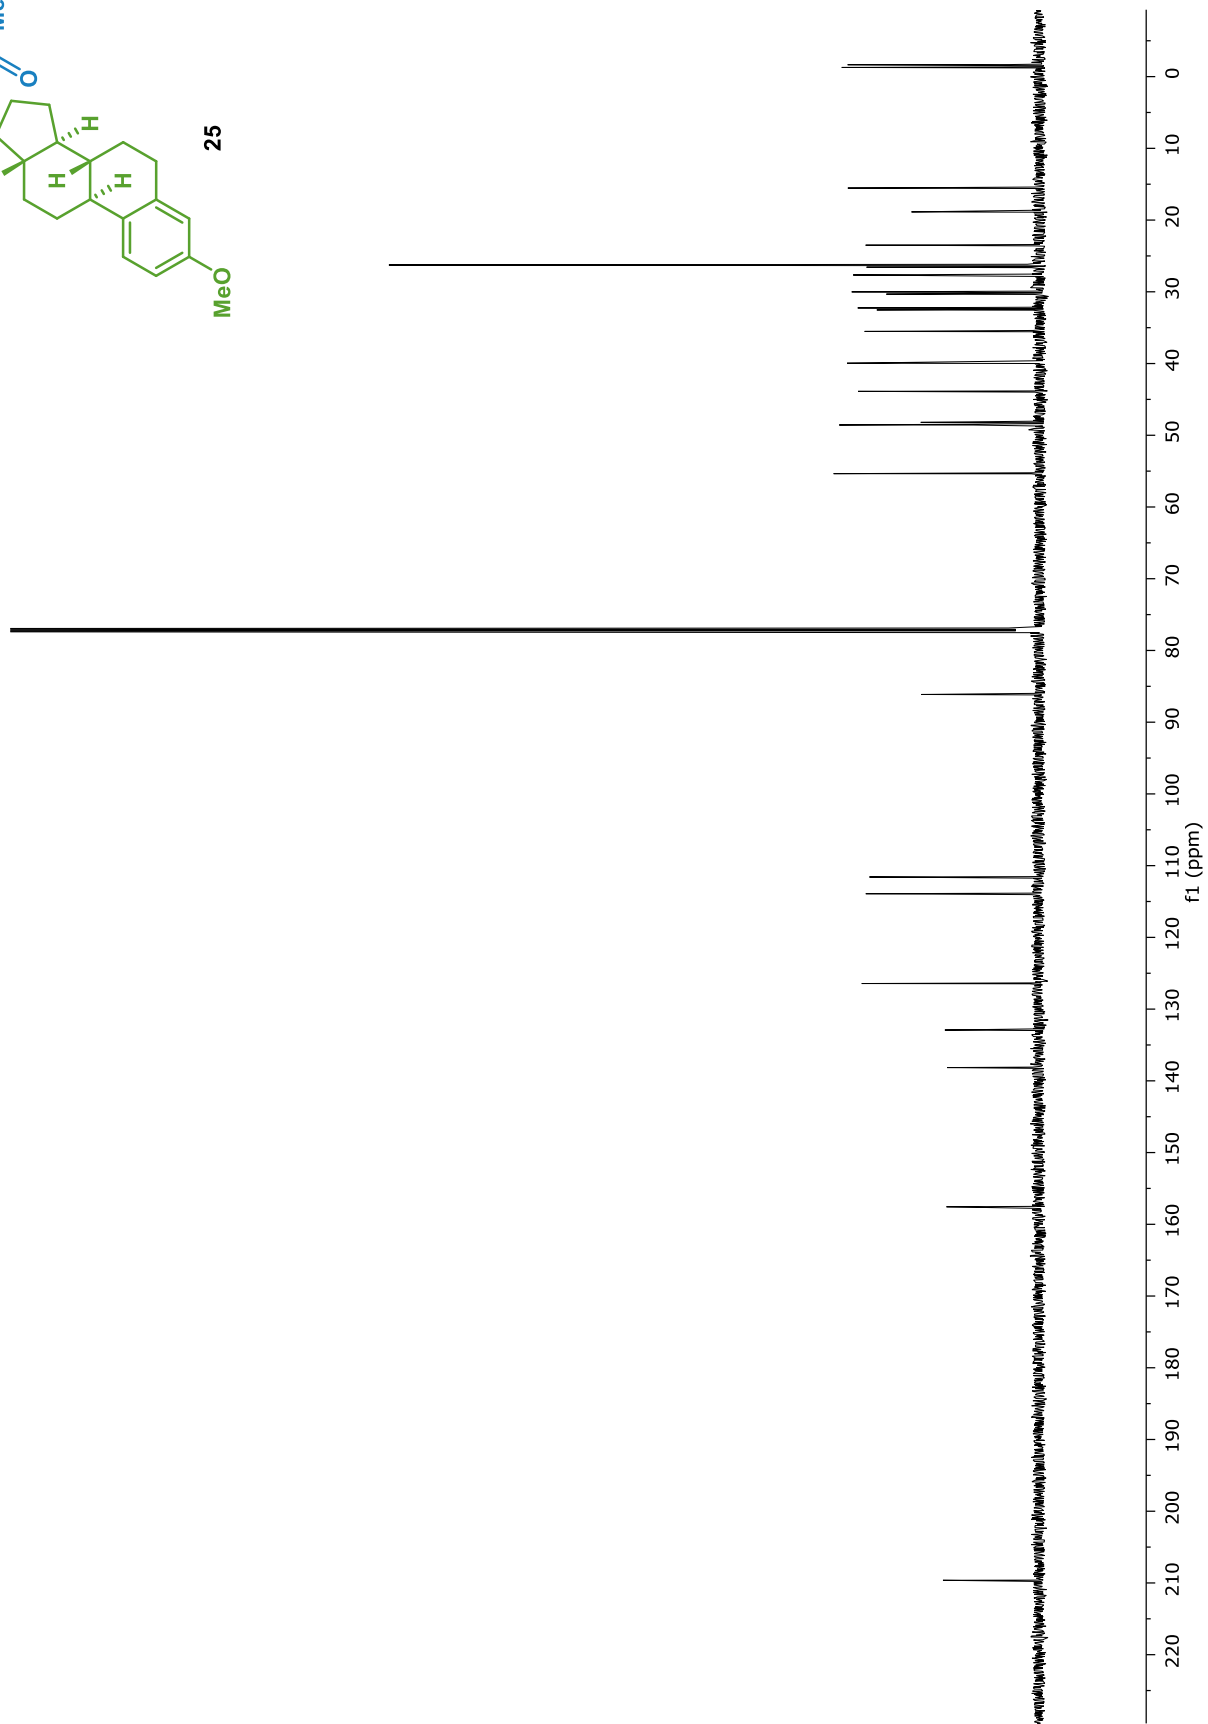

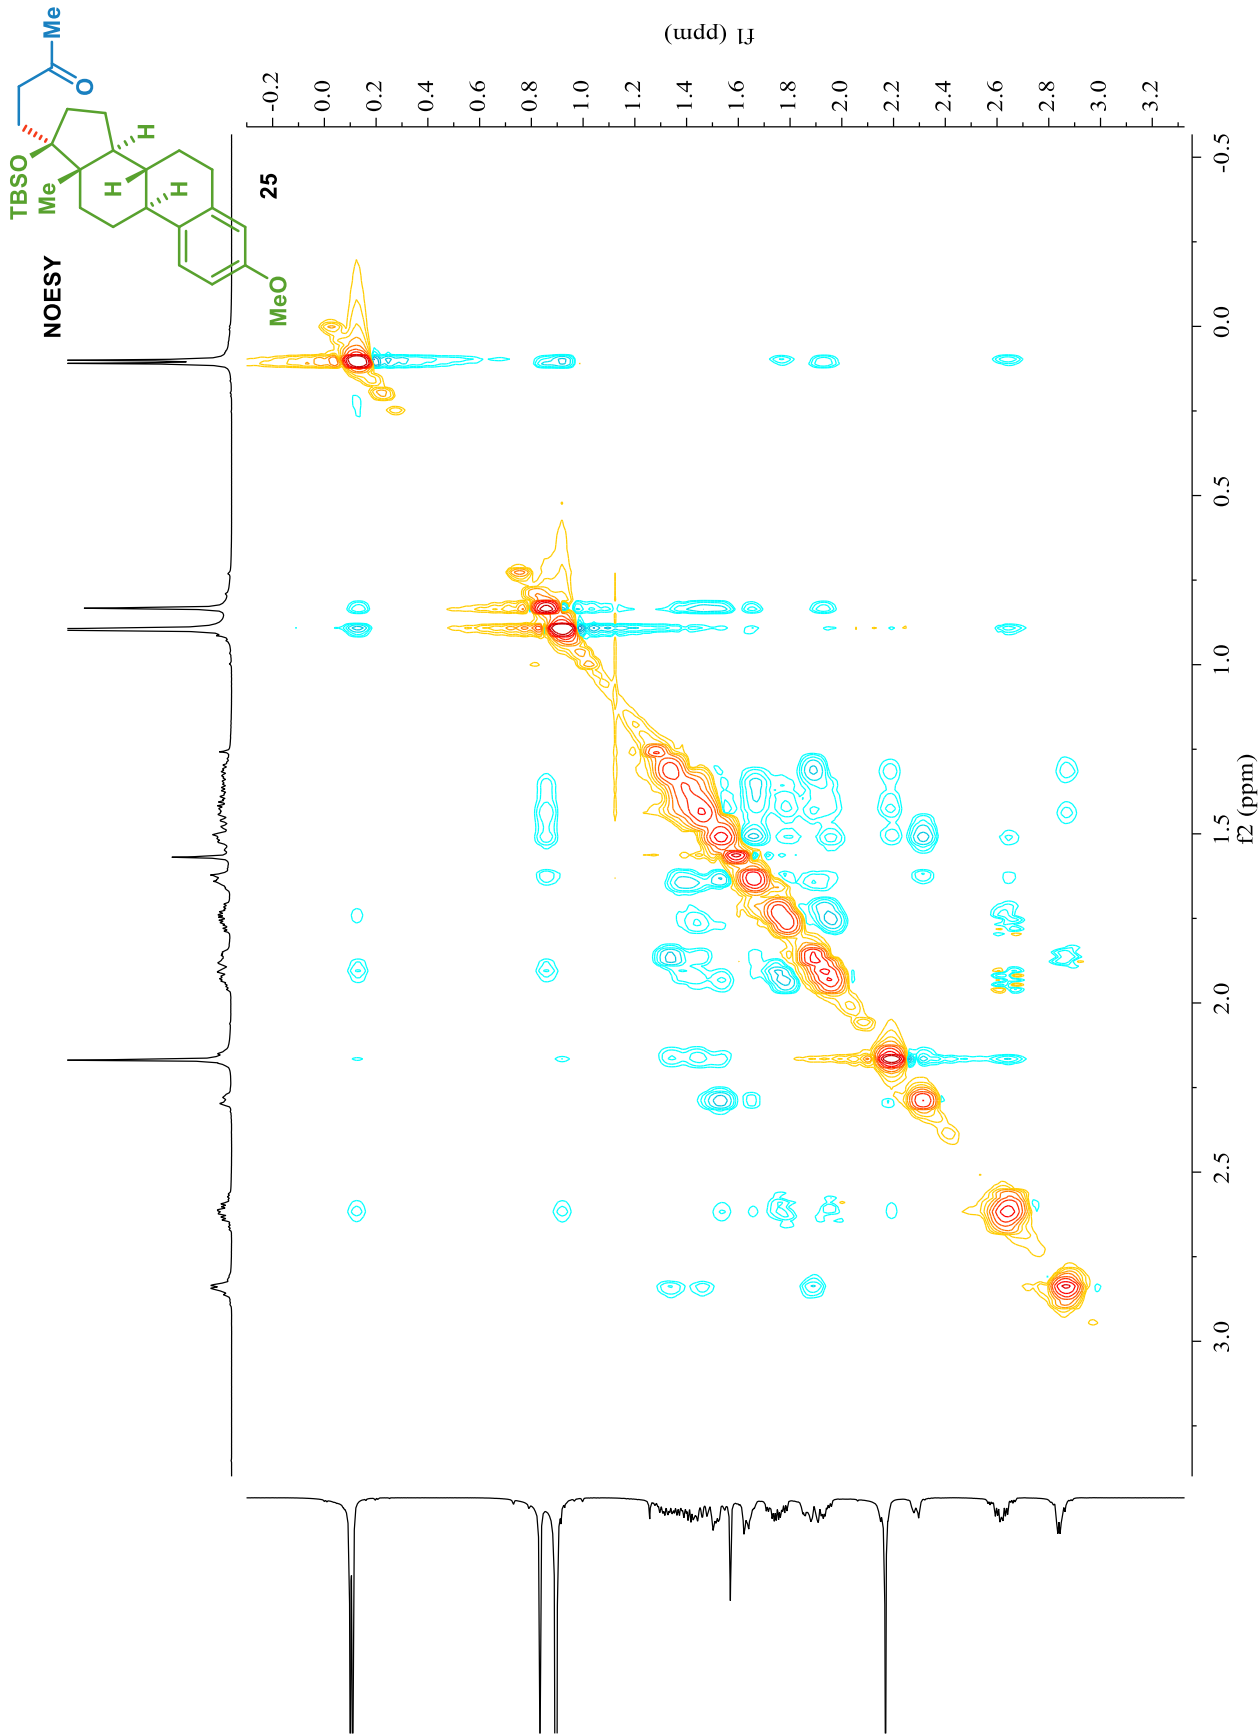

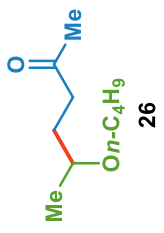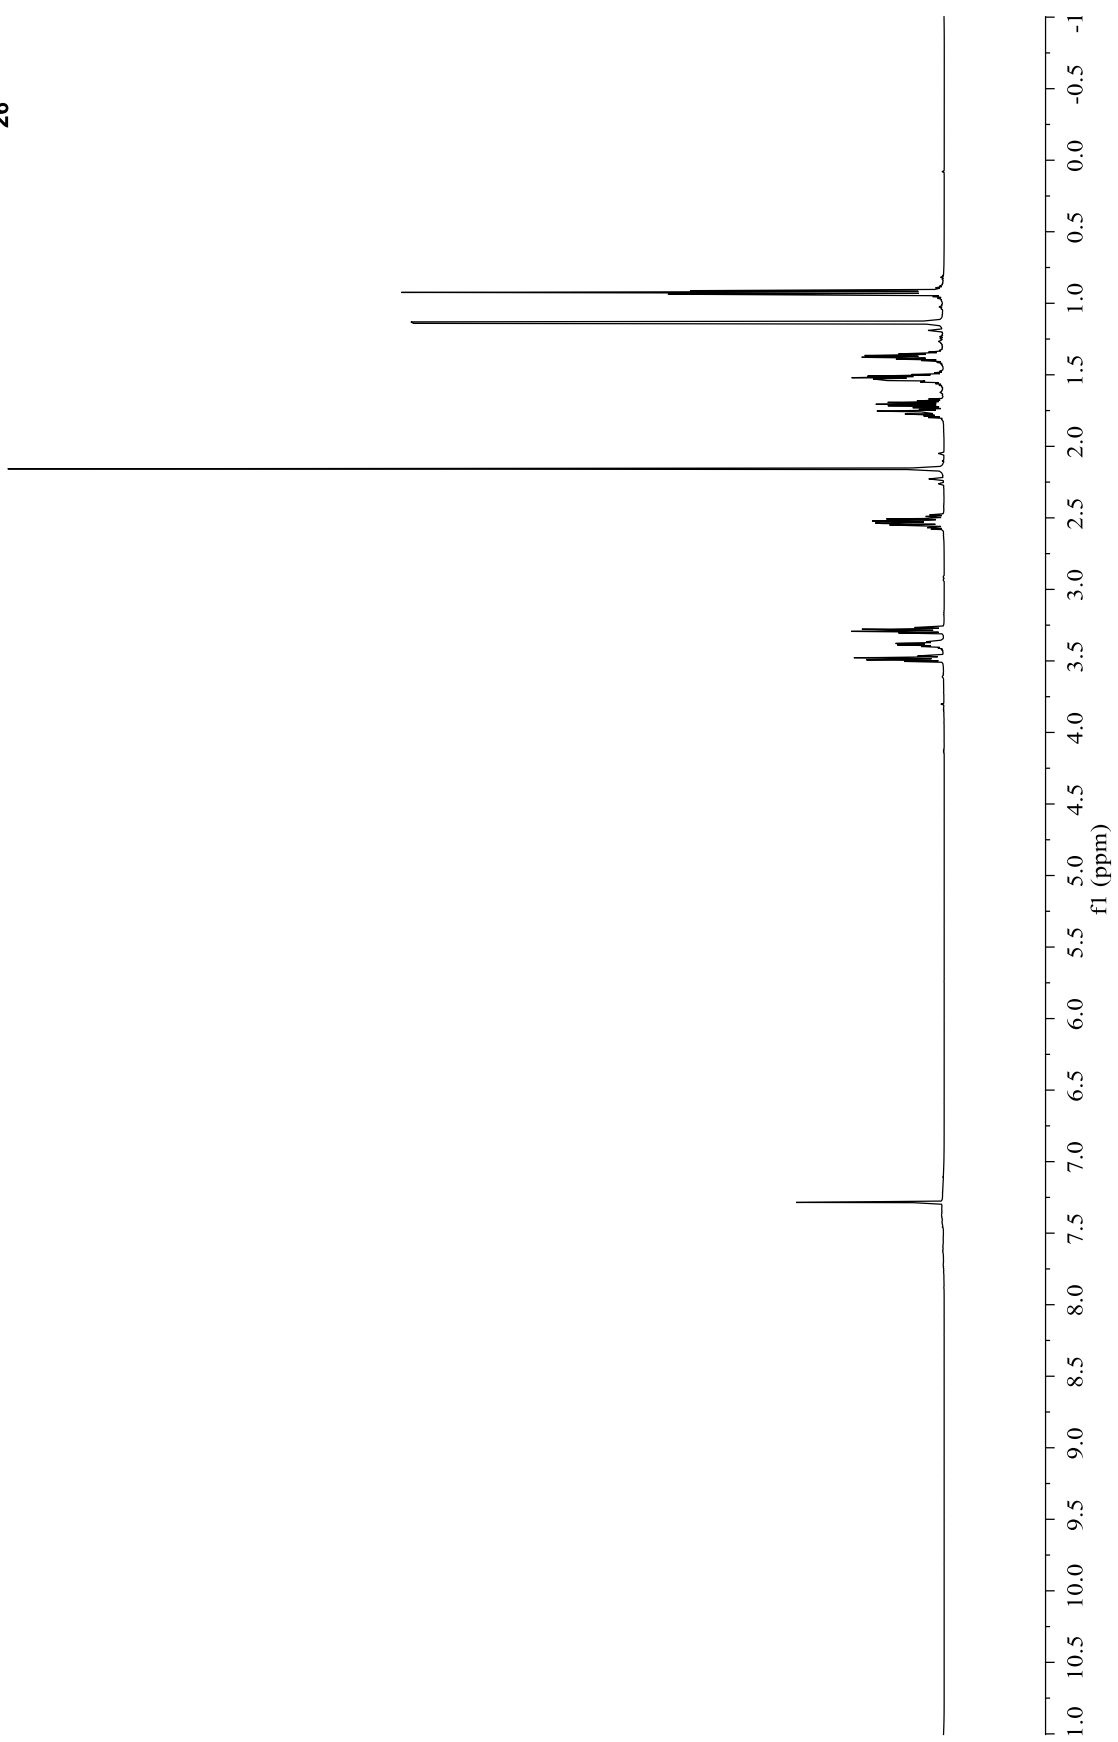

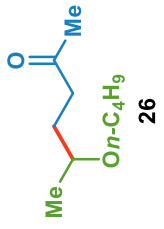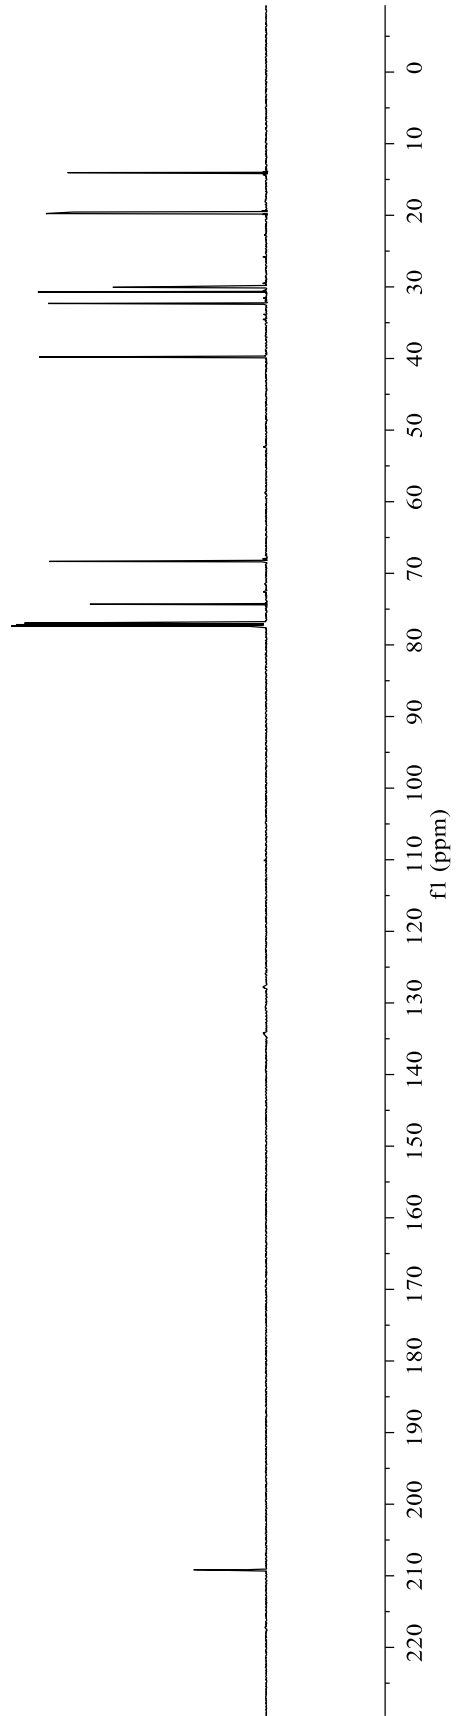

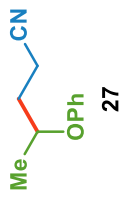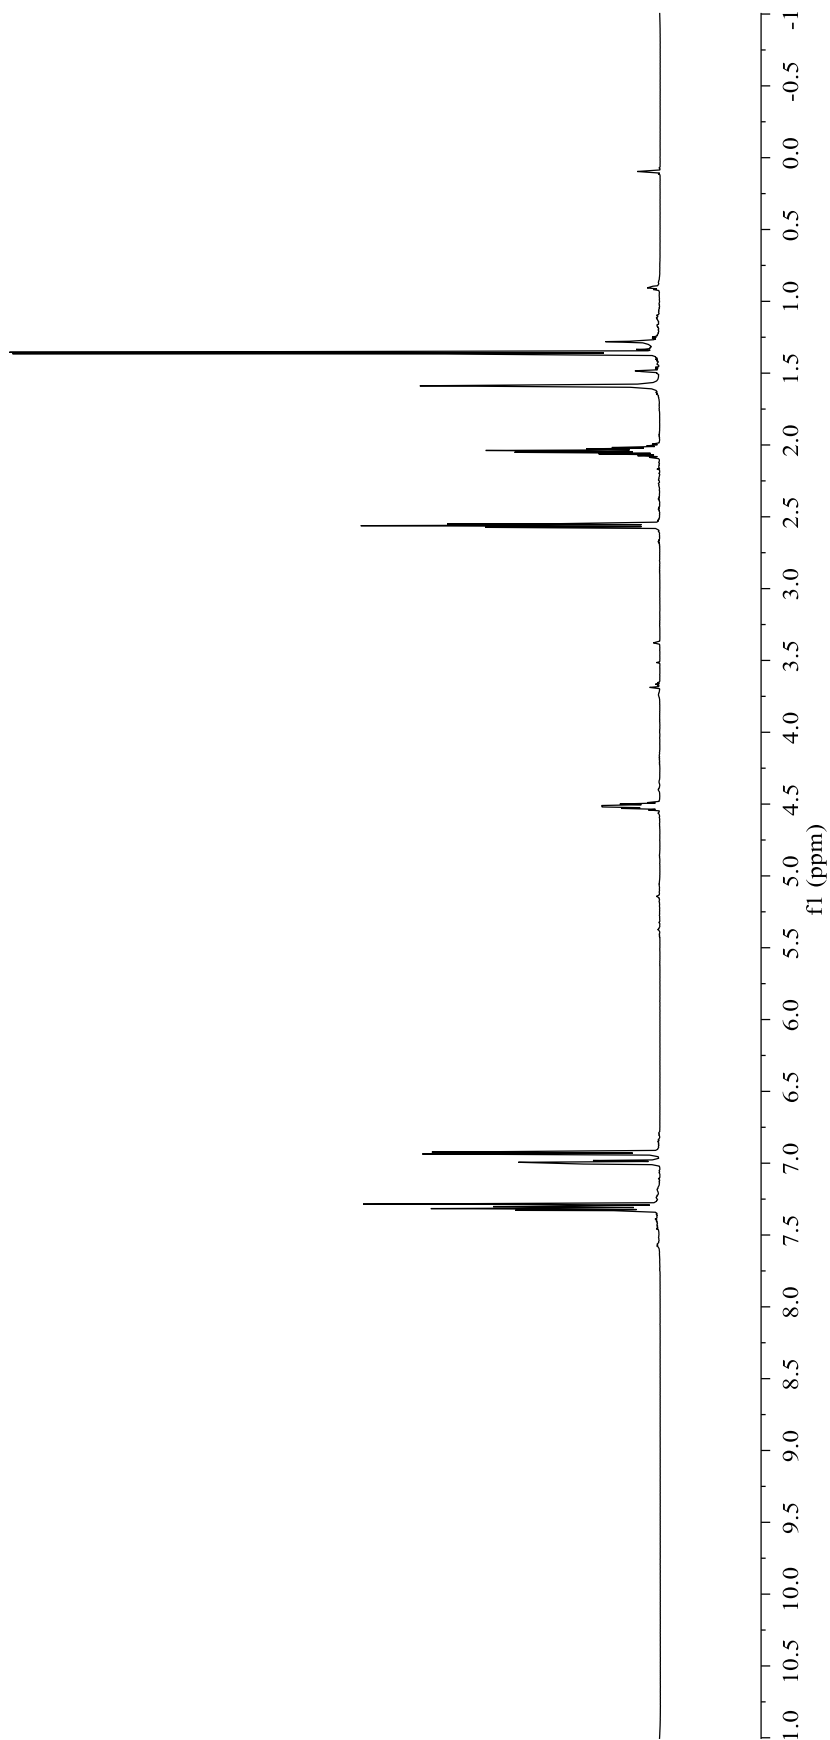

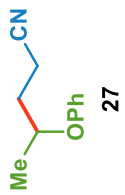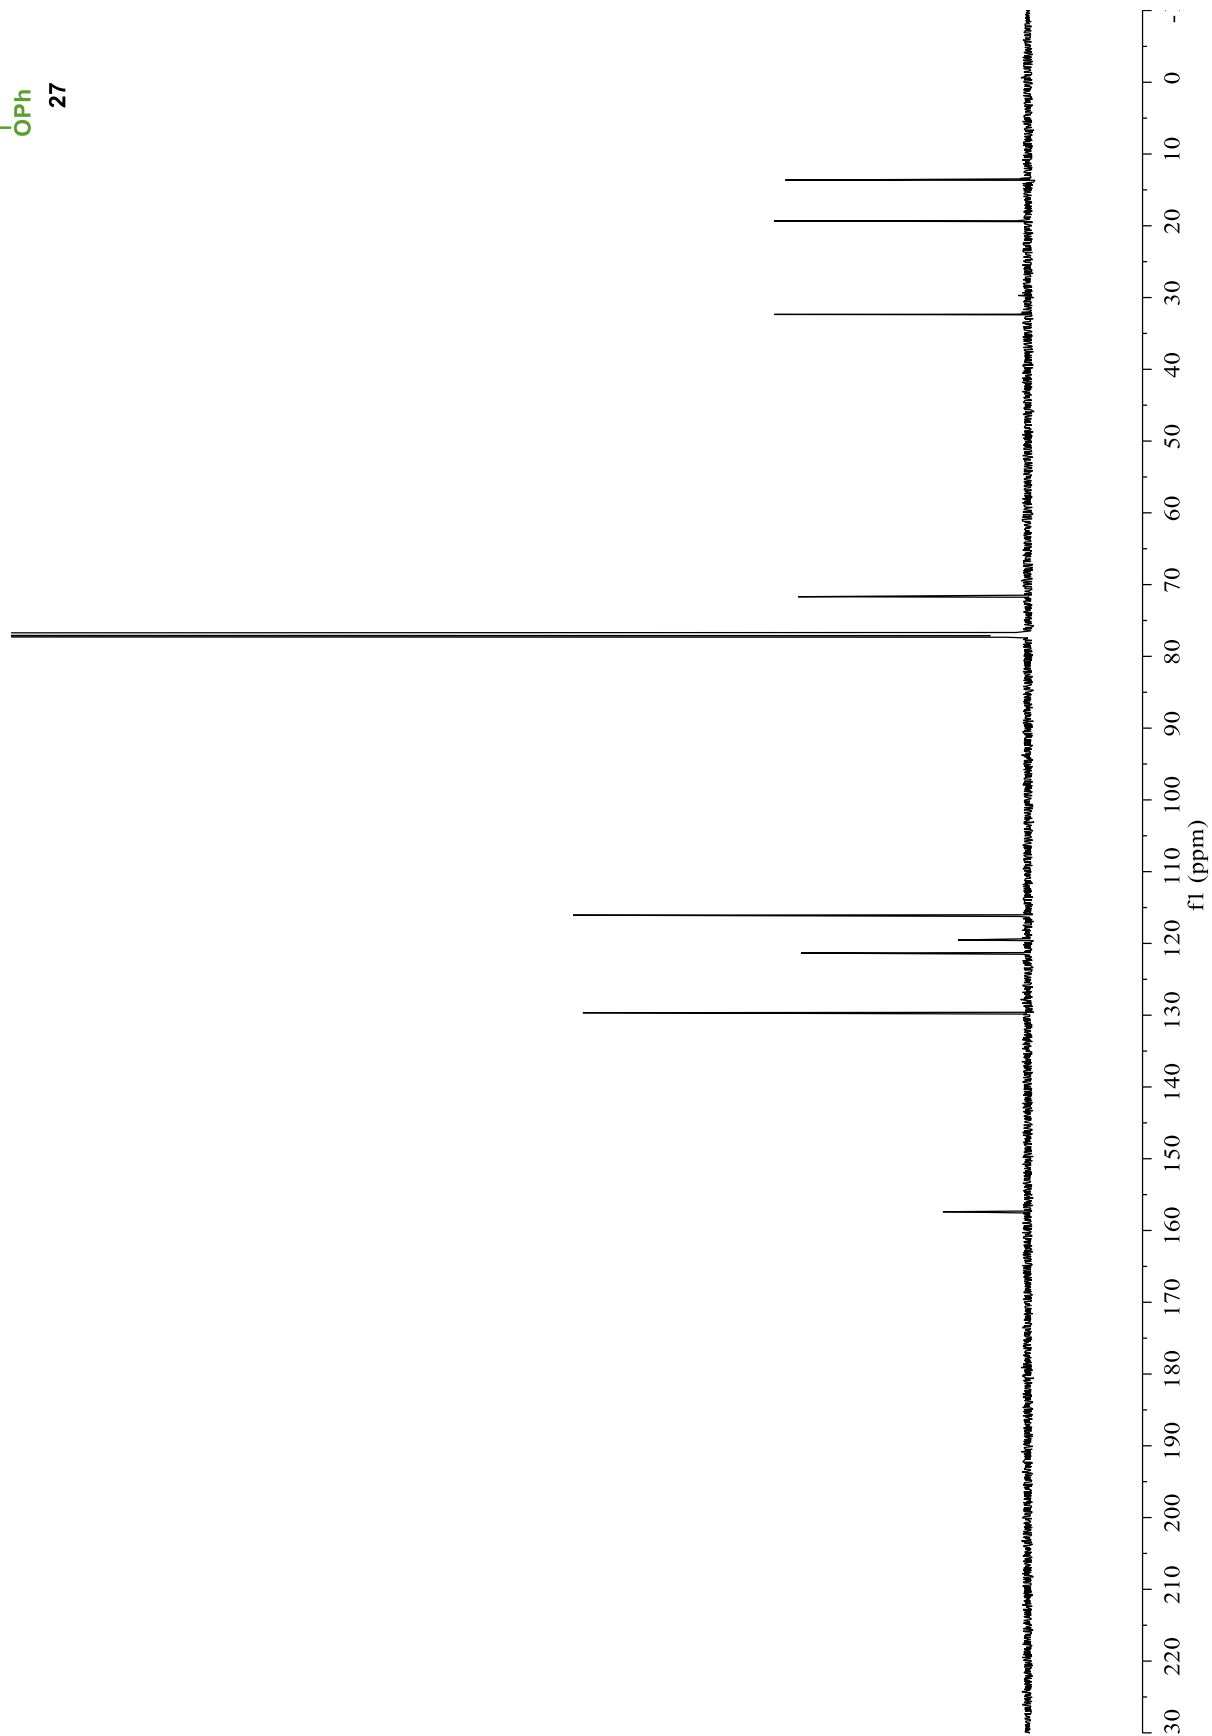

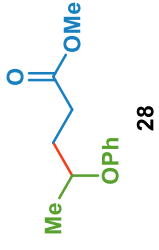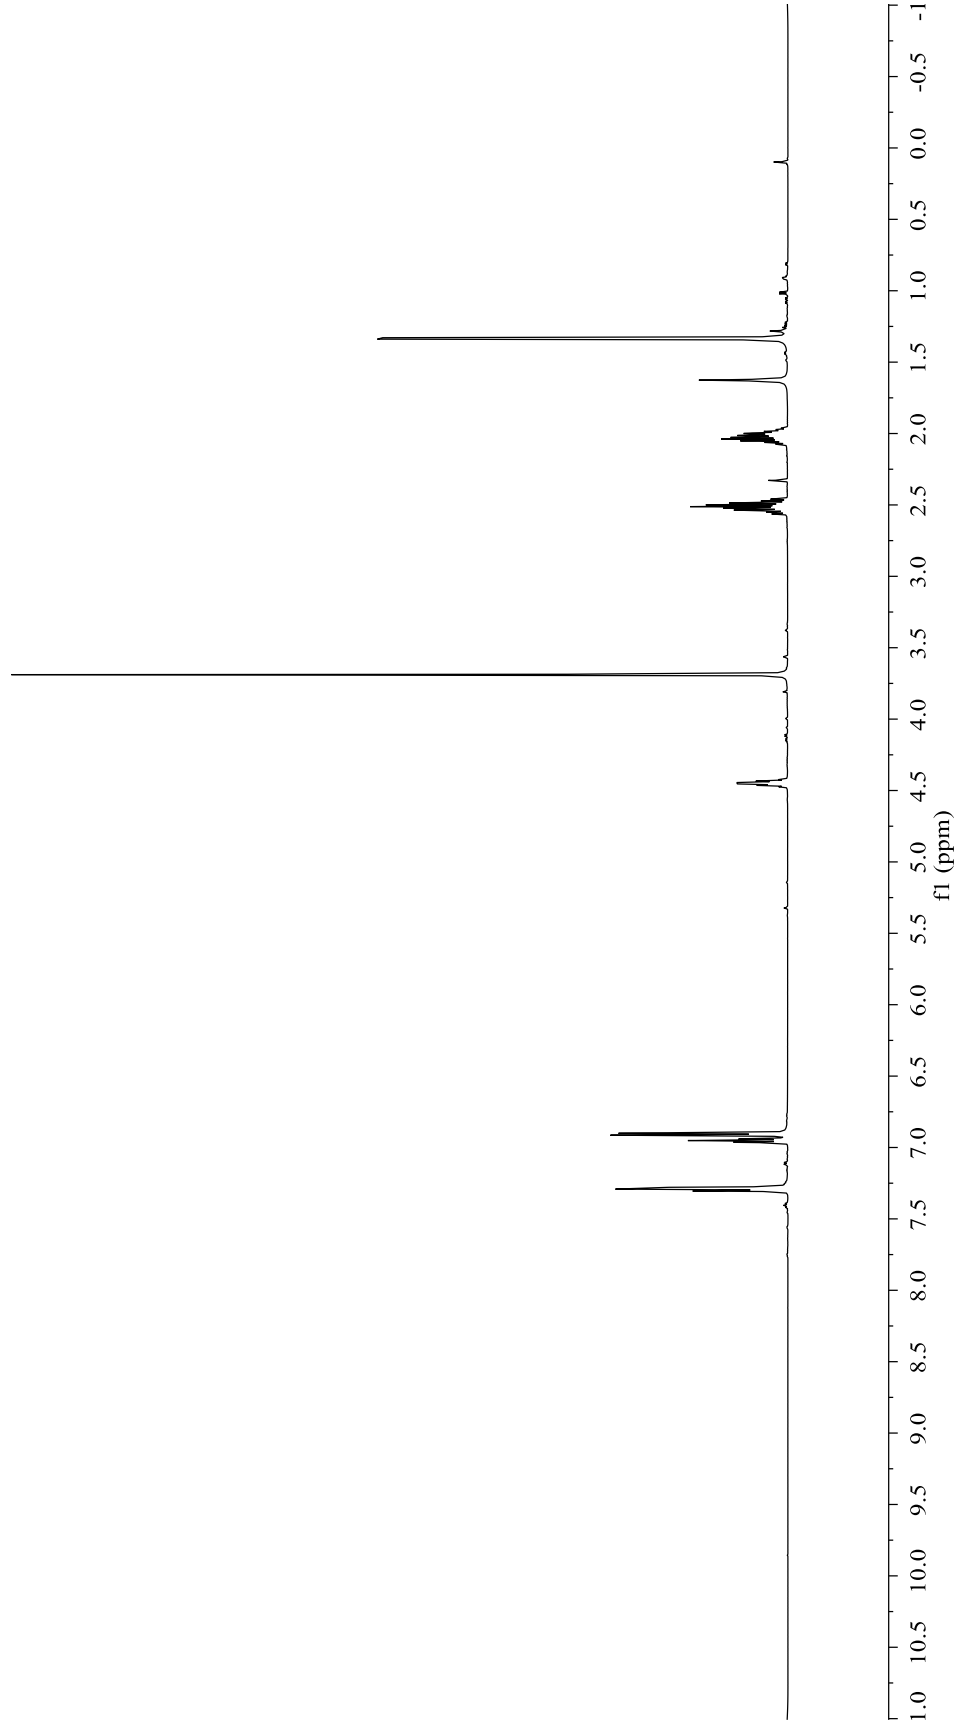

S108

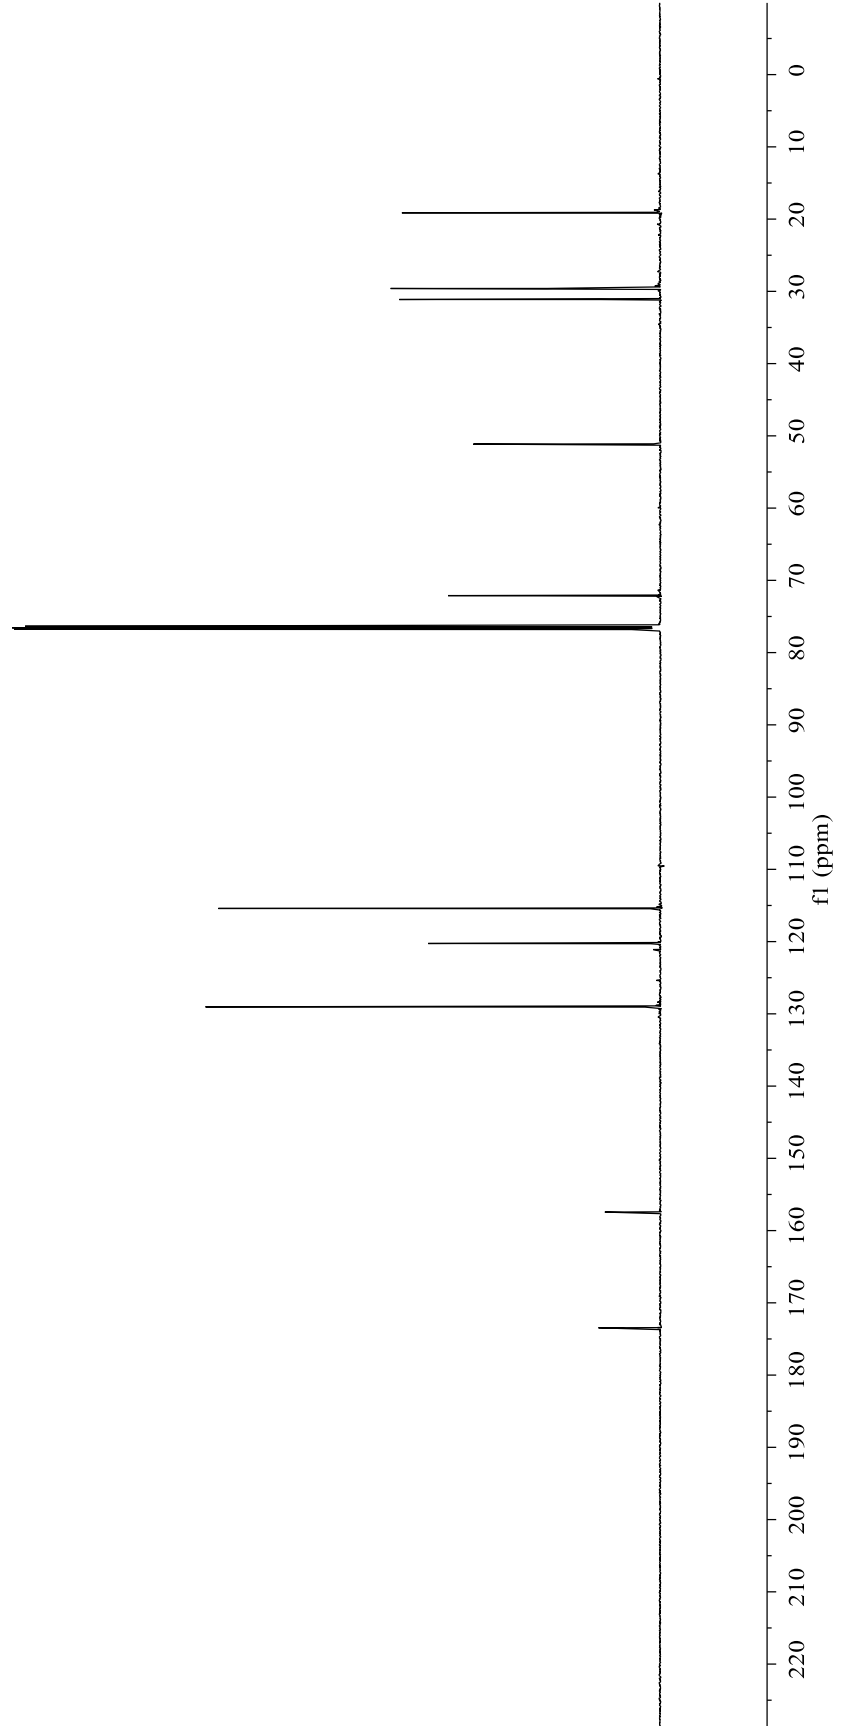



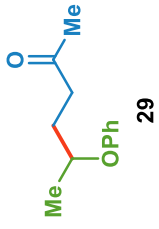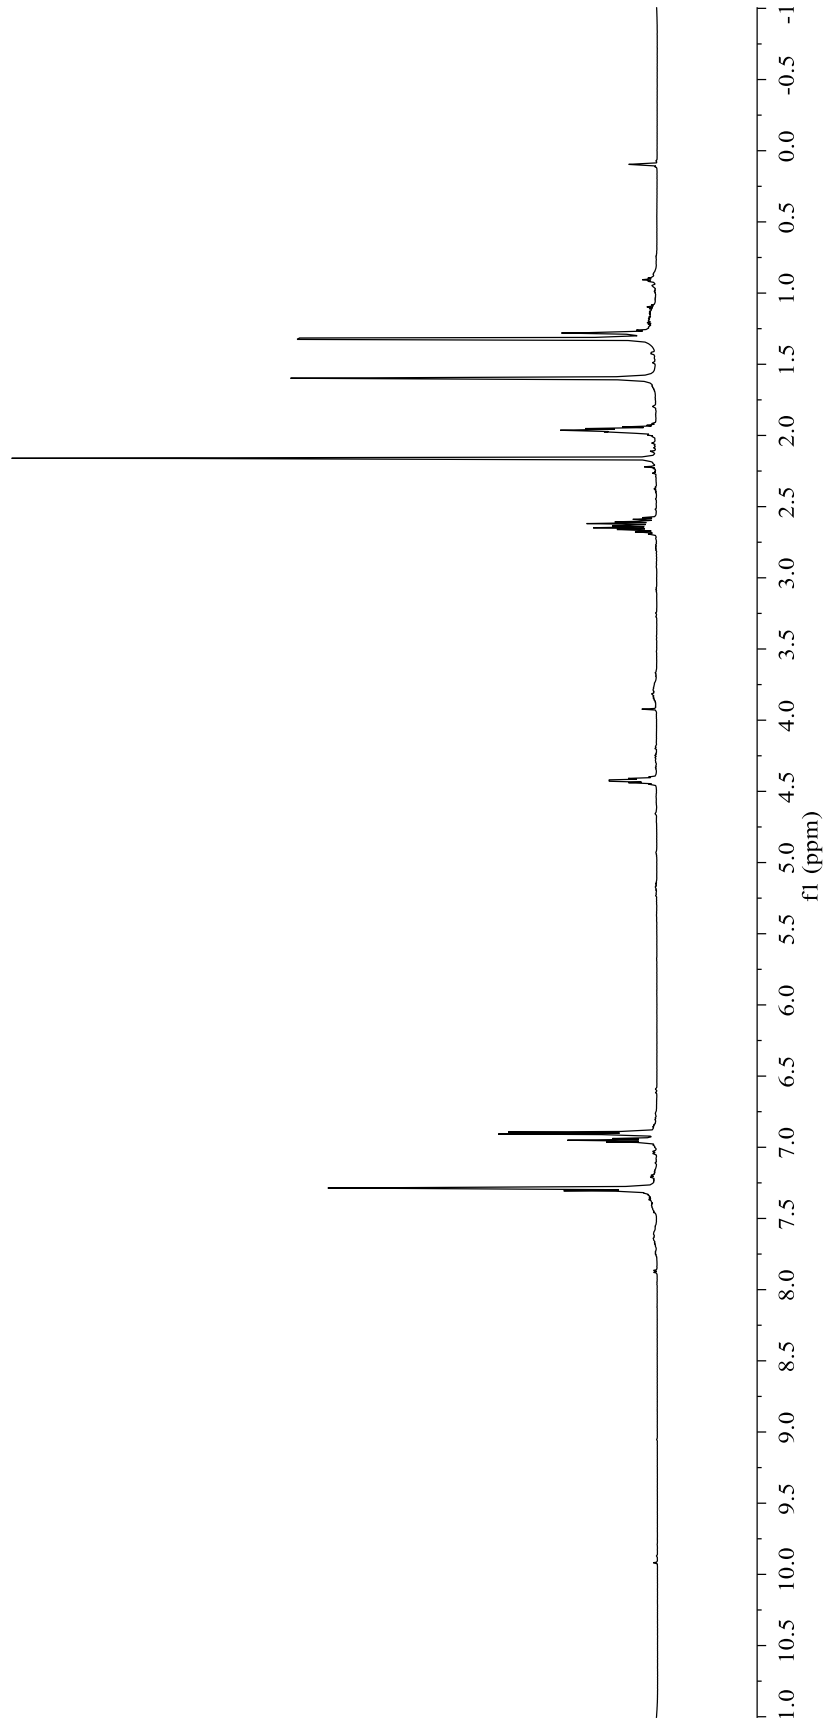

S110

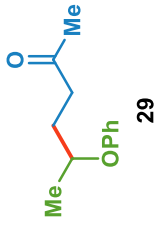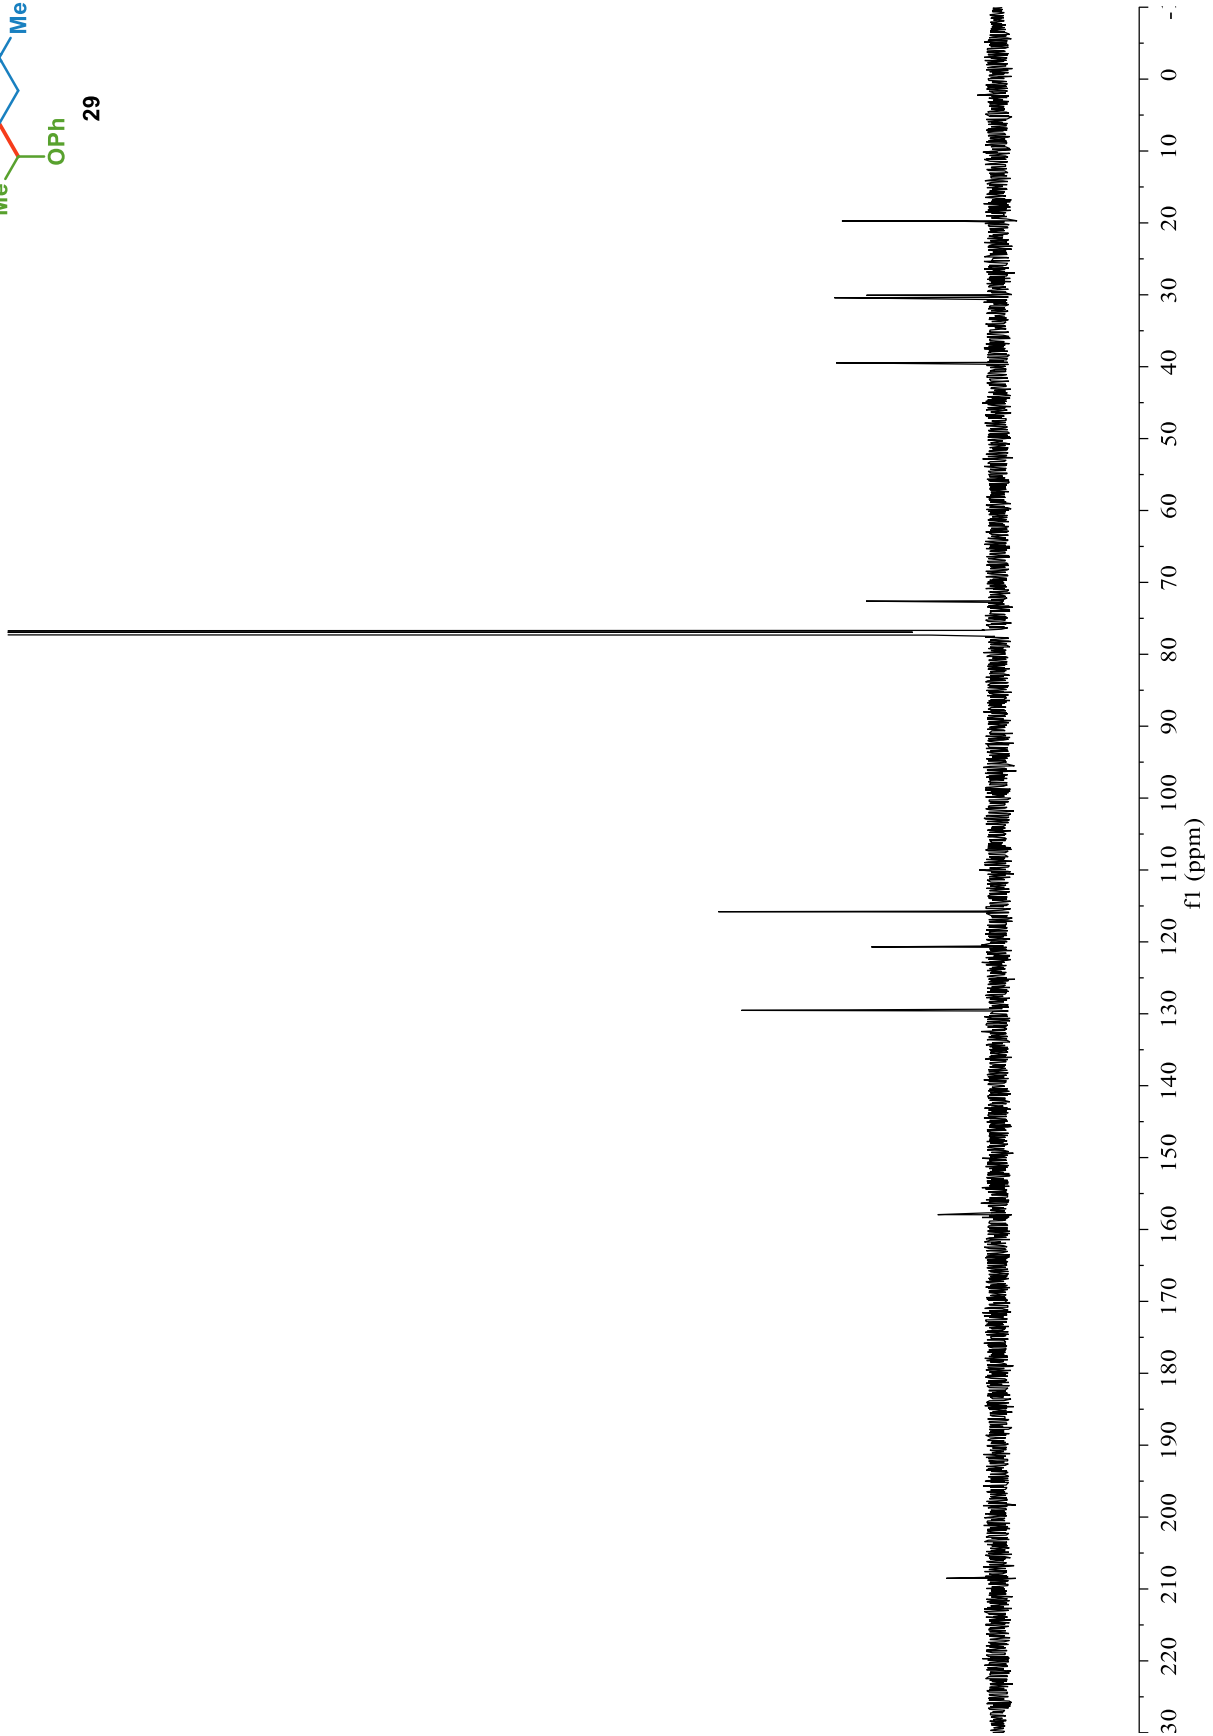

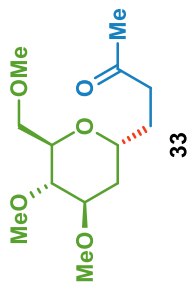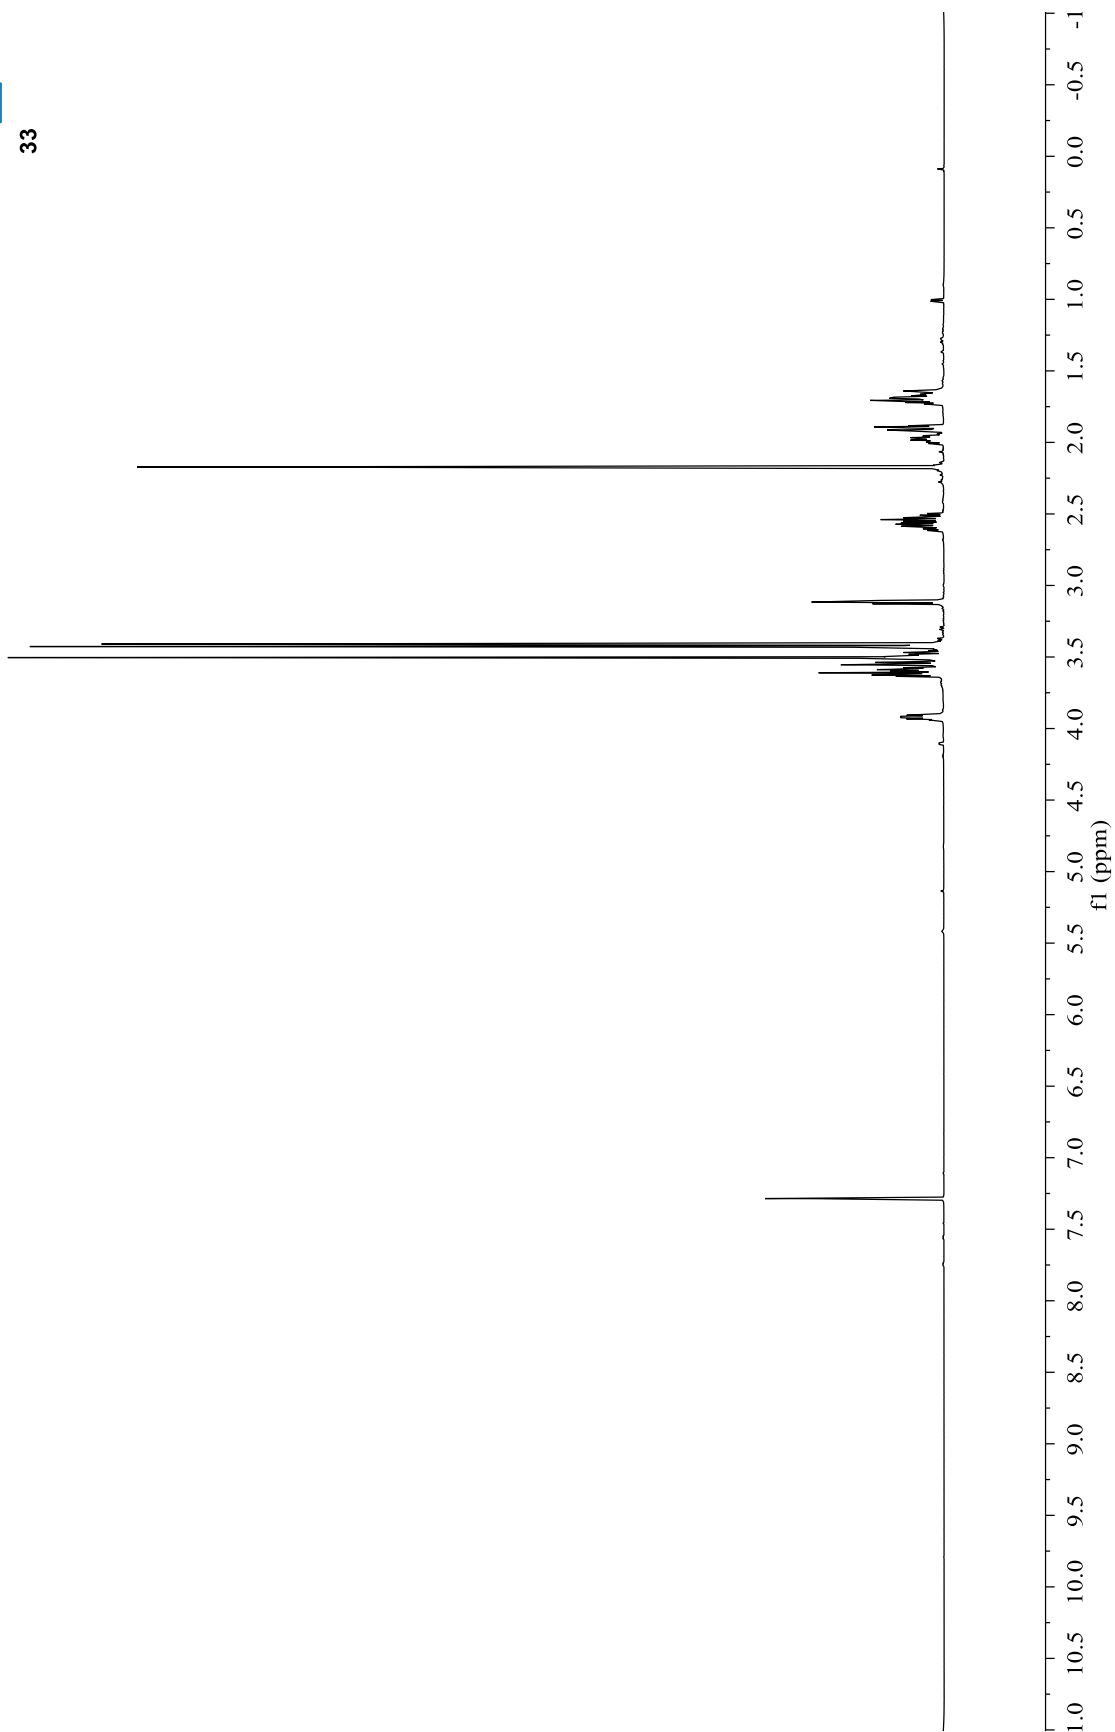

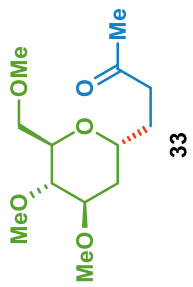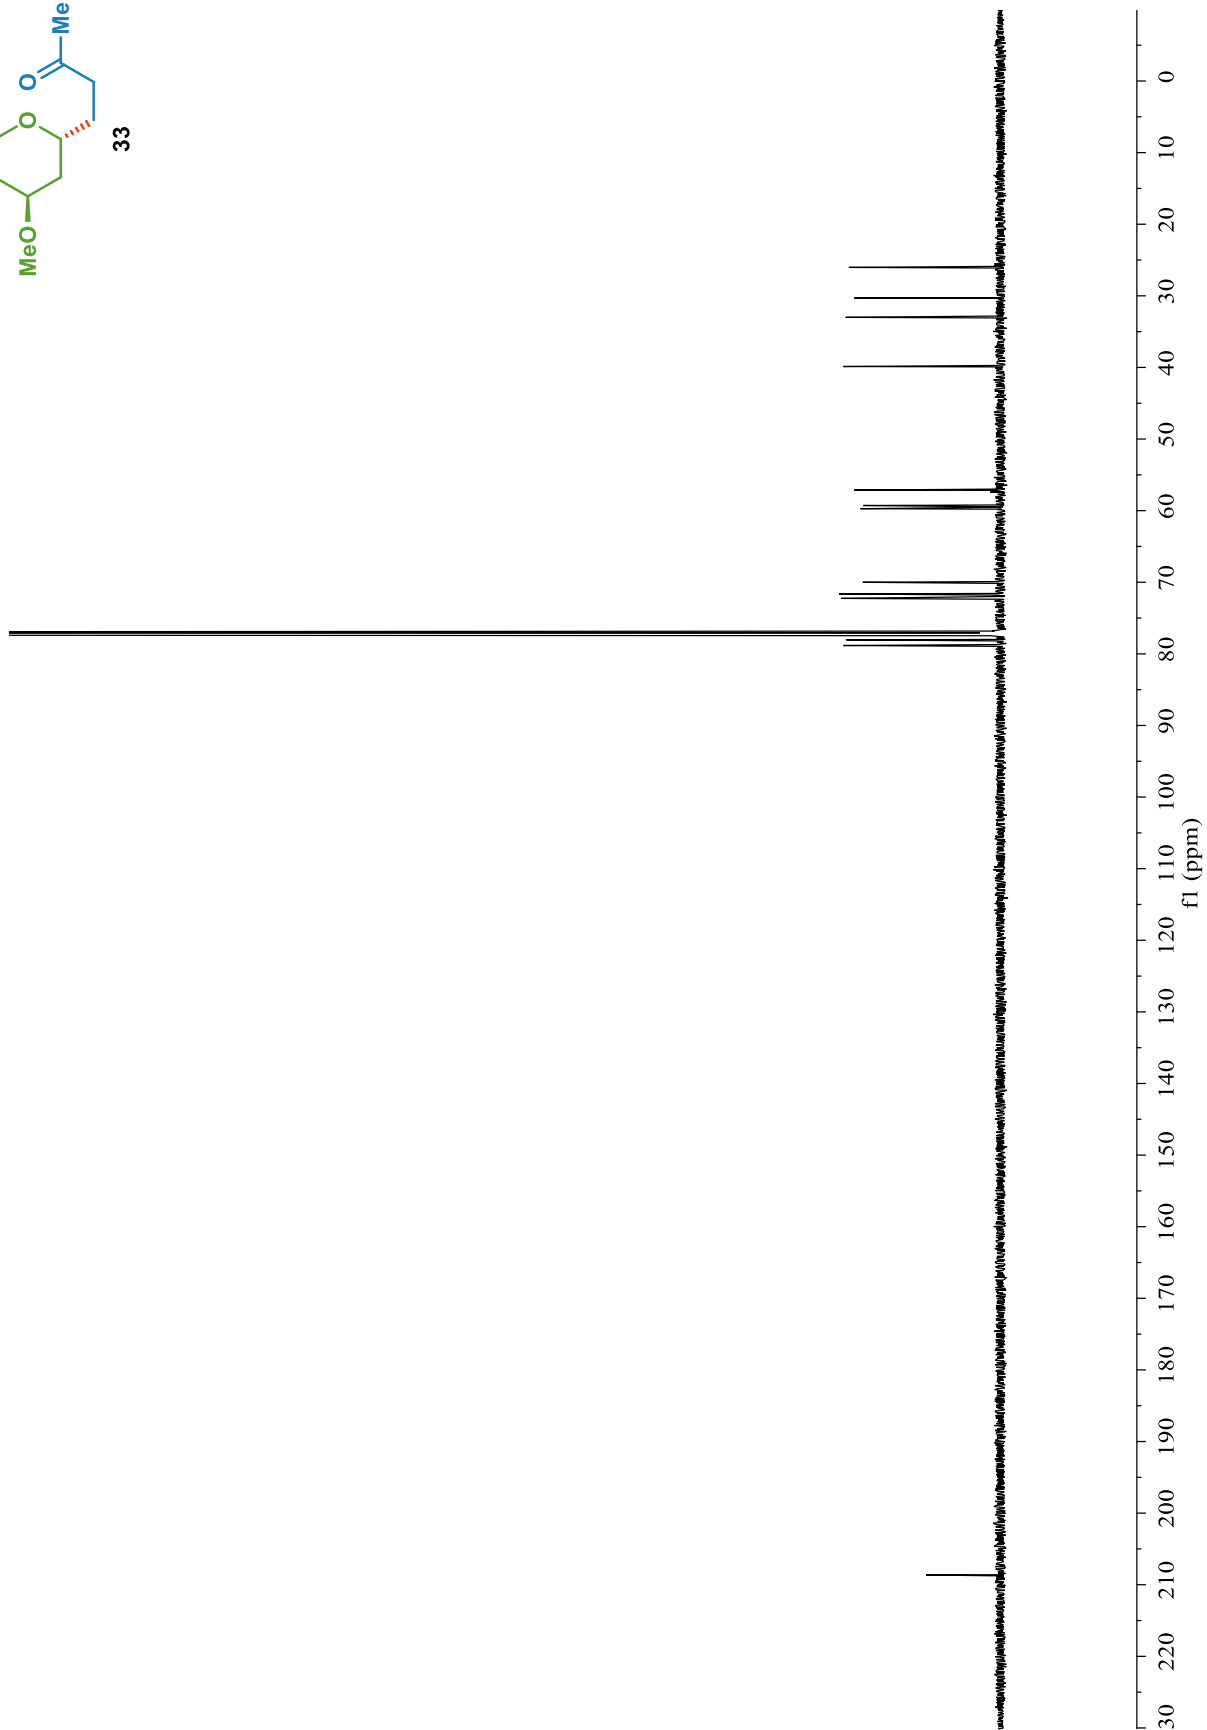

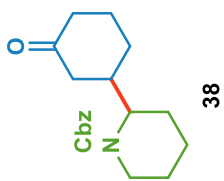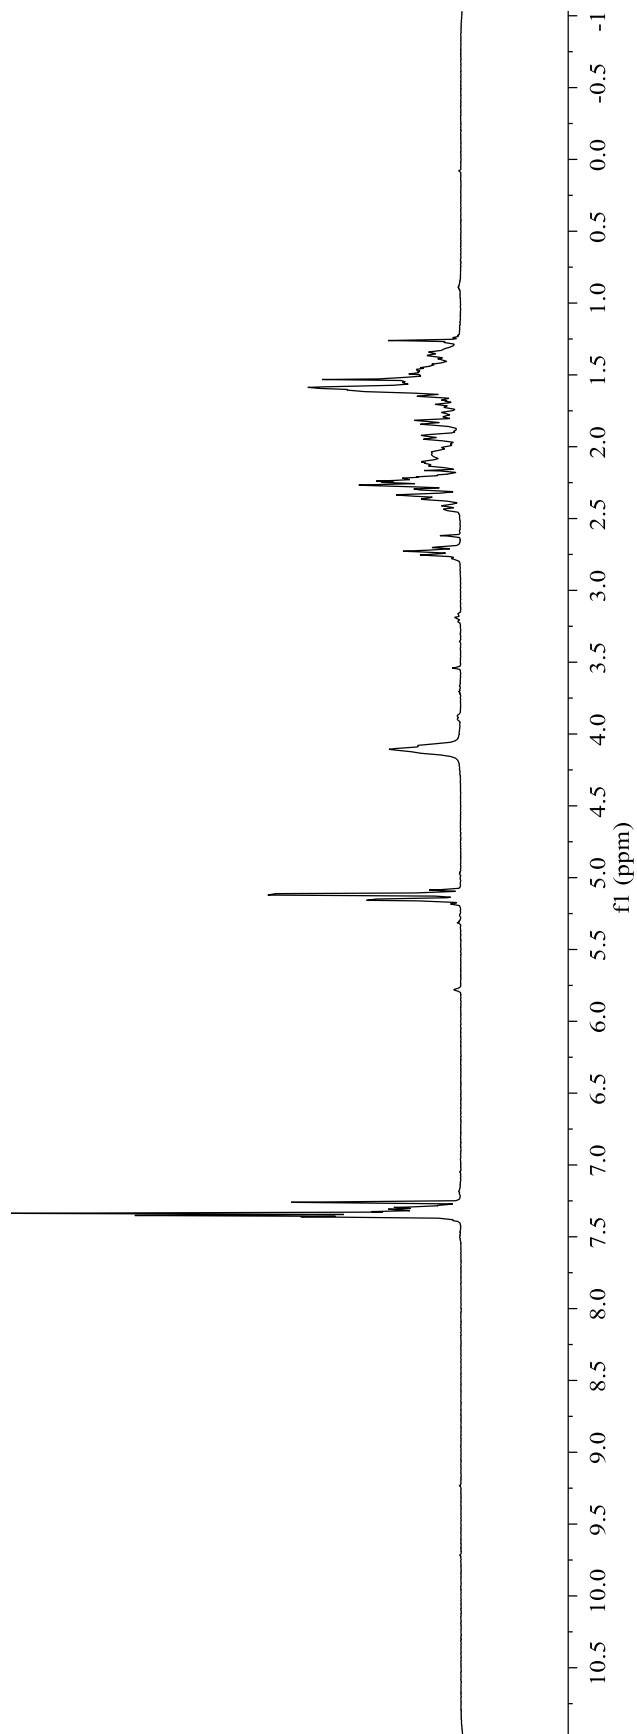

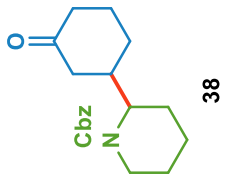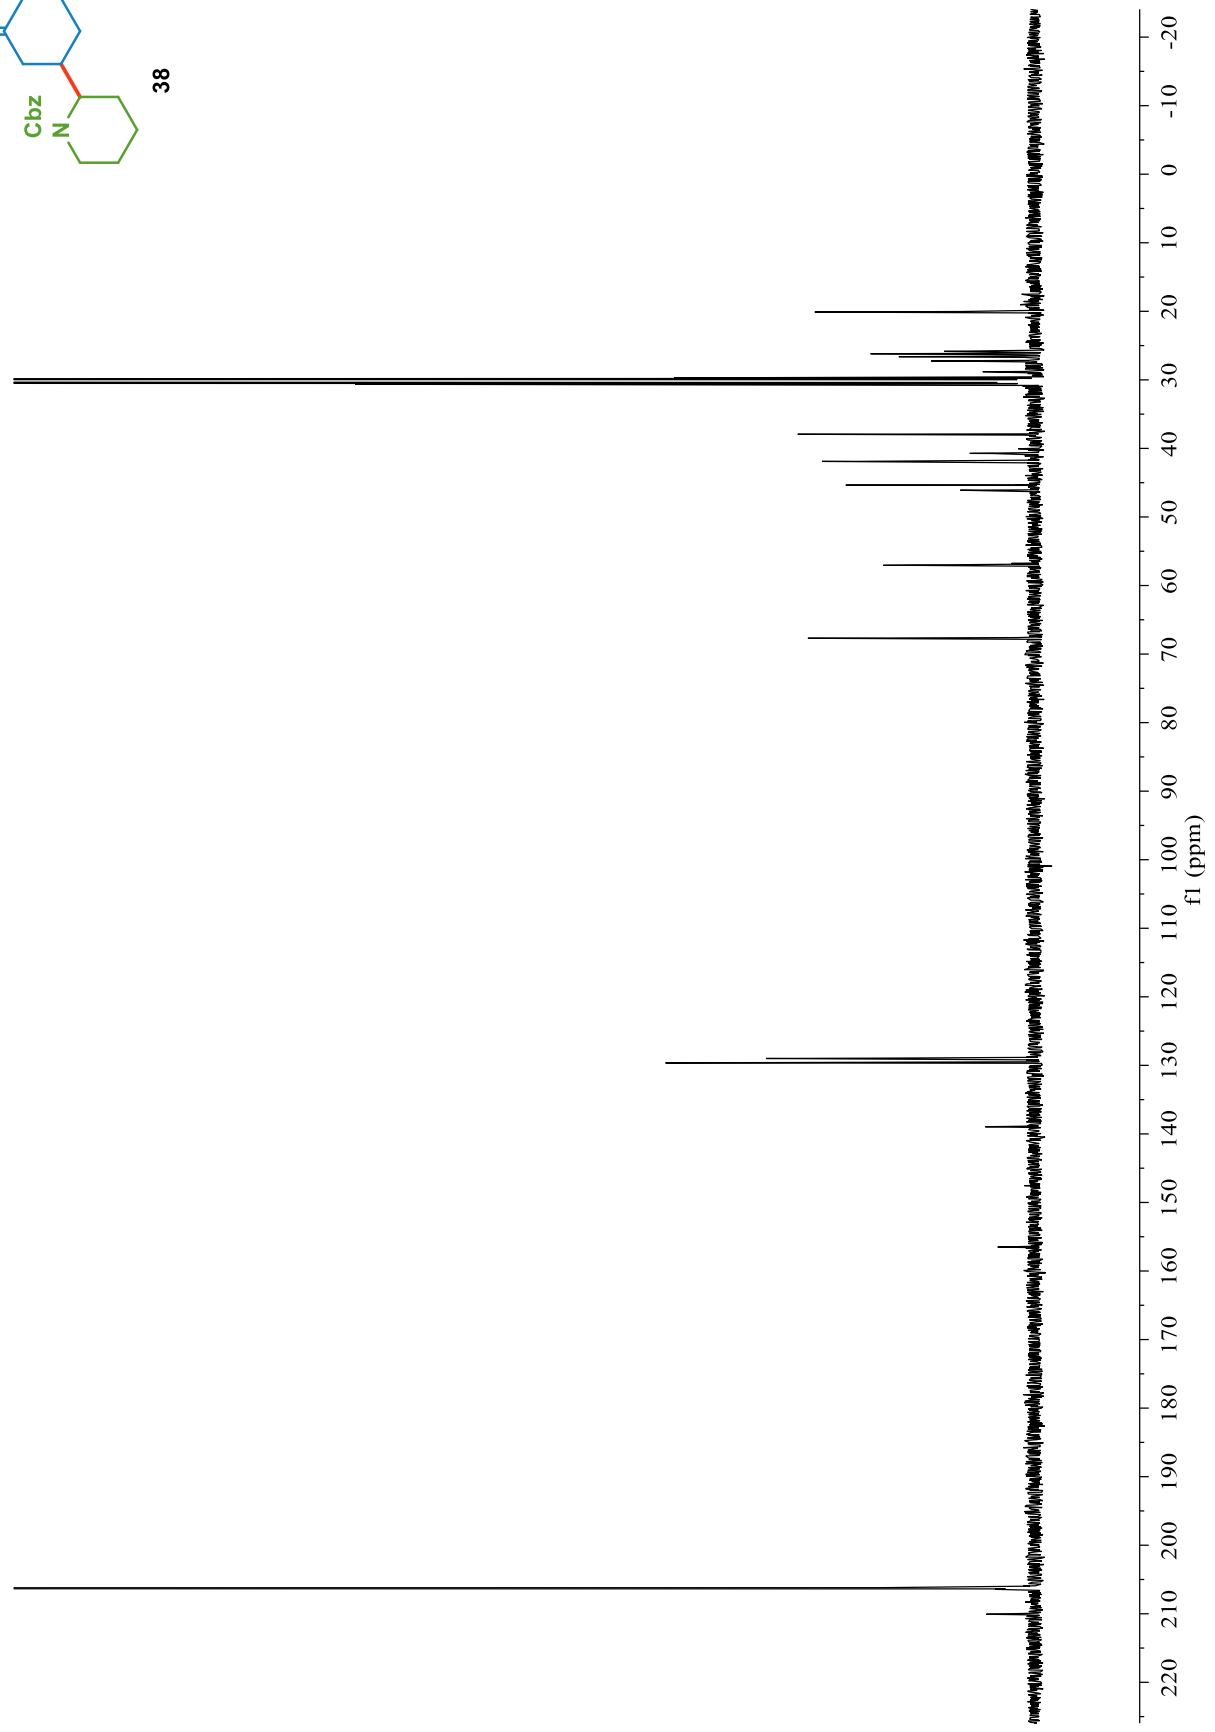

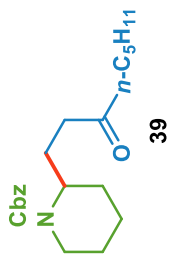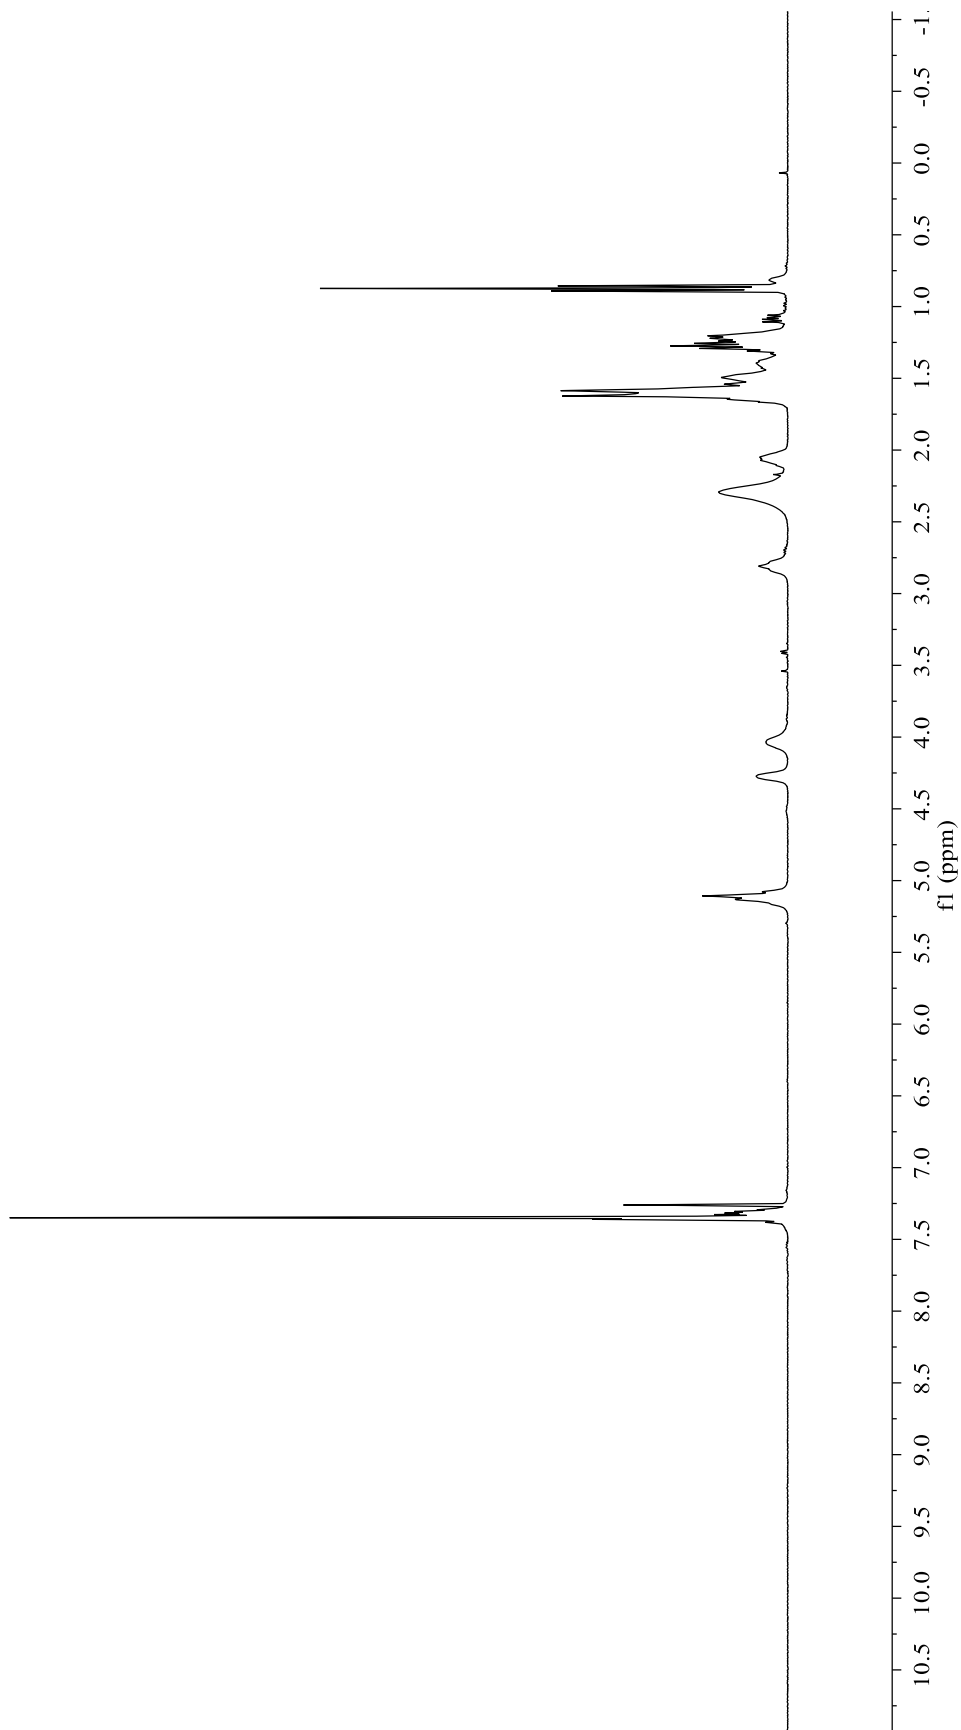

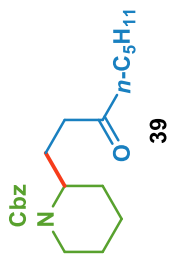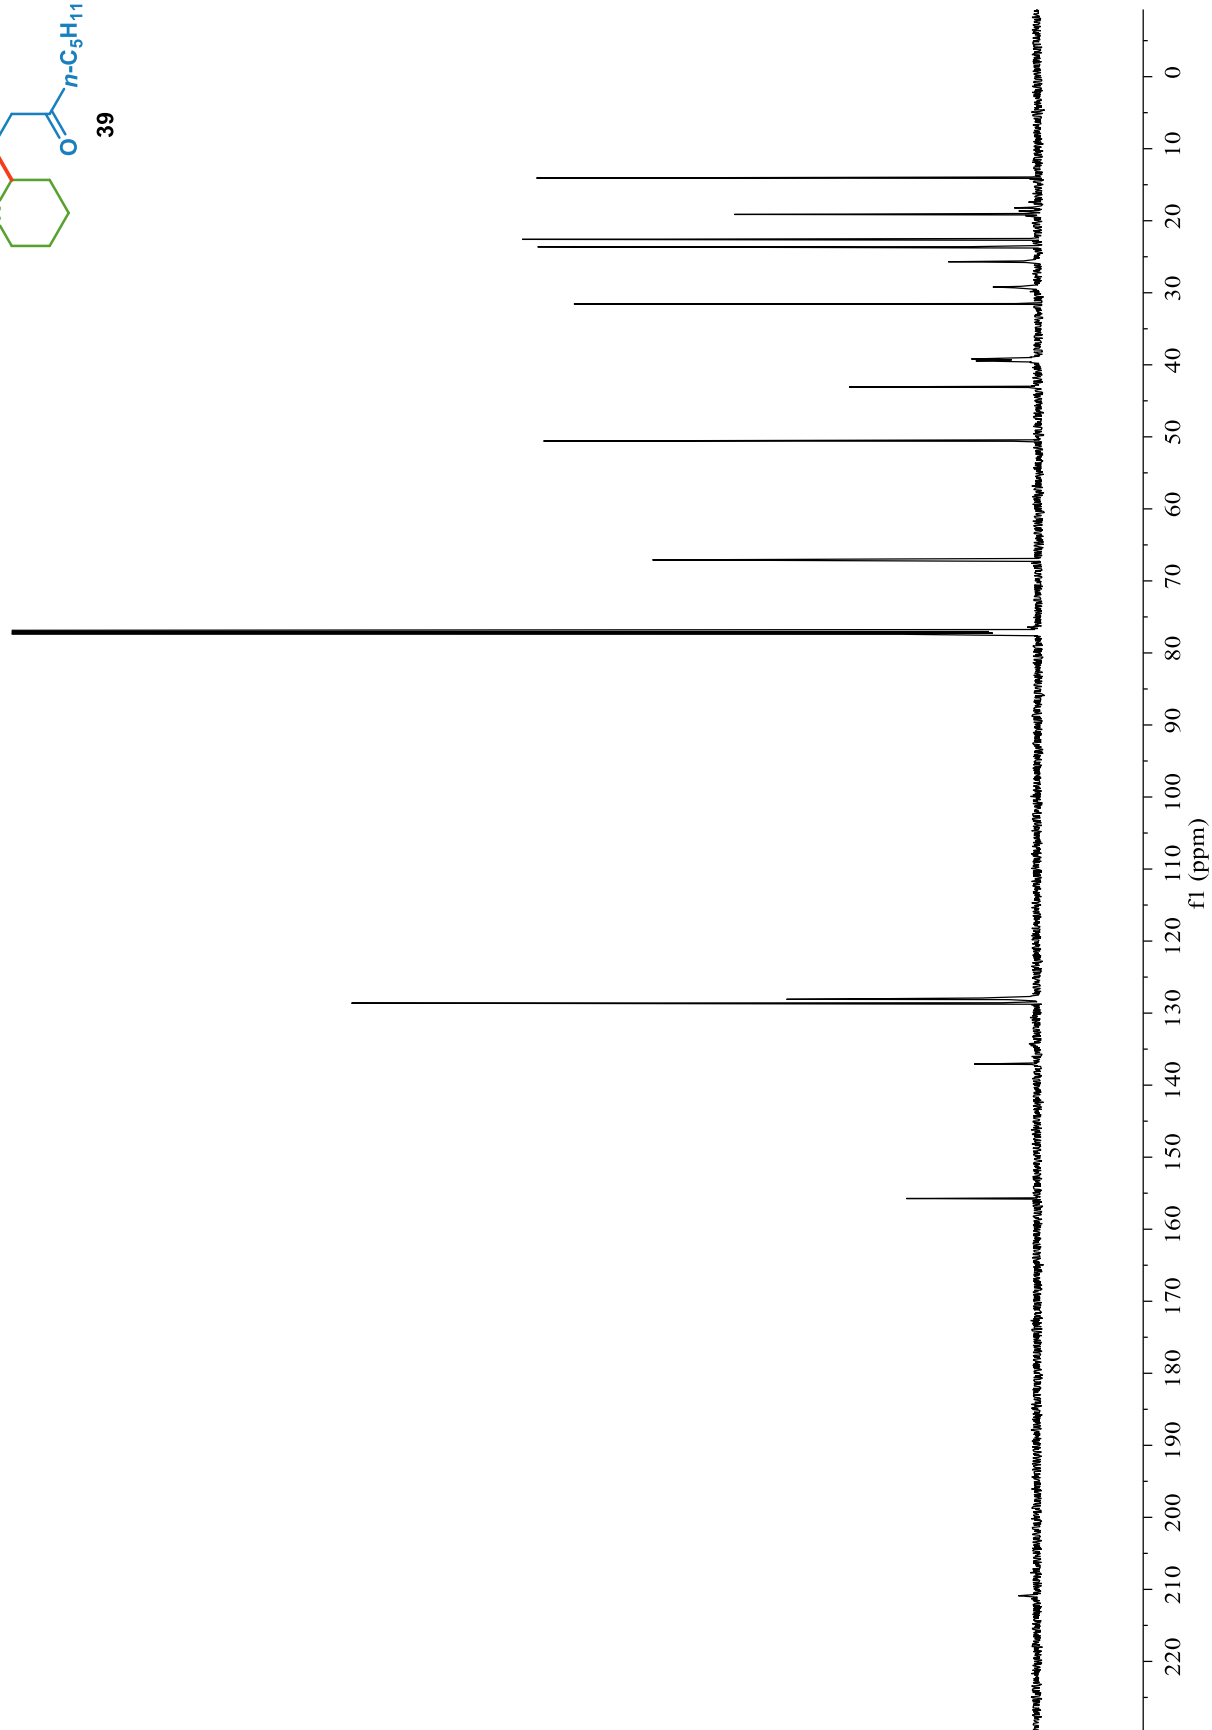



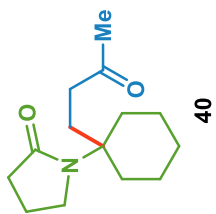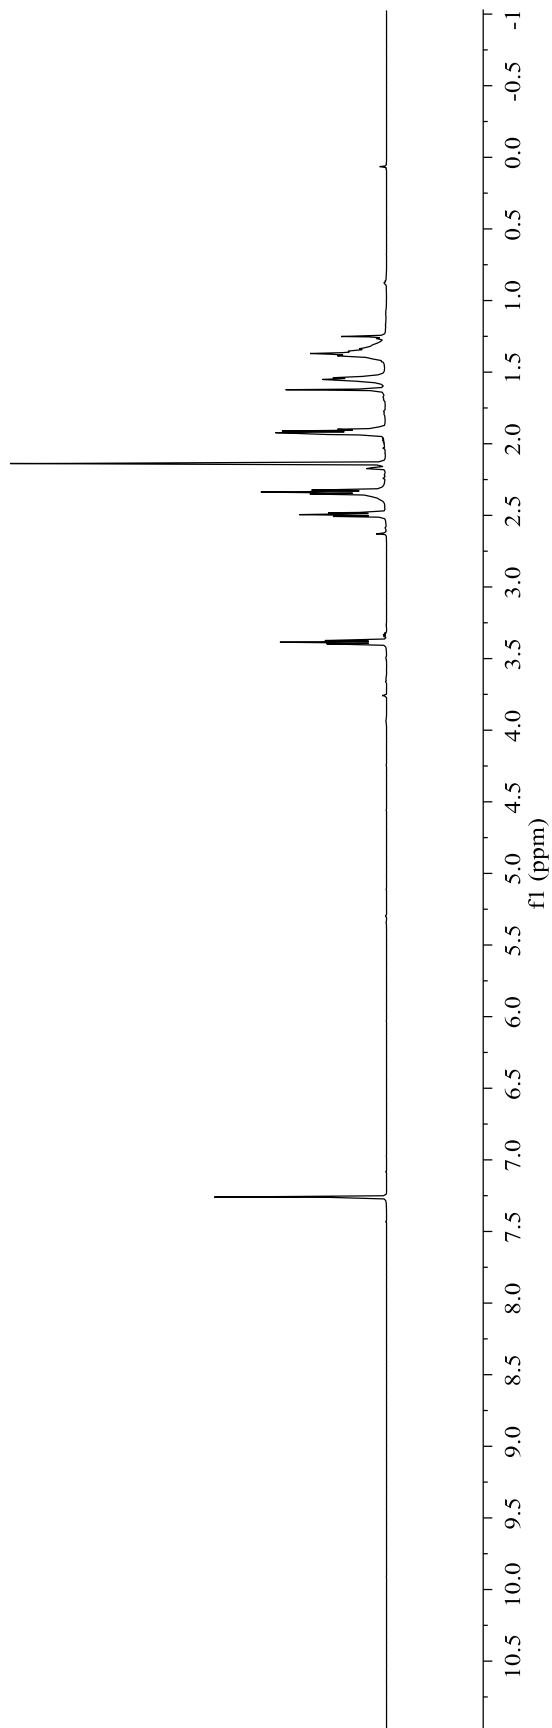

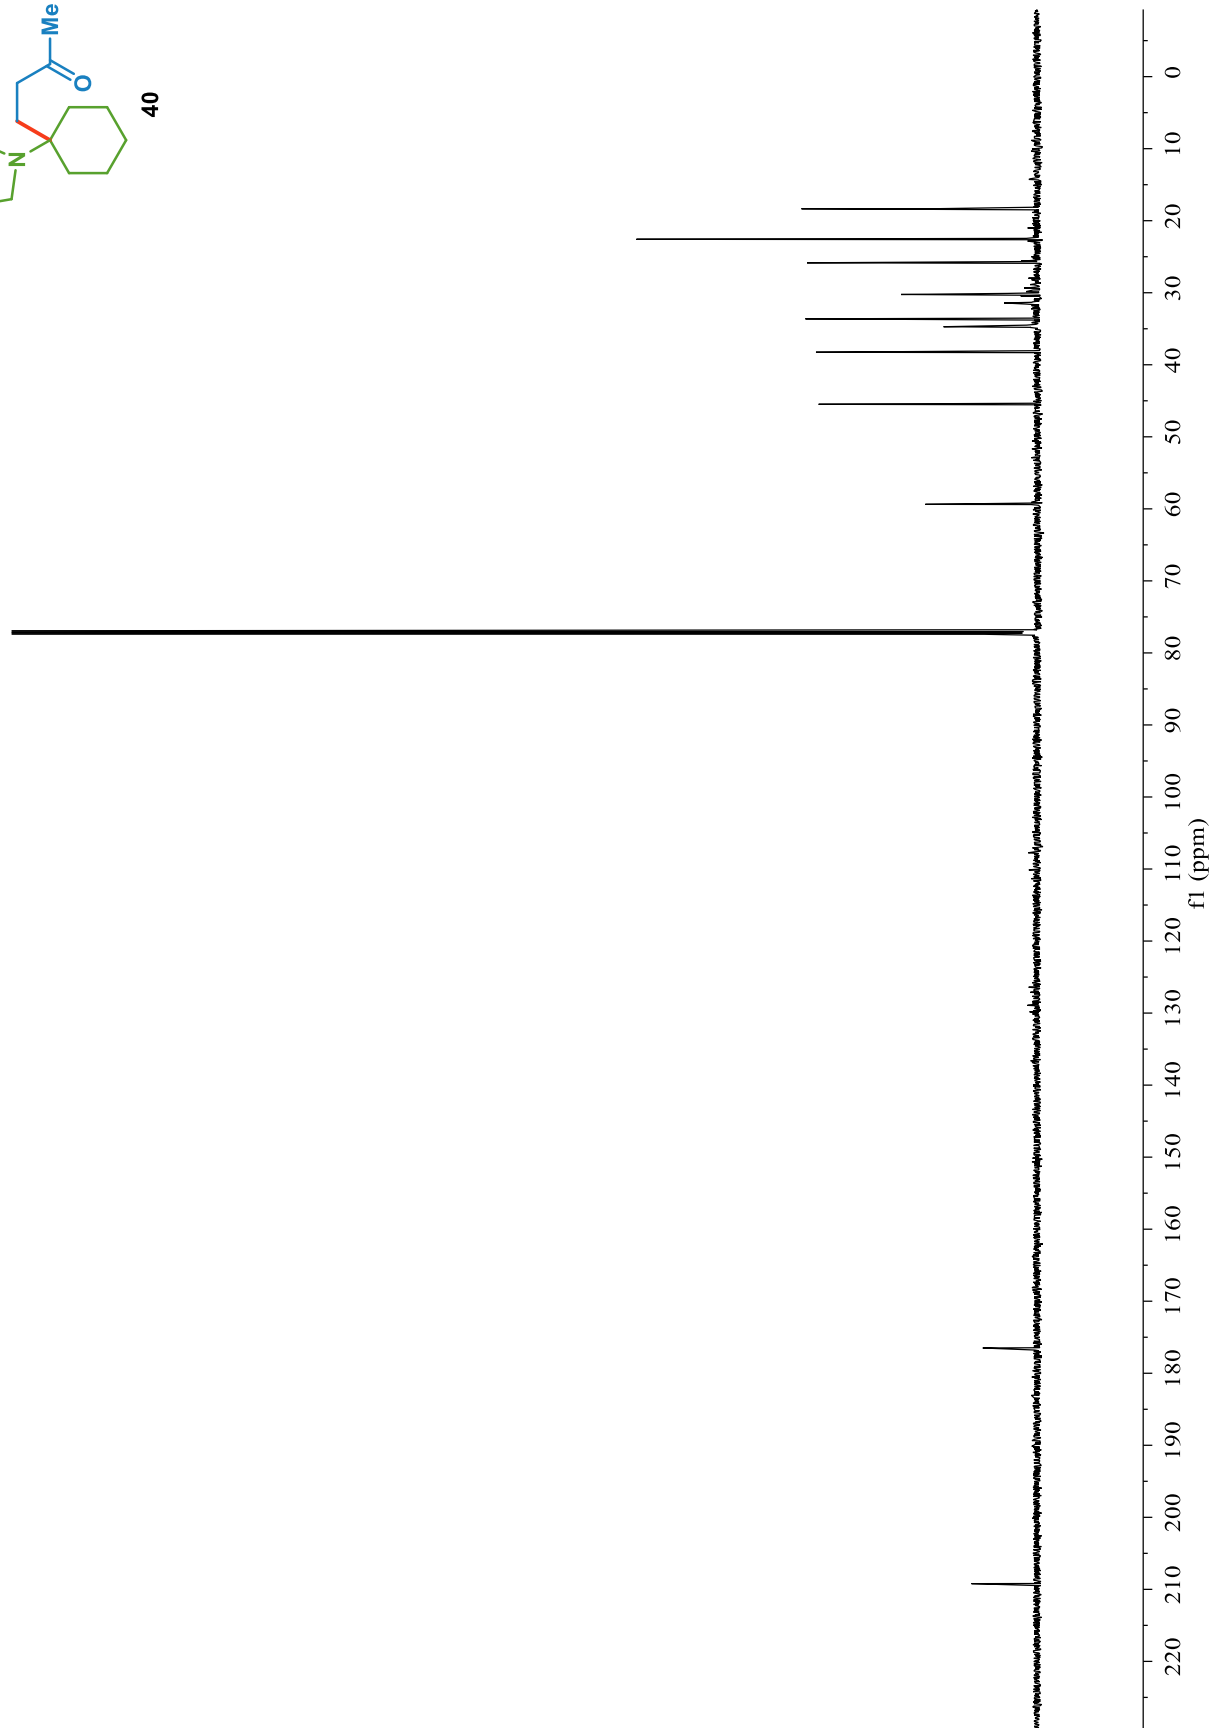

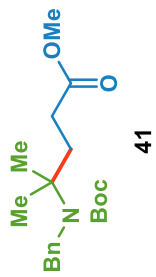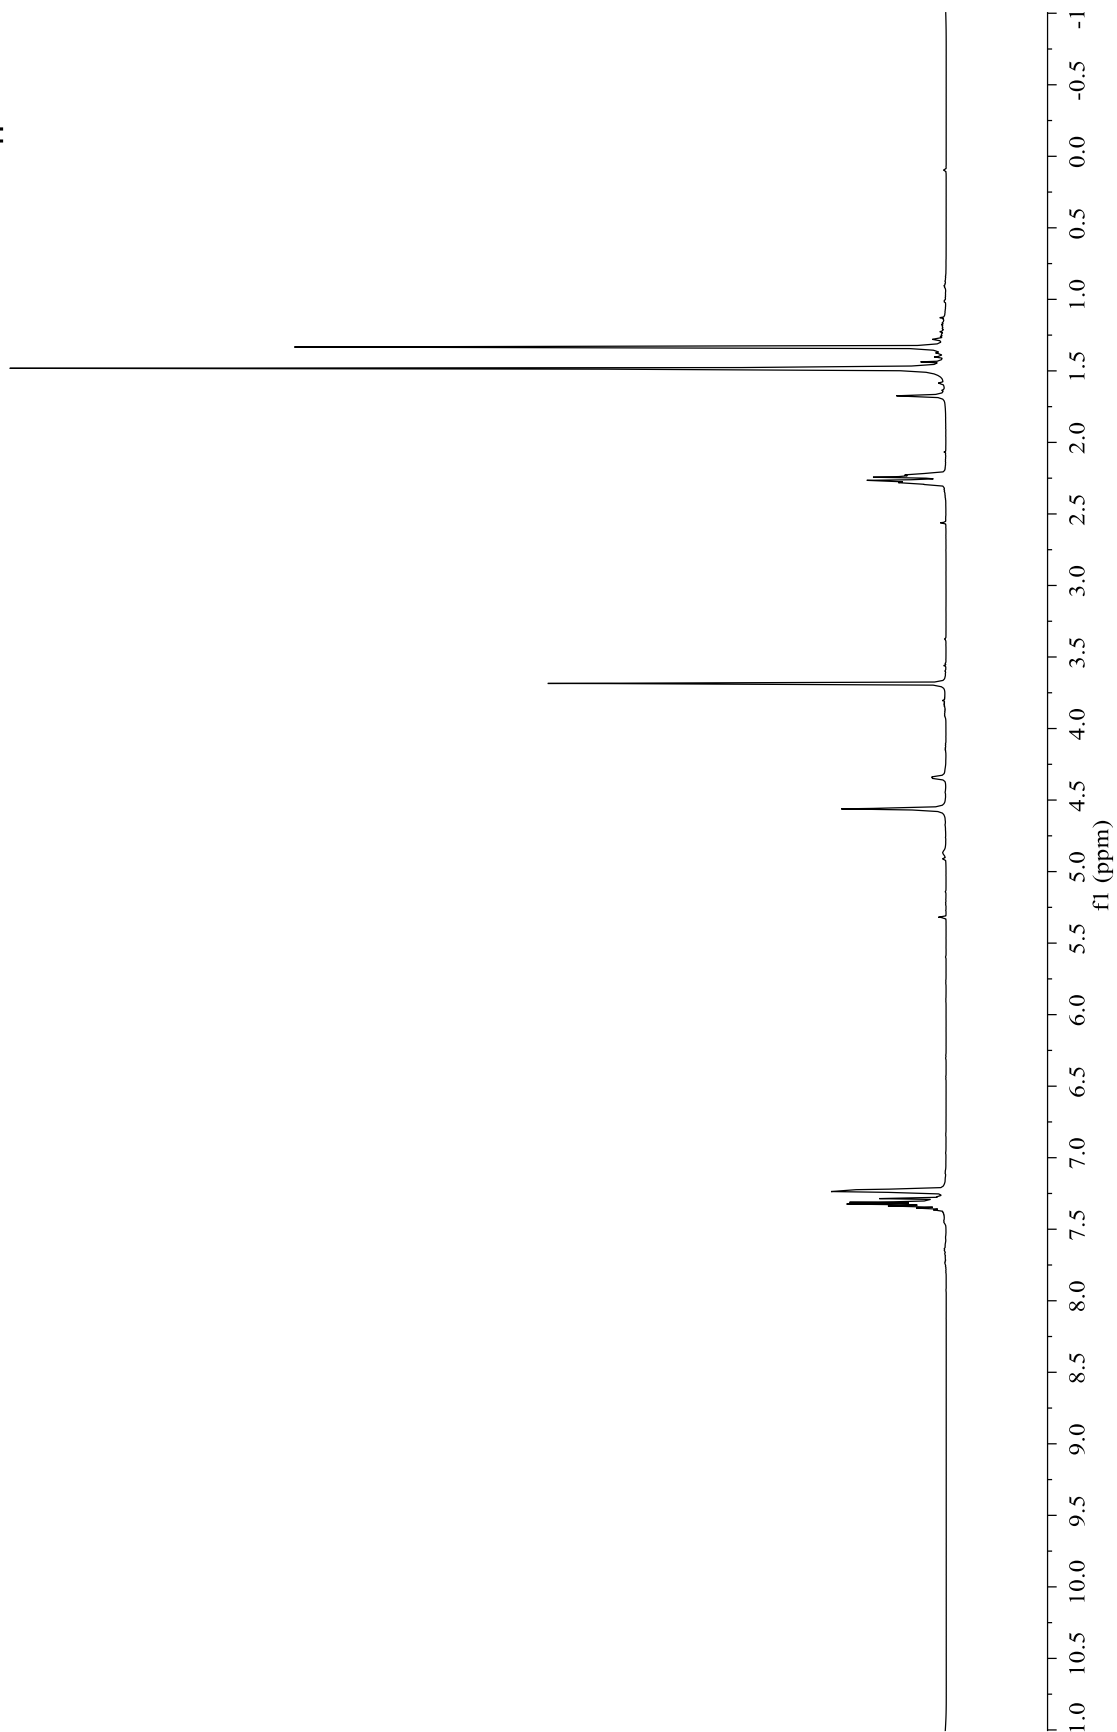

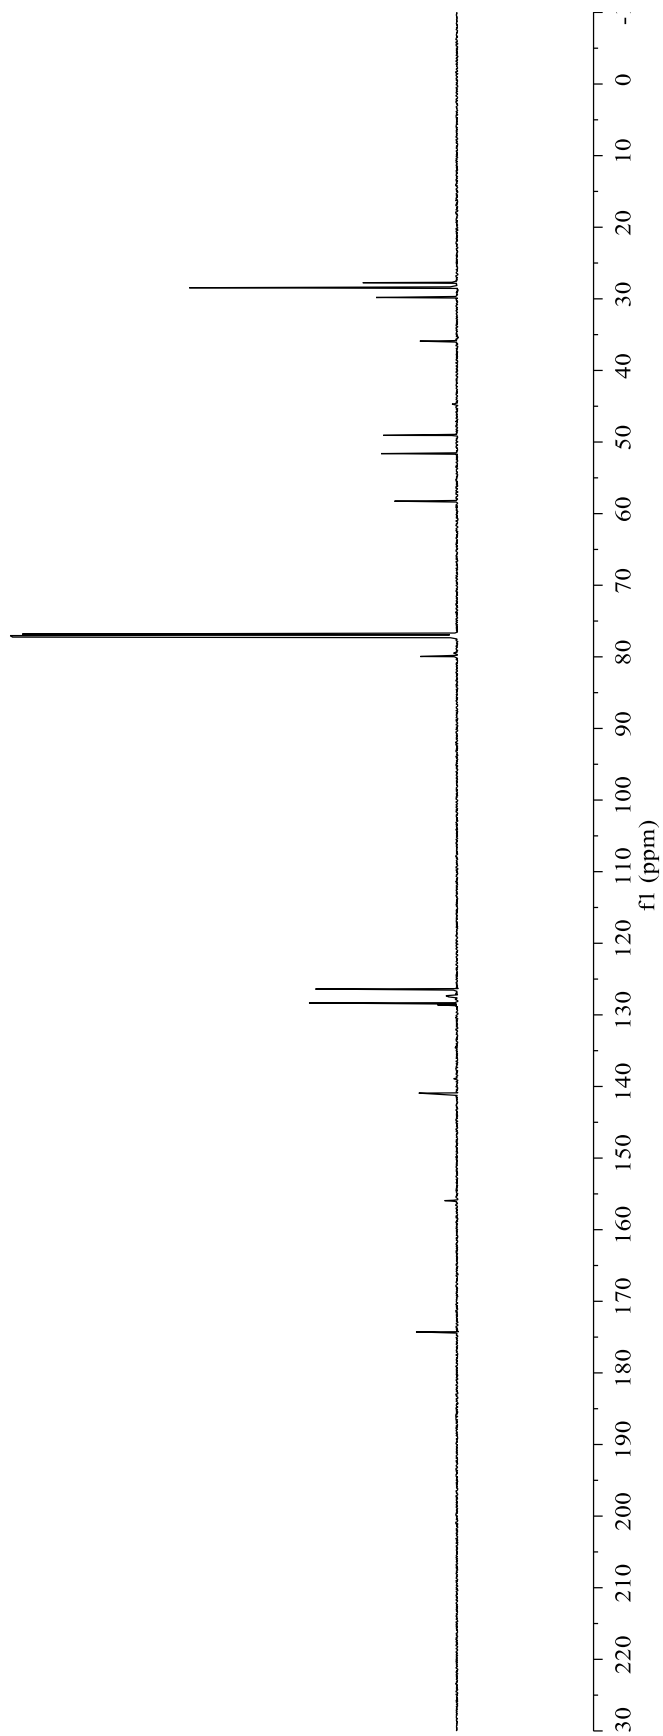

S121

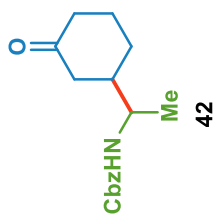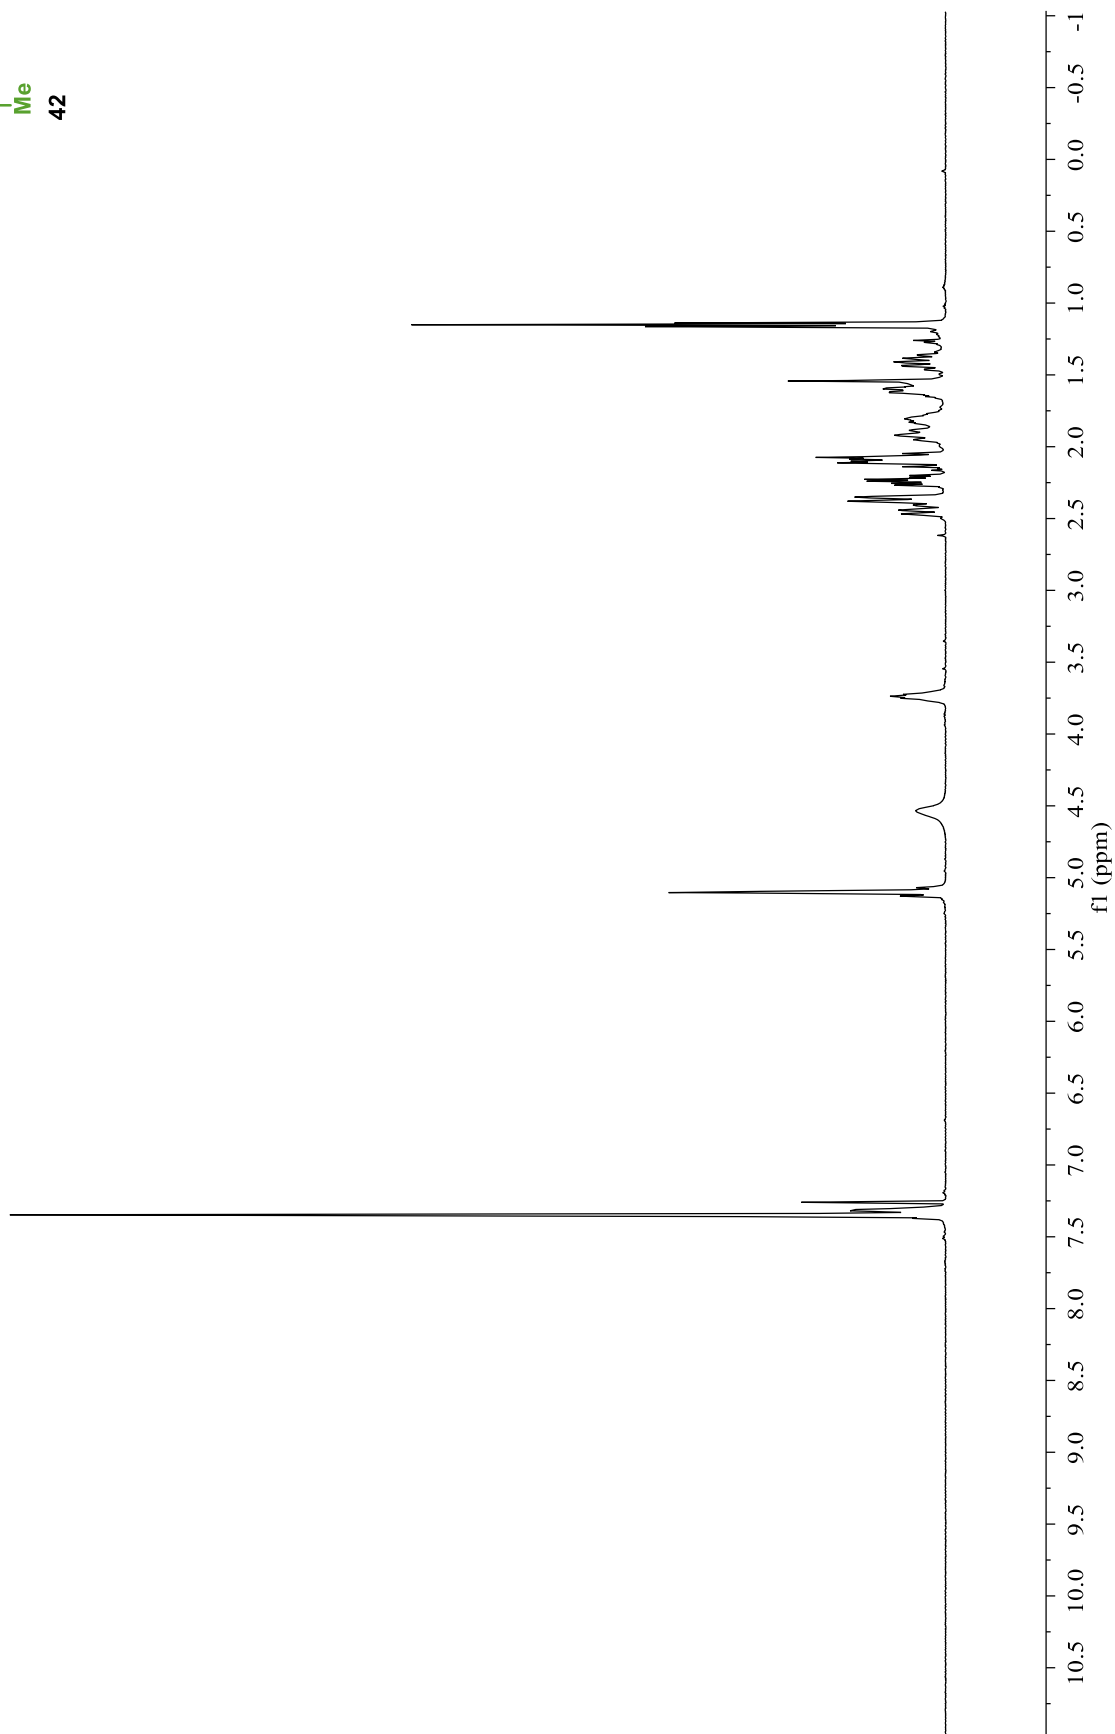

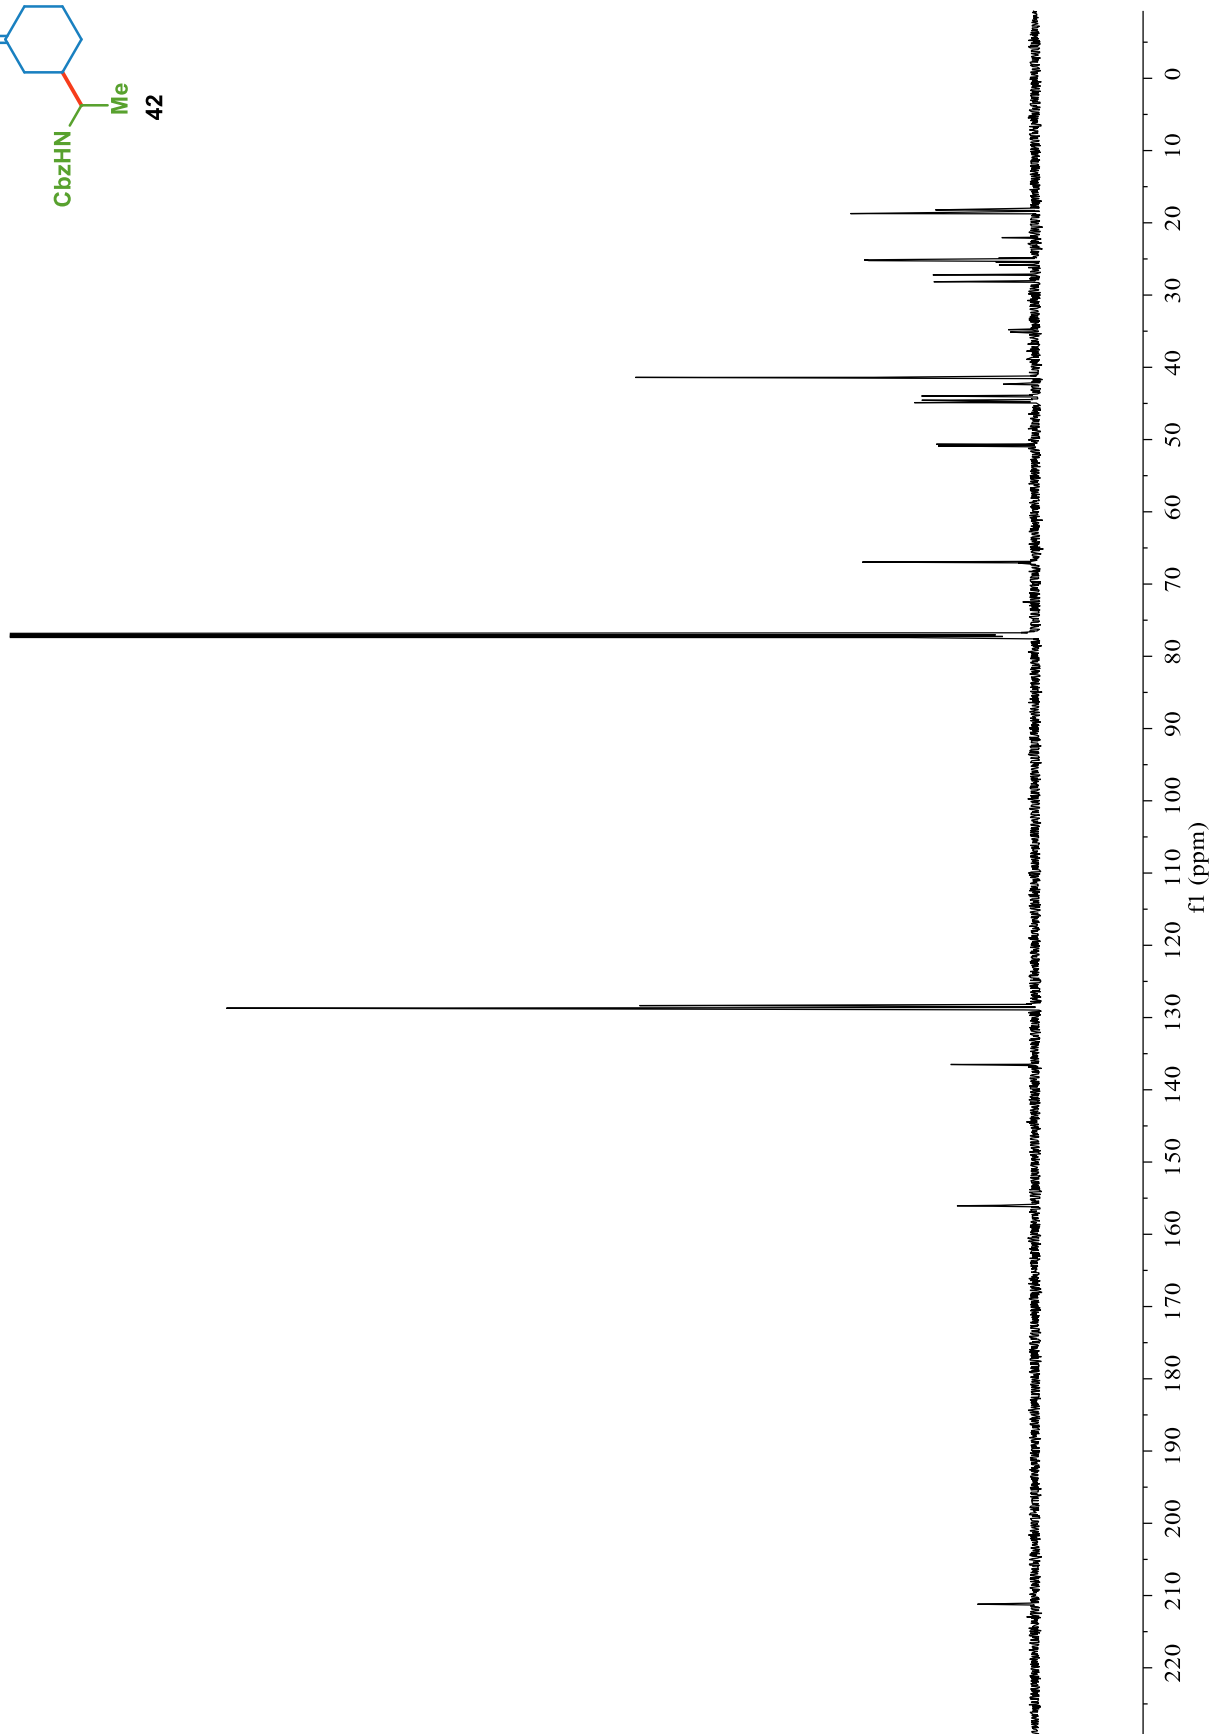

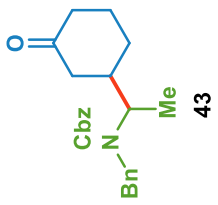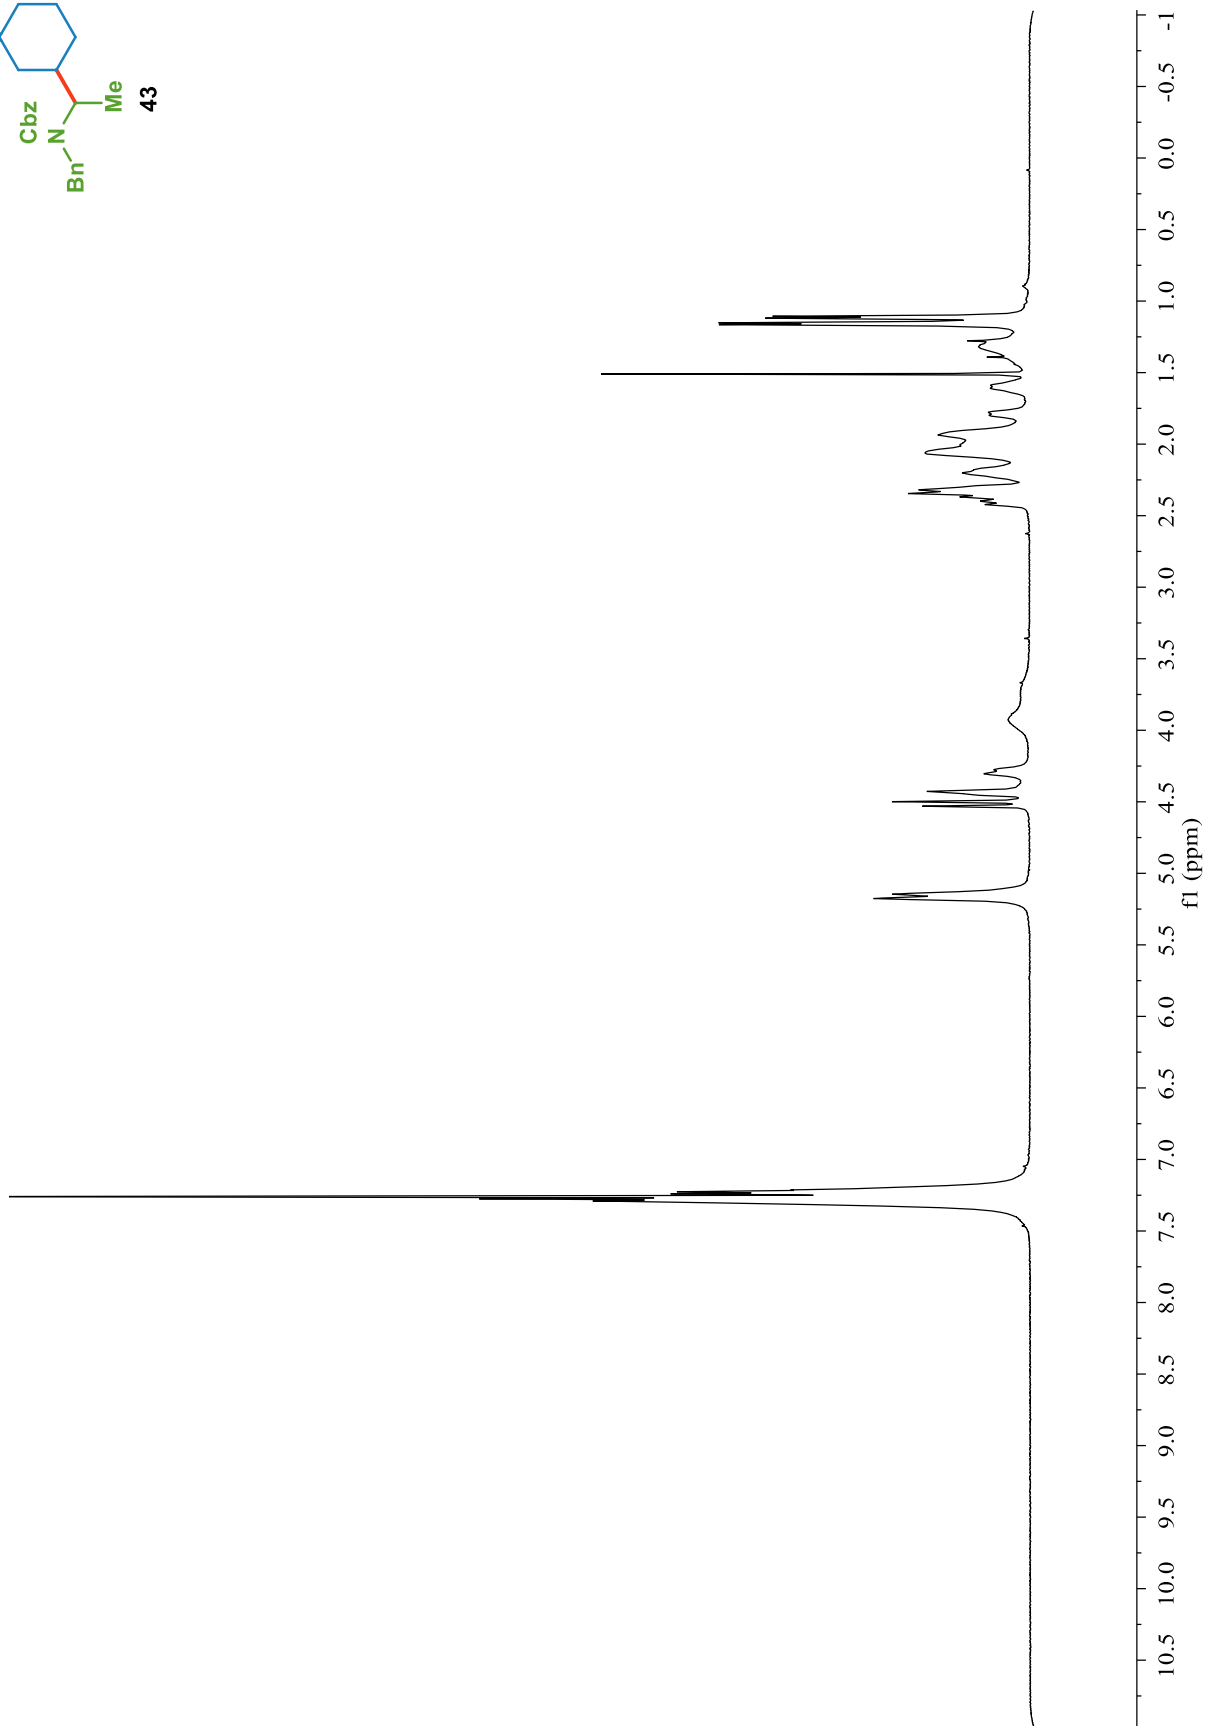

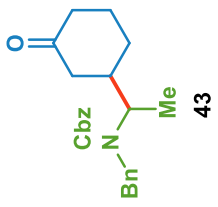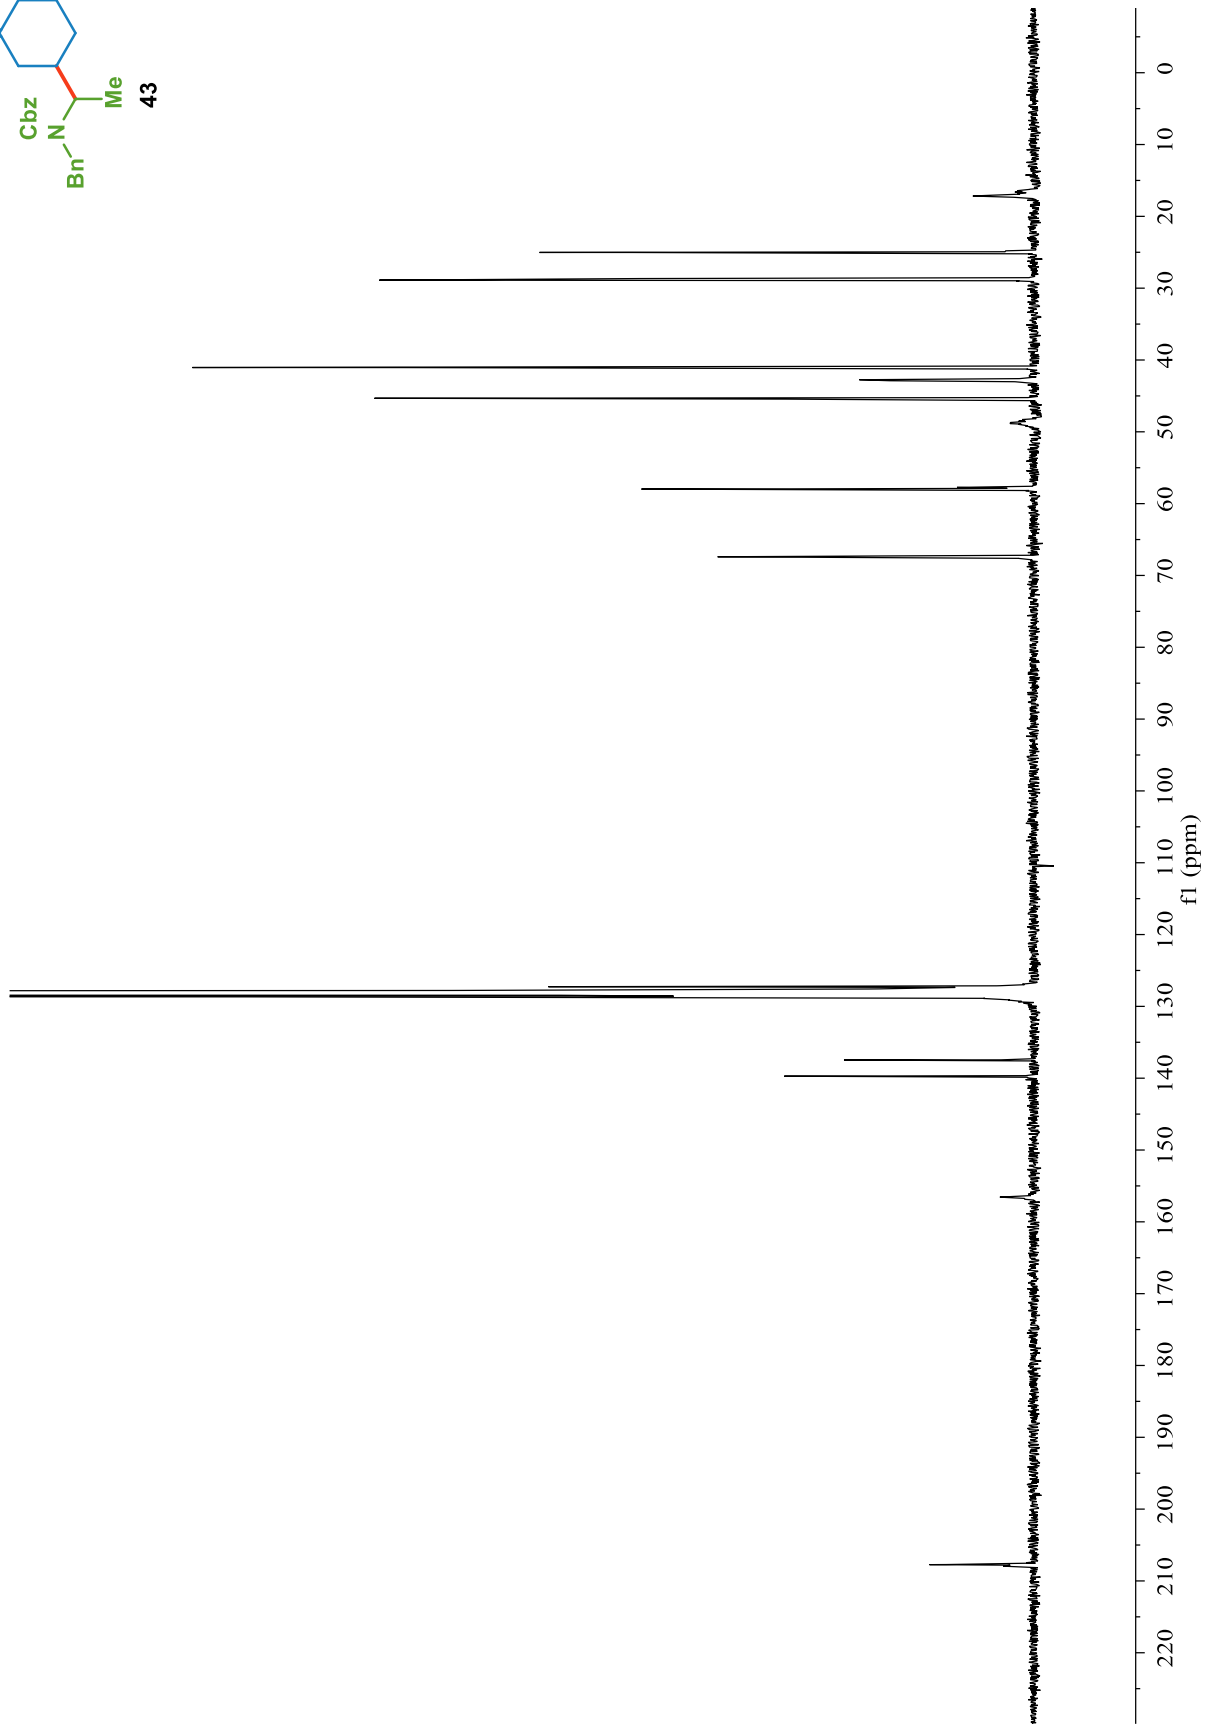



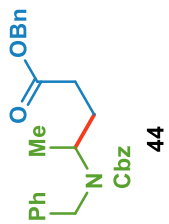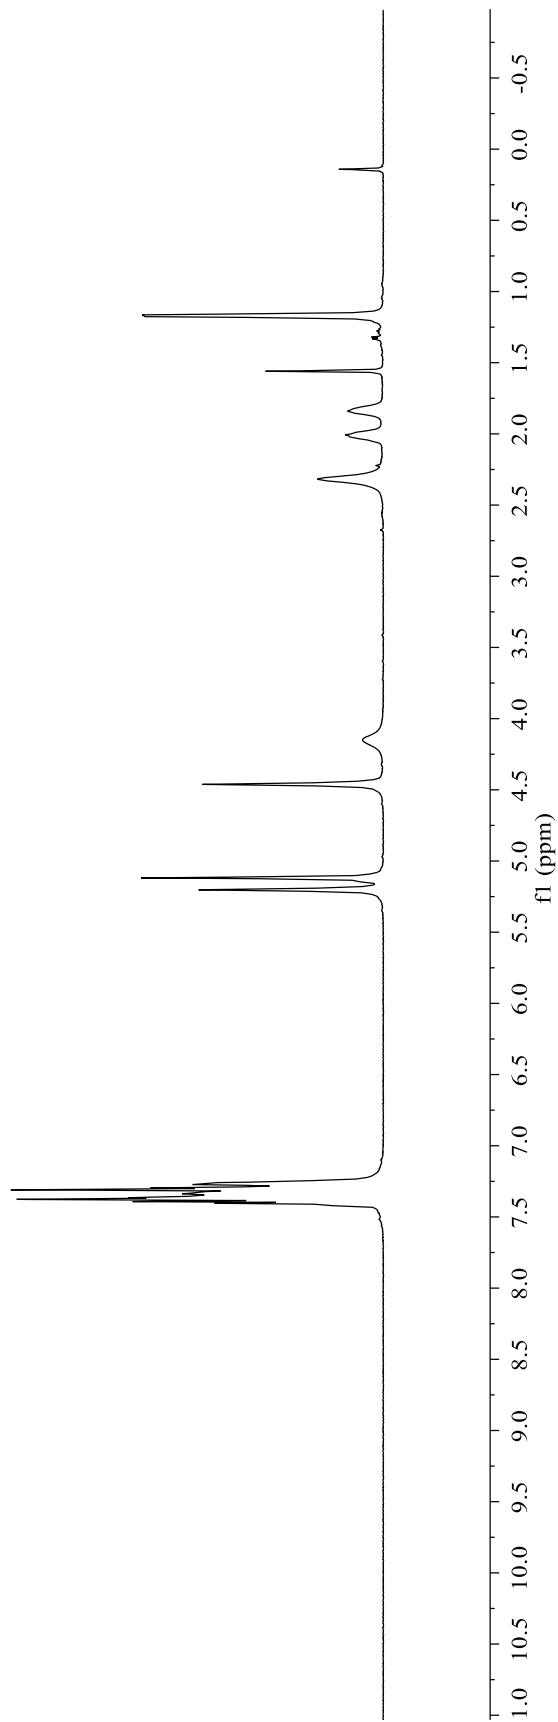

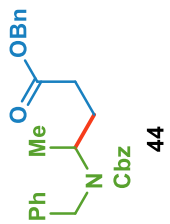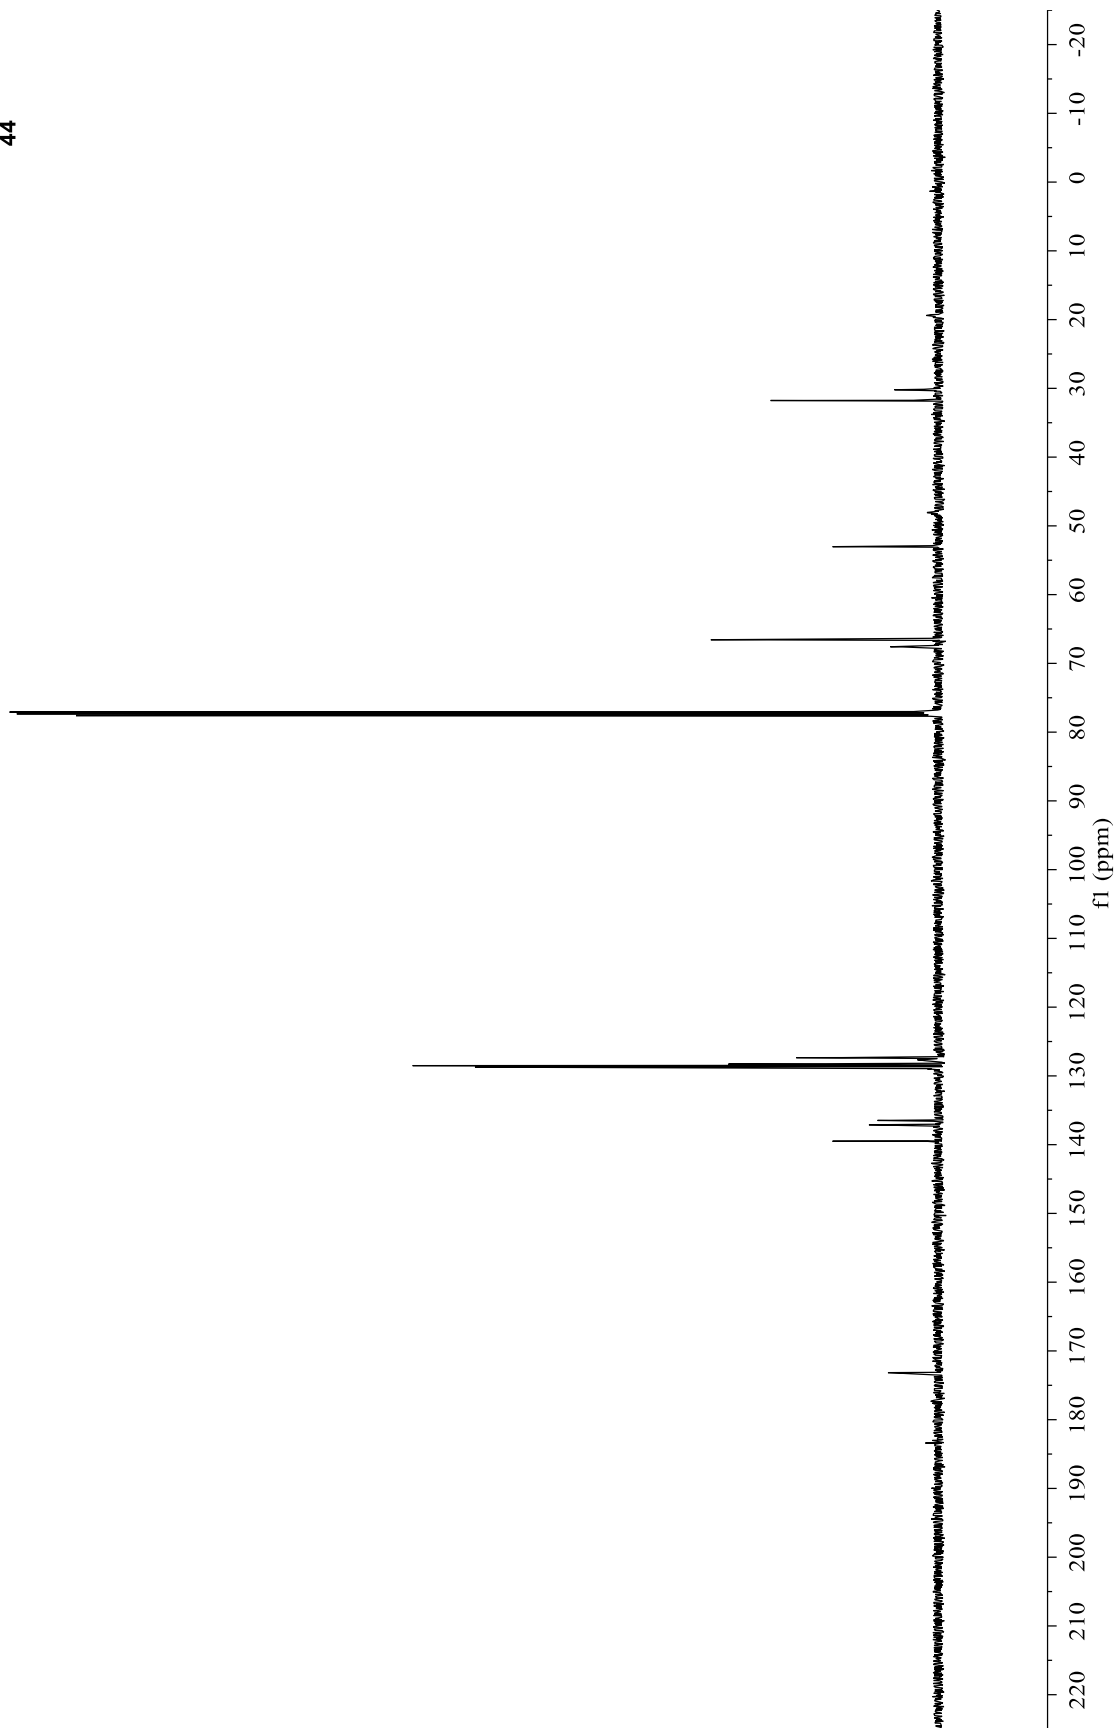

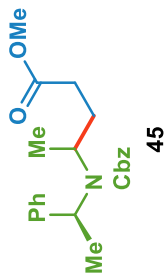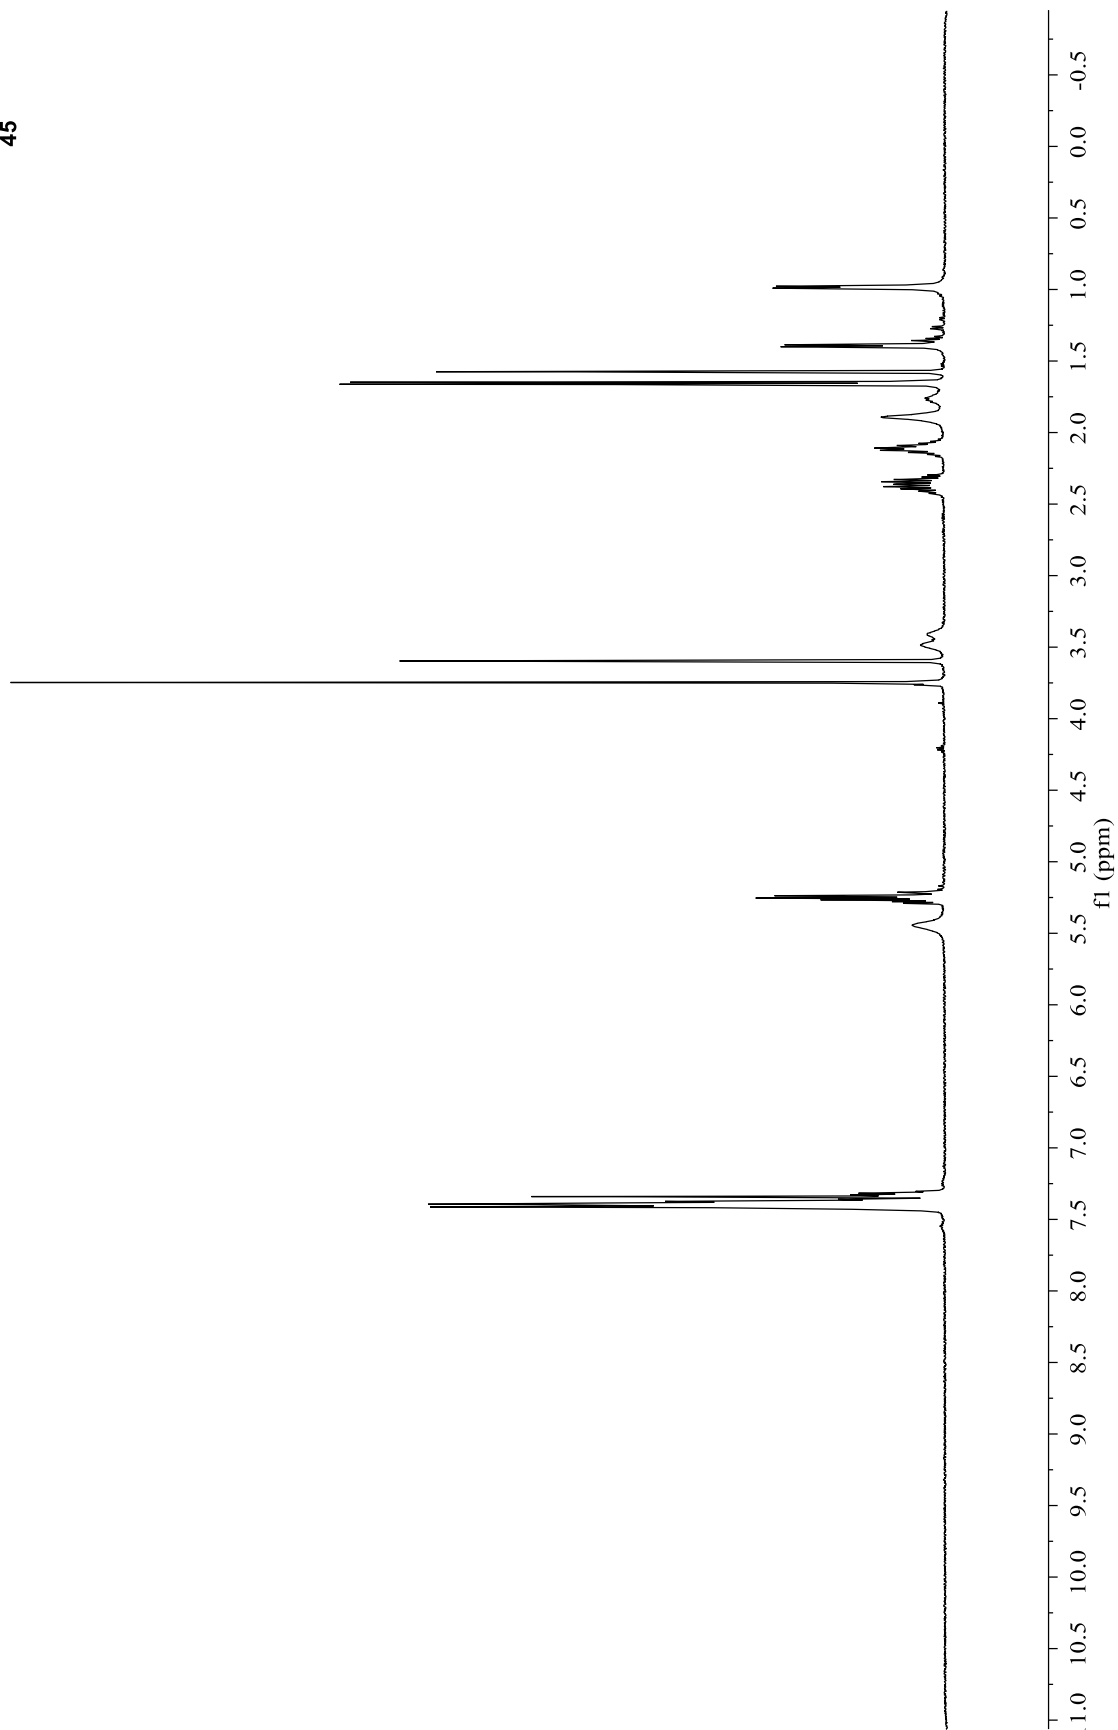



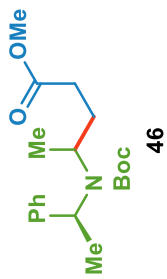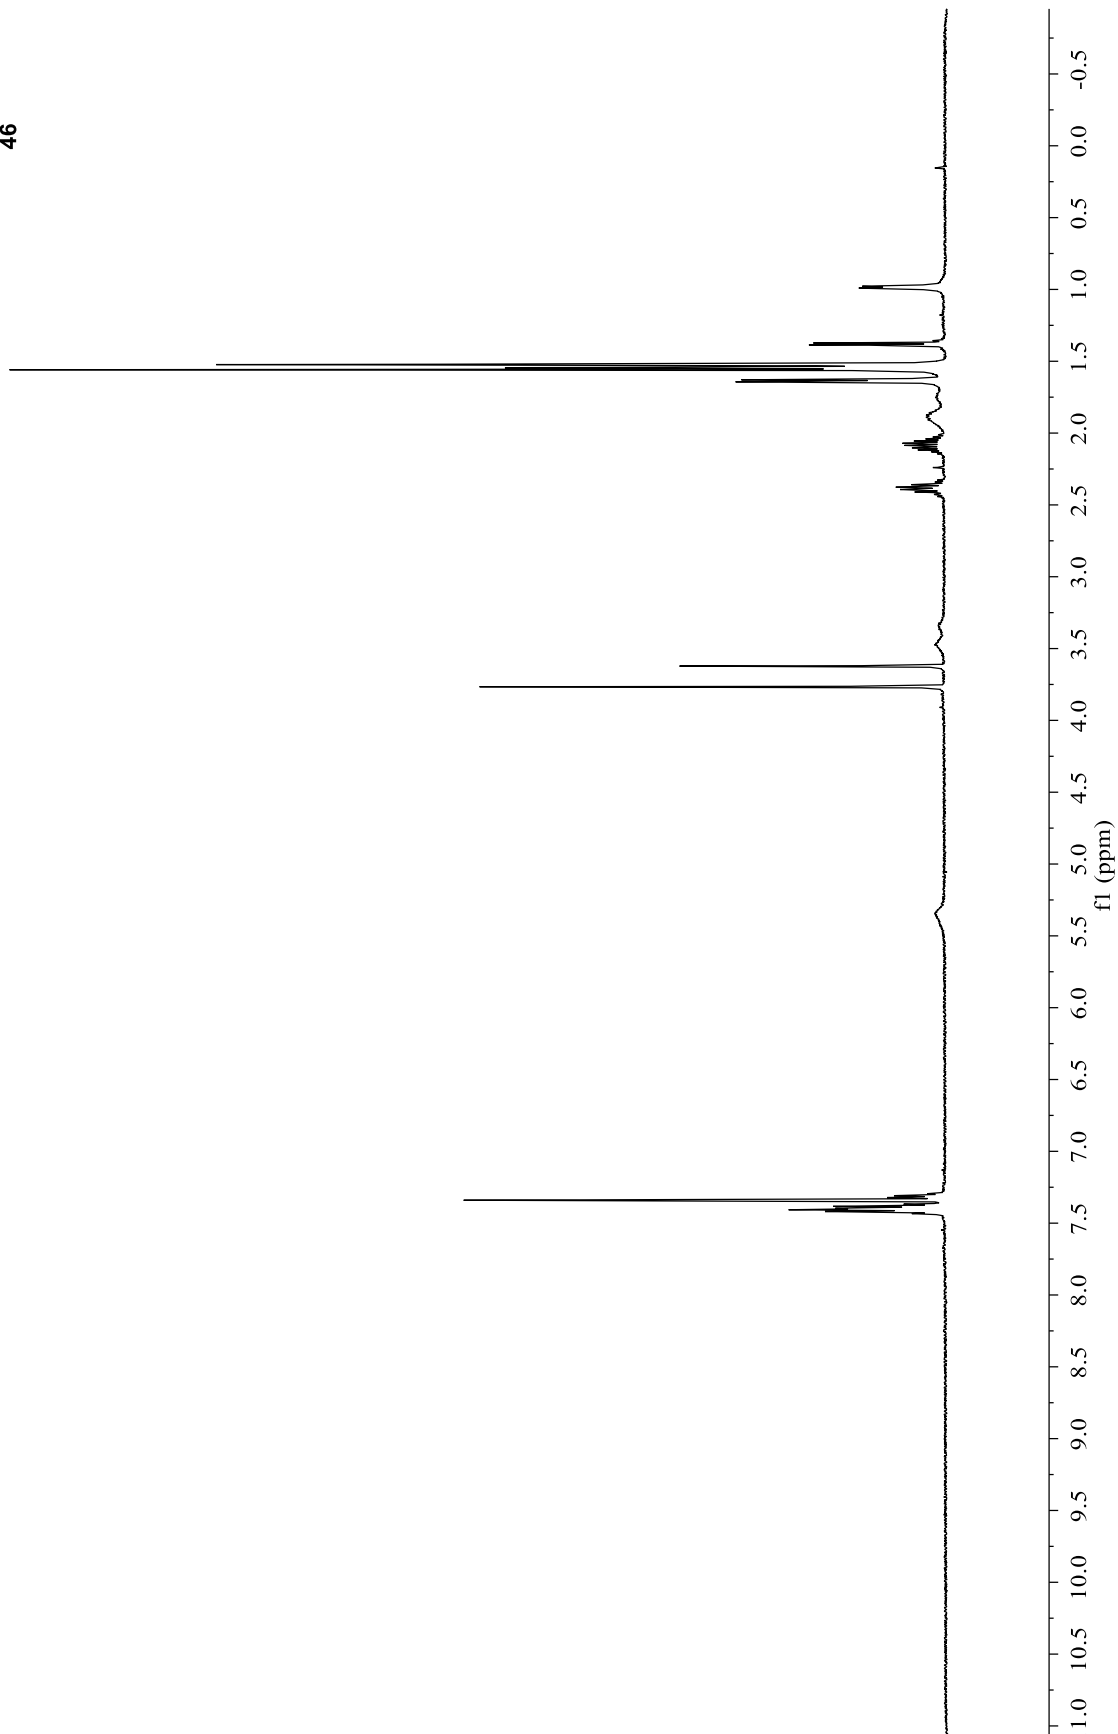

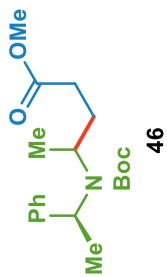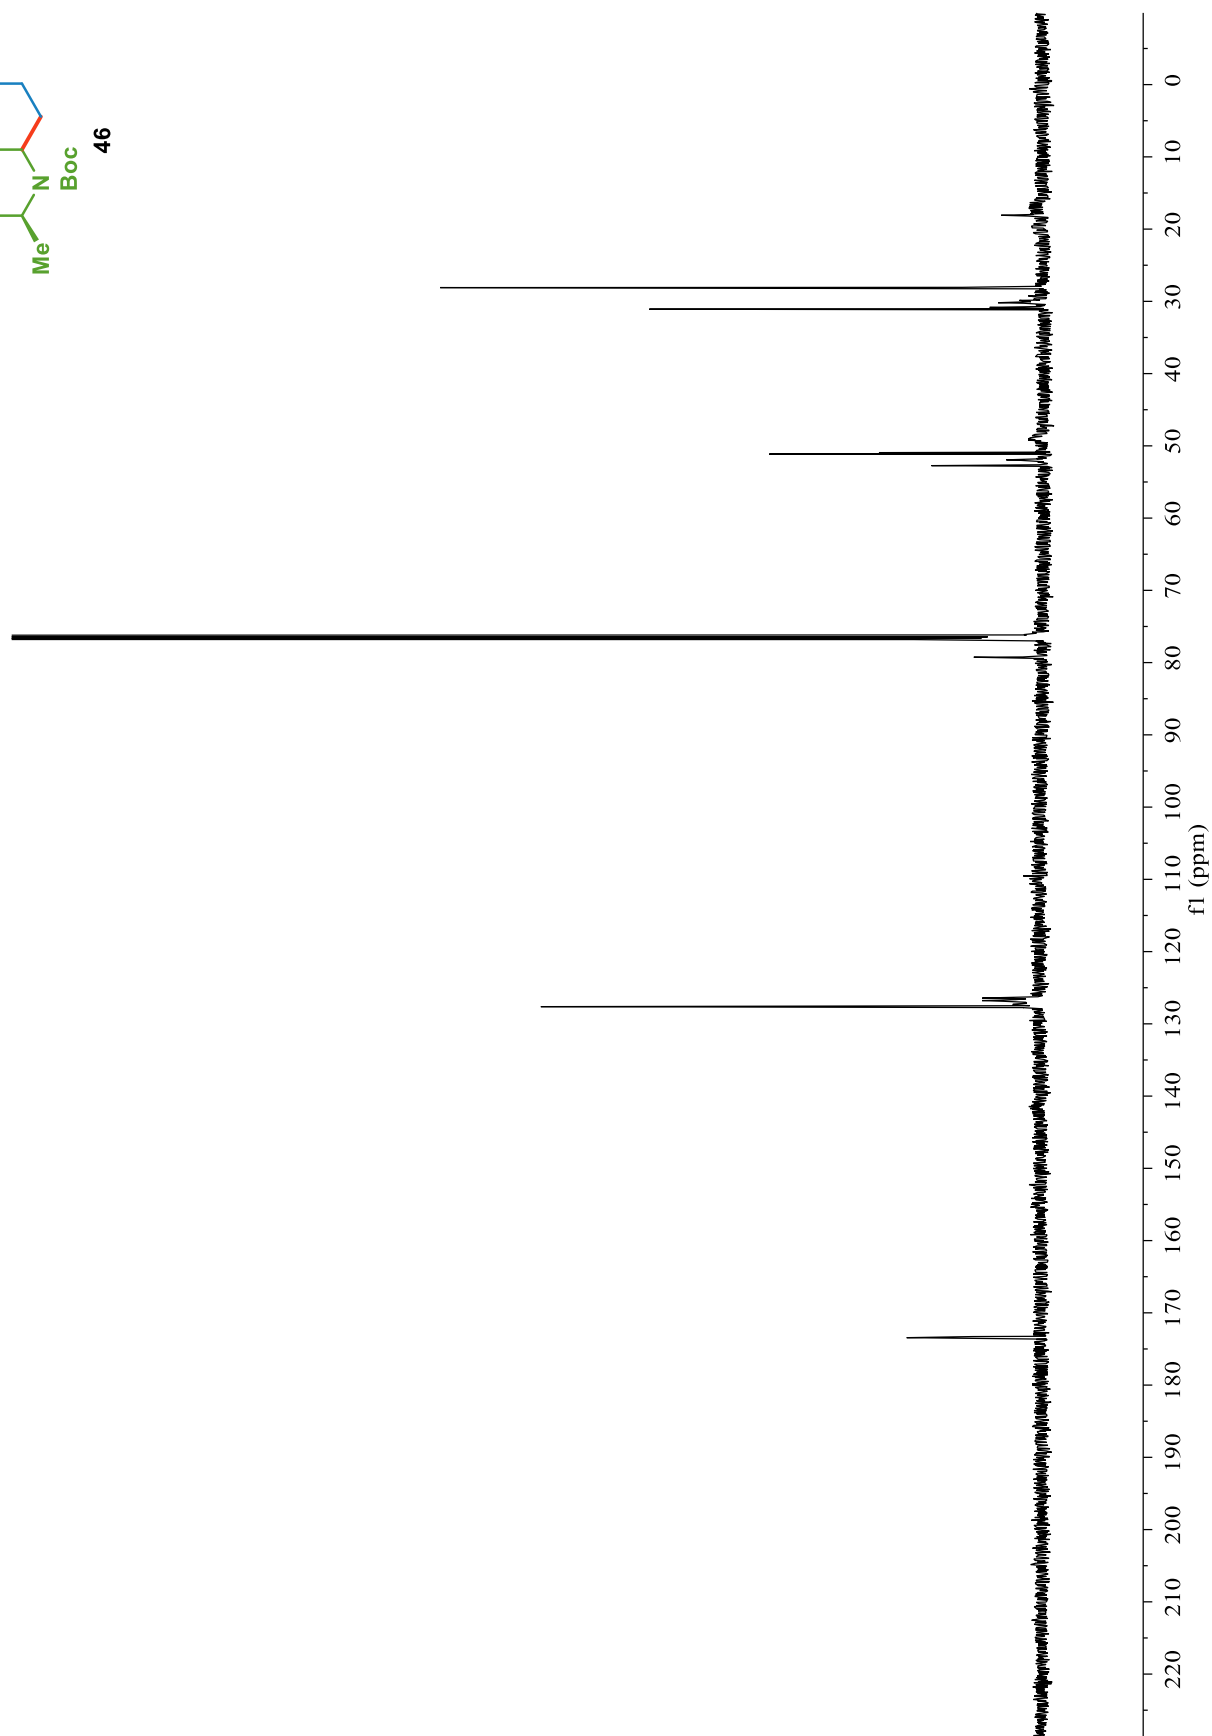

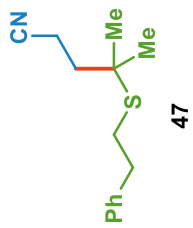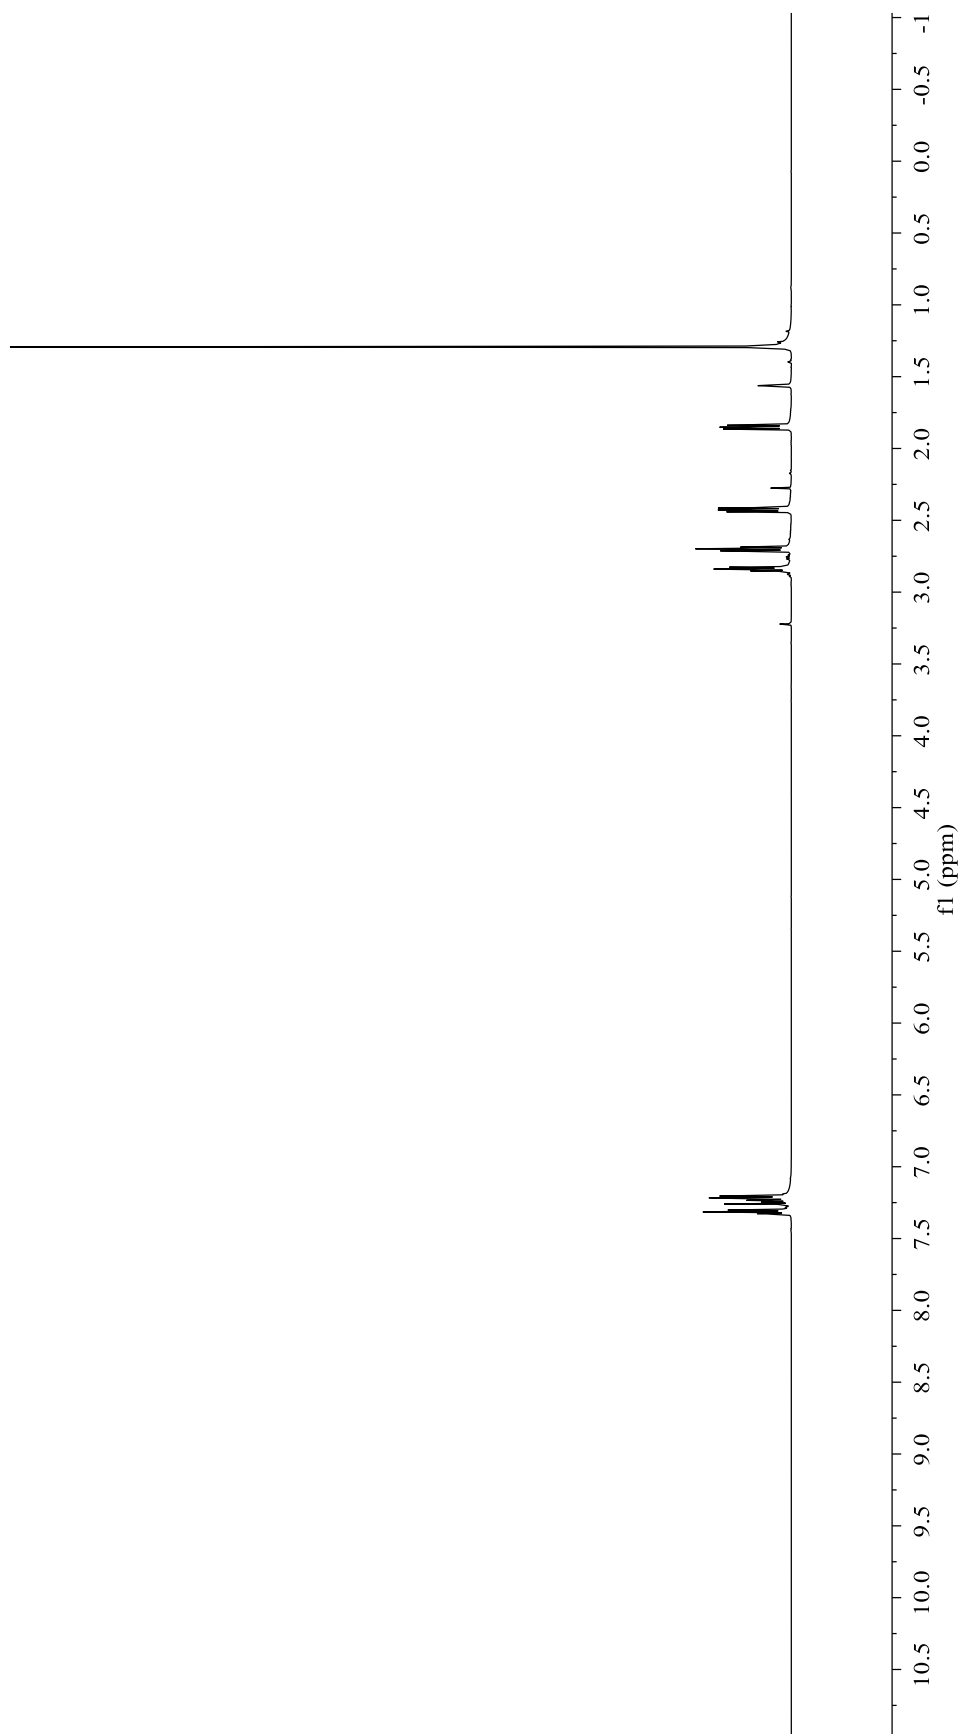

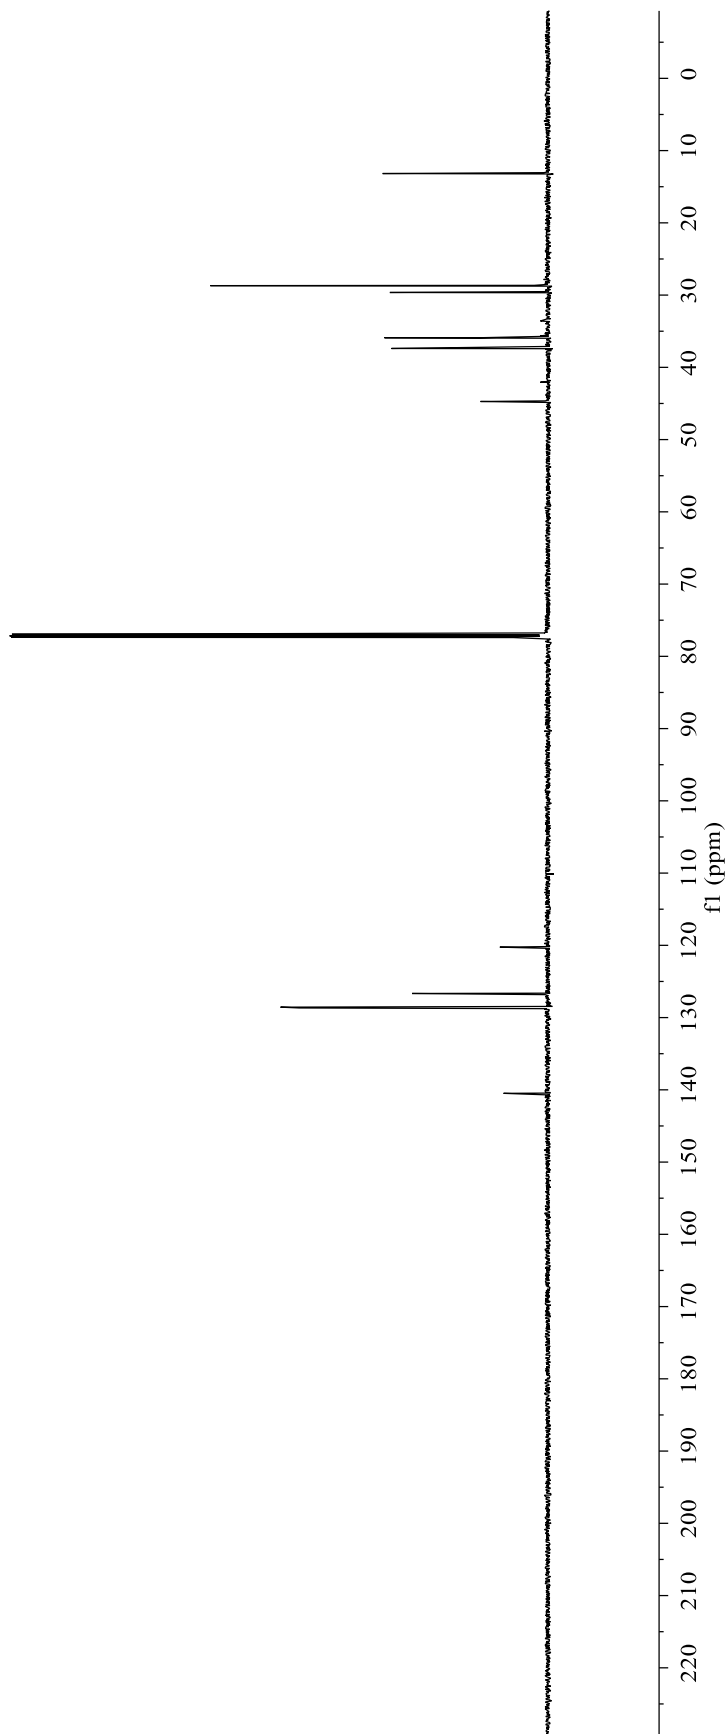



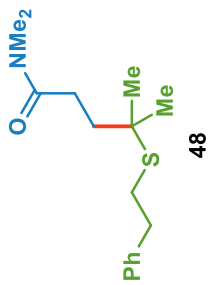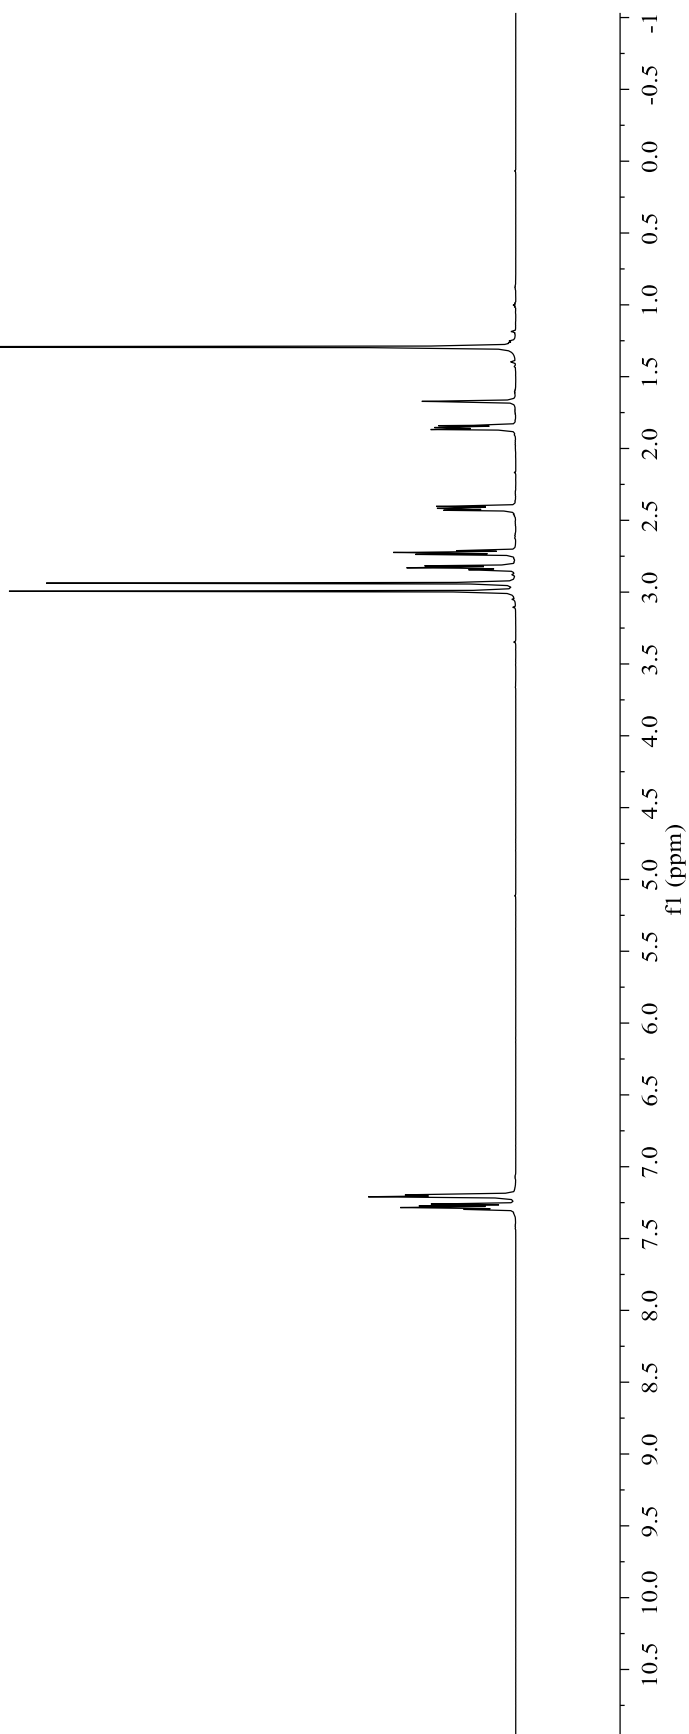

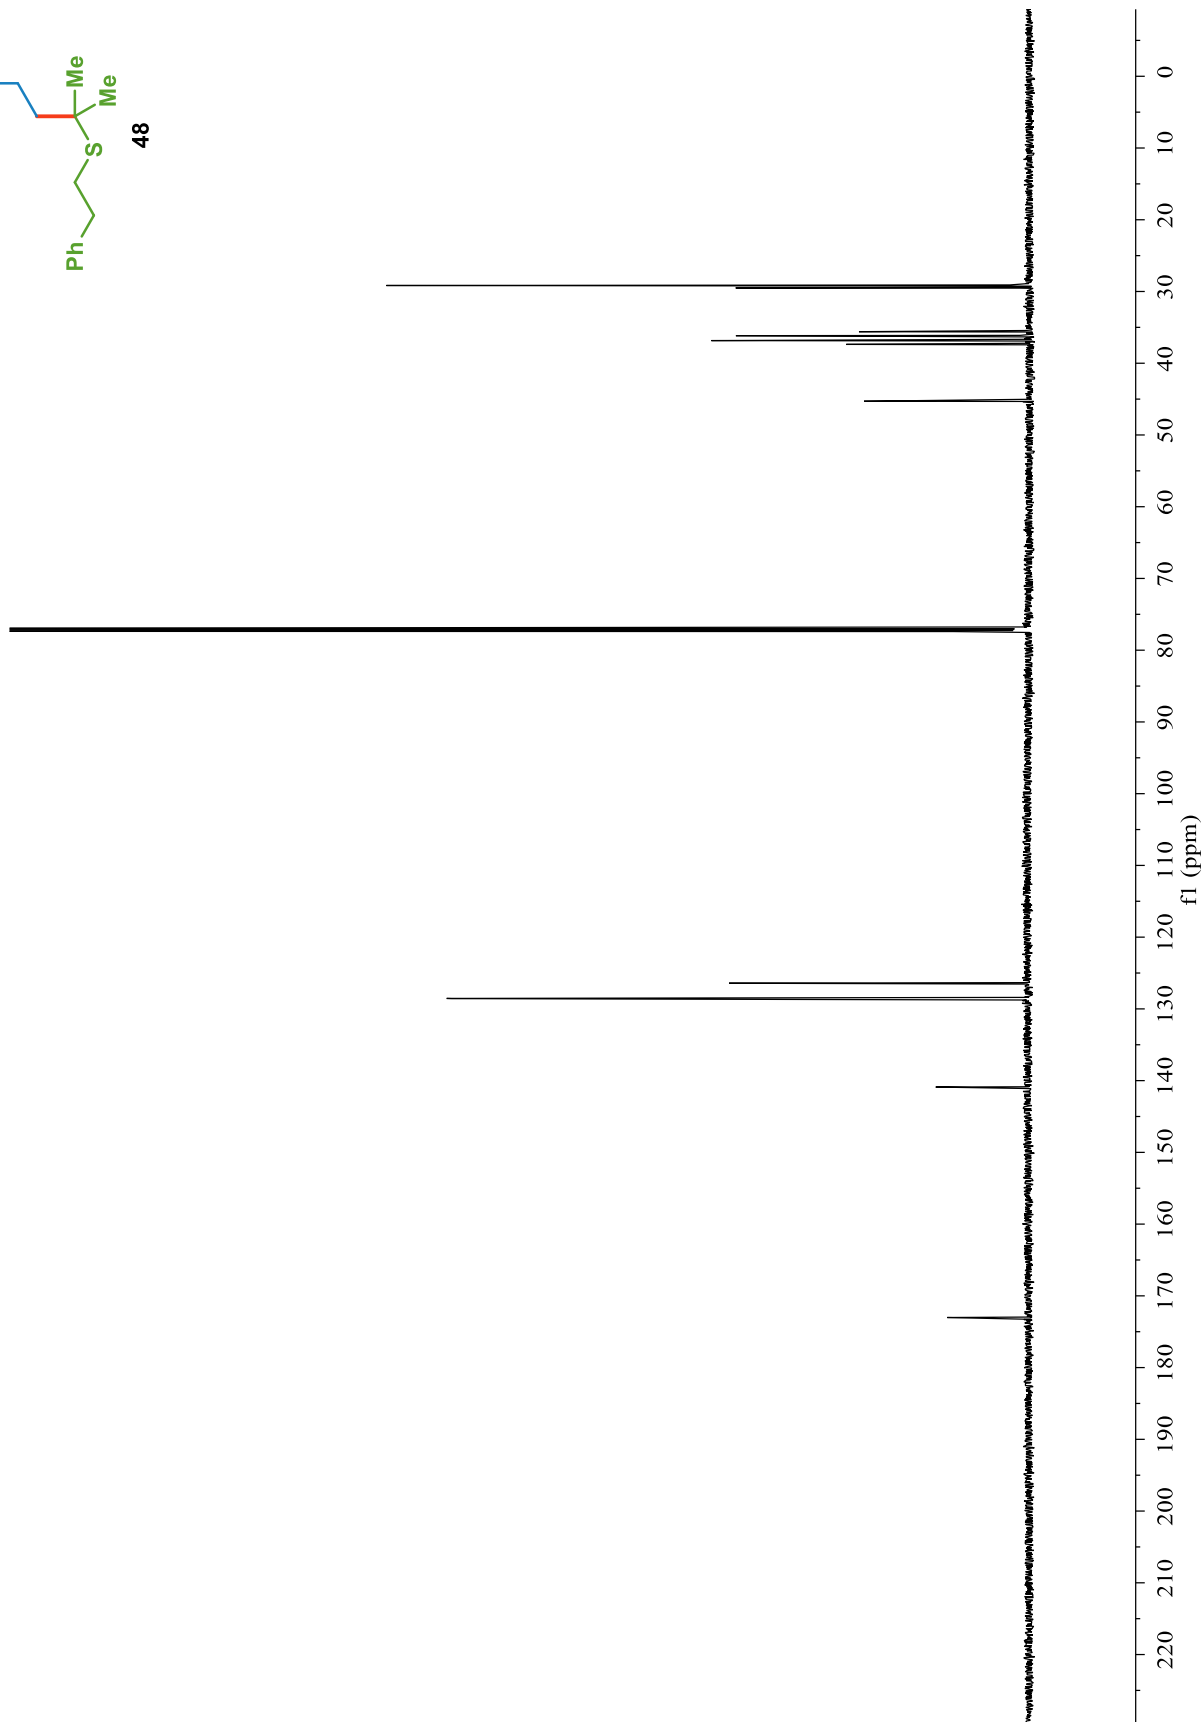

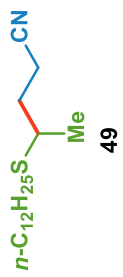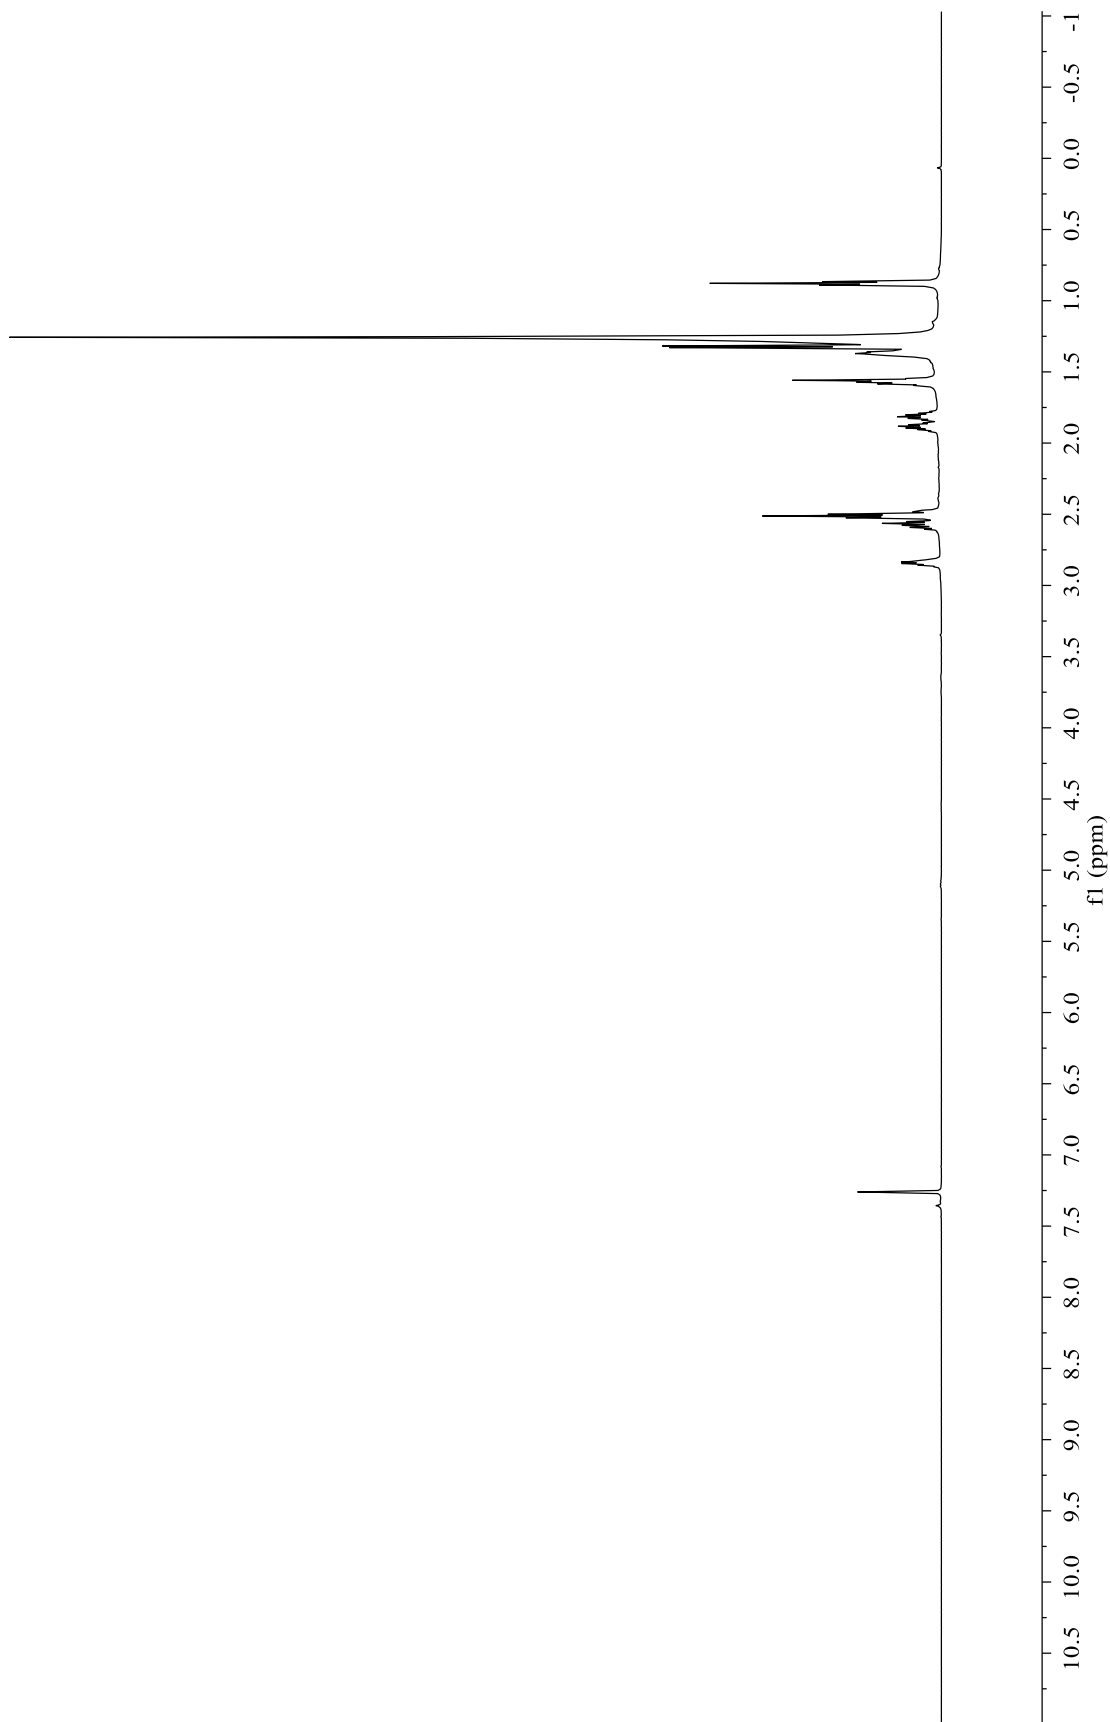

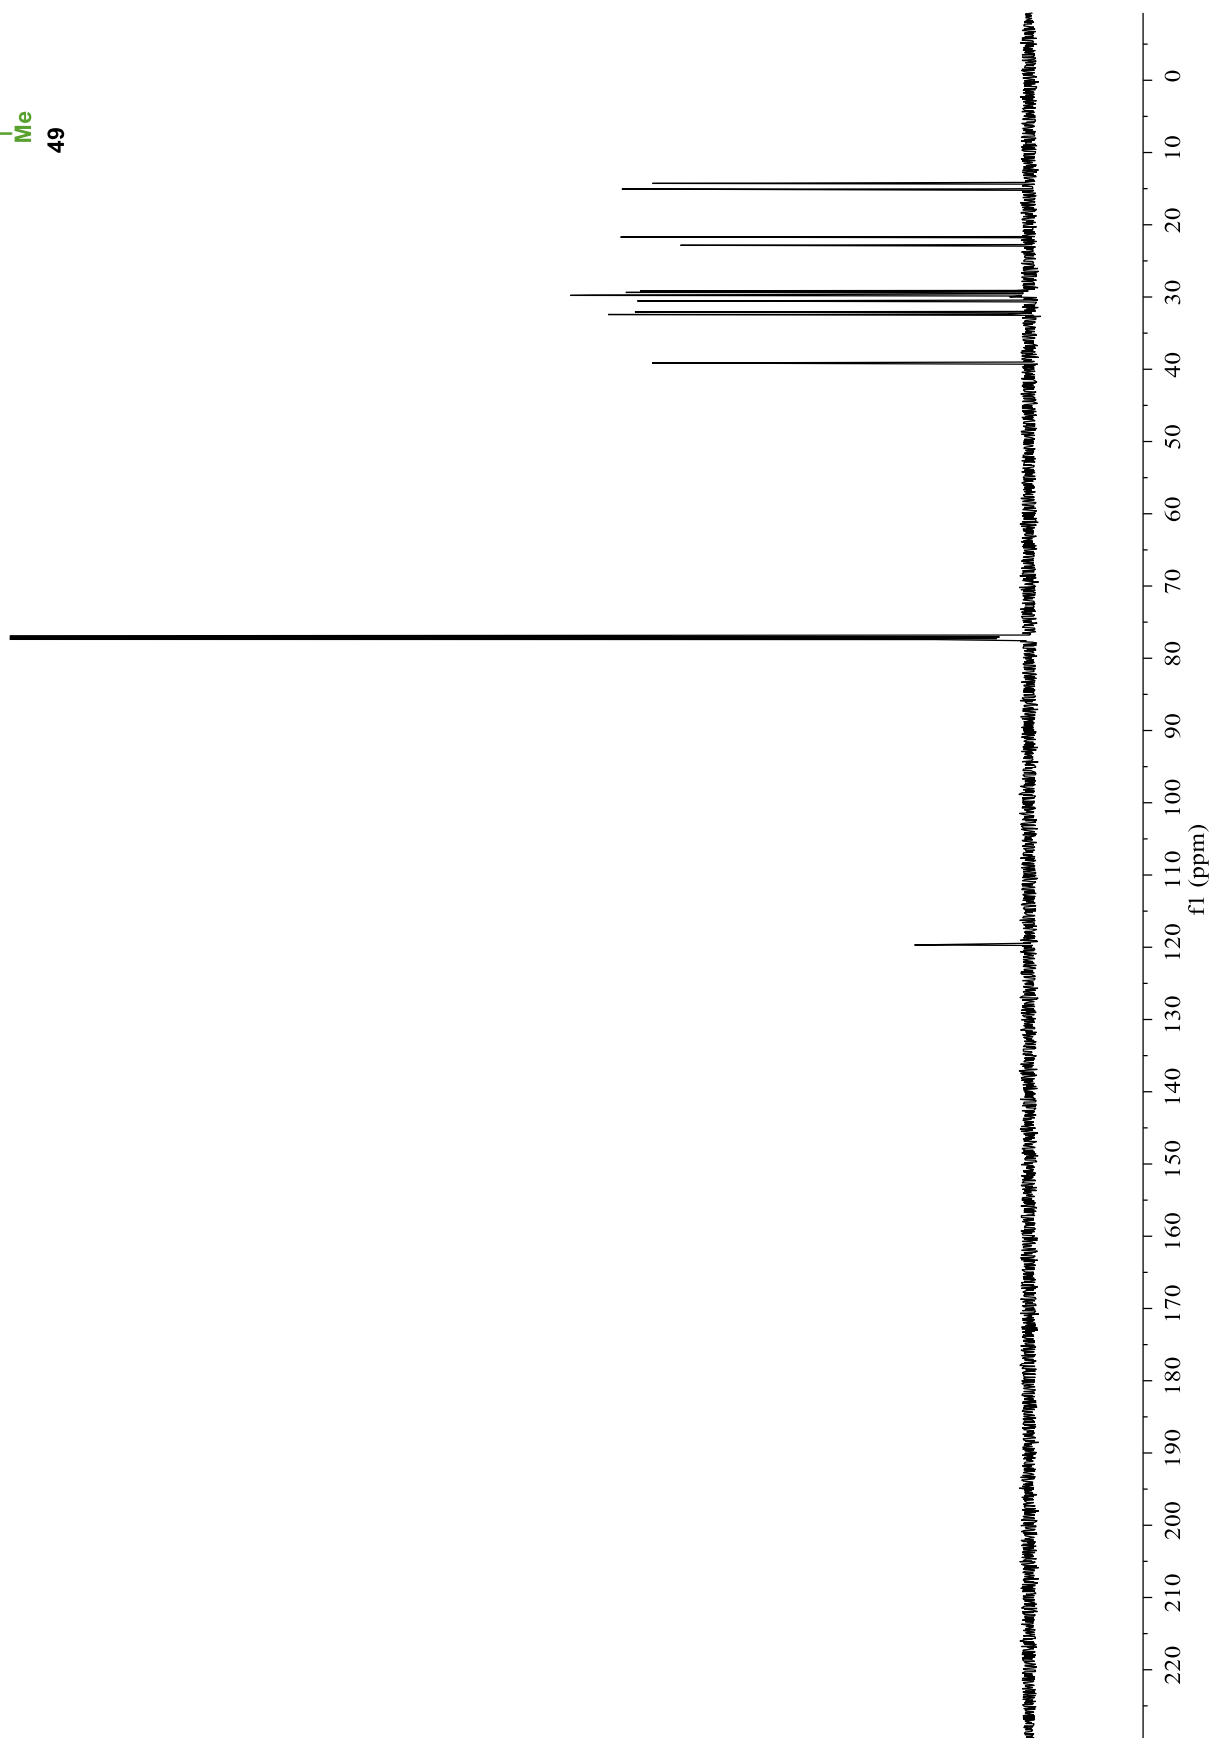

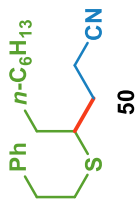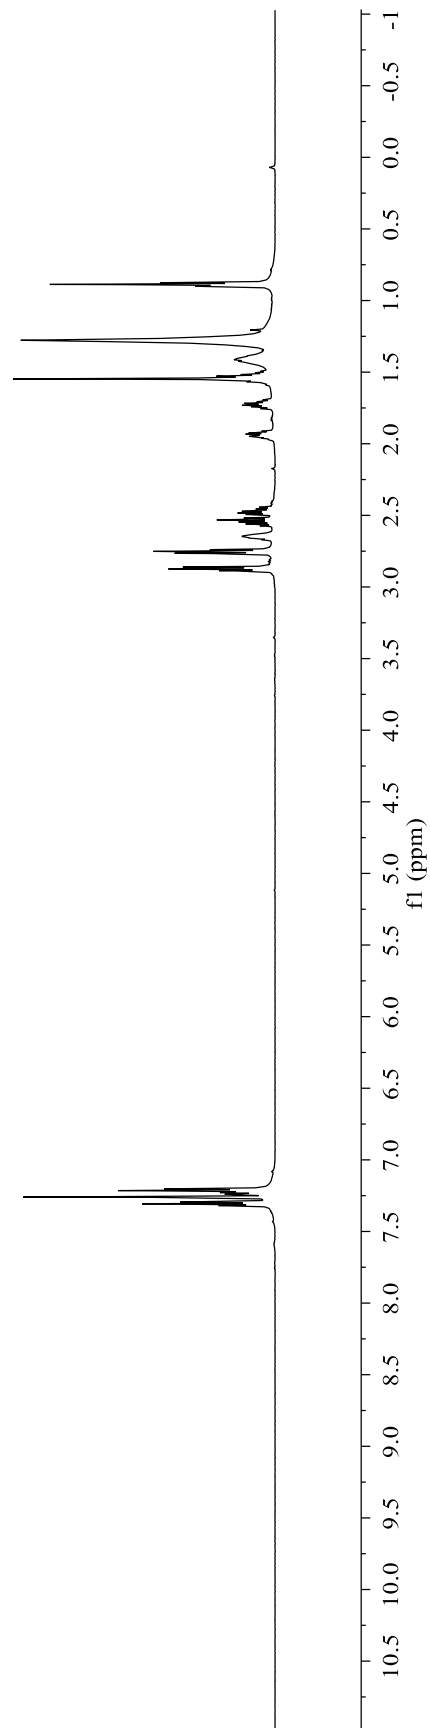

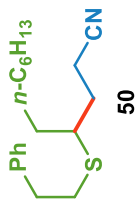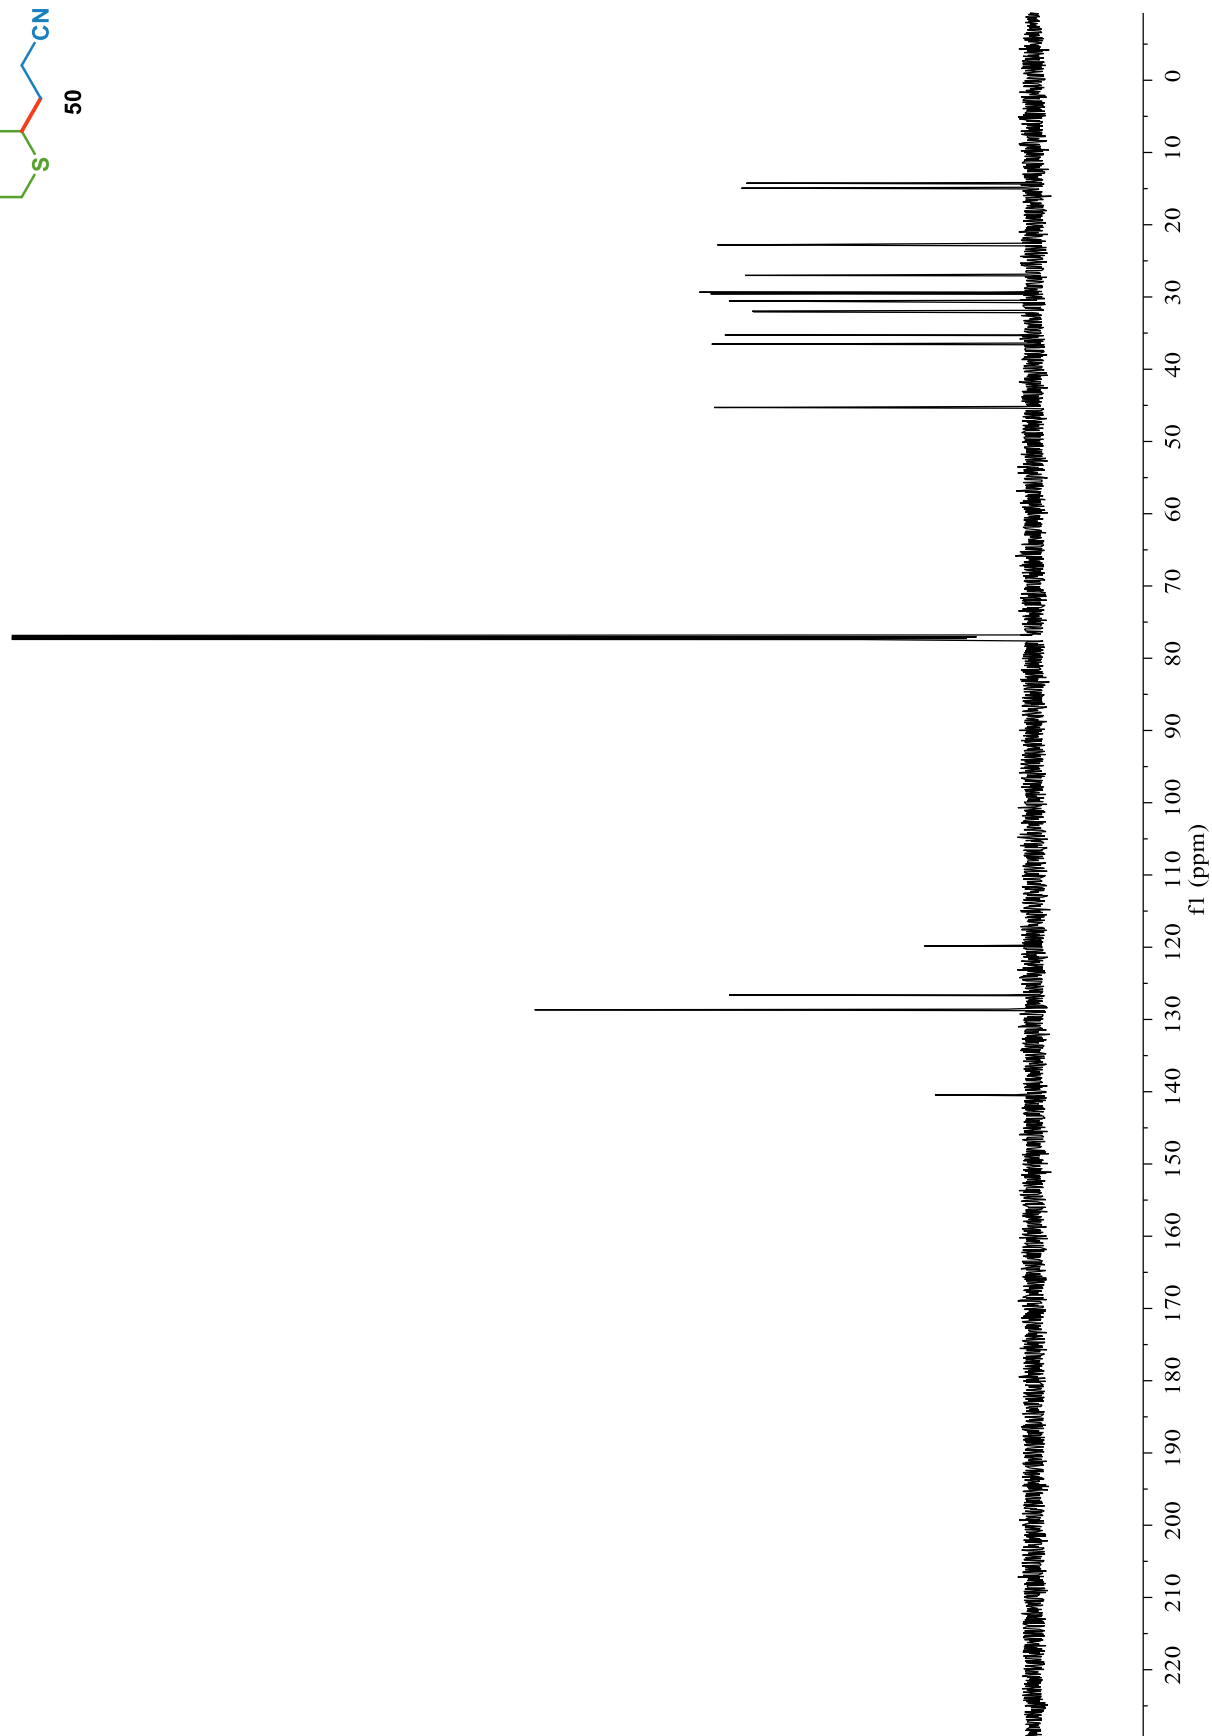

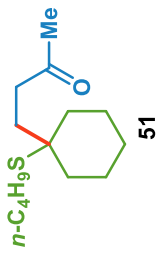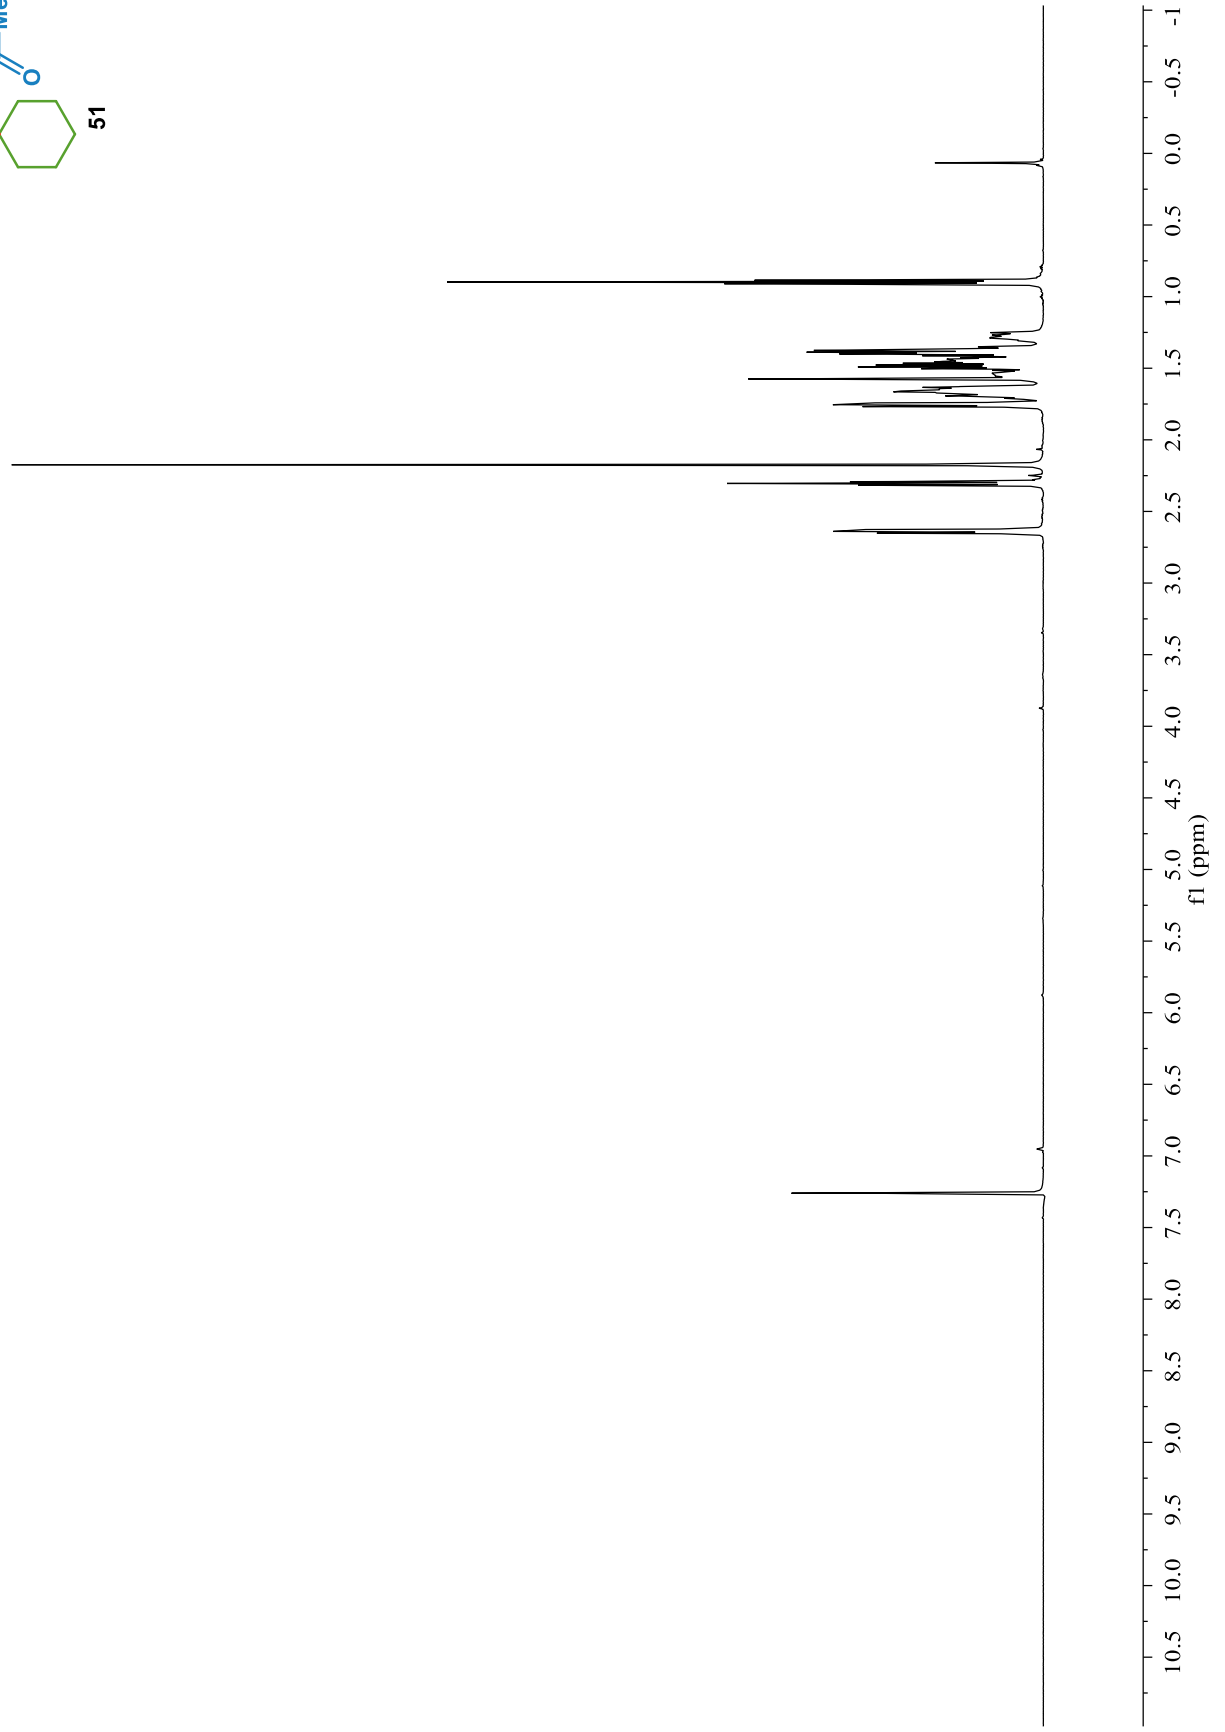

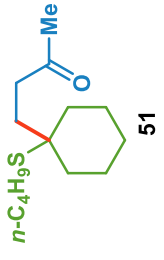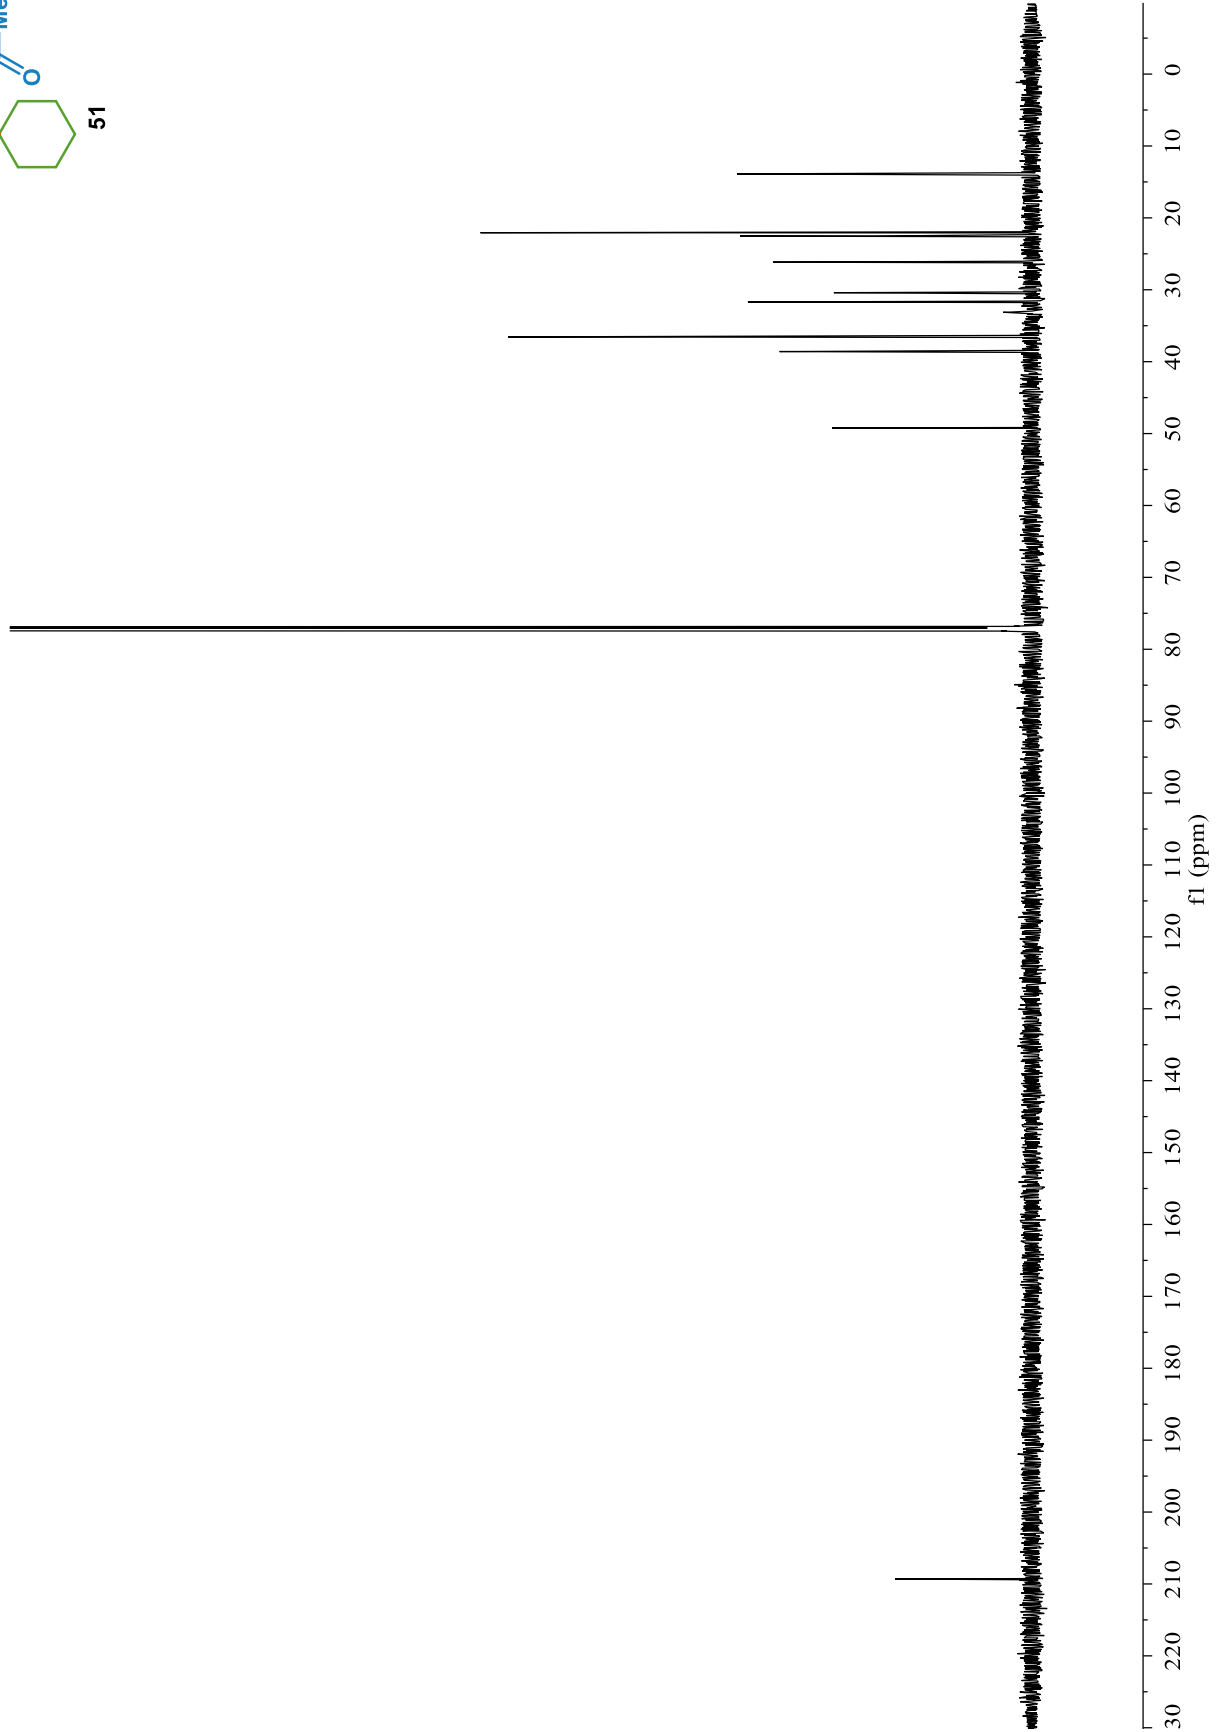



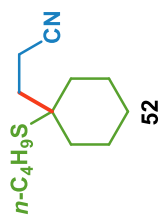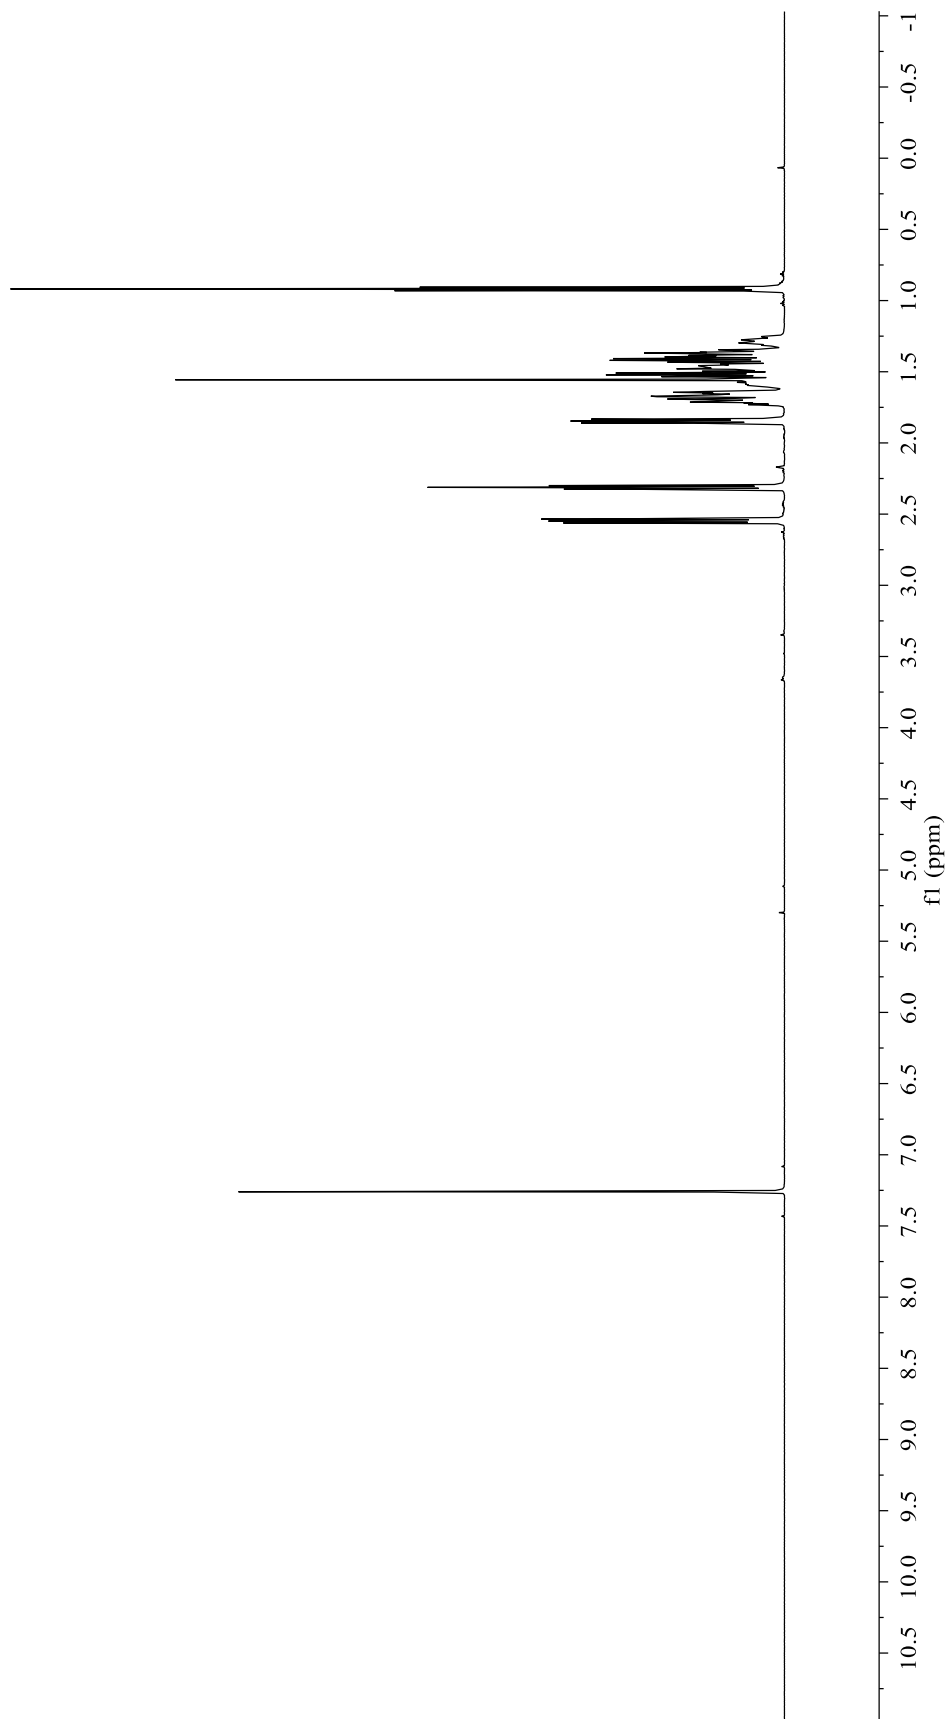

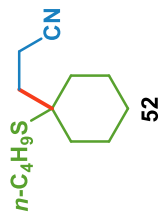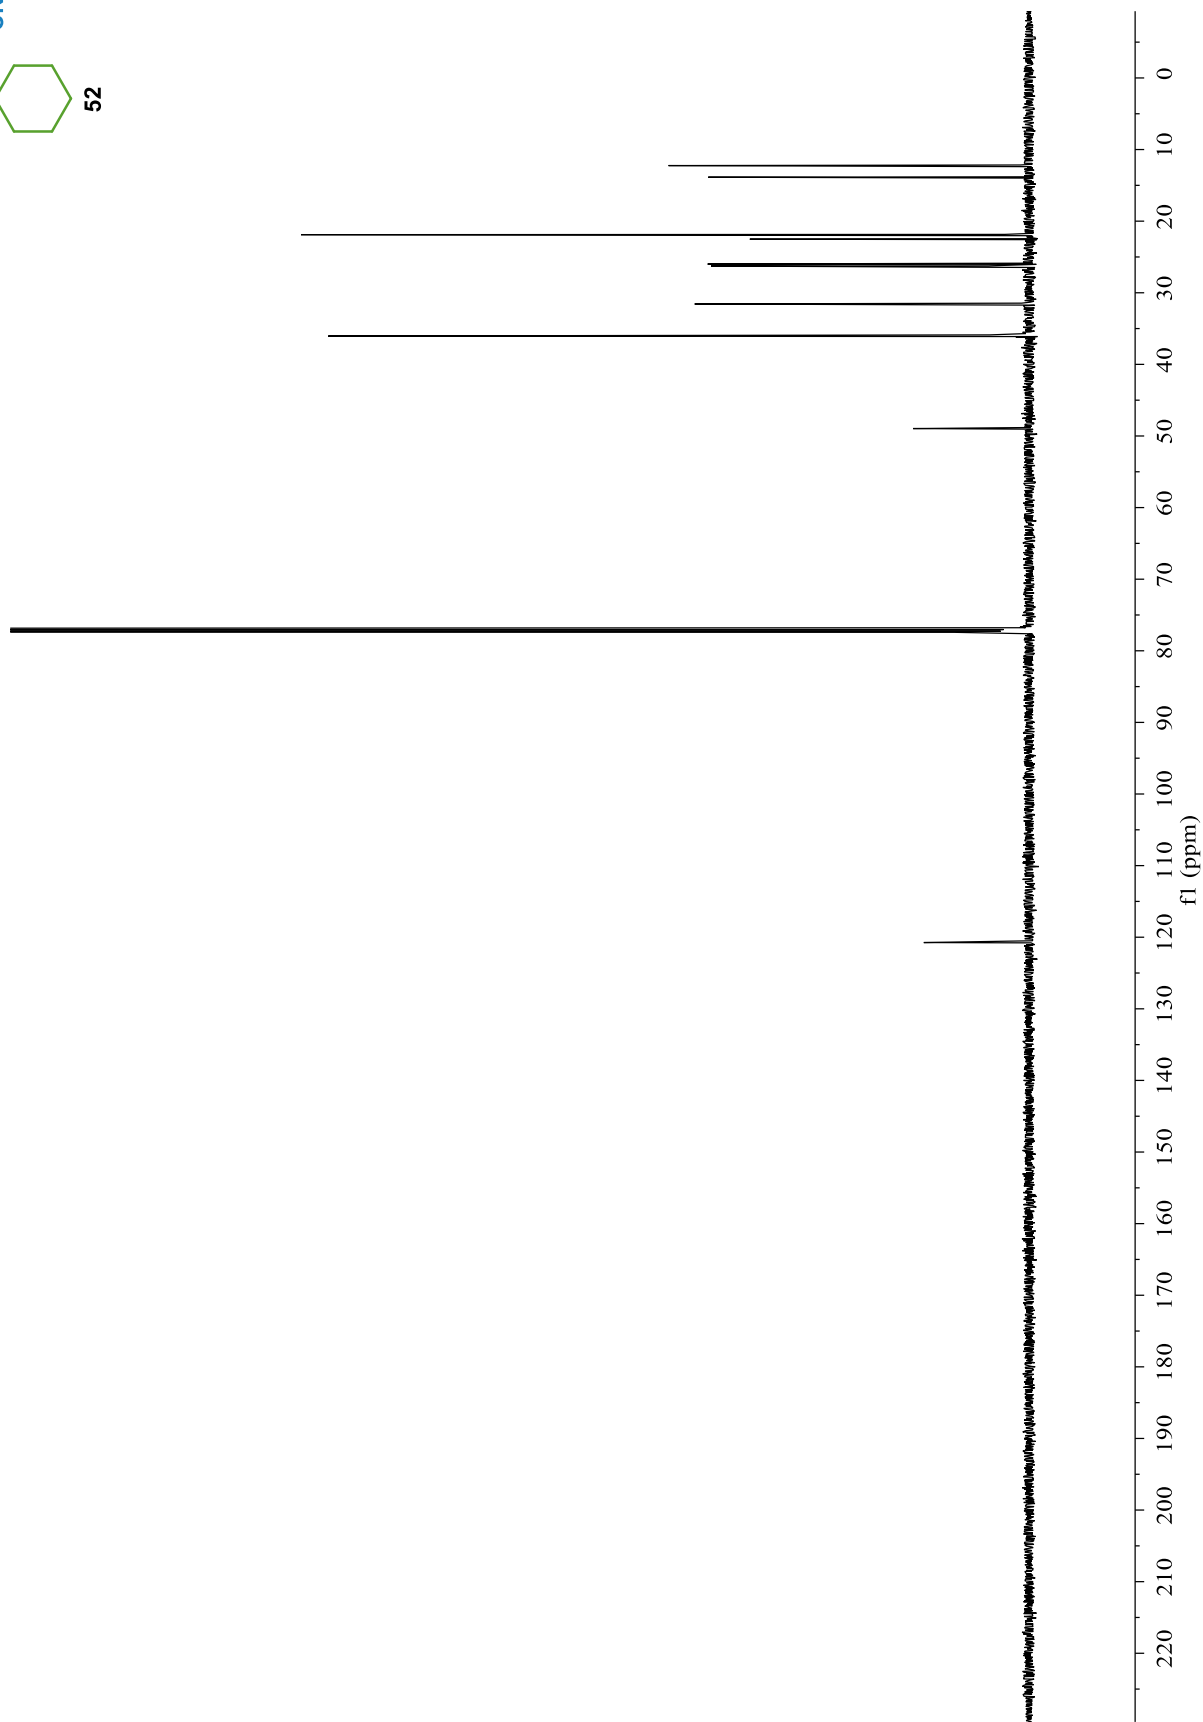

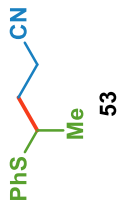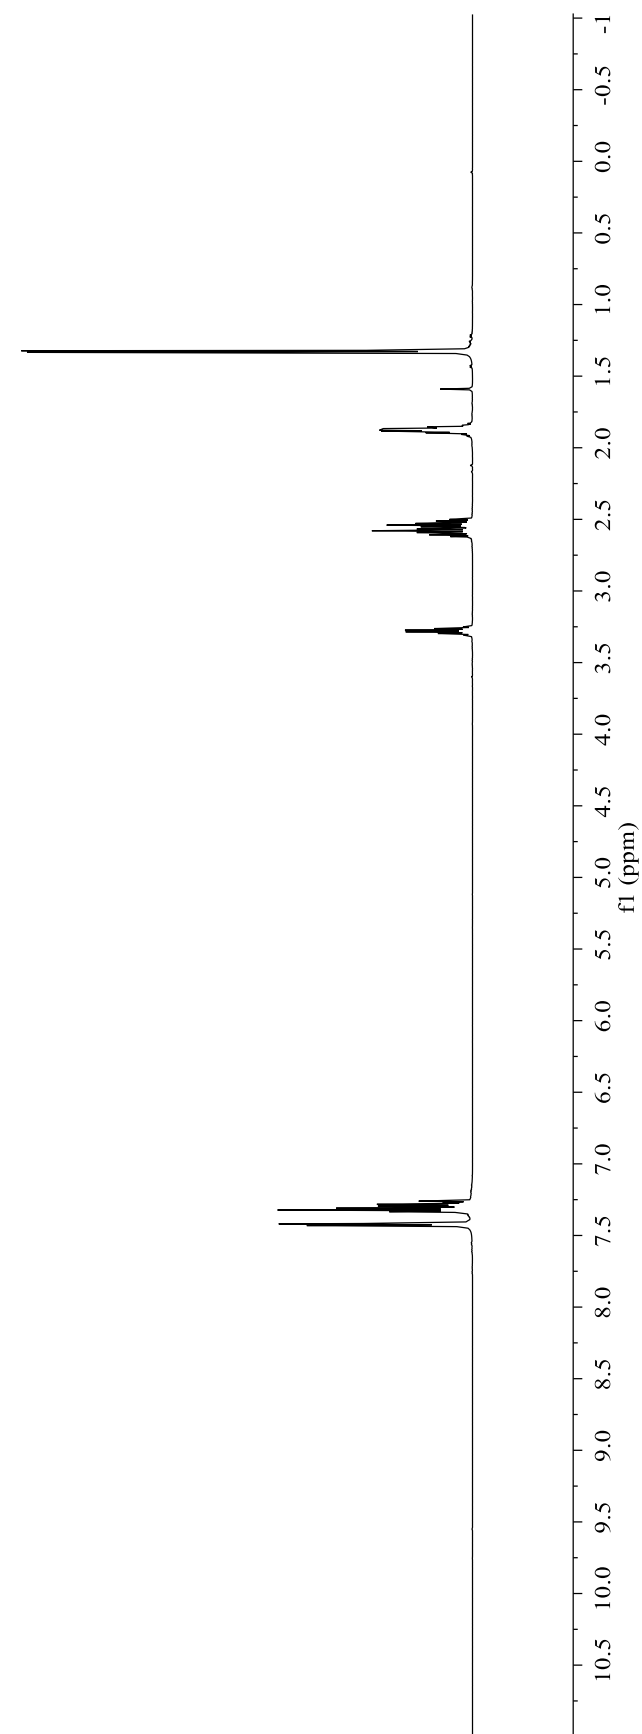

S144

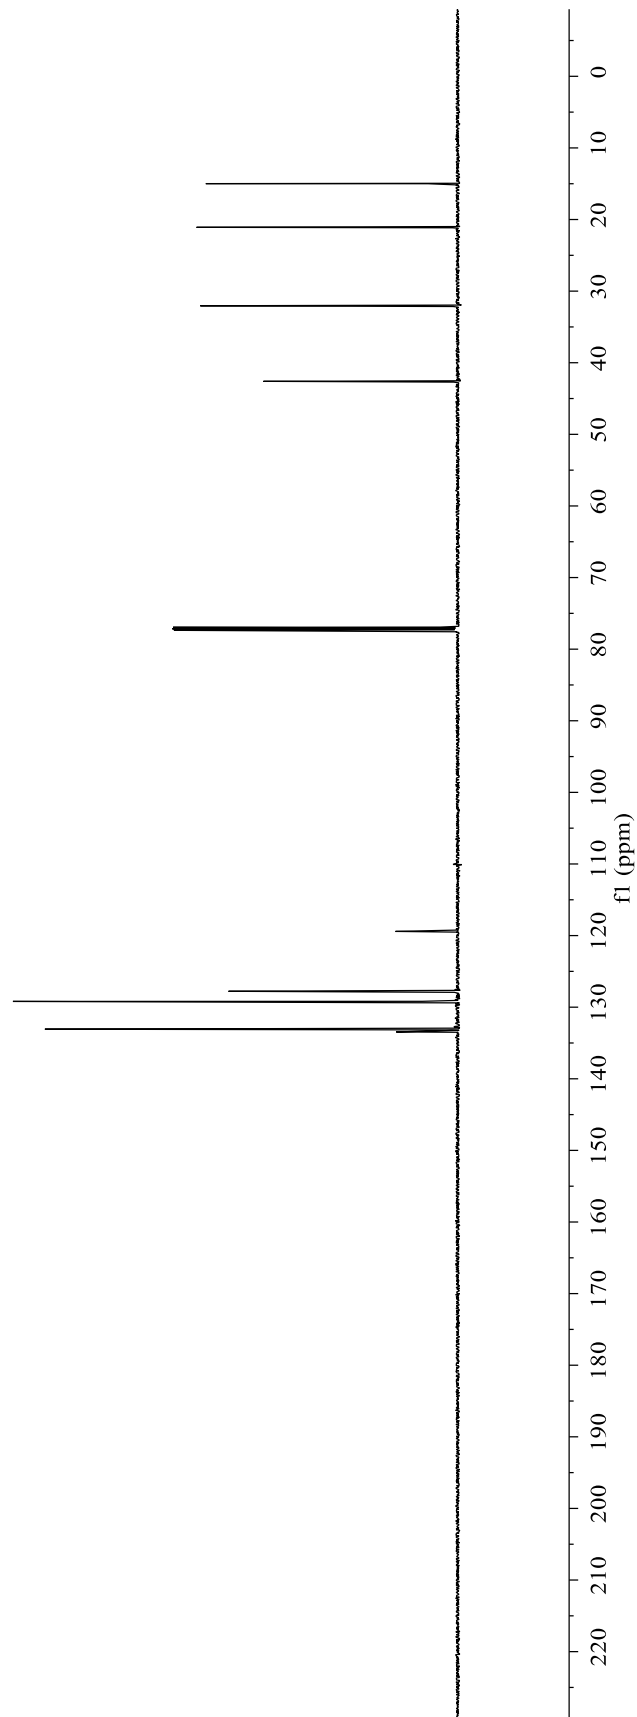

S145

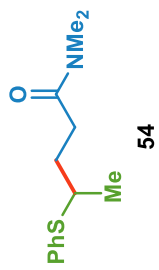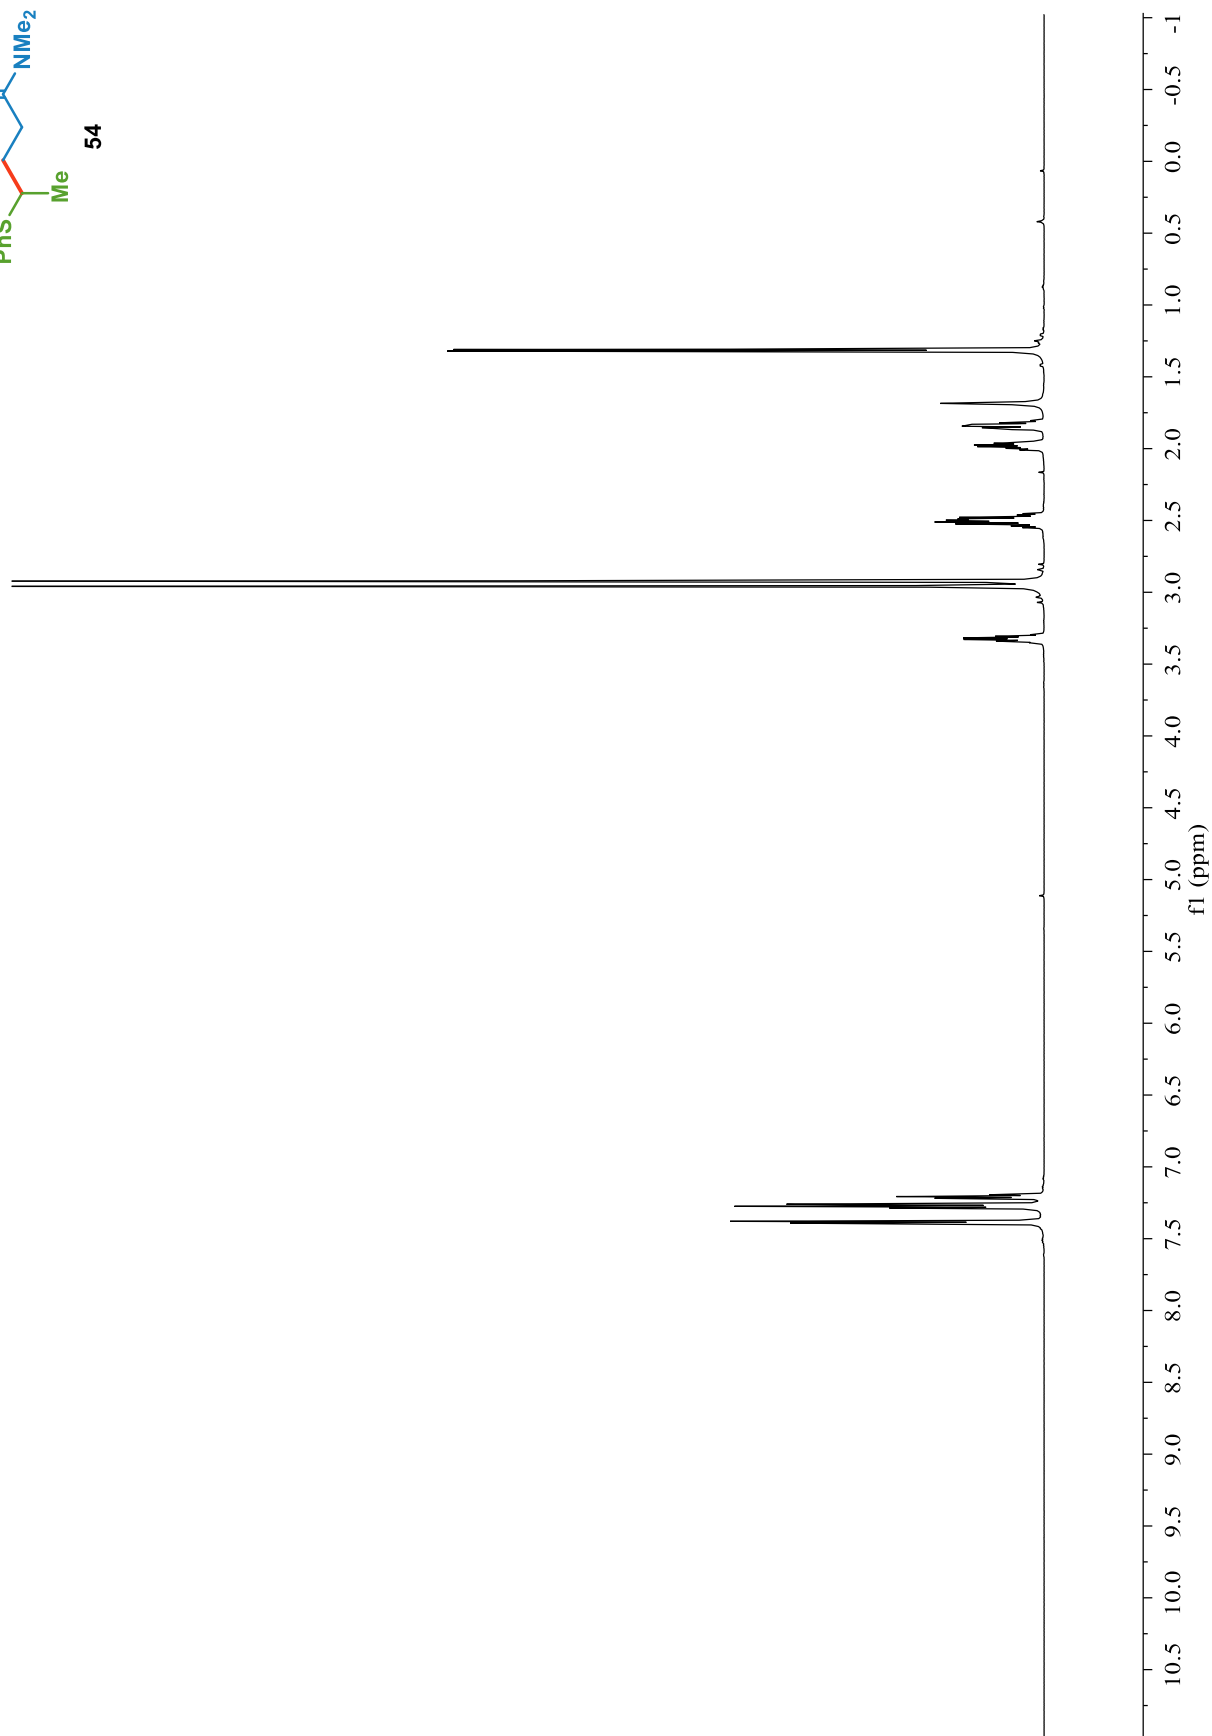

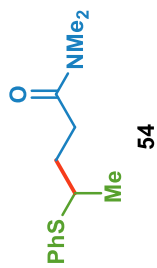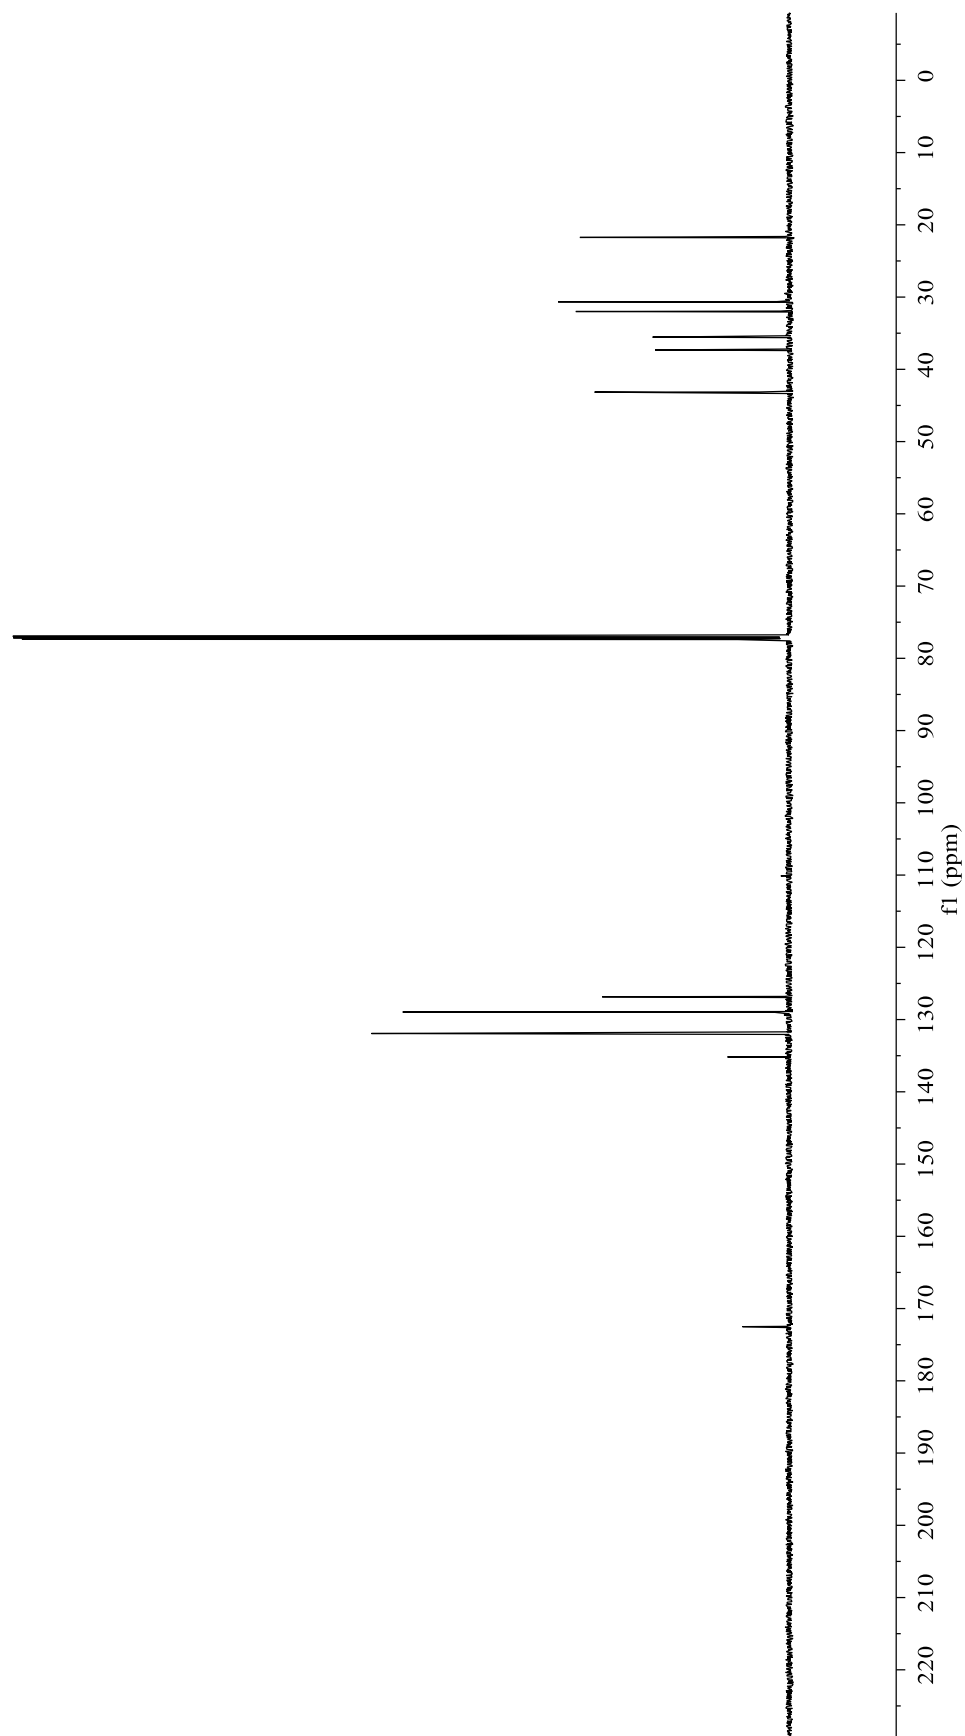

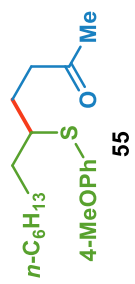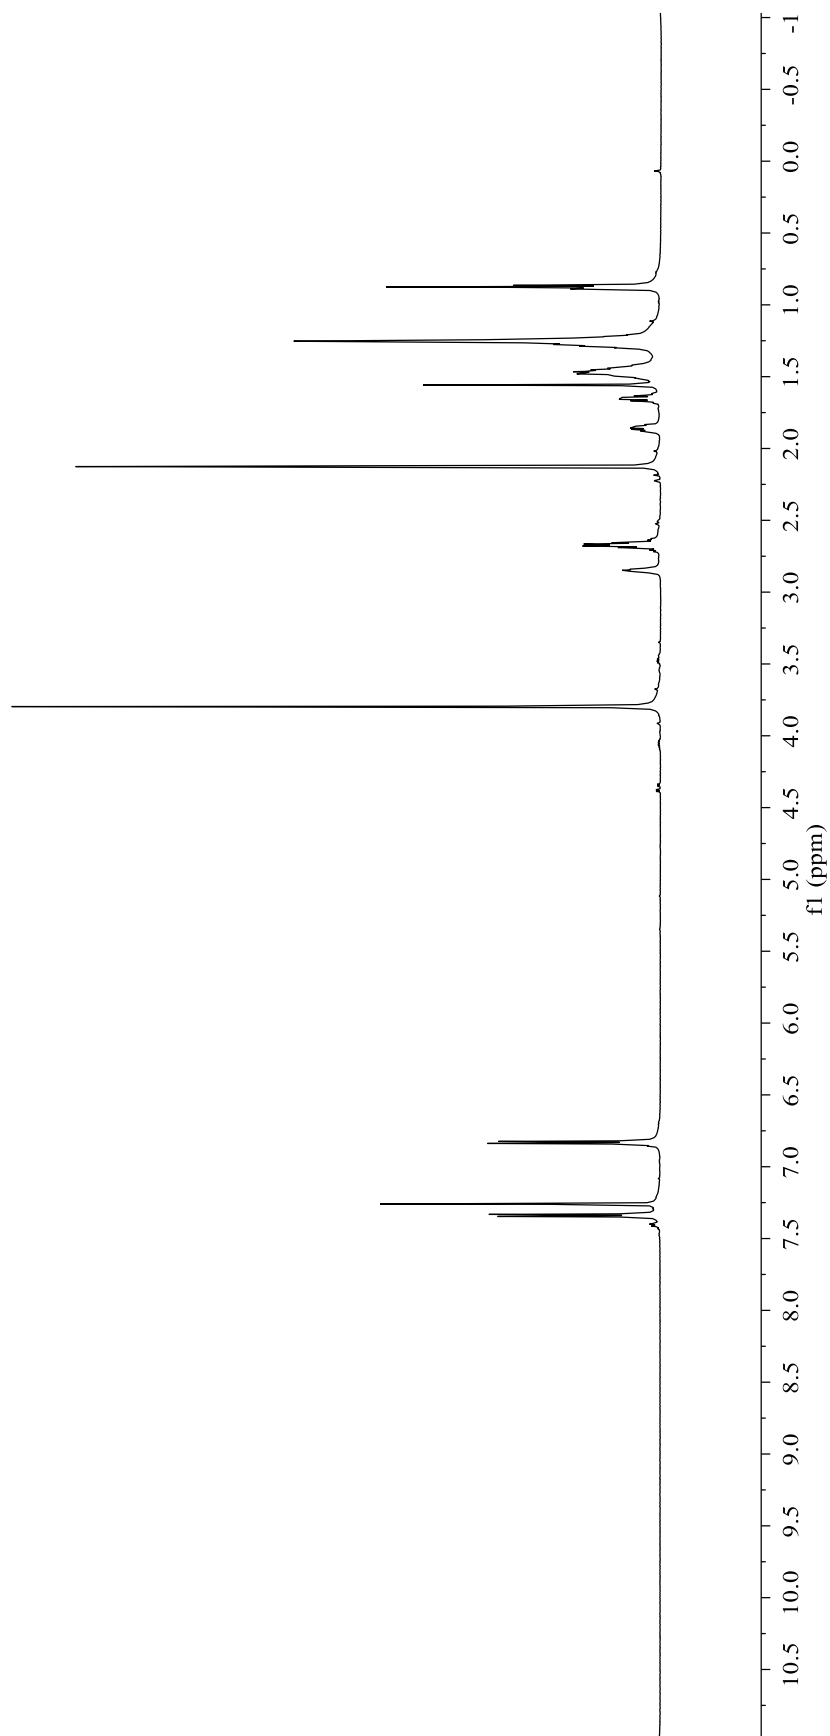

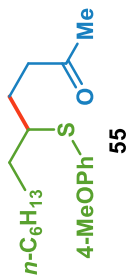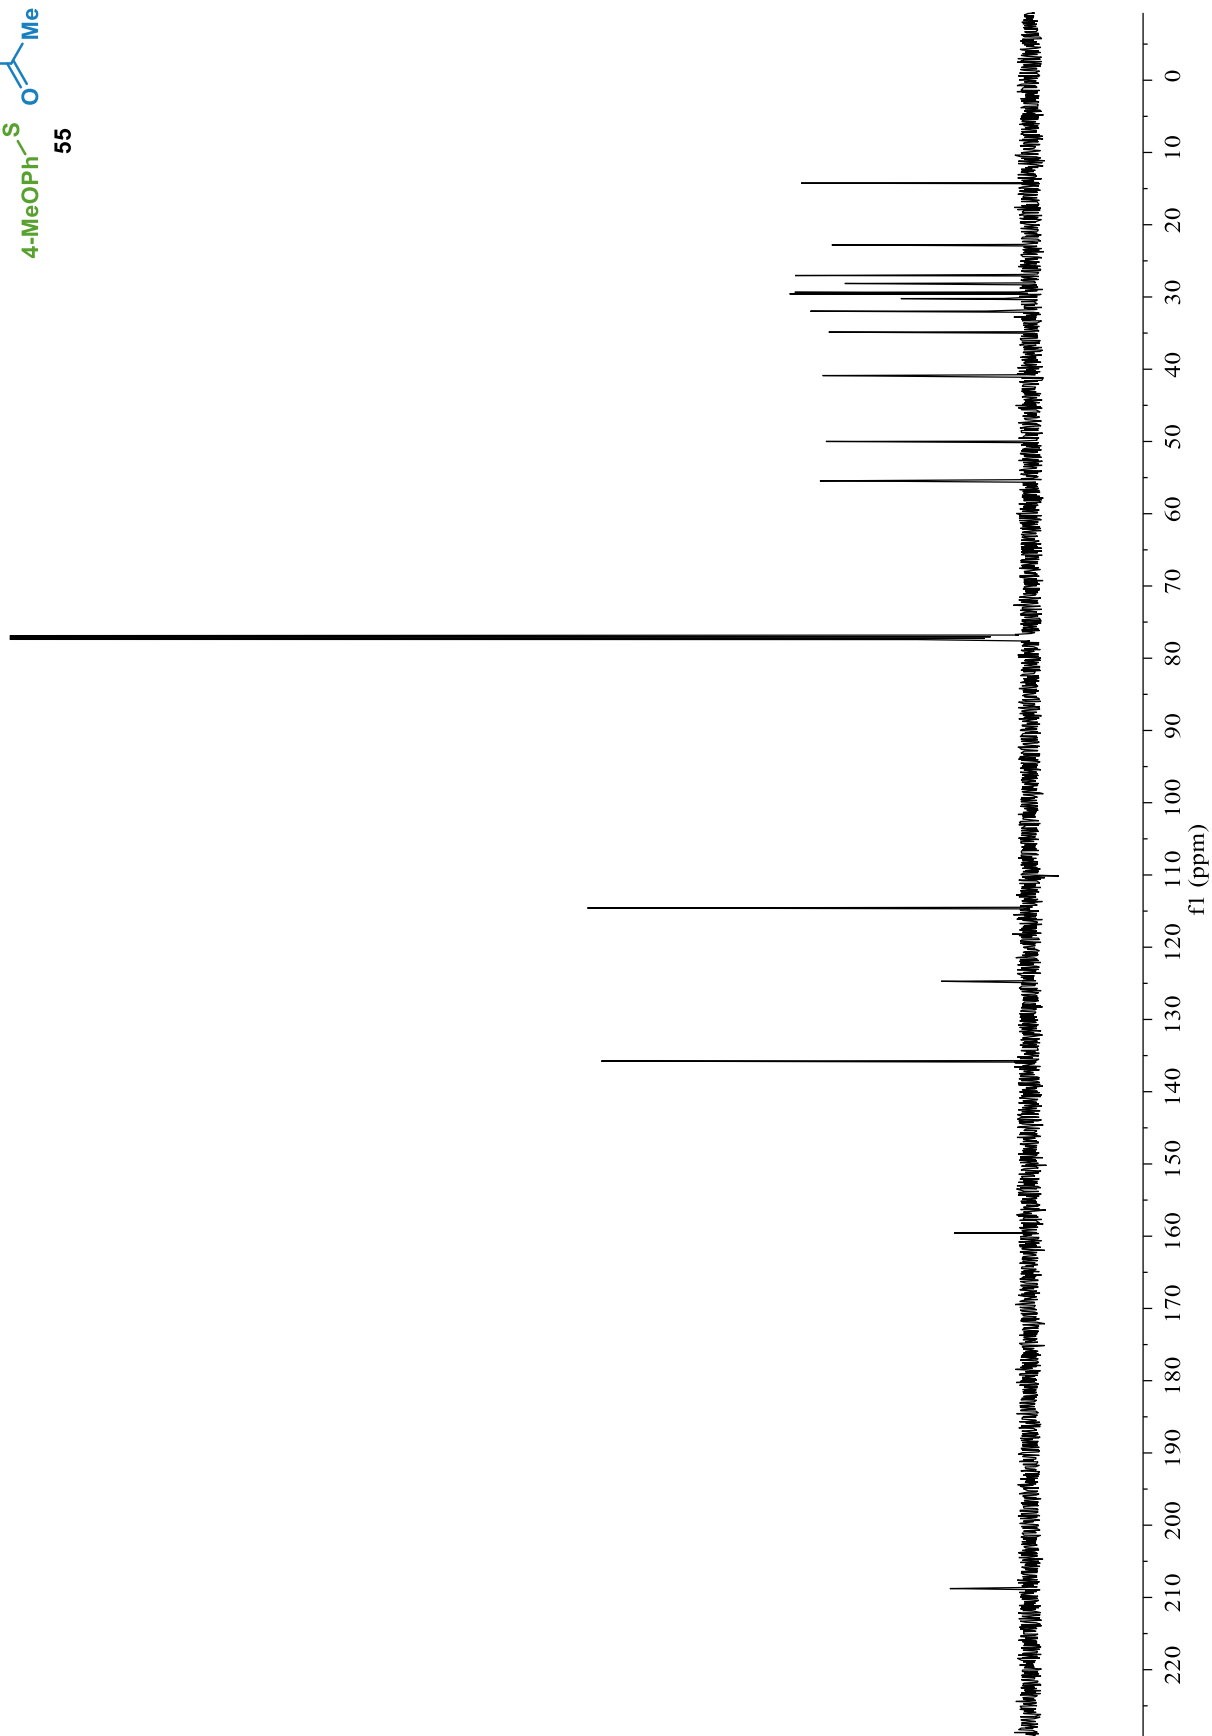



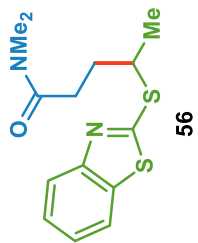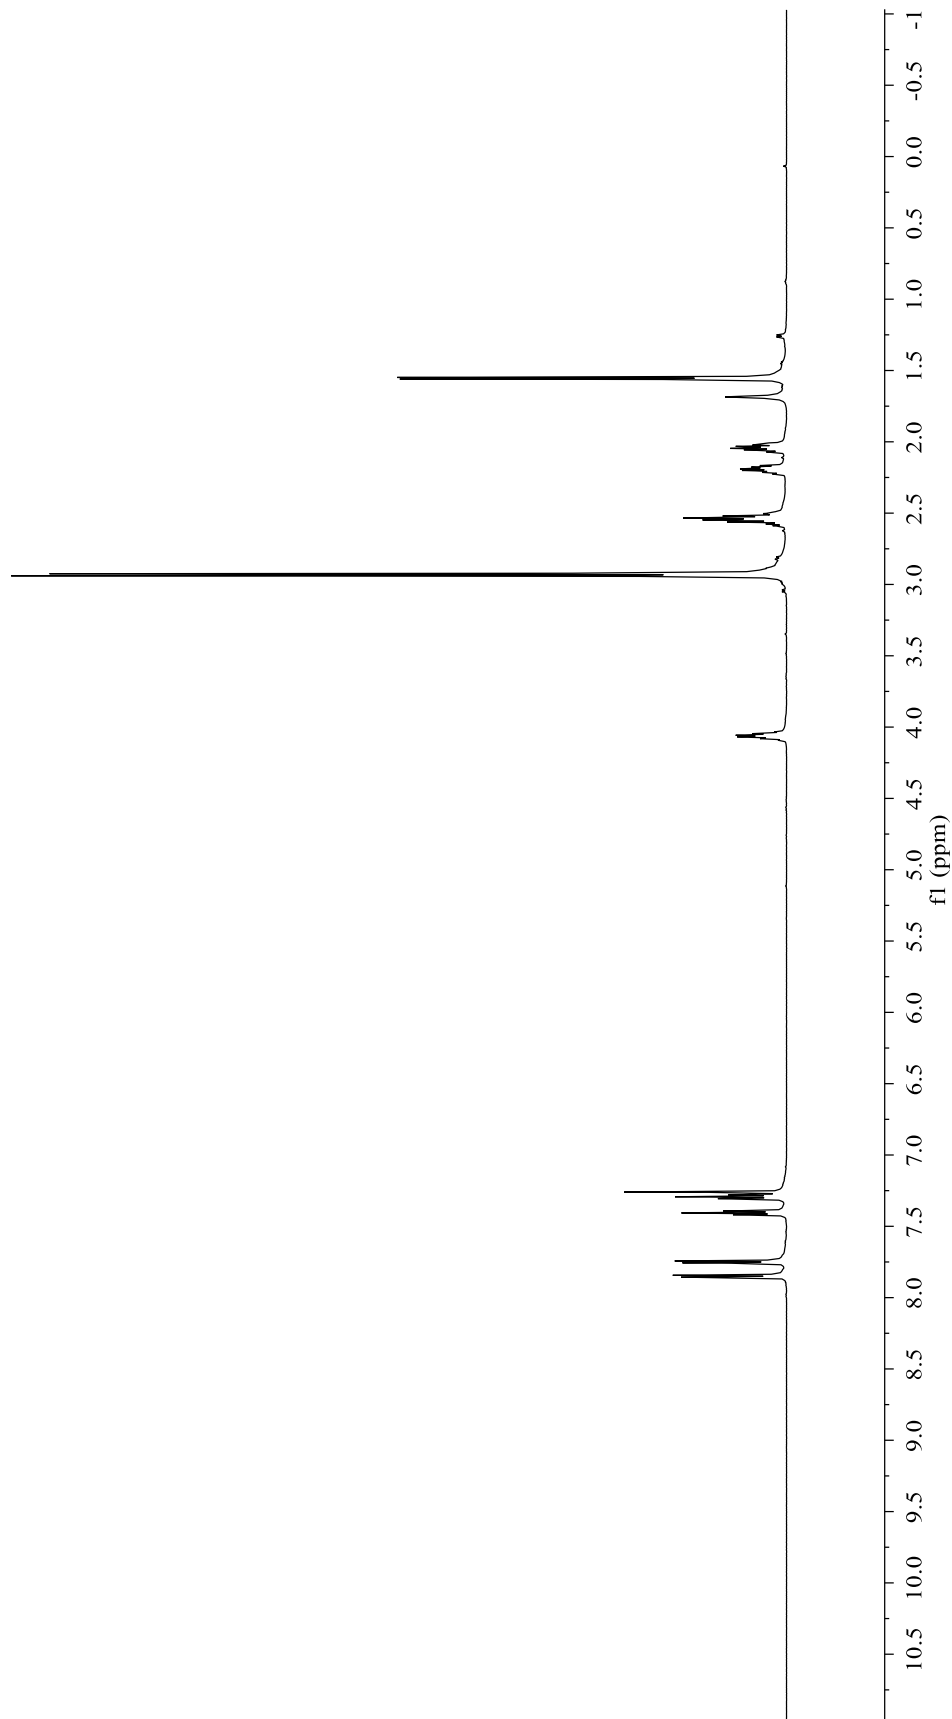

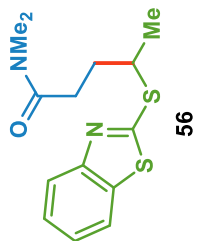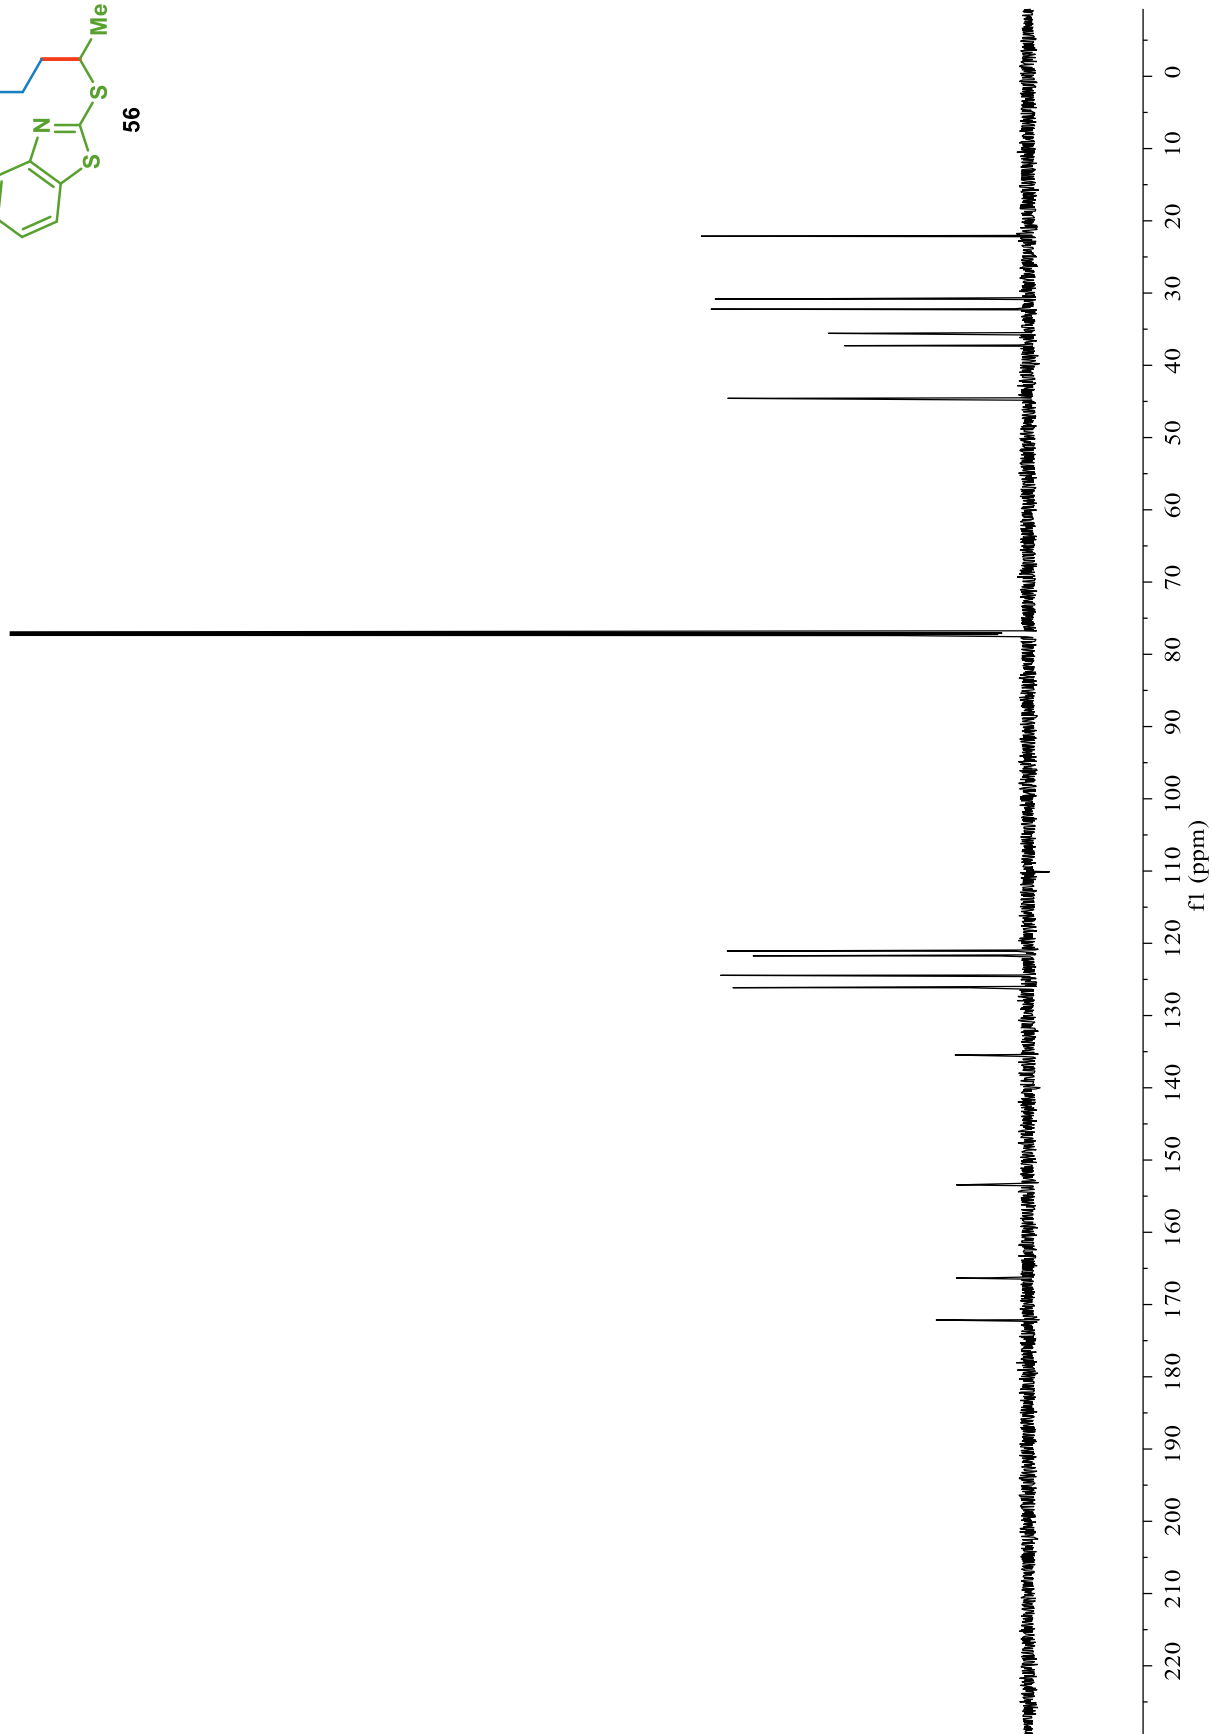

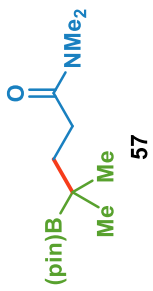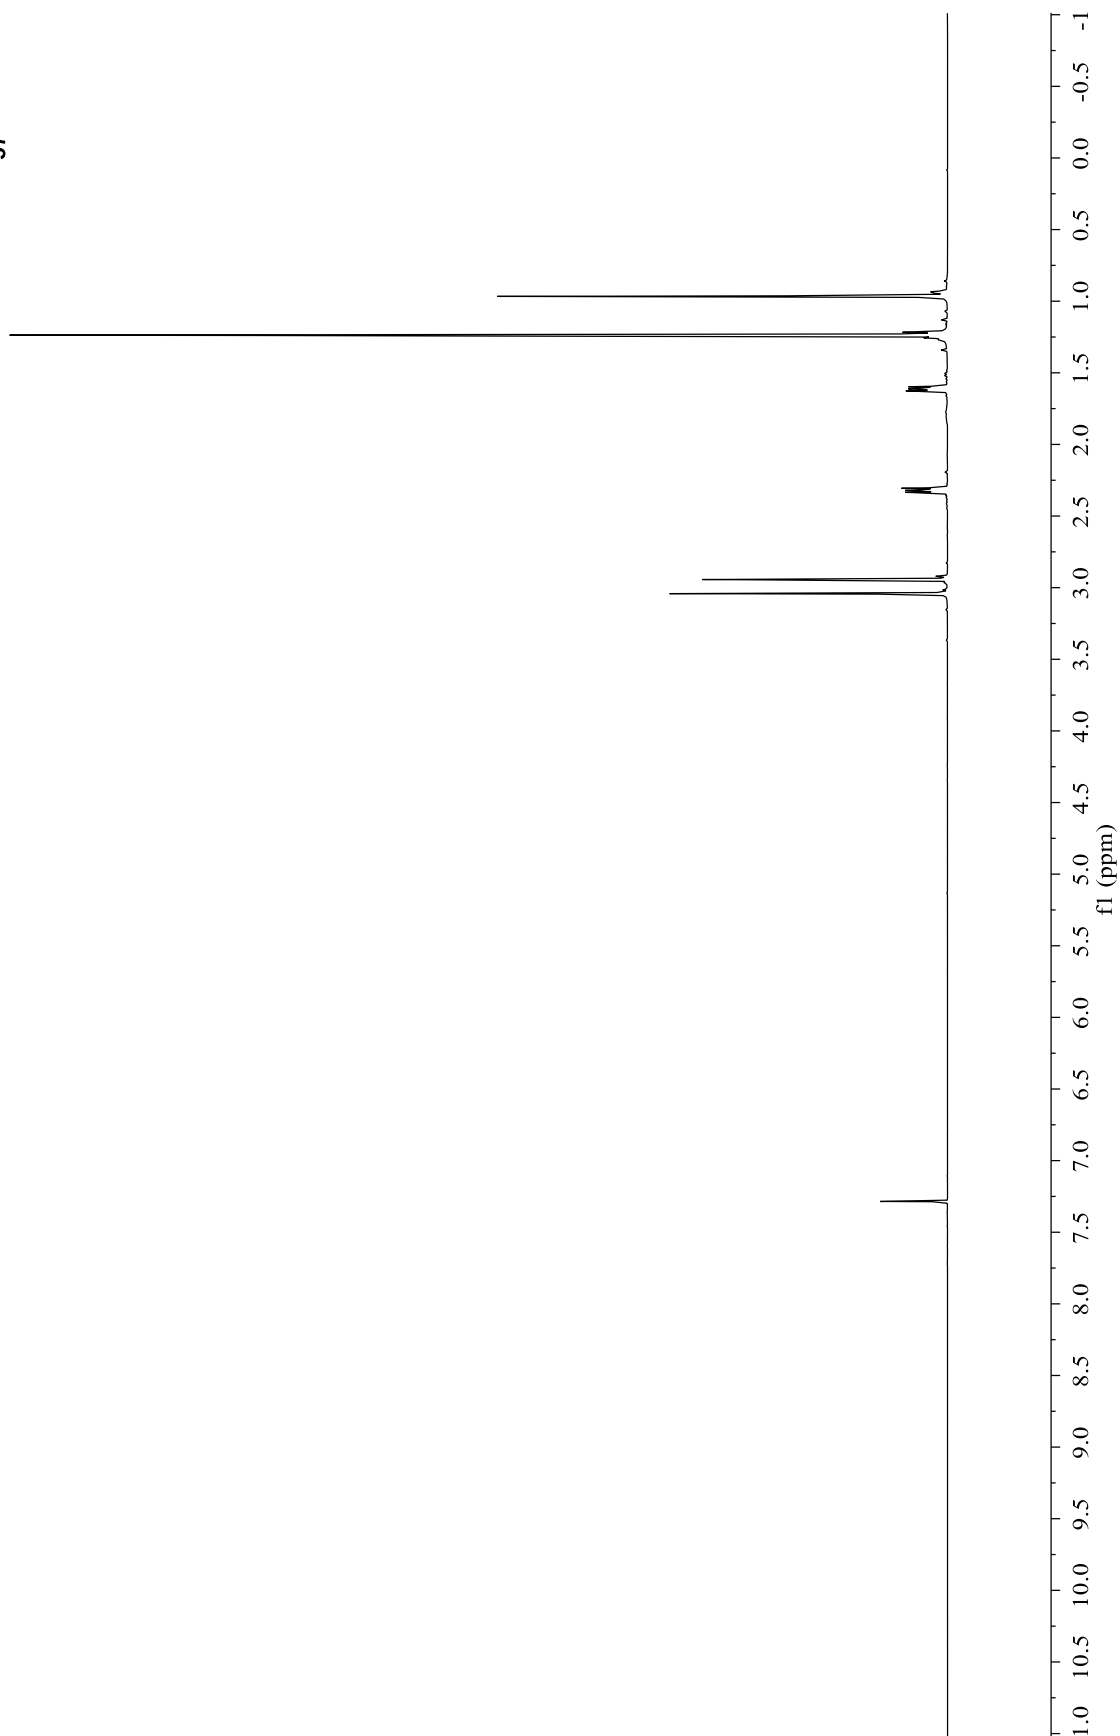

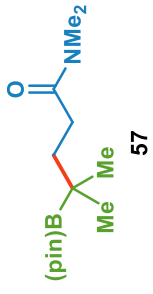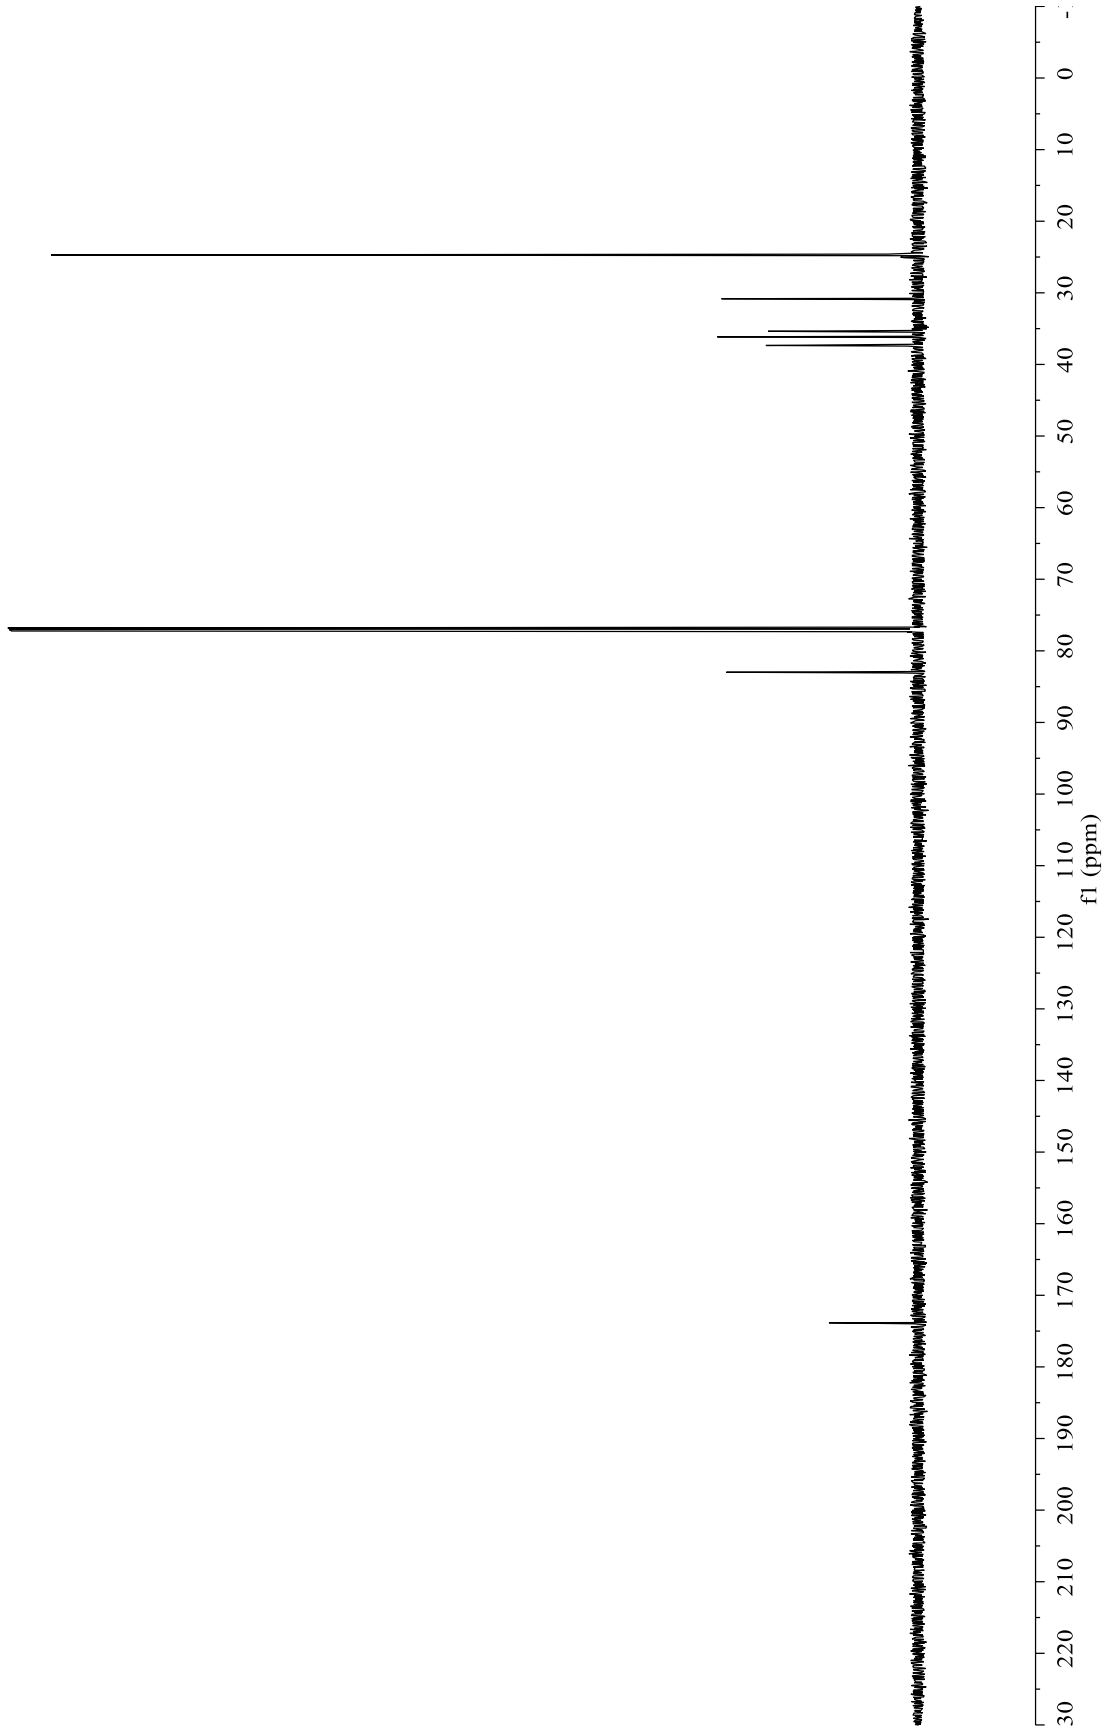

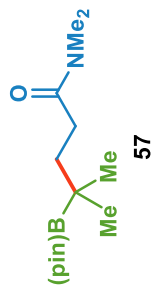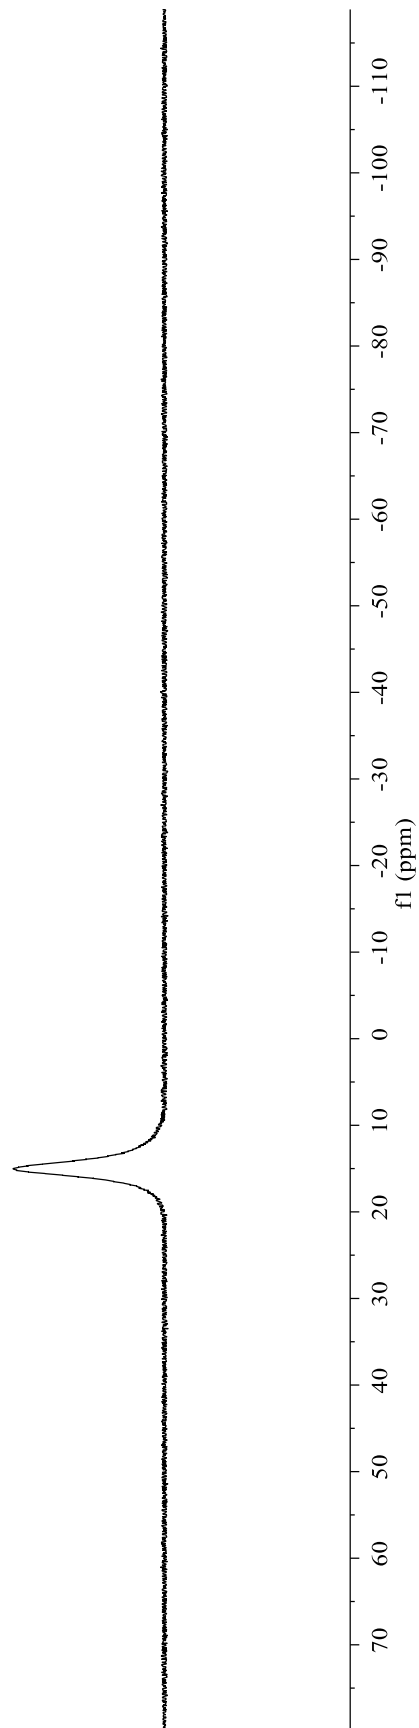

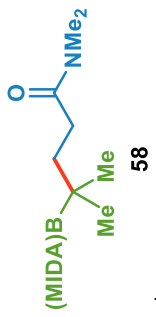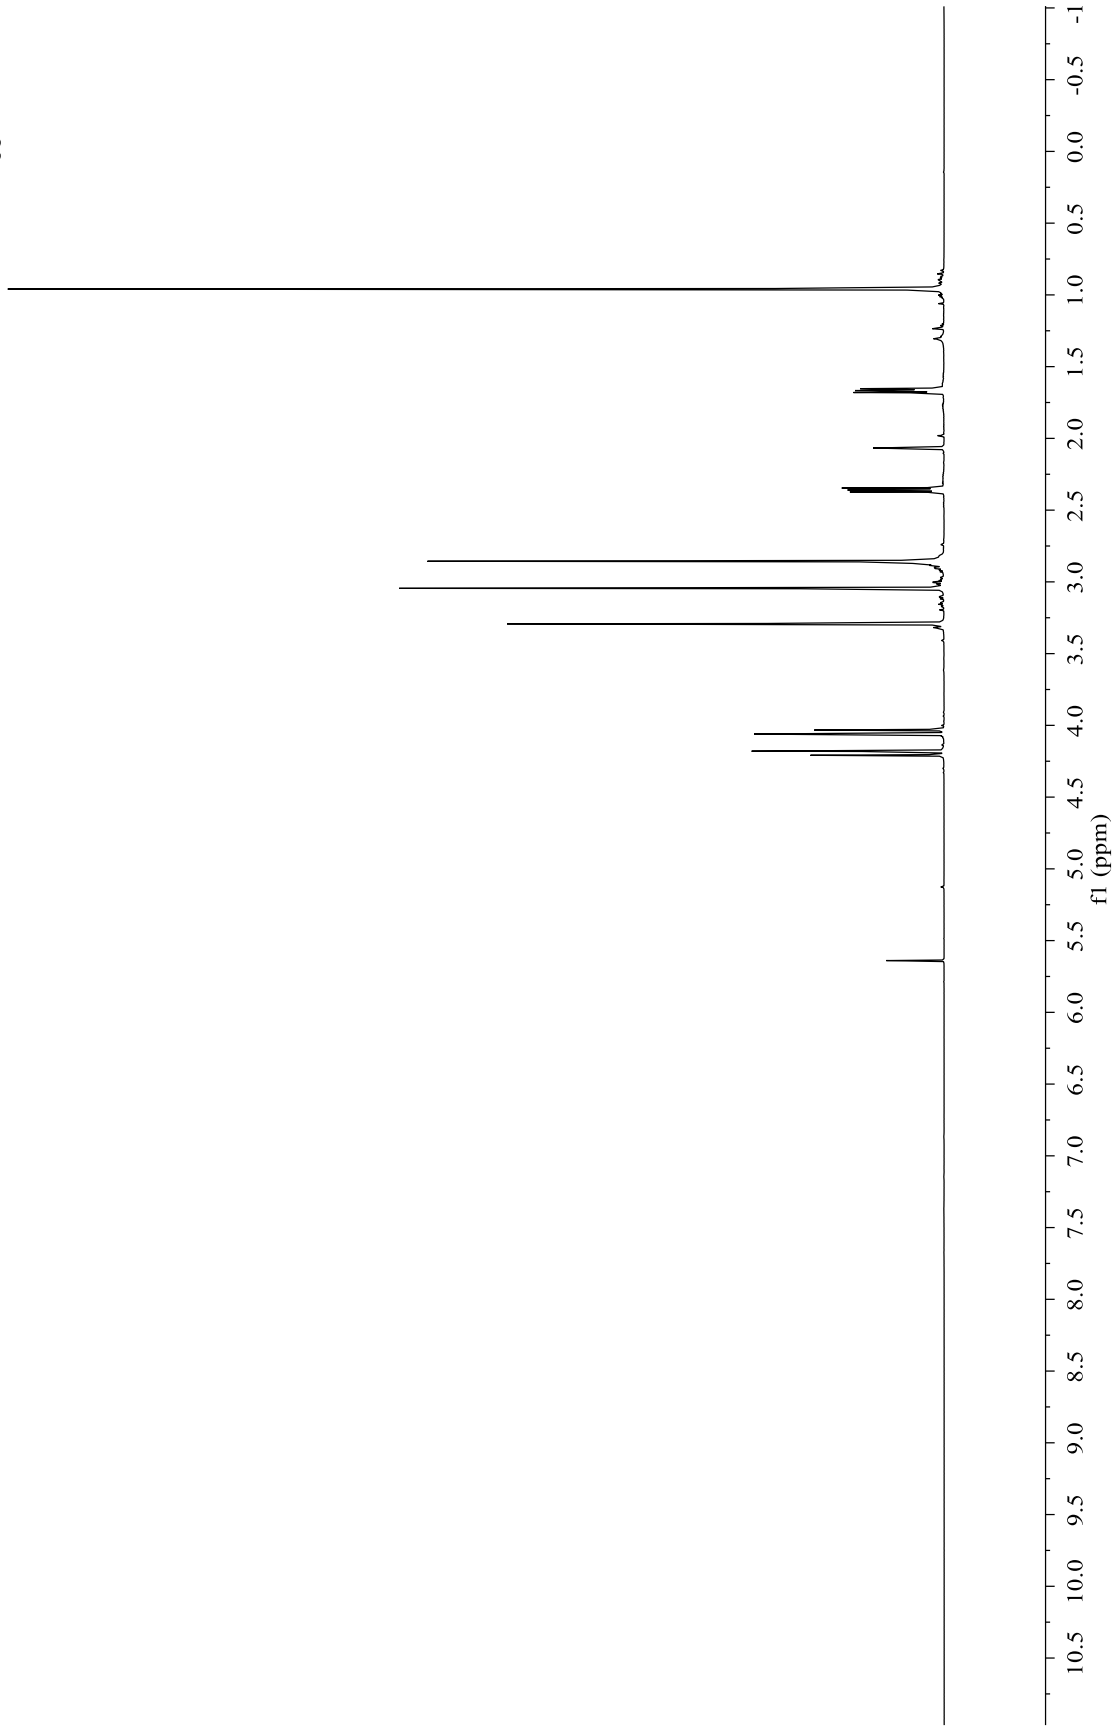

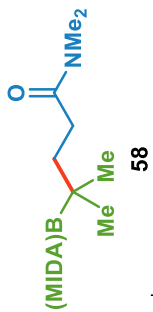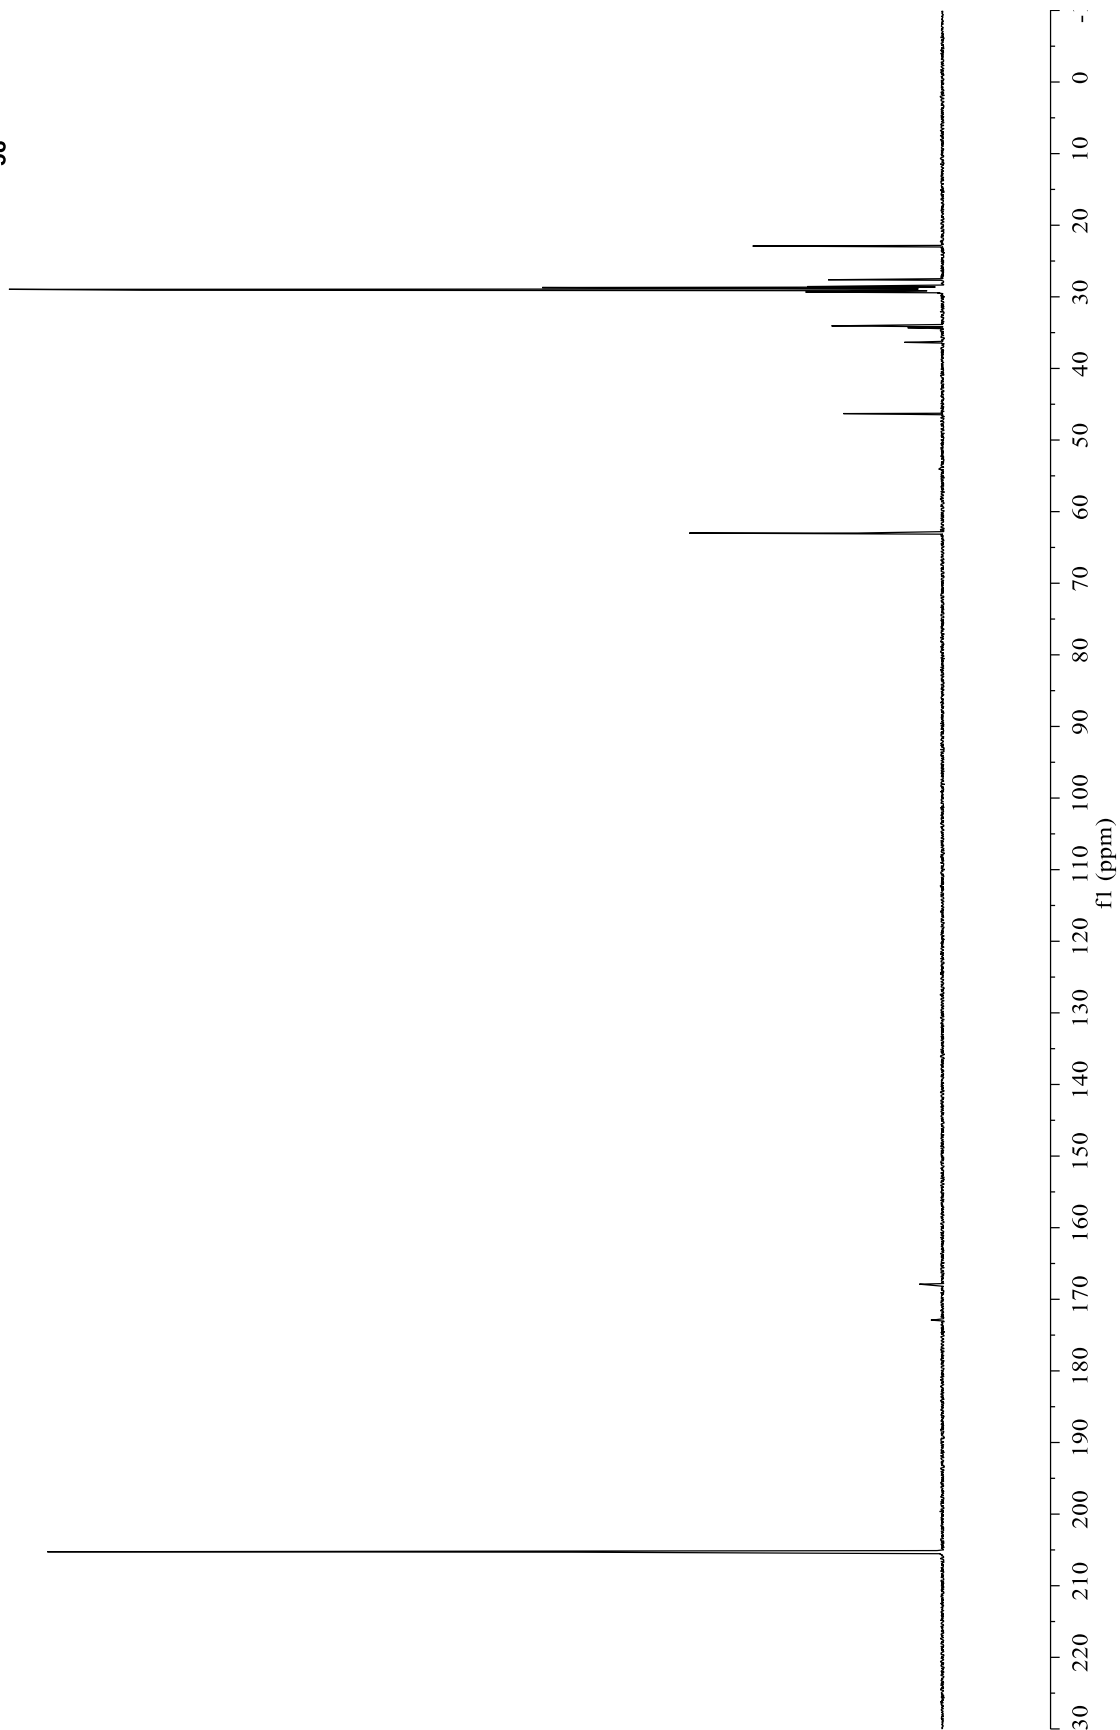

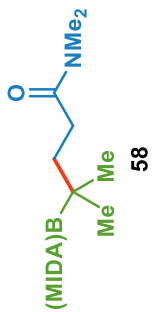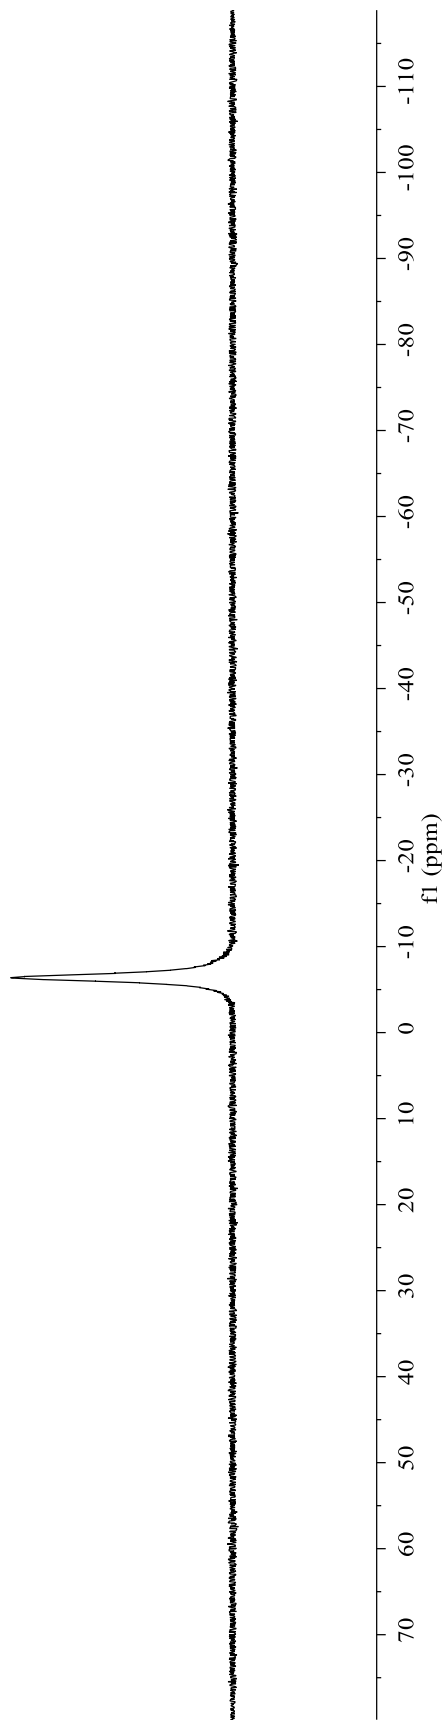



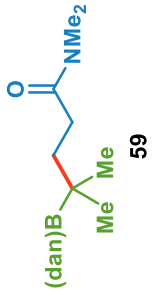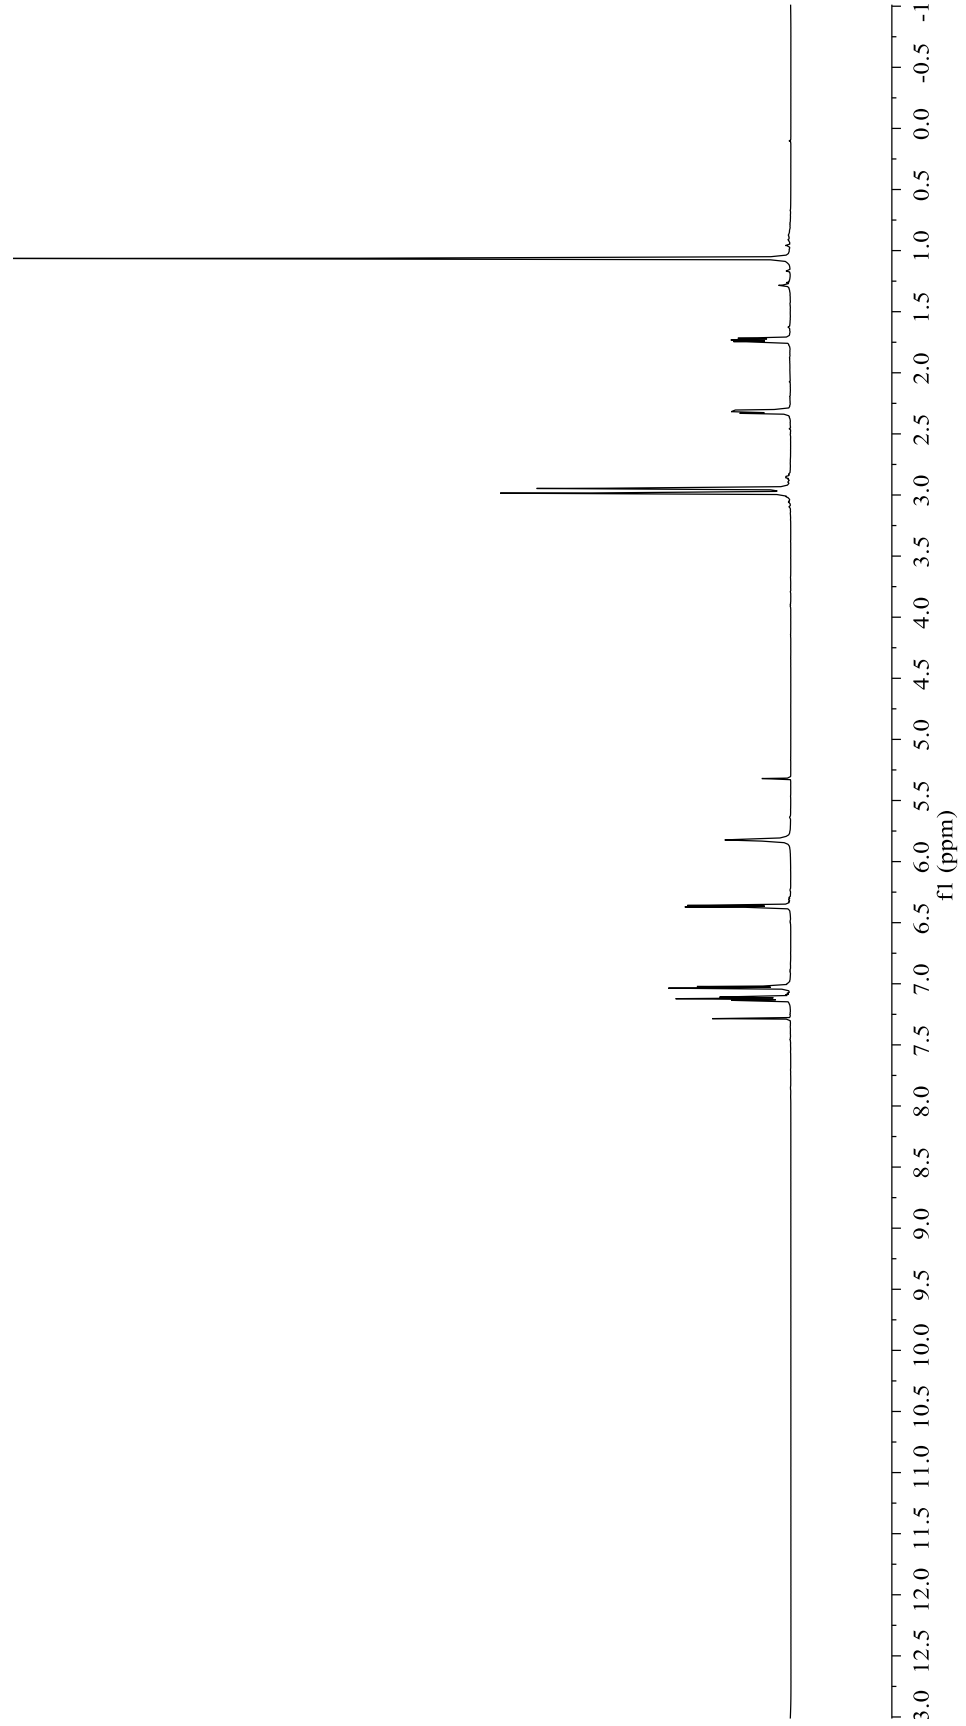

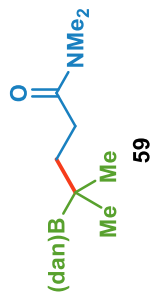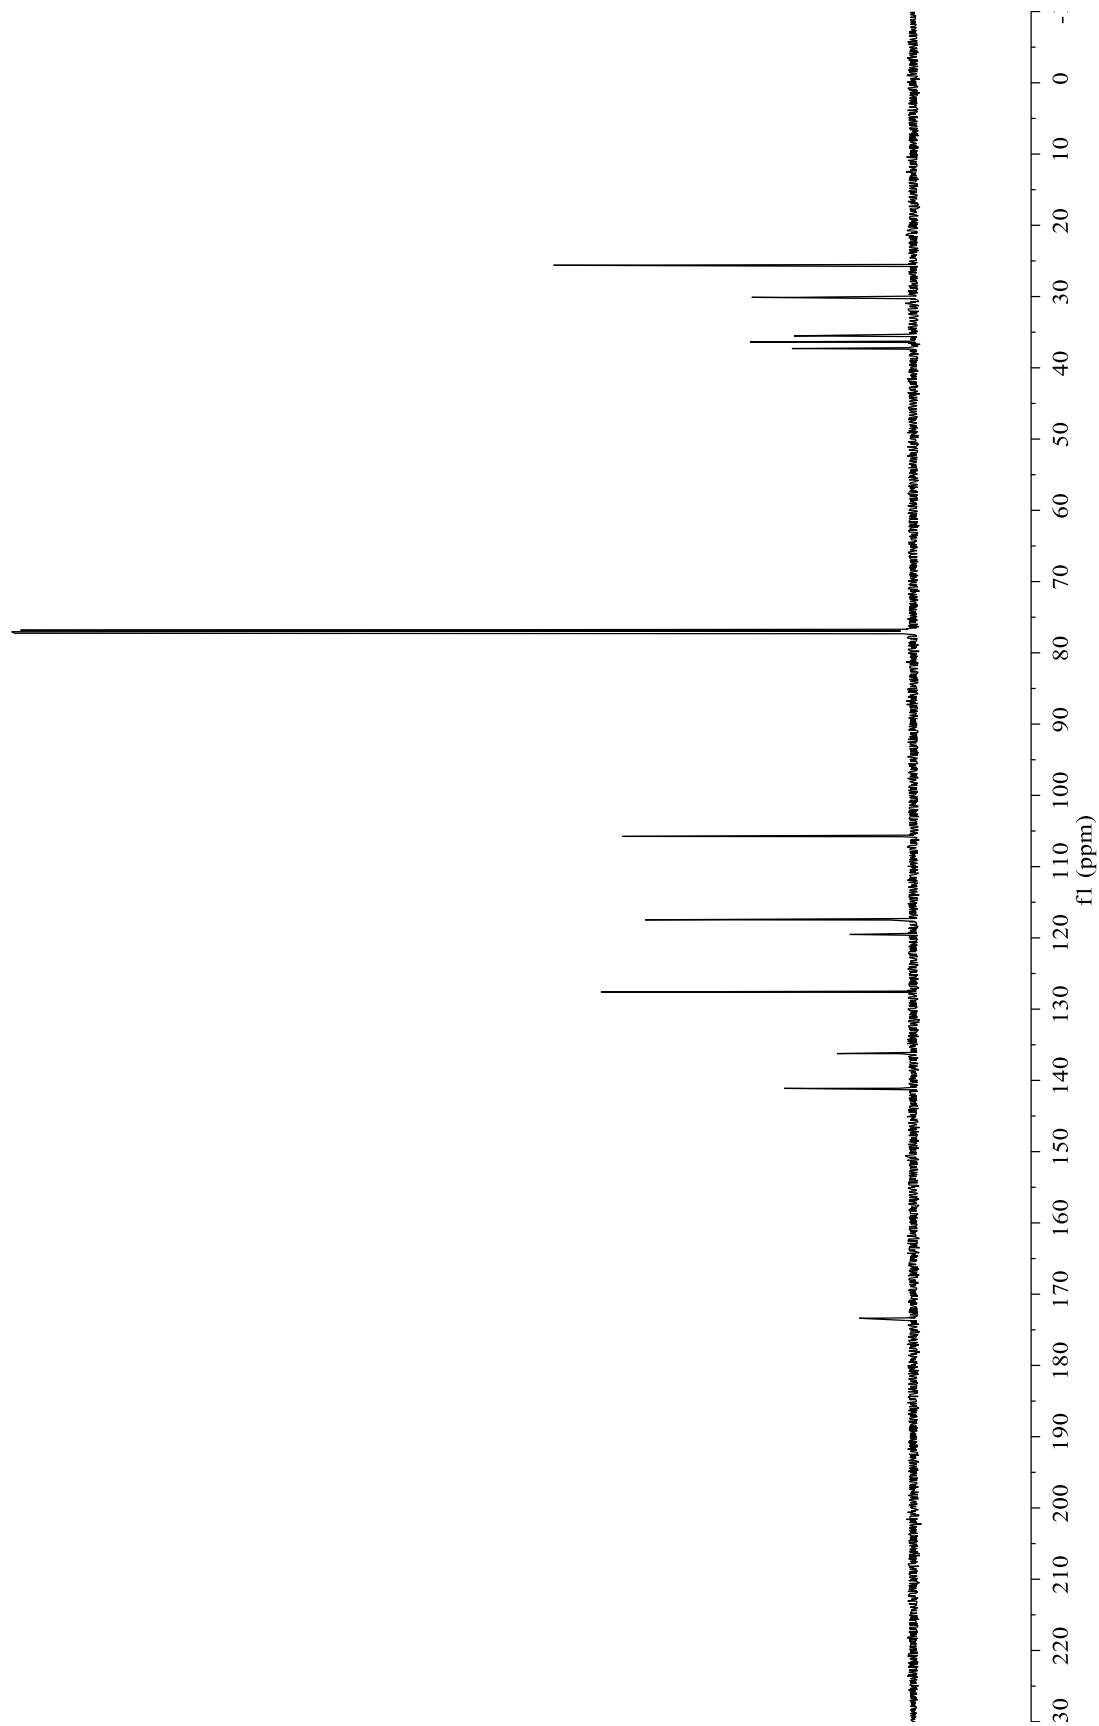

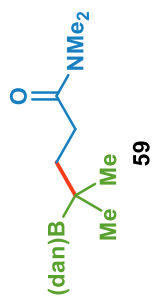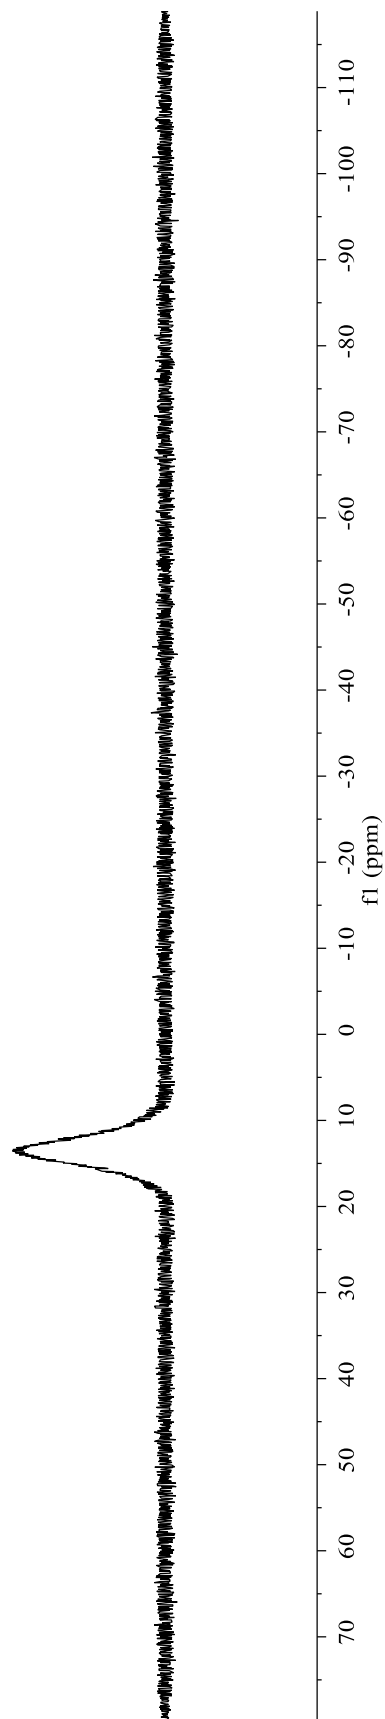

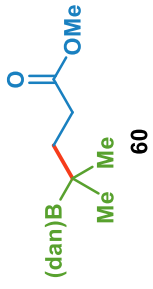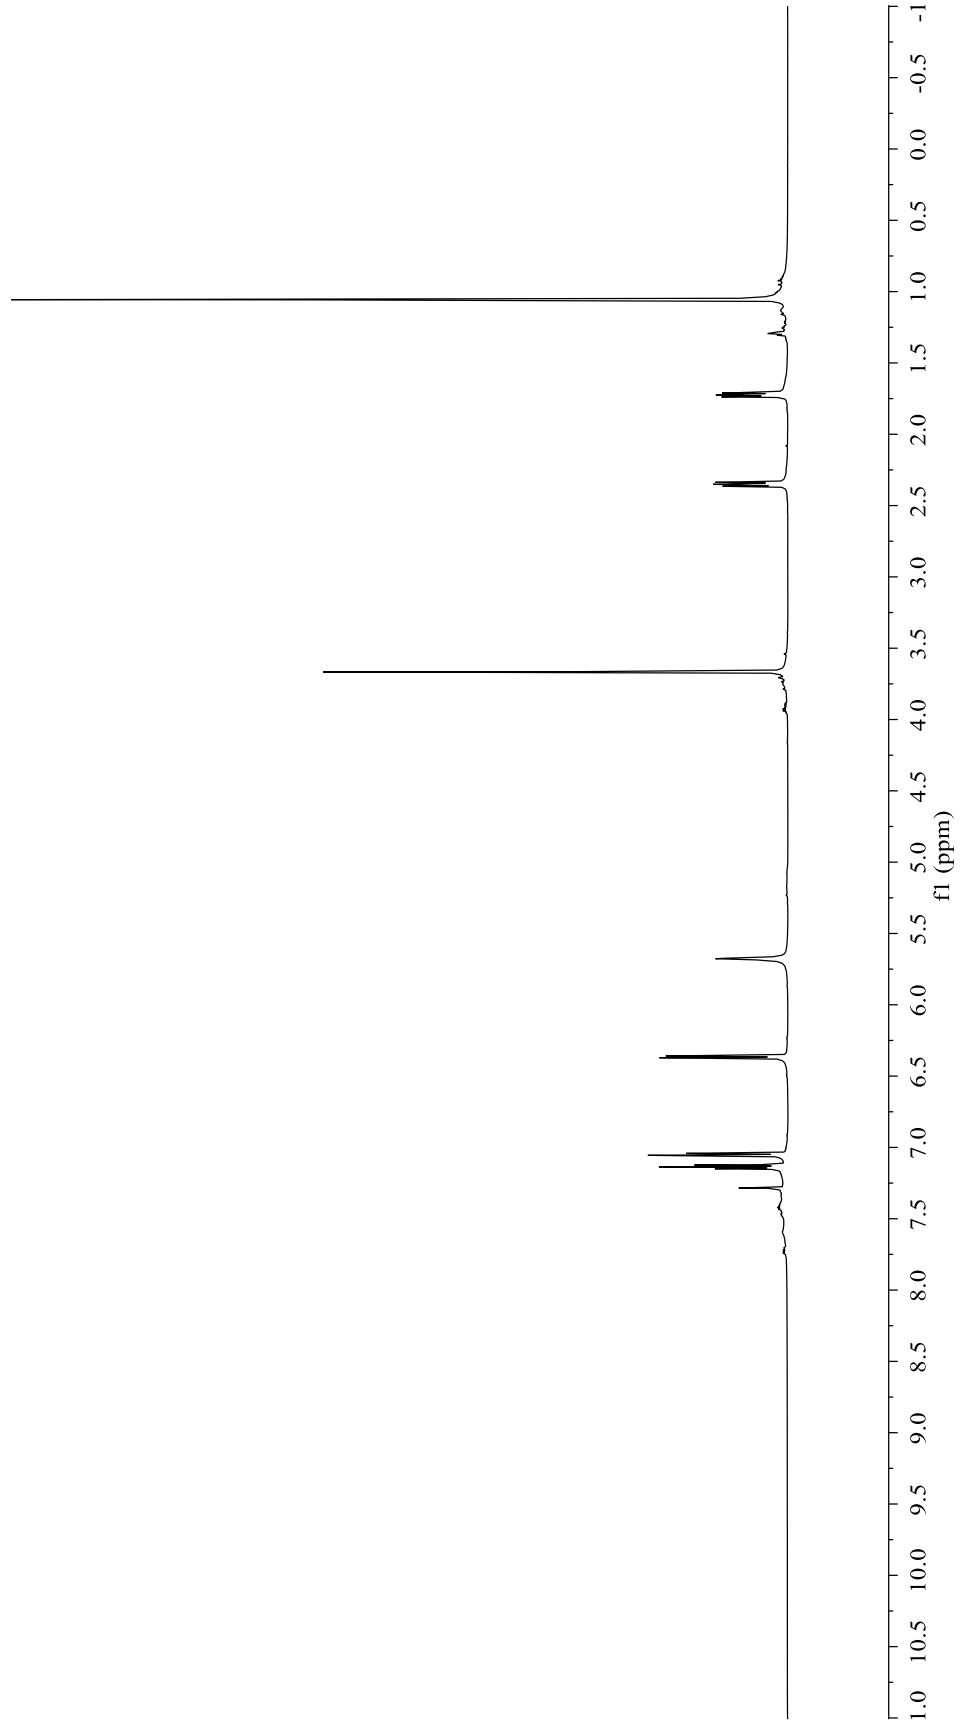

S161

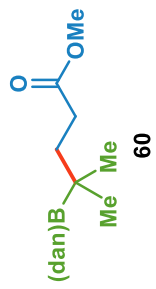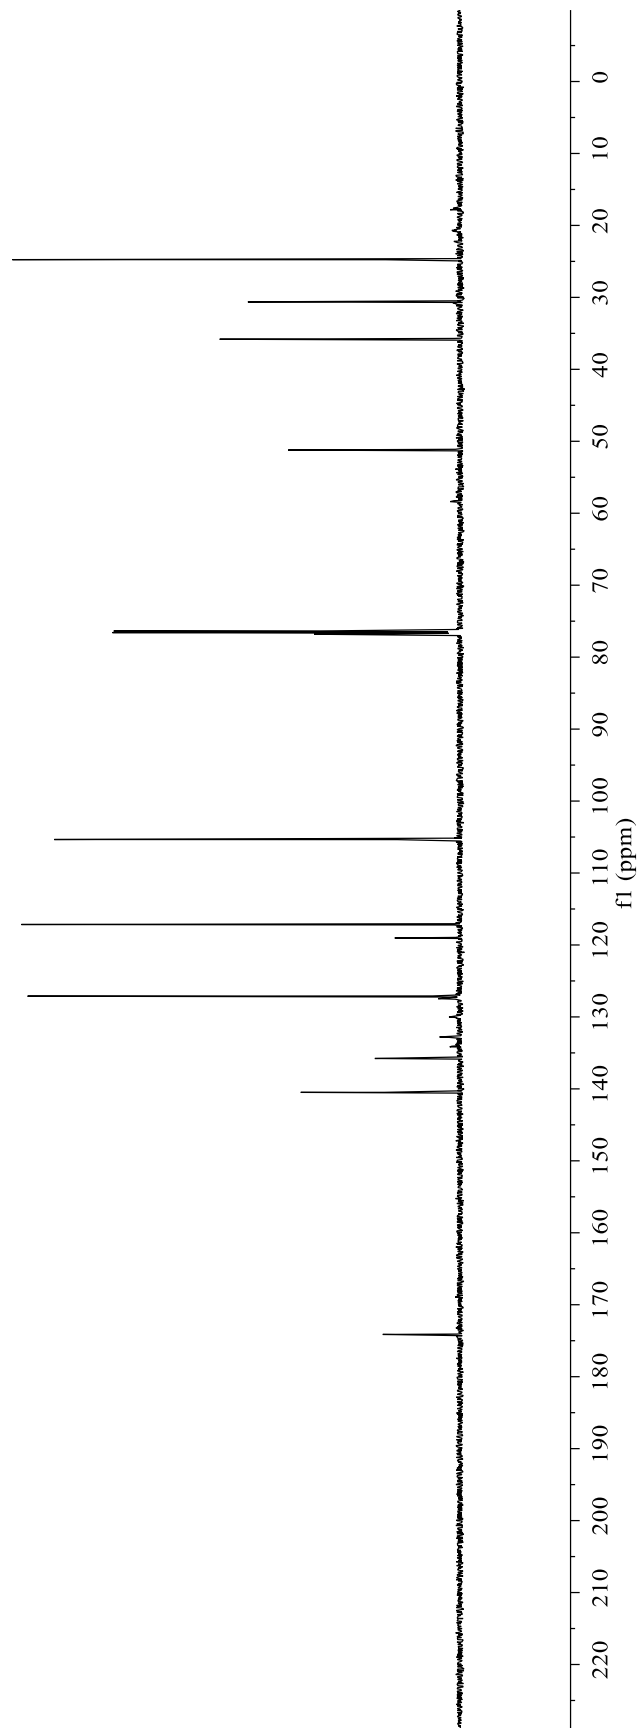

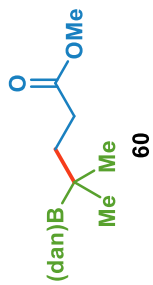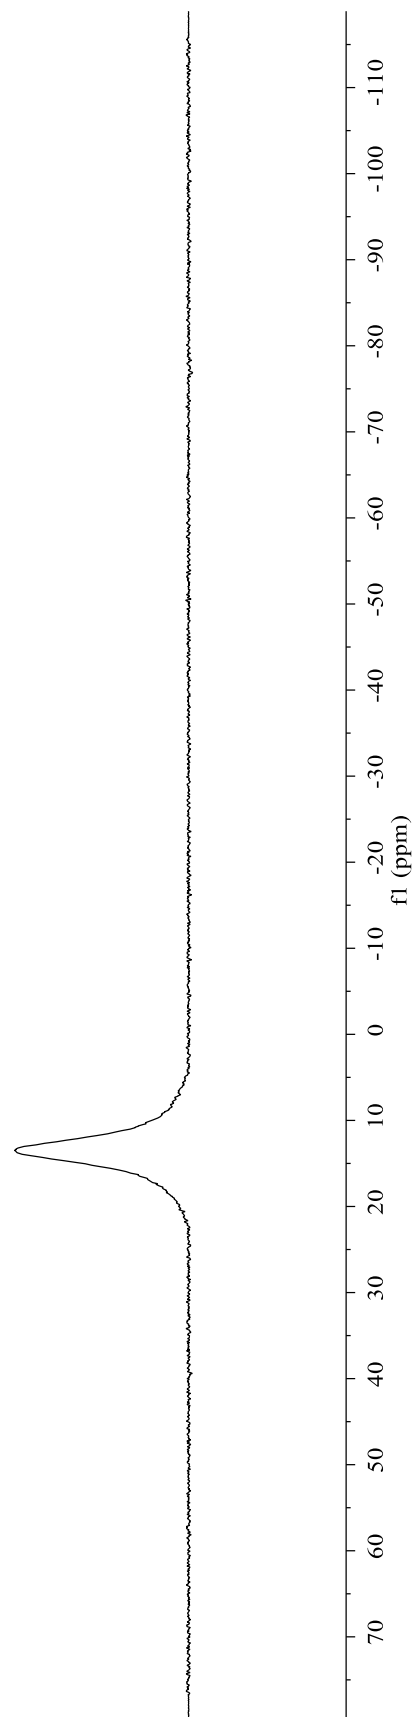



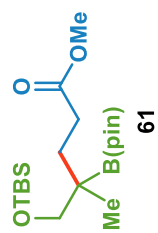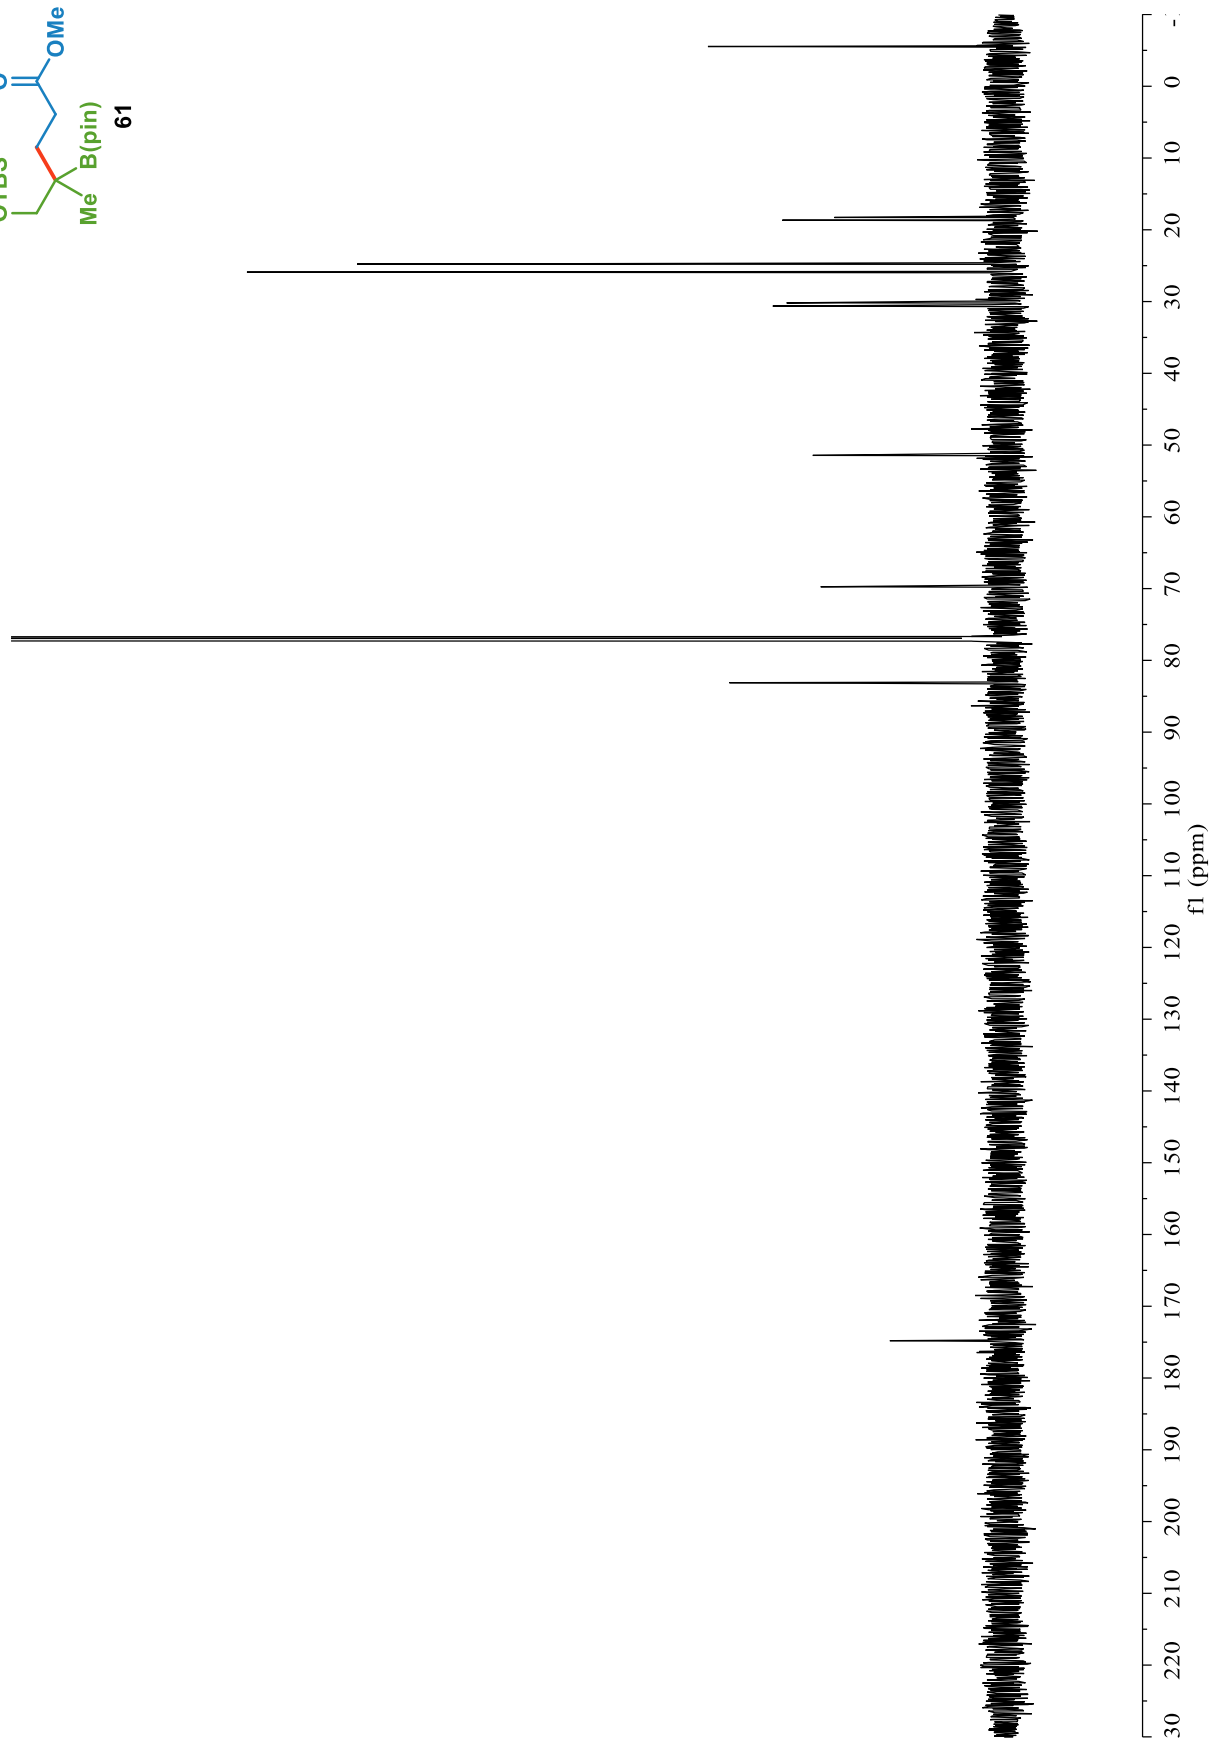



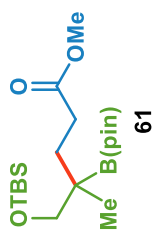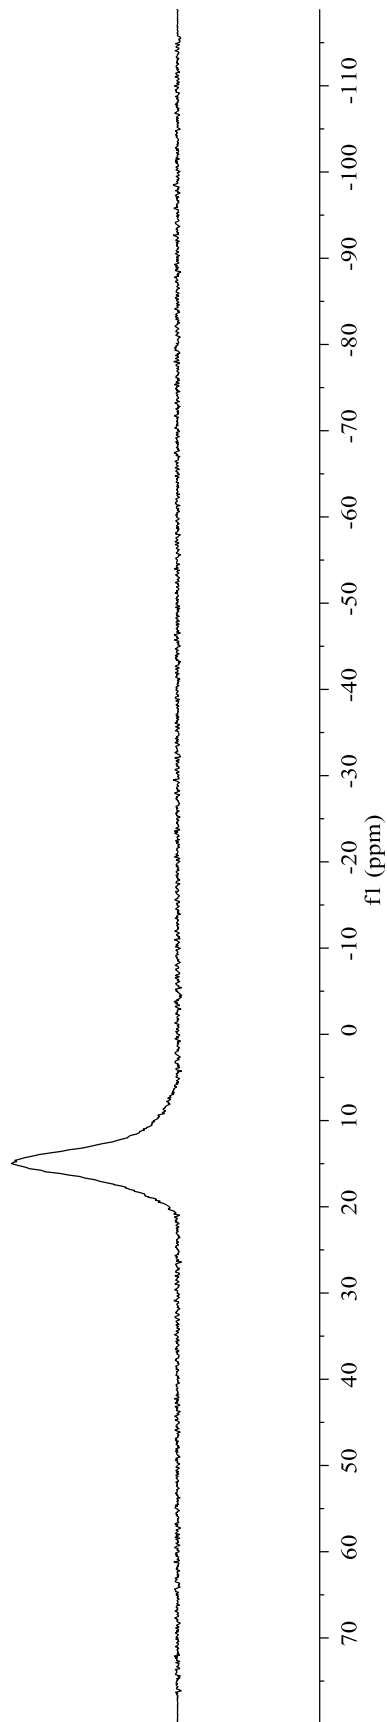

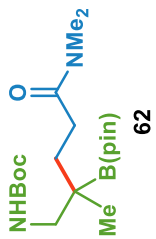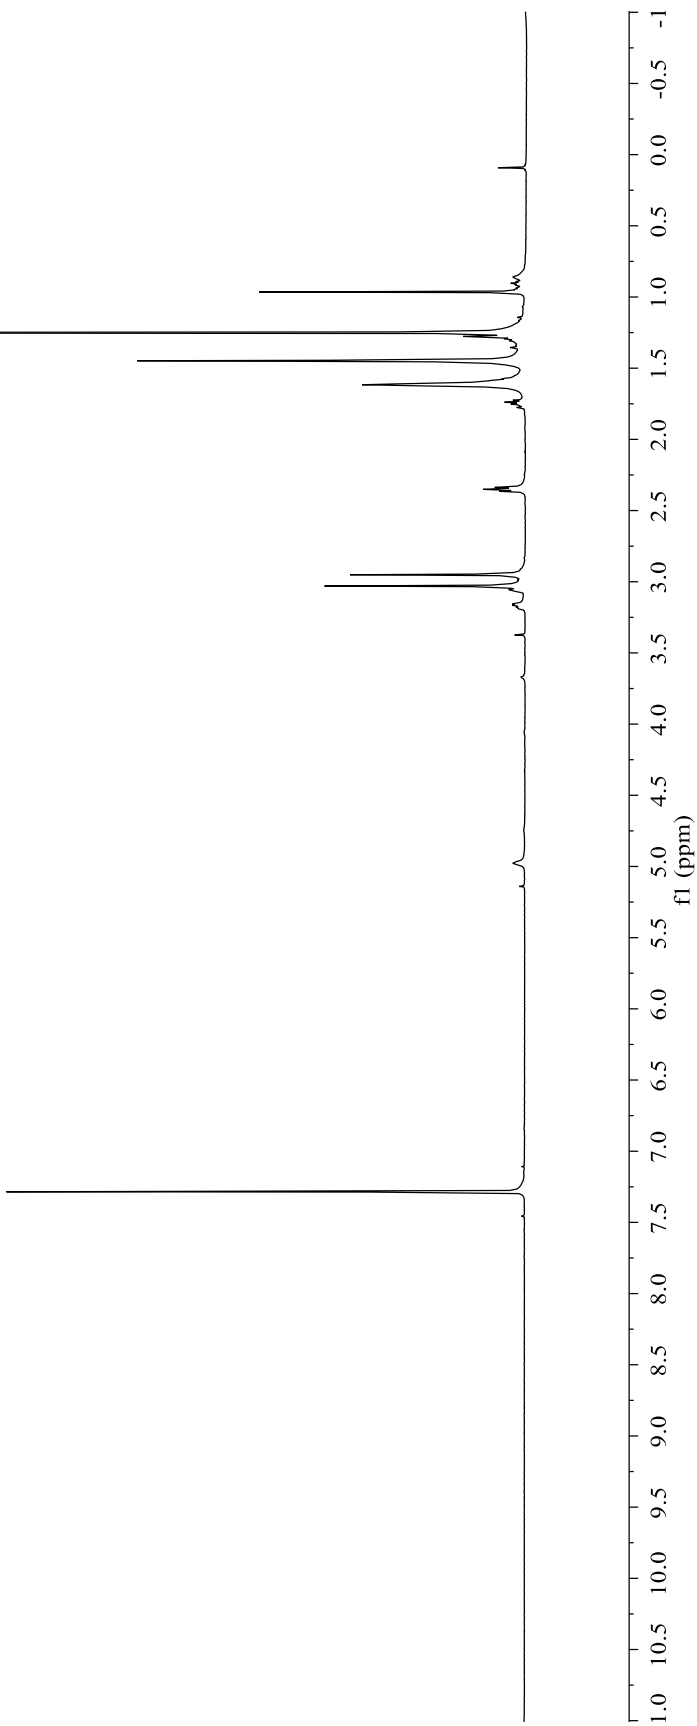

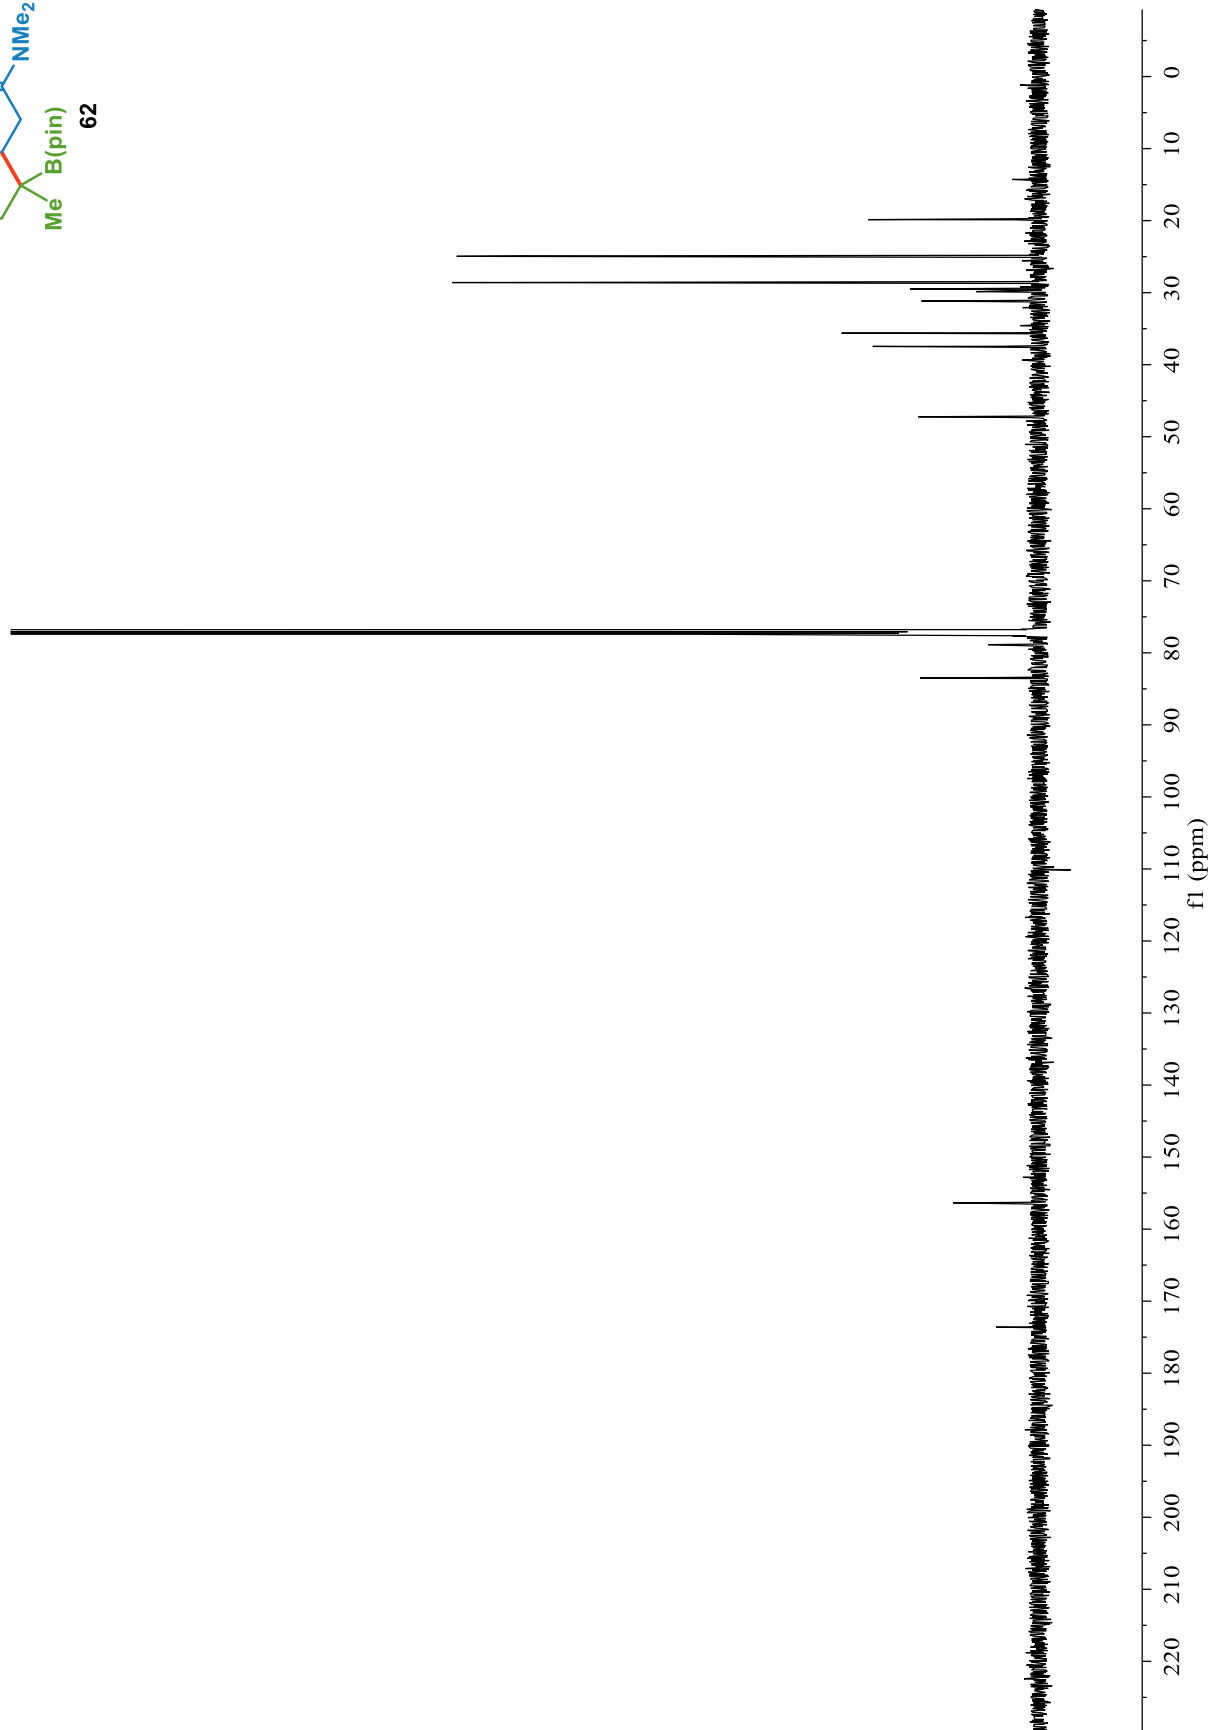

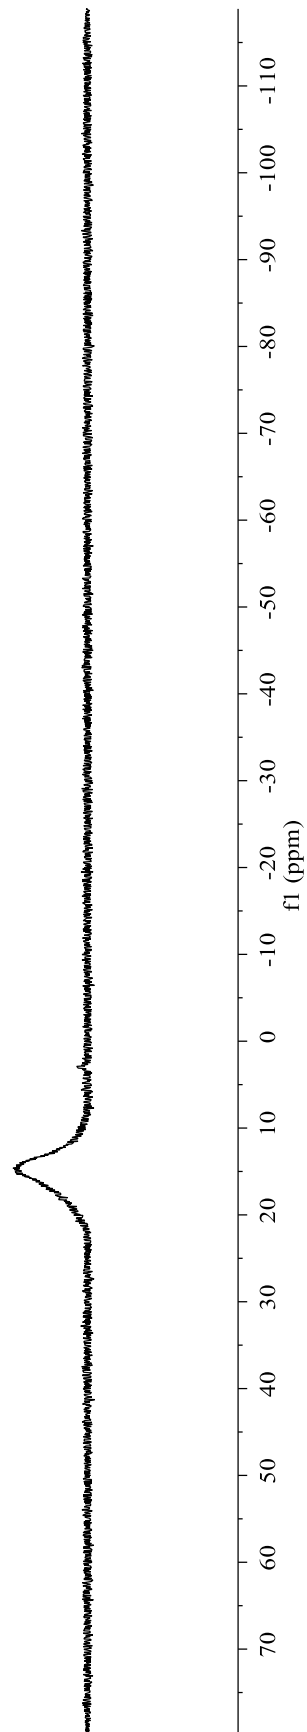

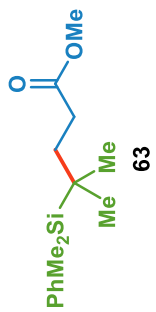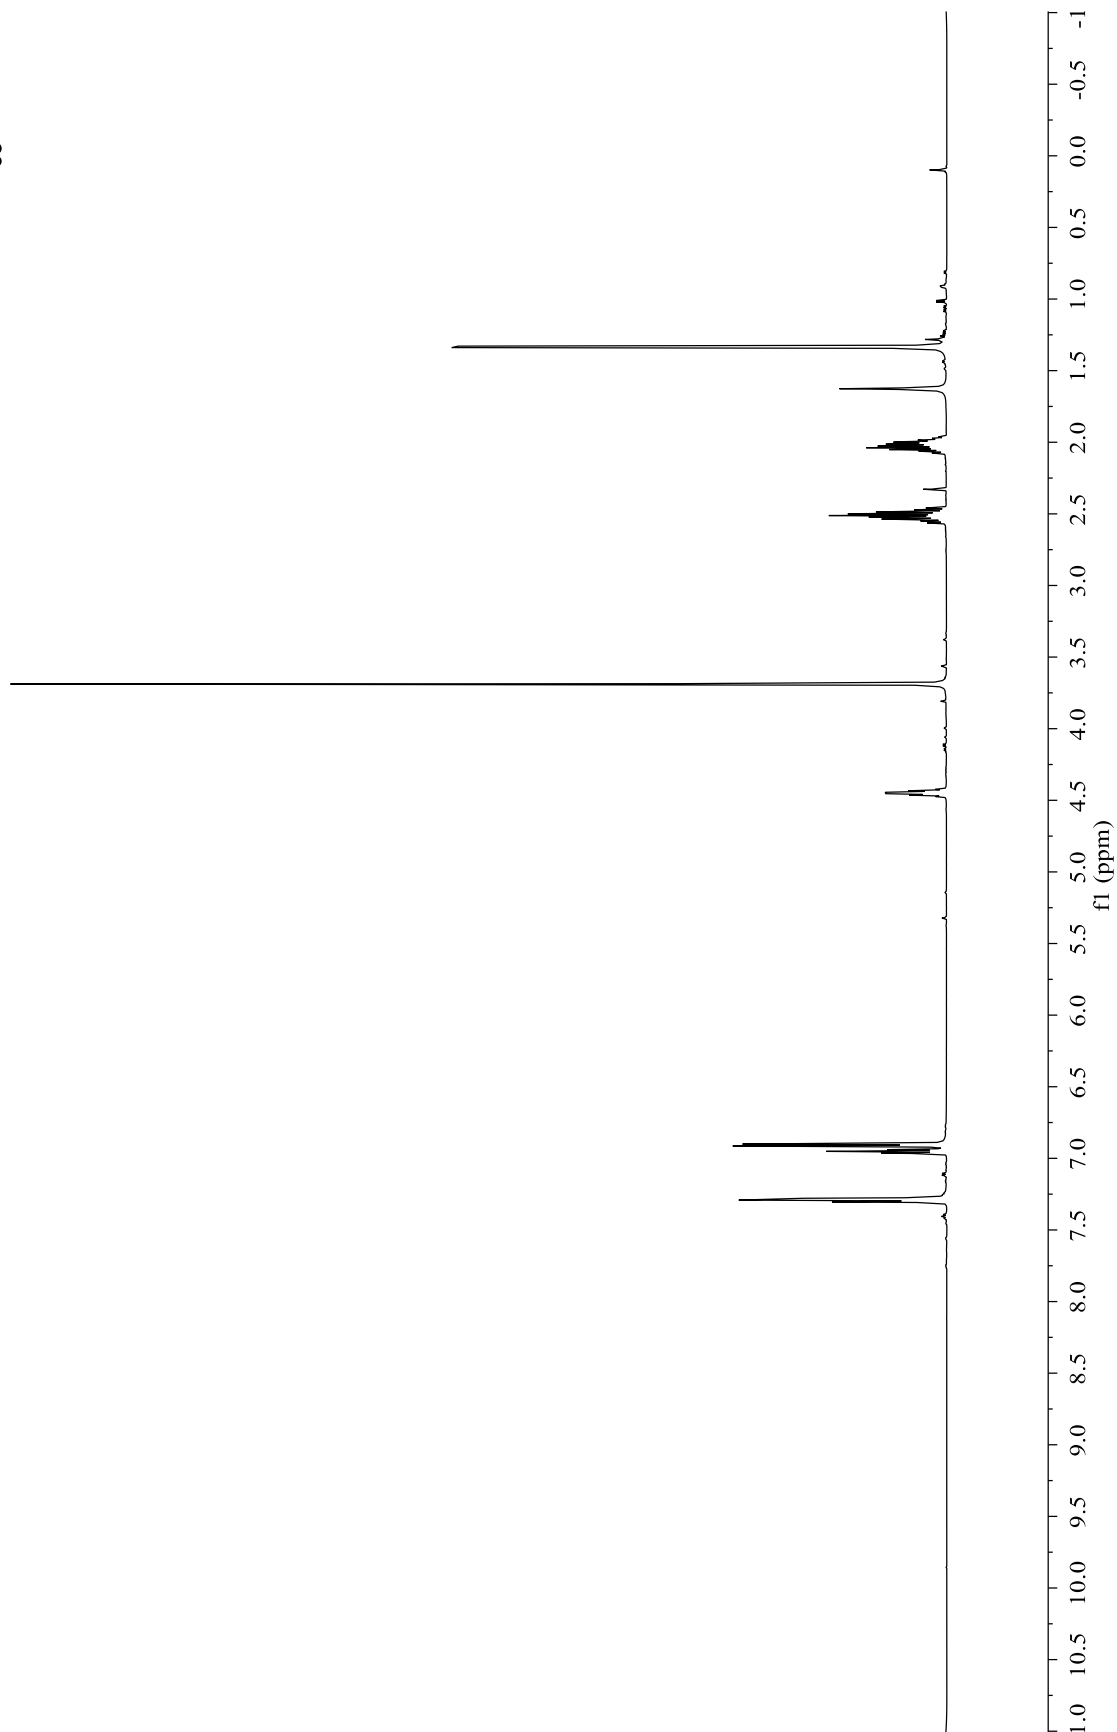

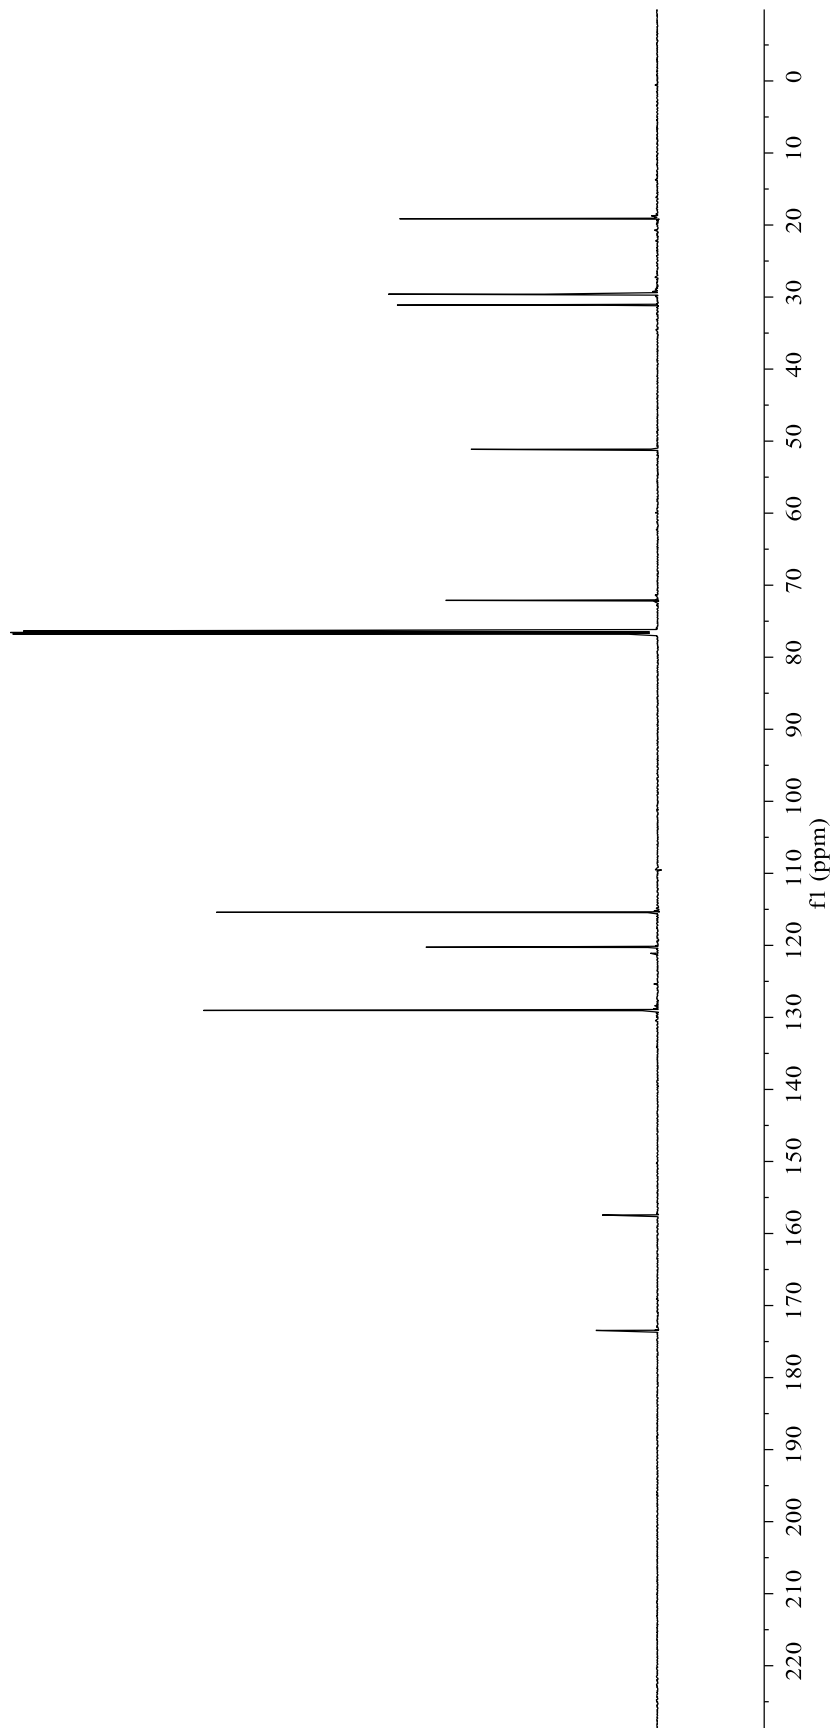

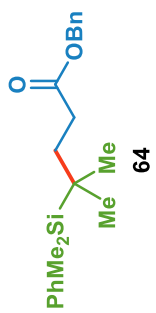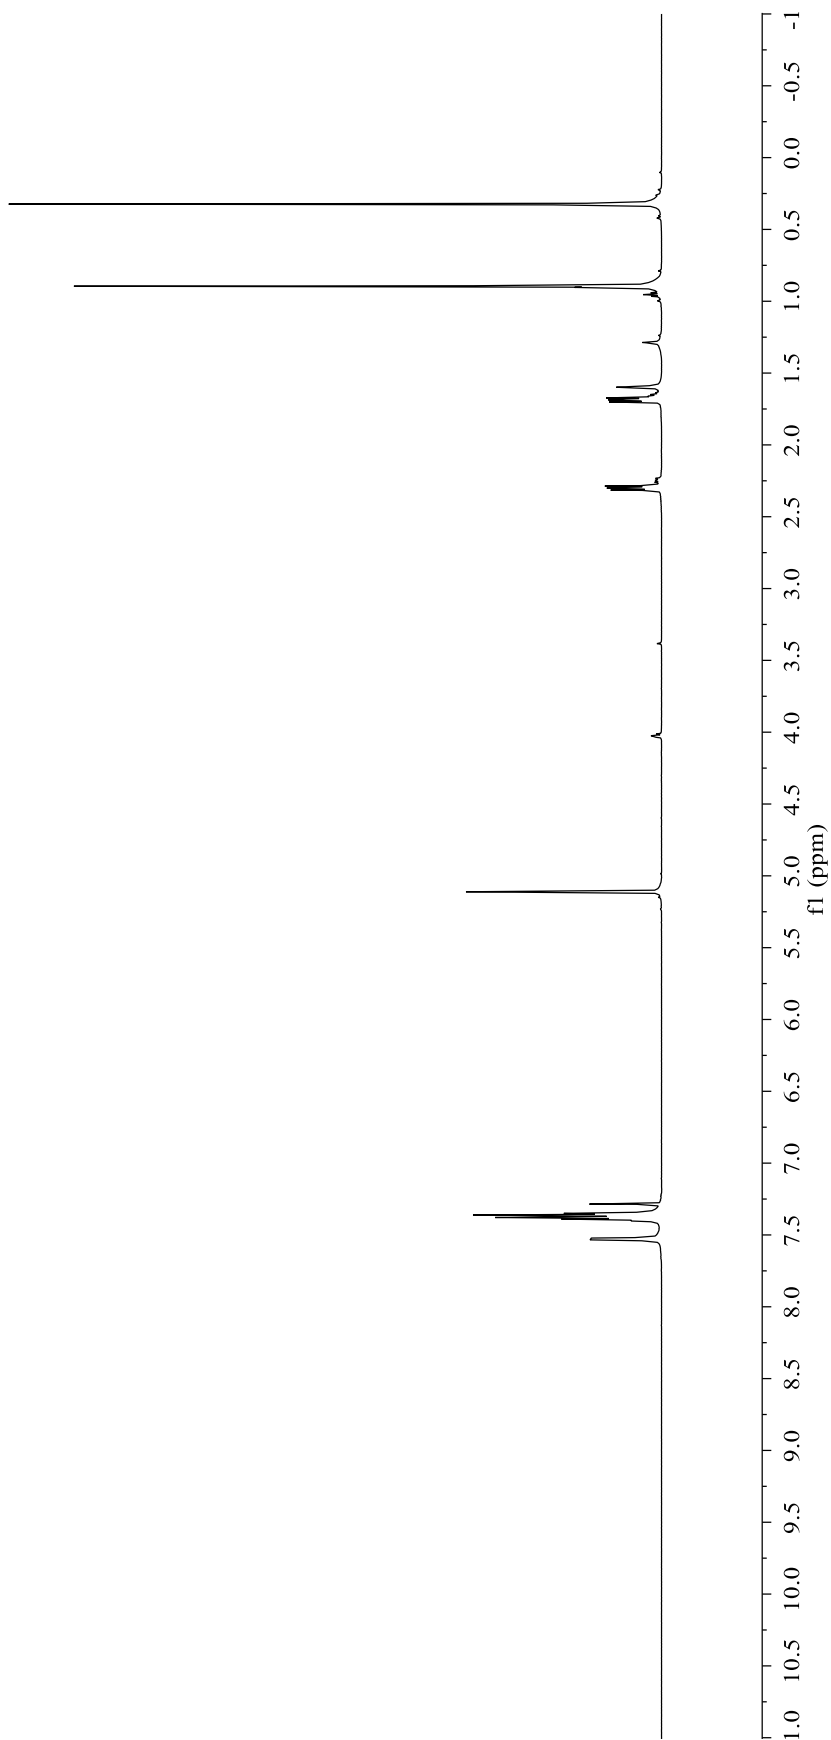

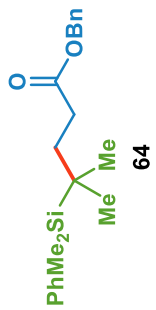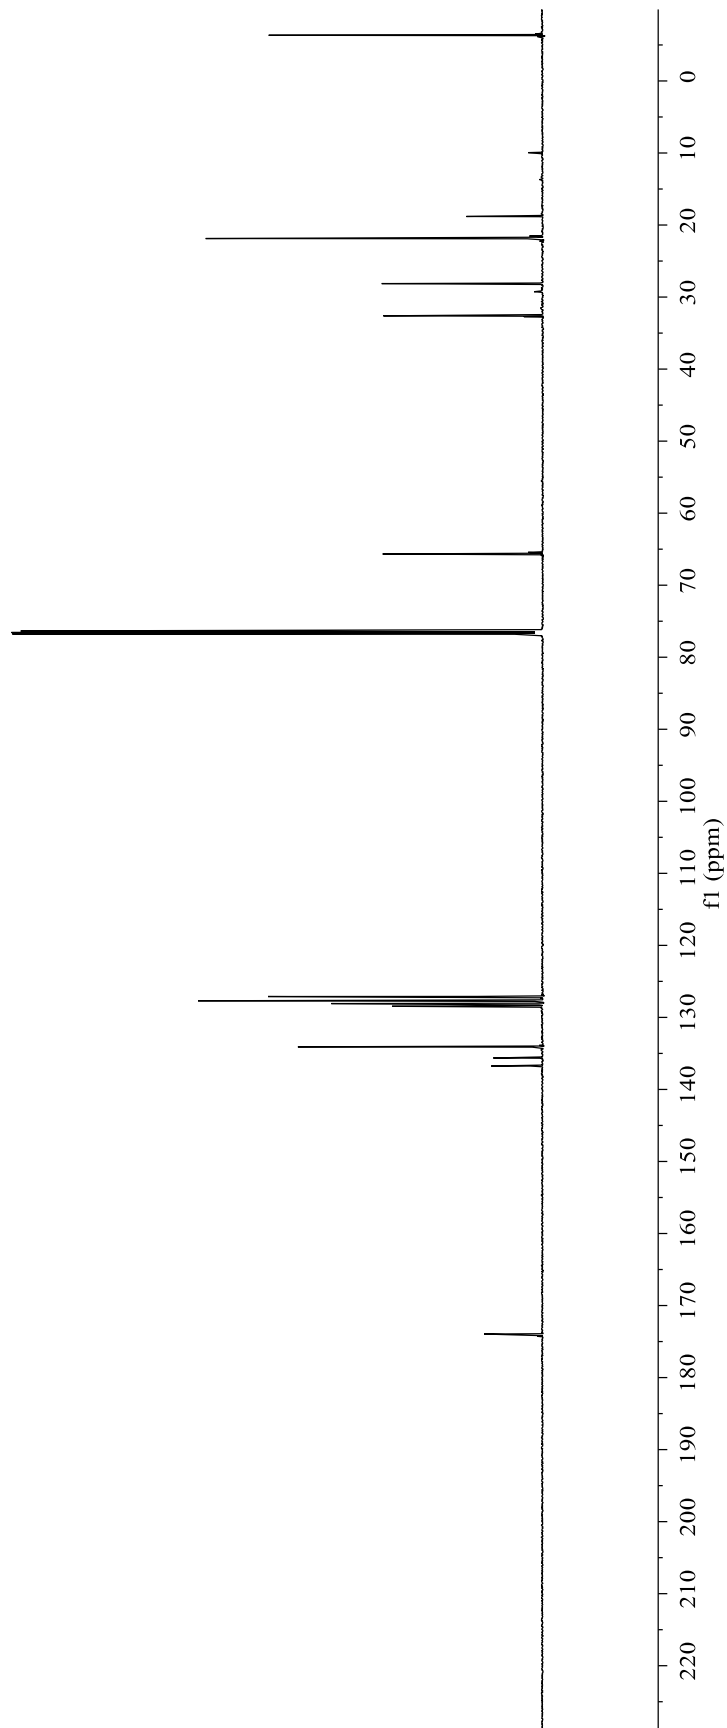



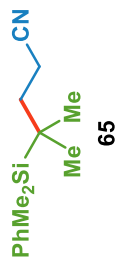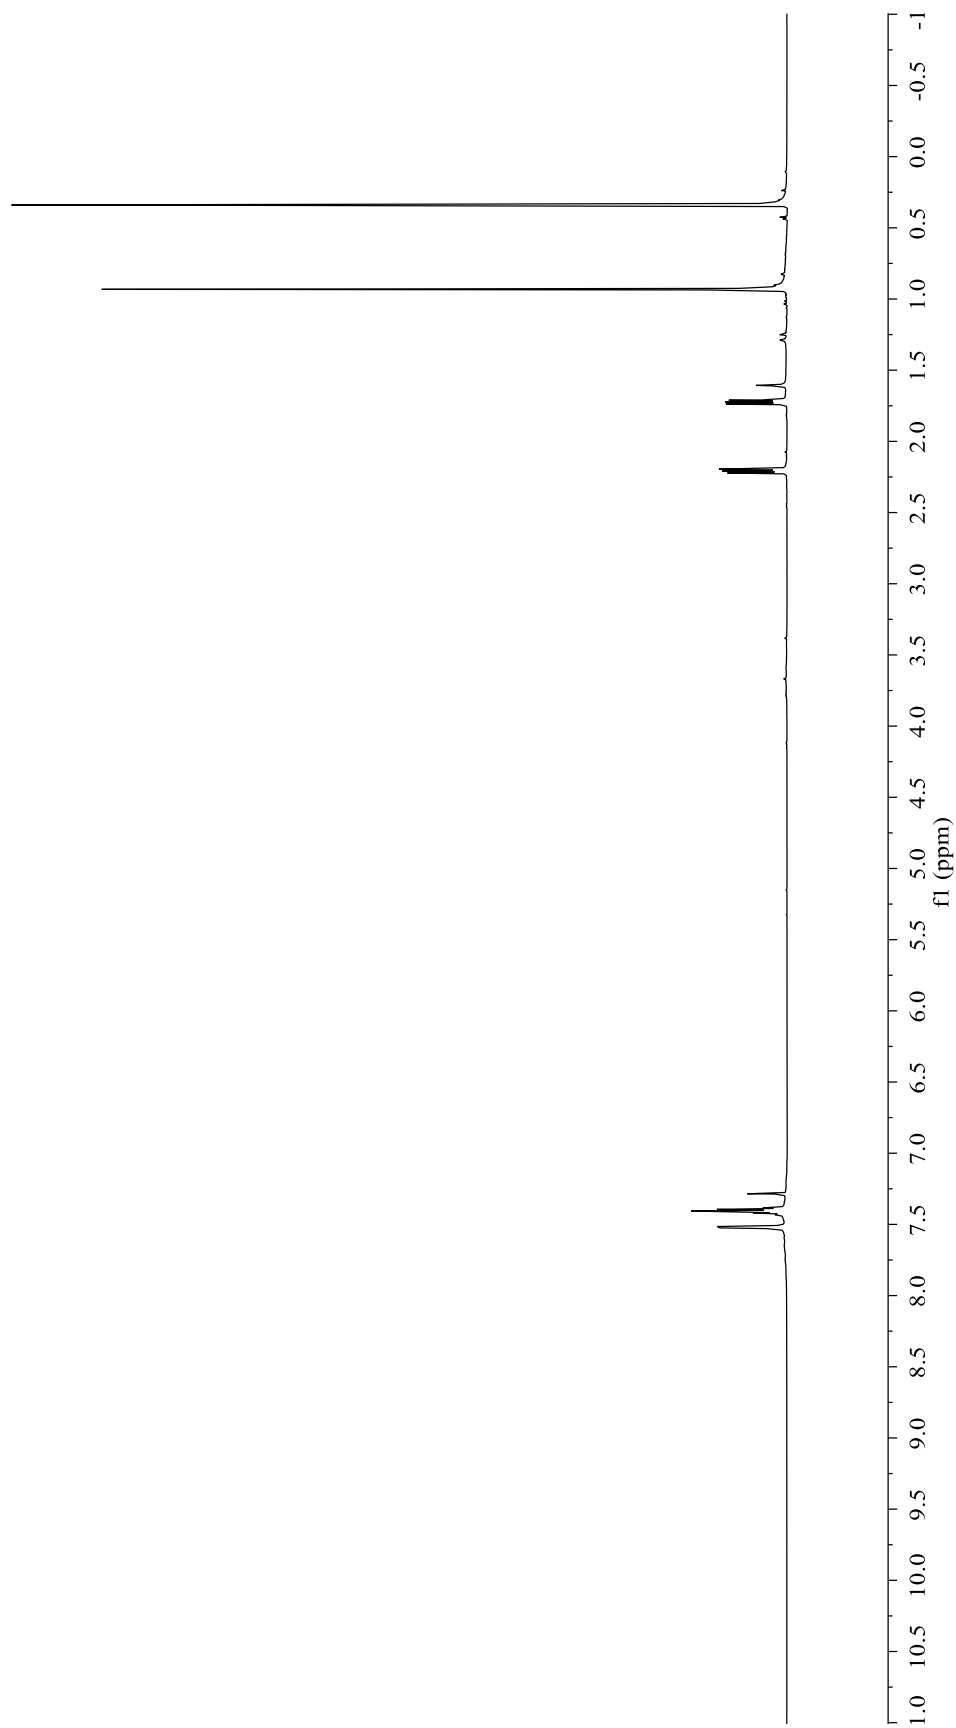

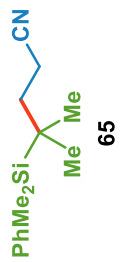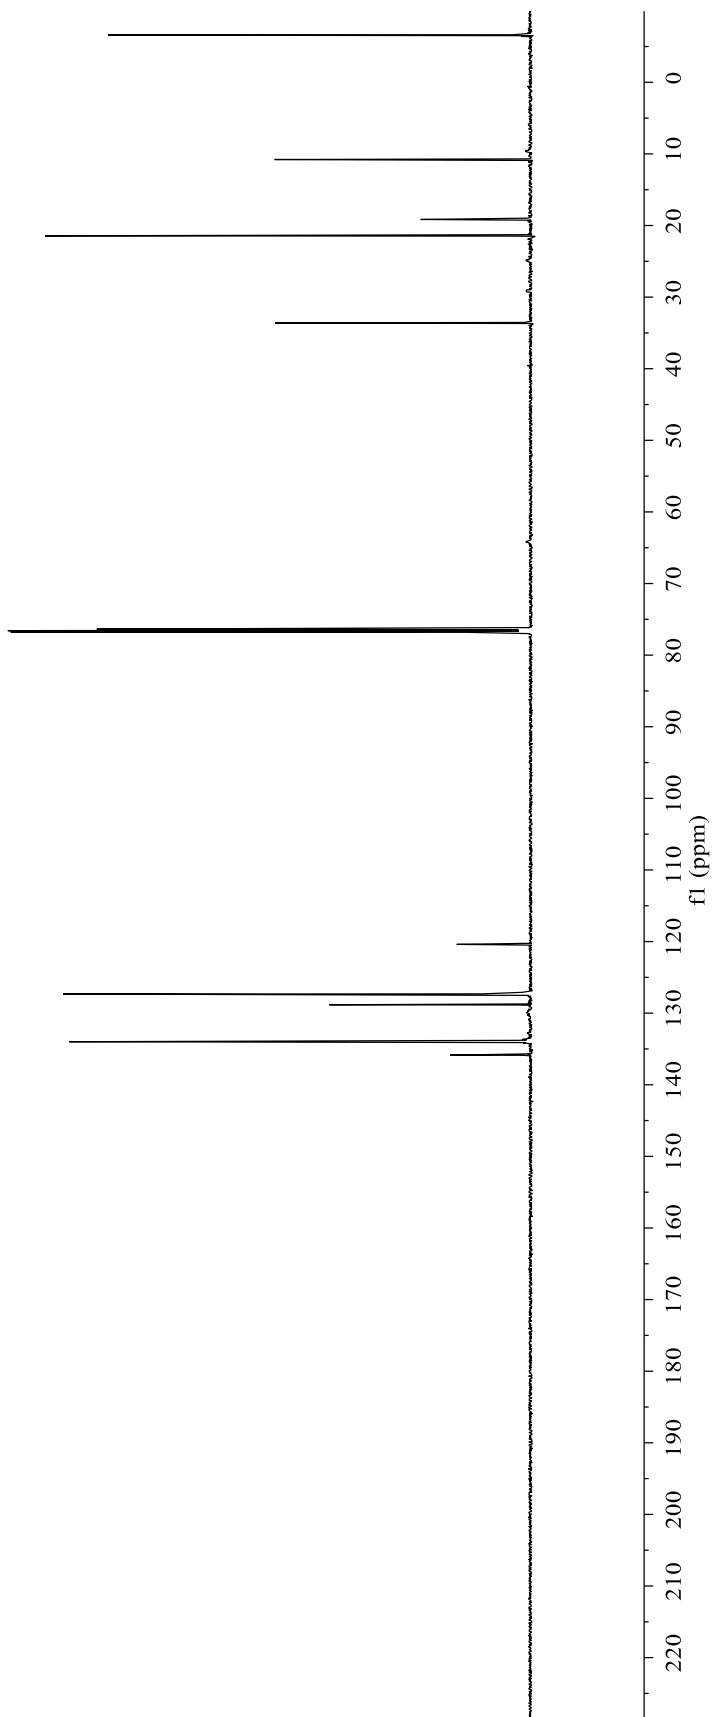

S175

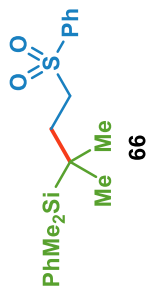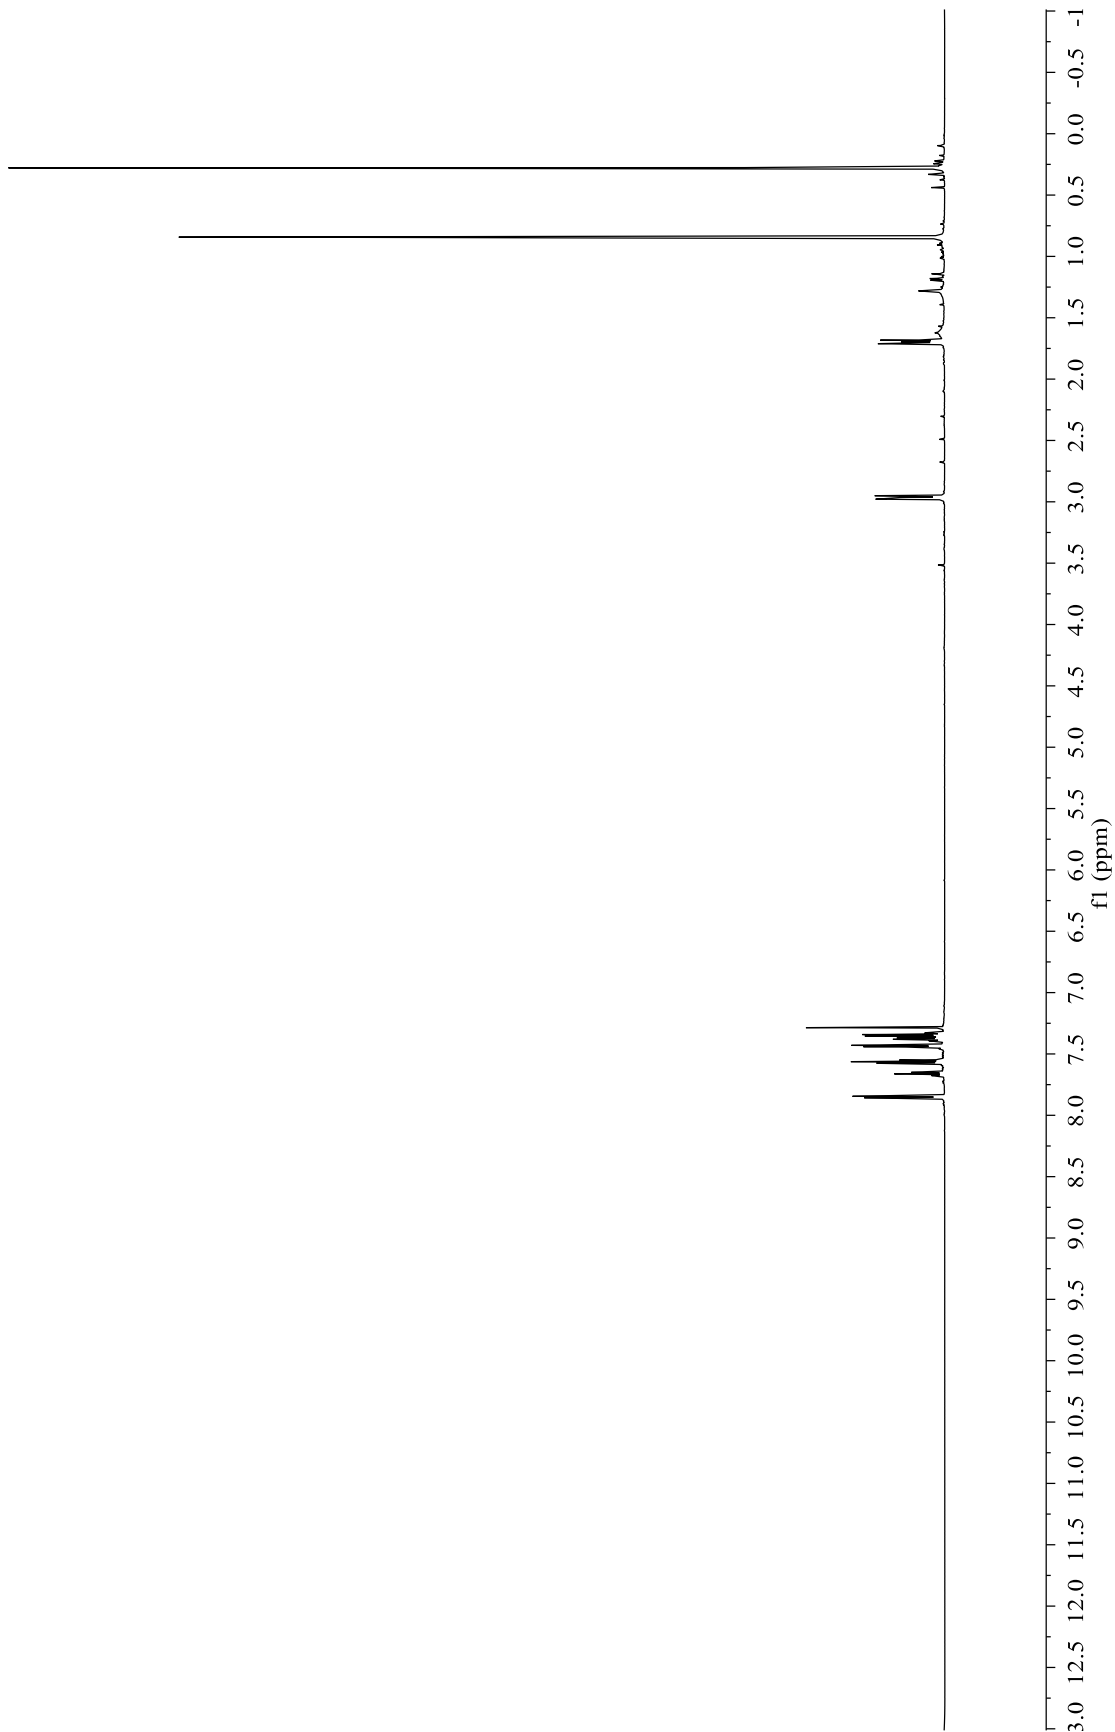

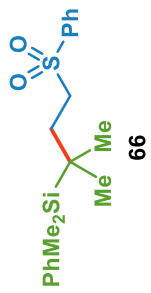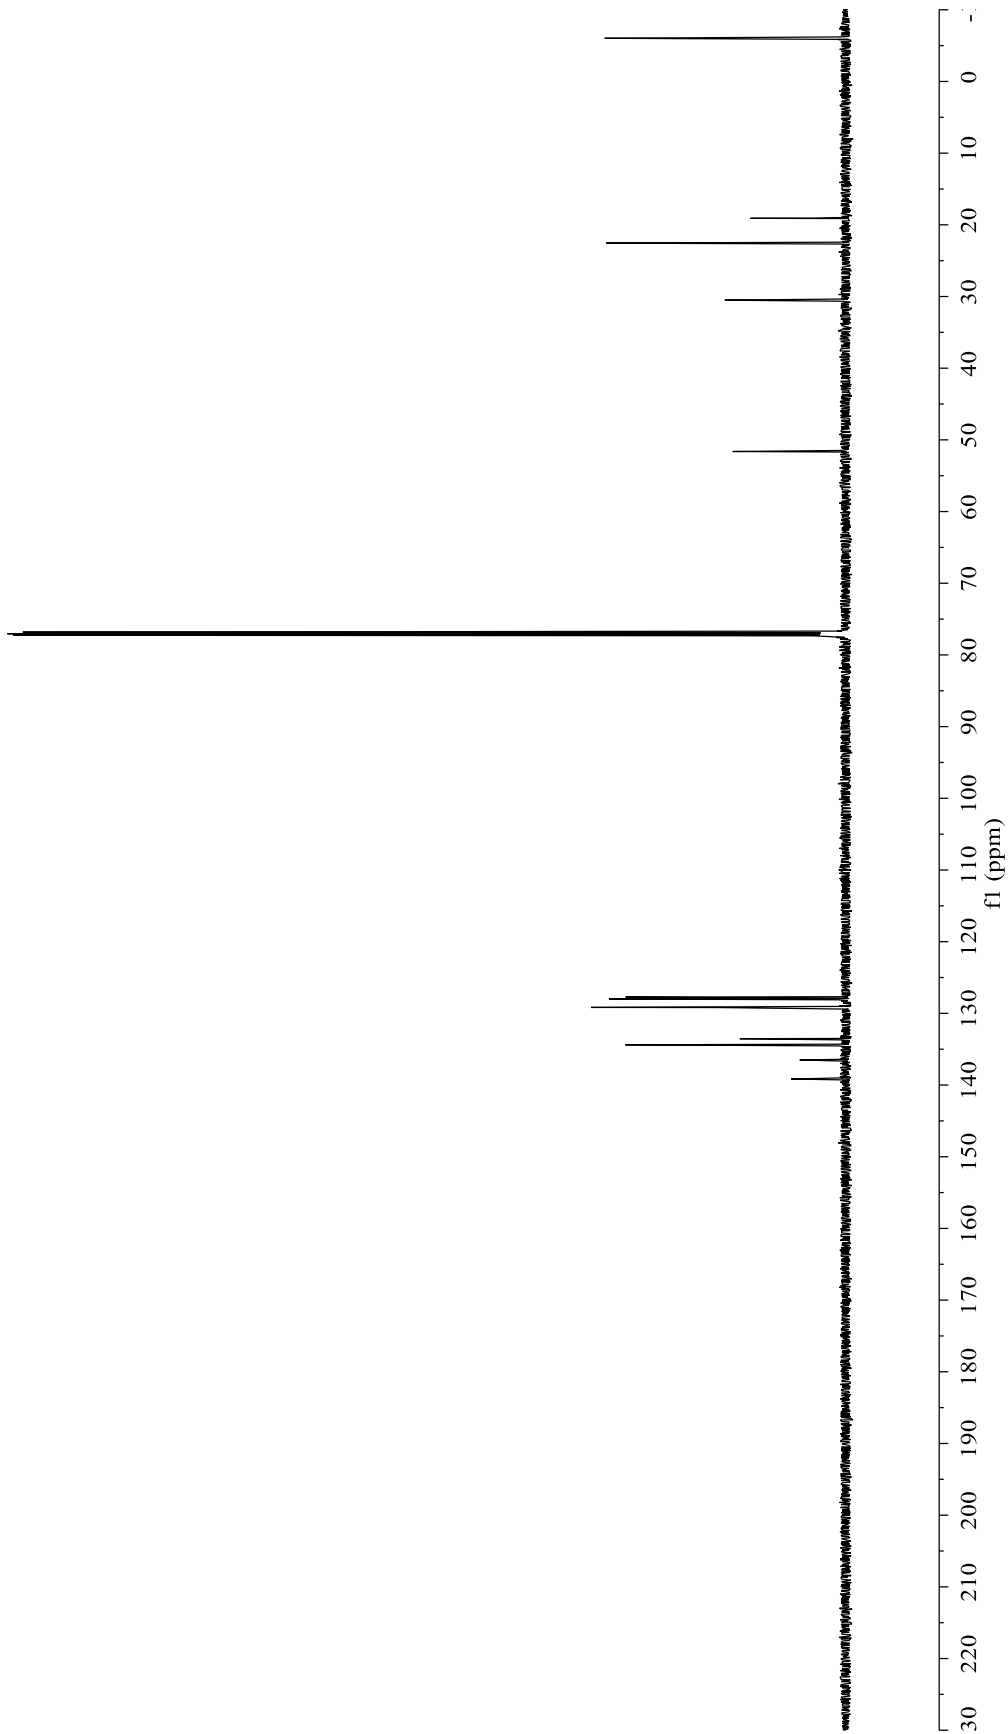

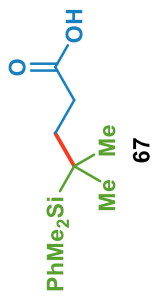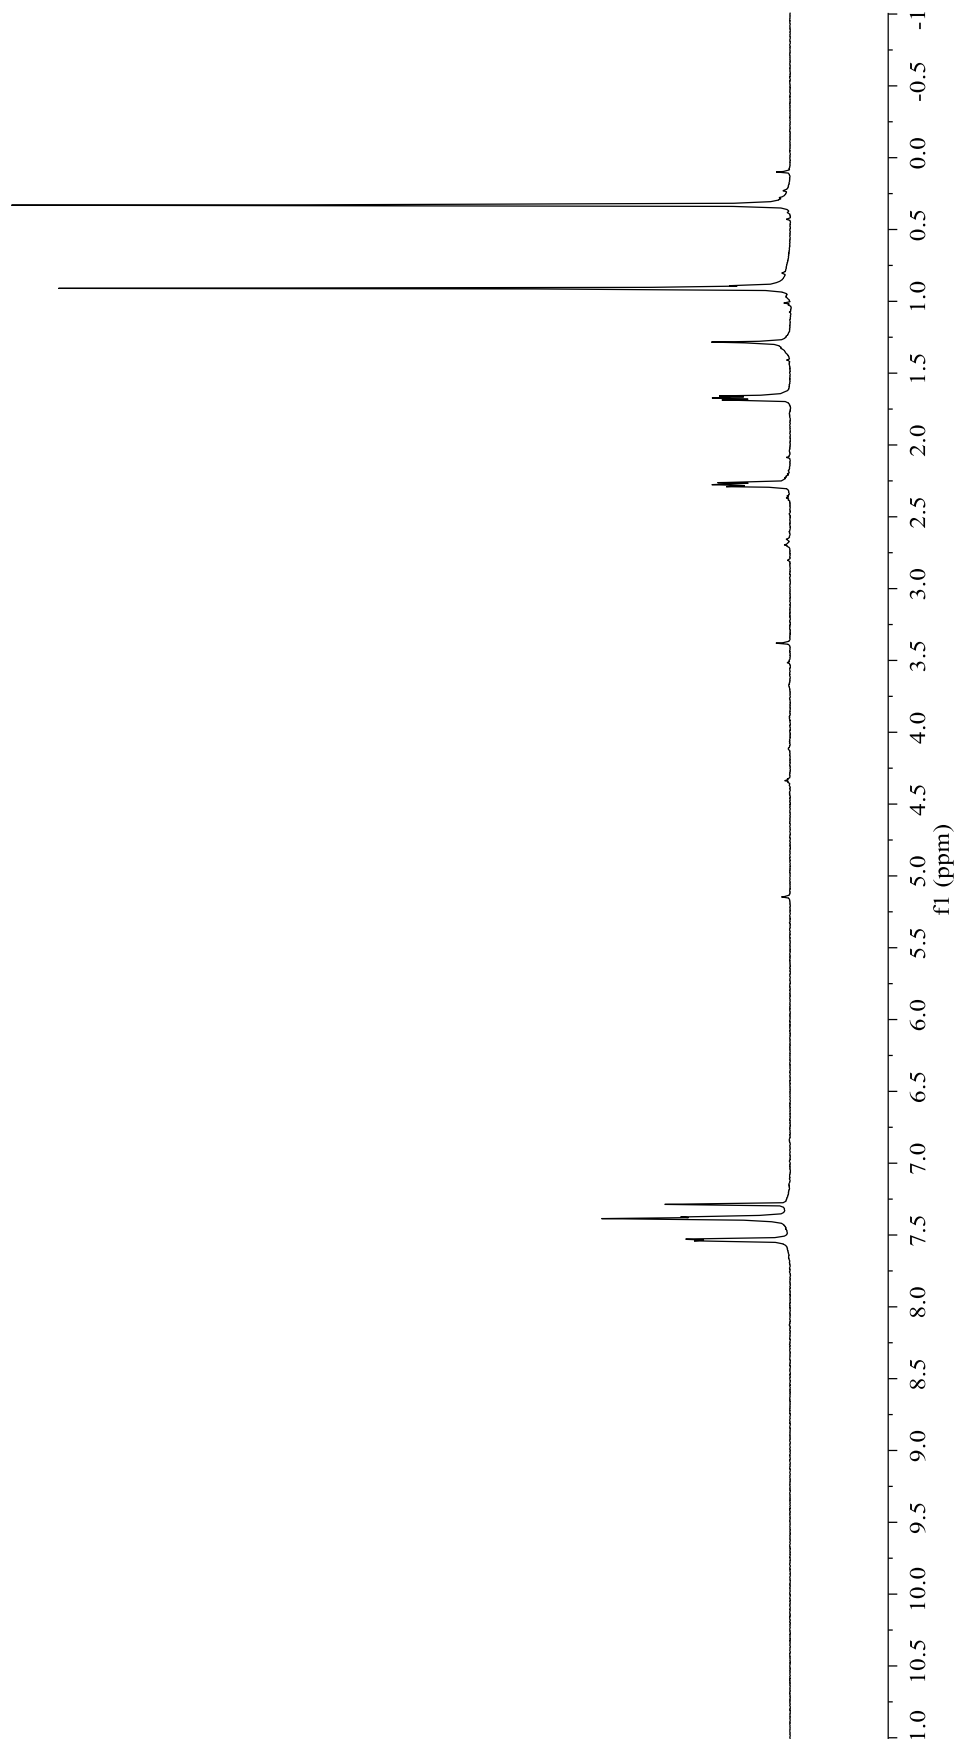

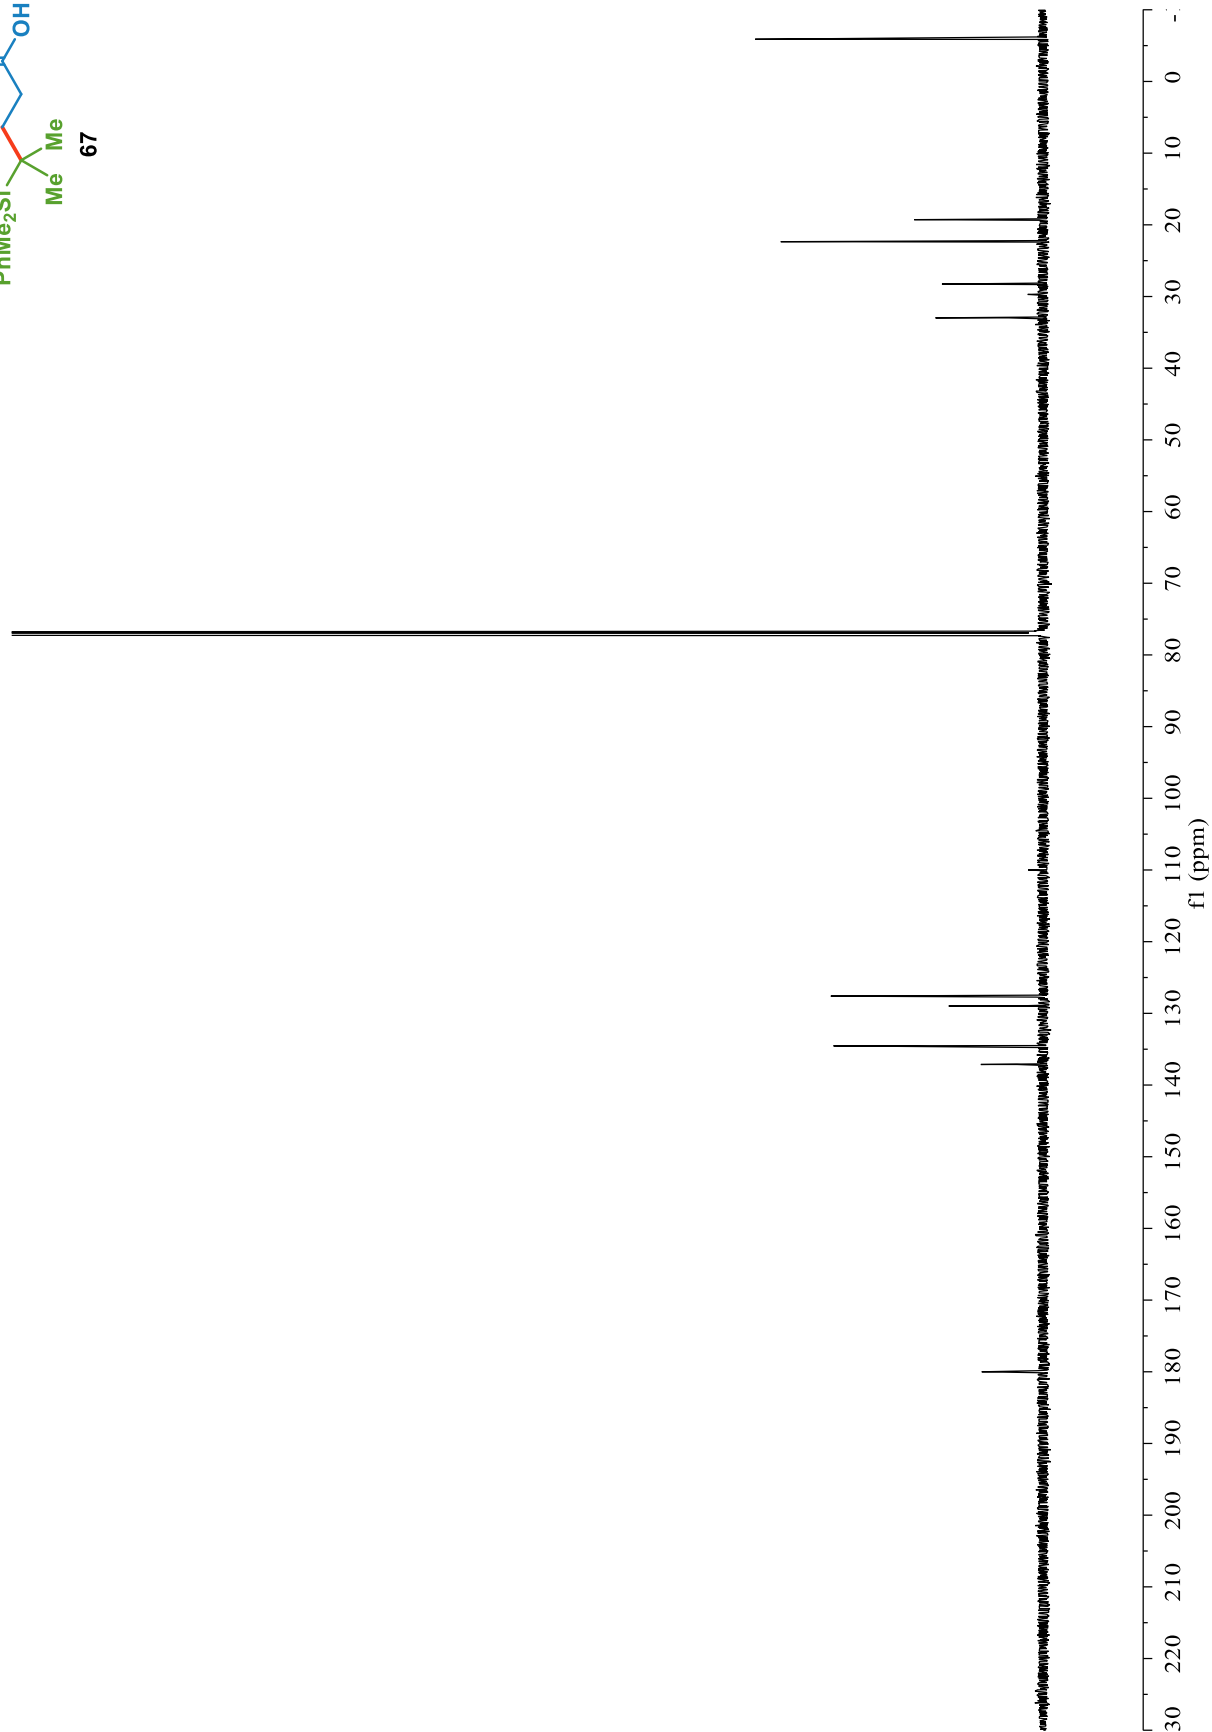

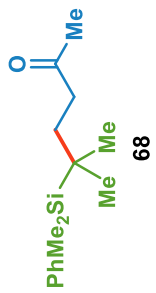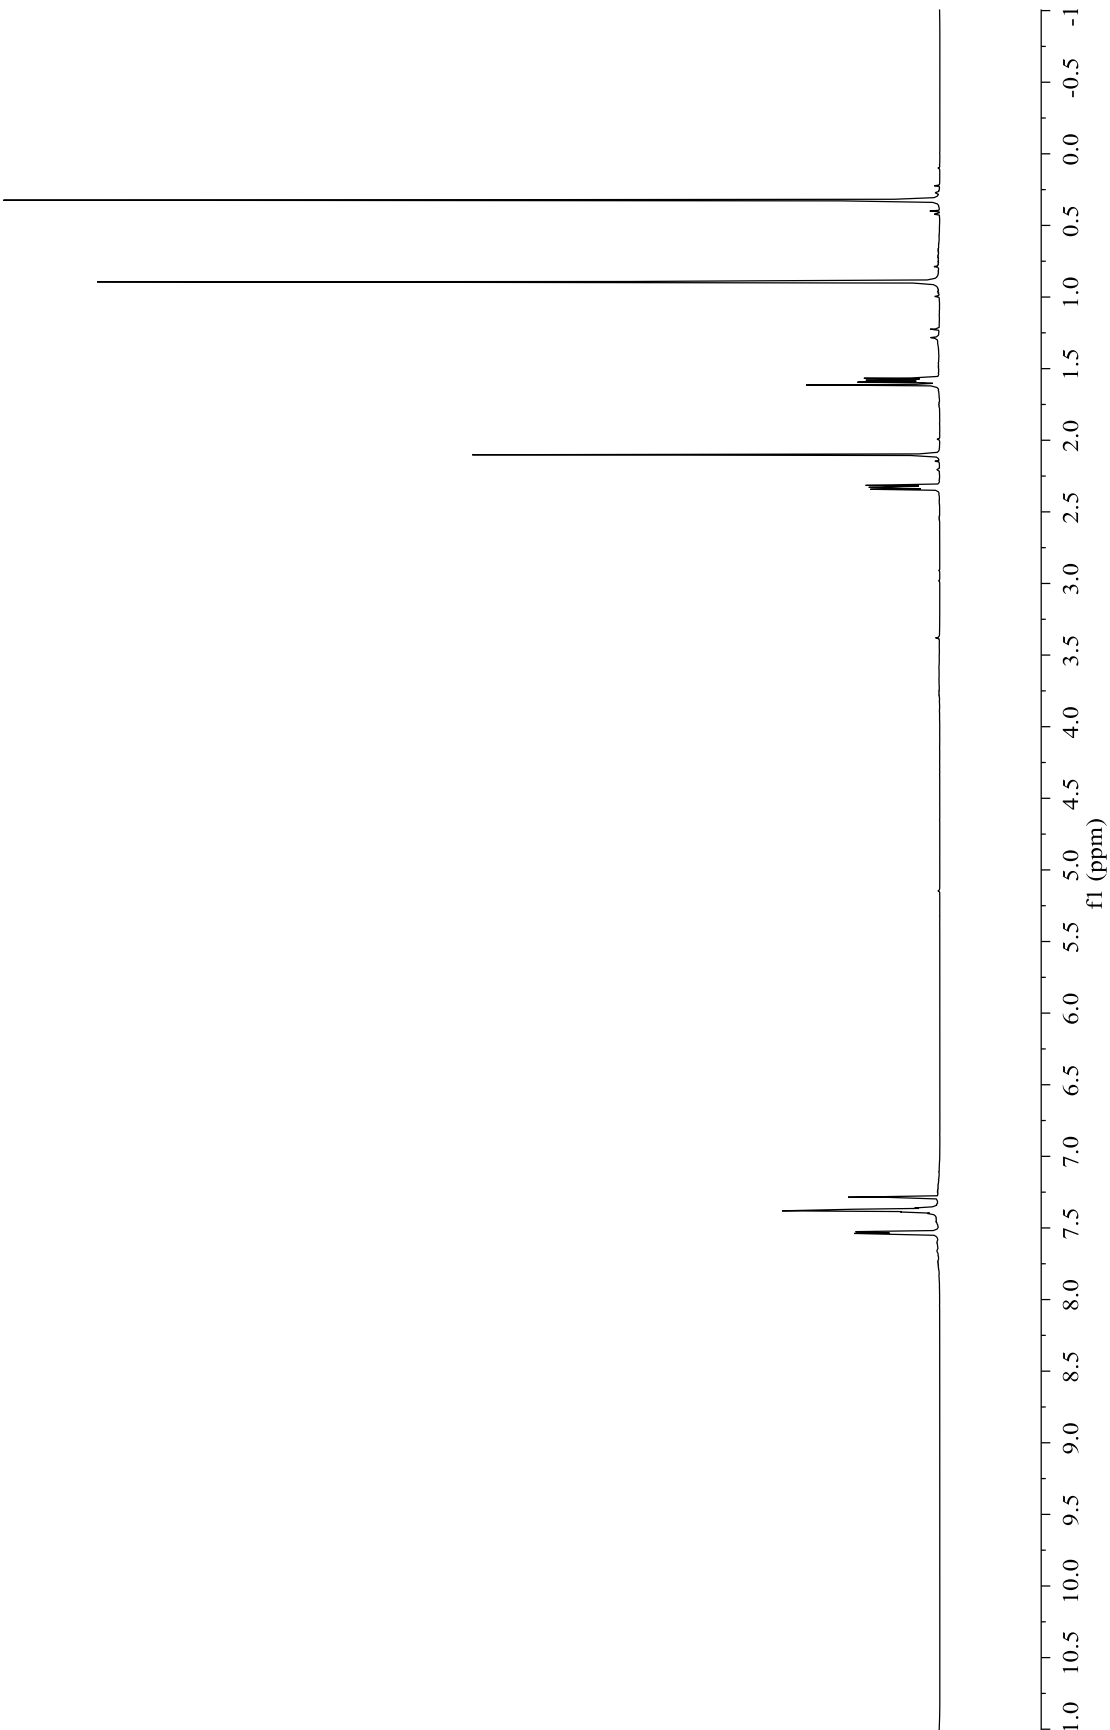

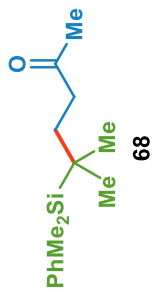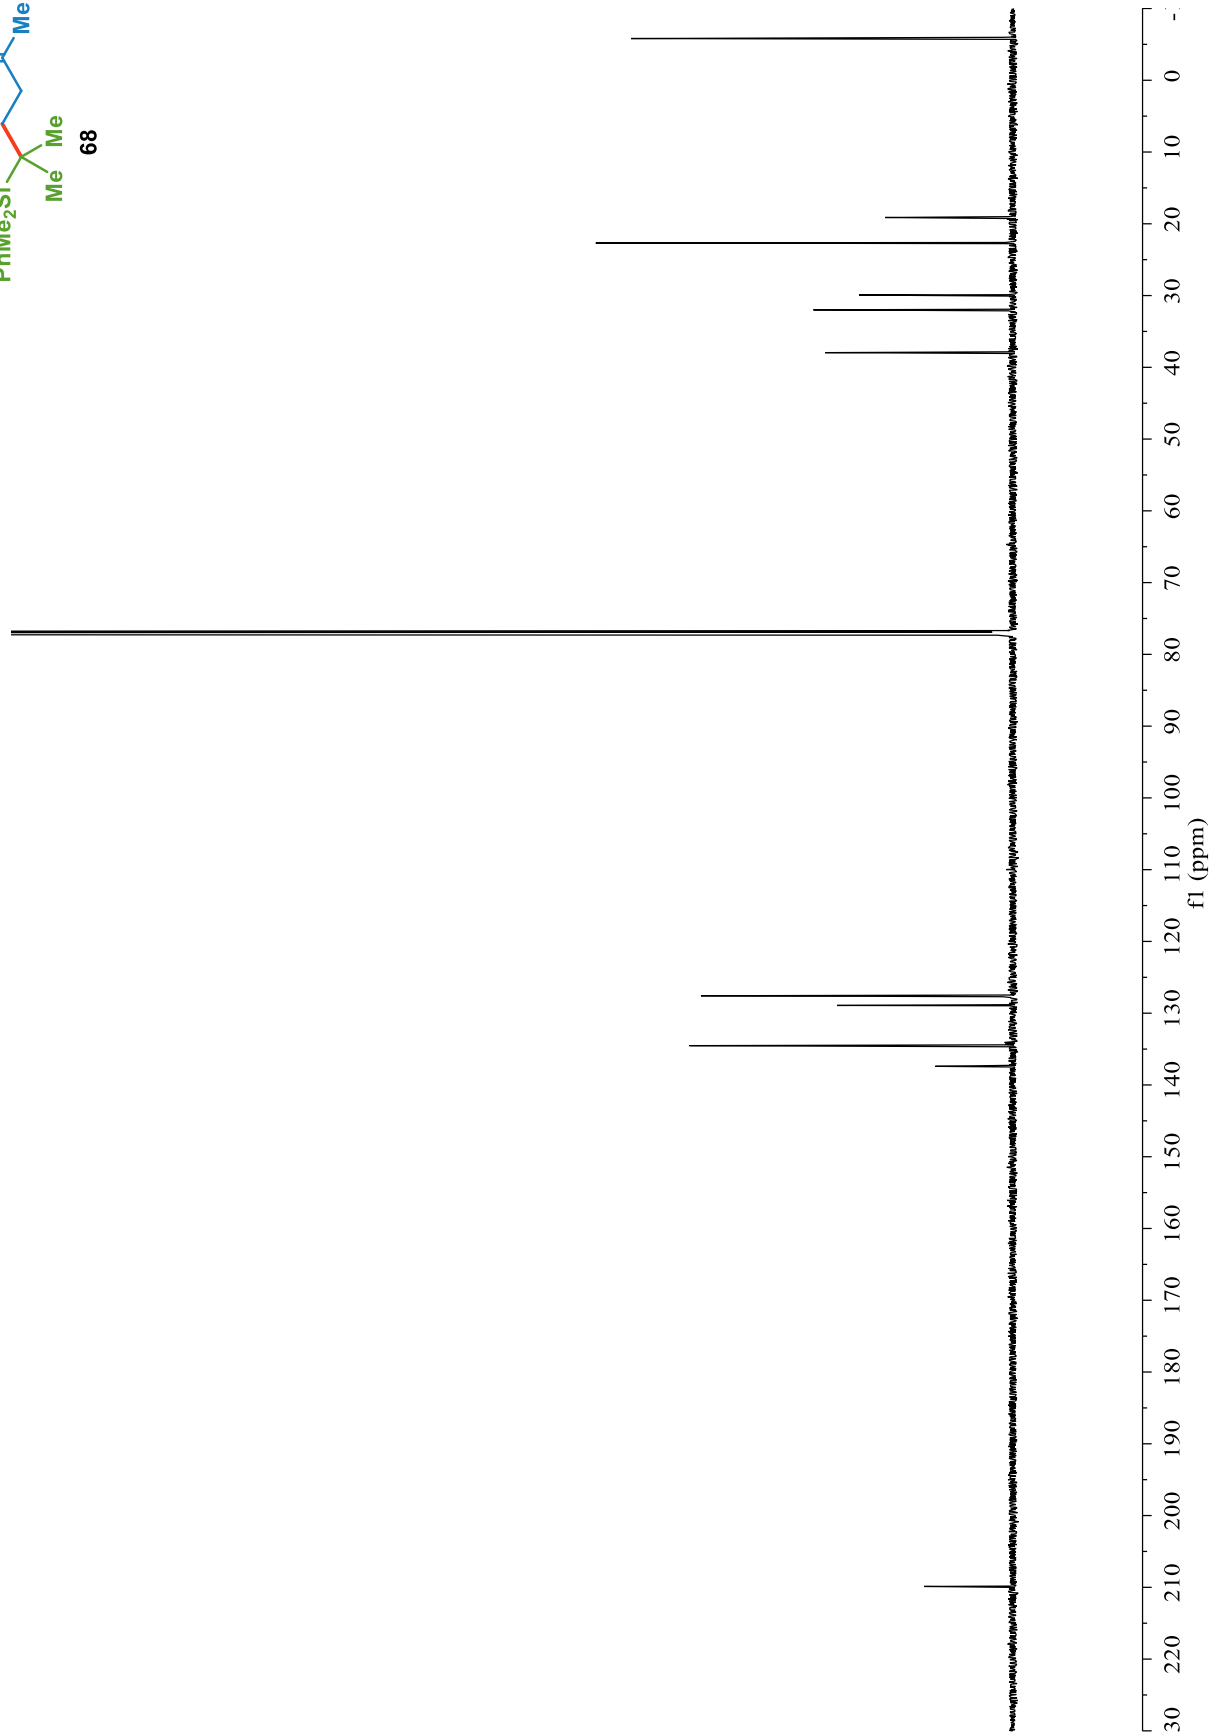



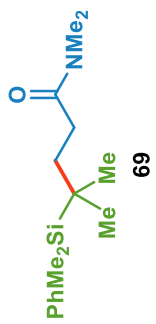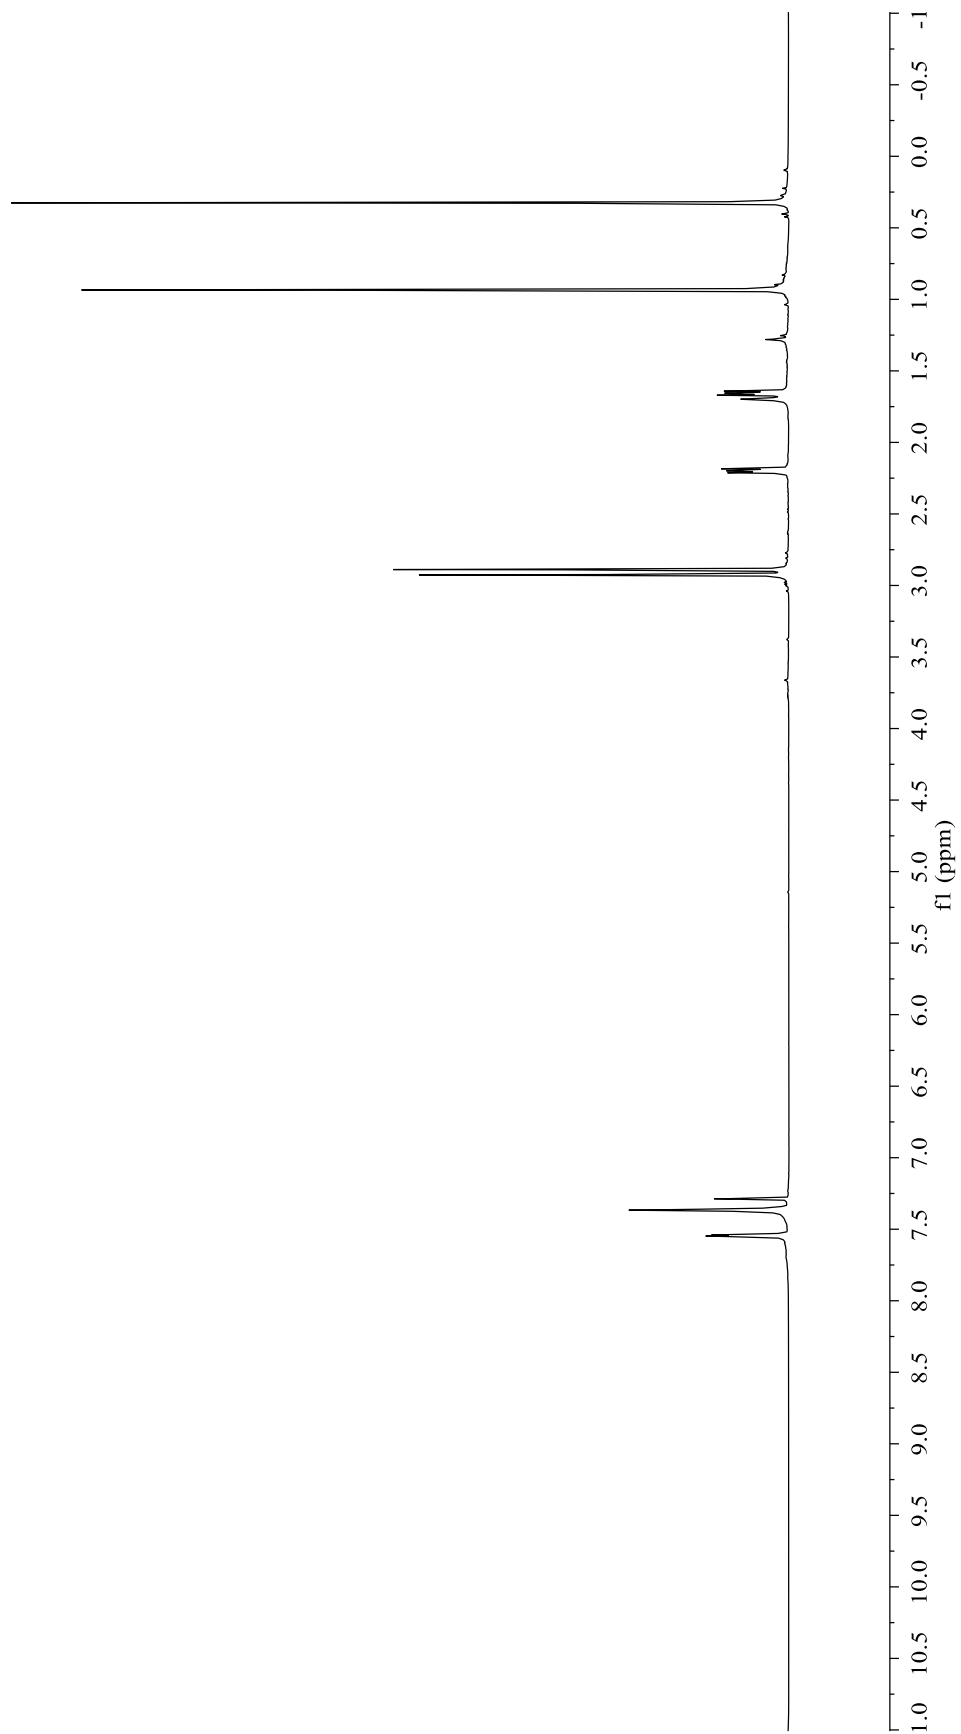



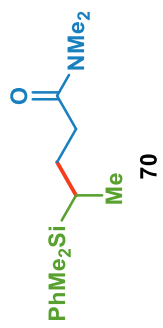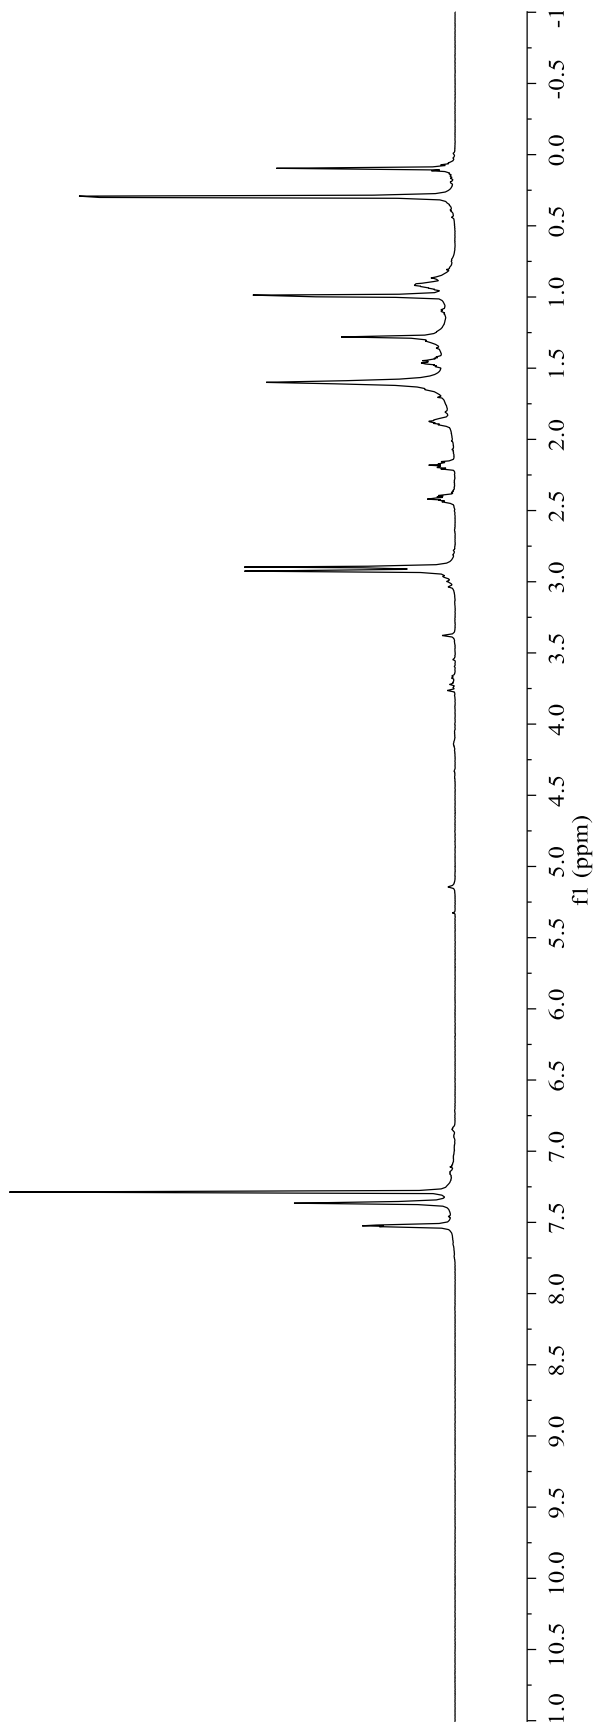

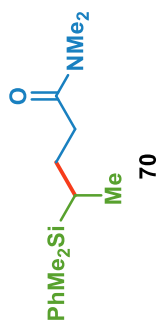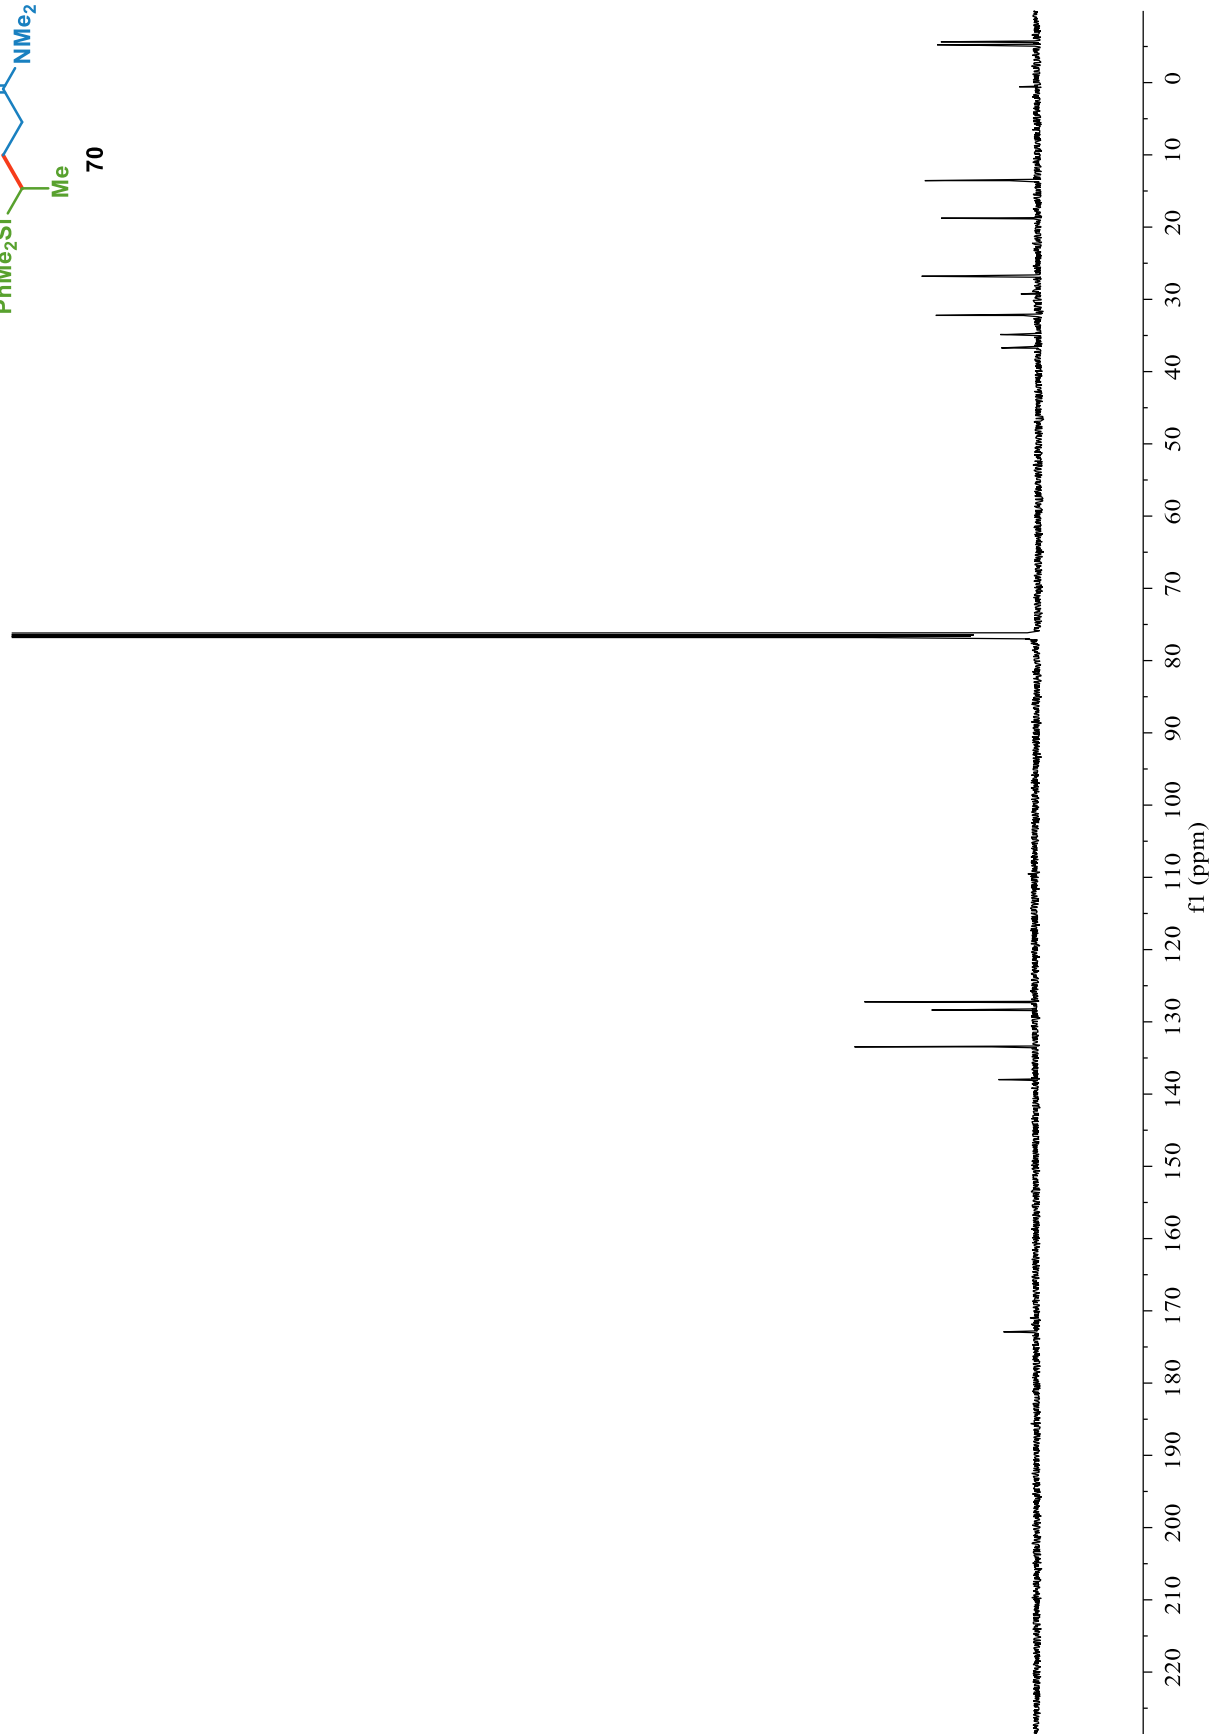

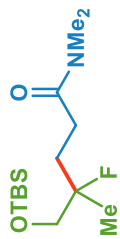

71

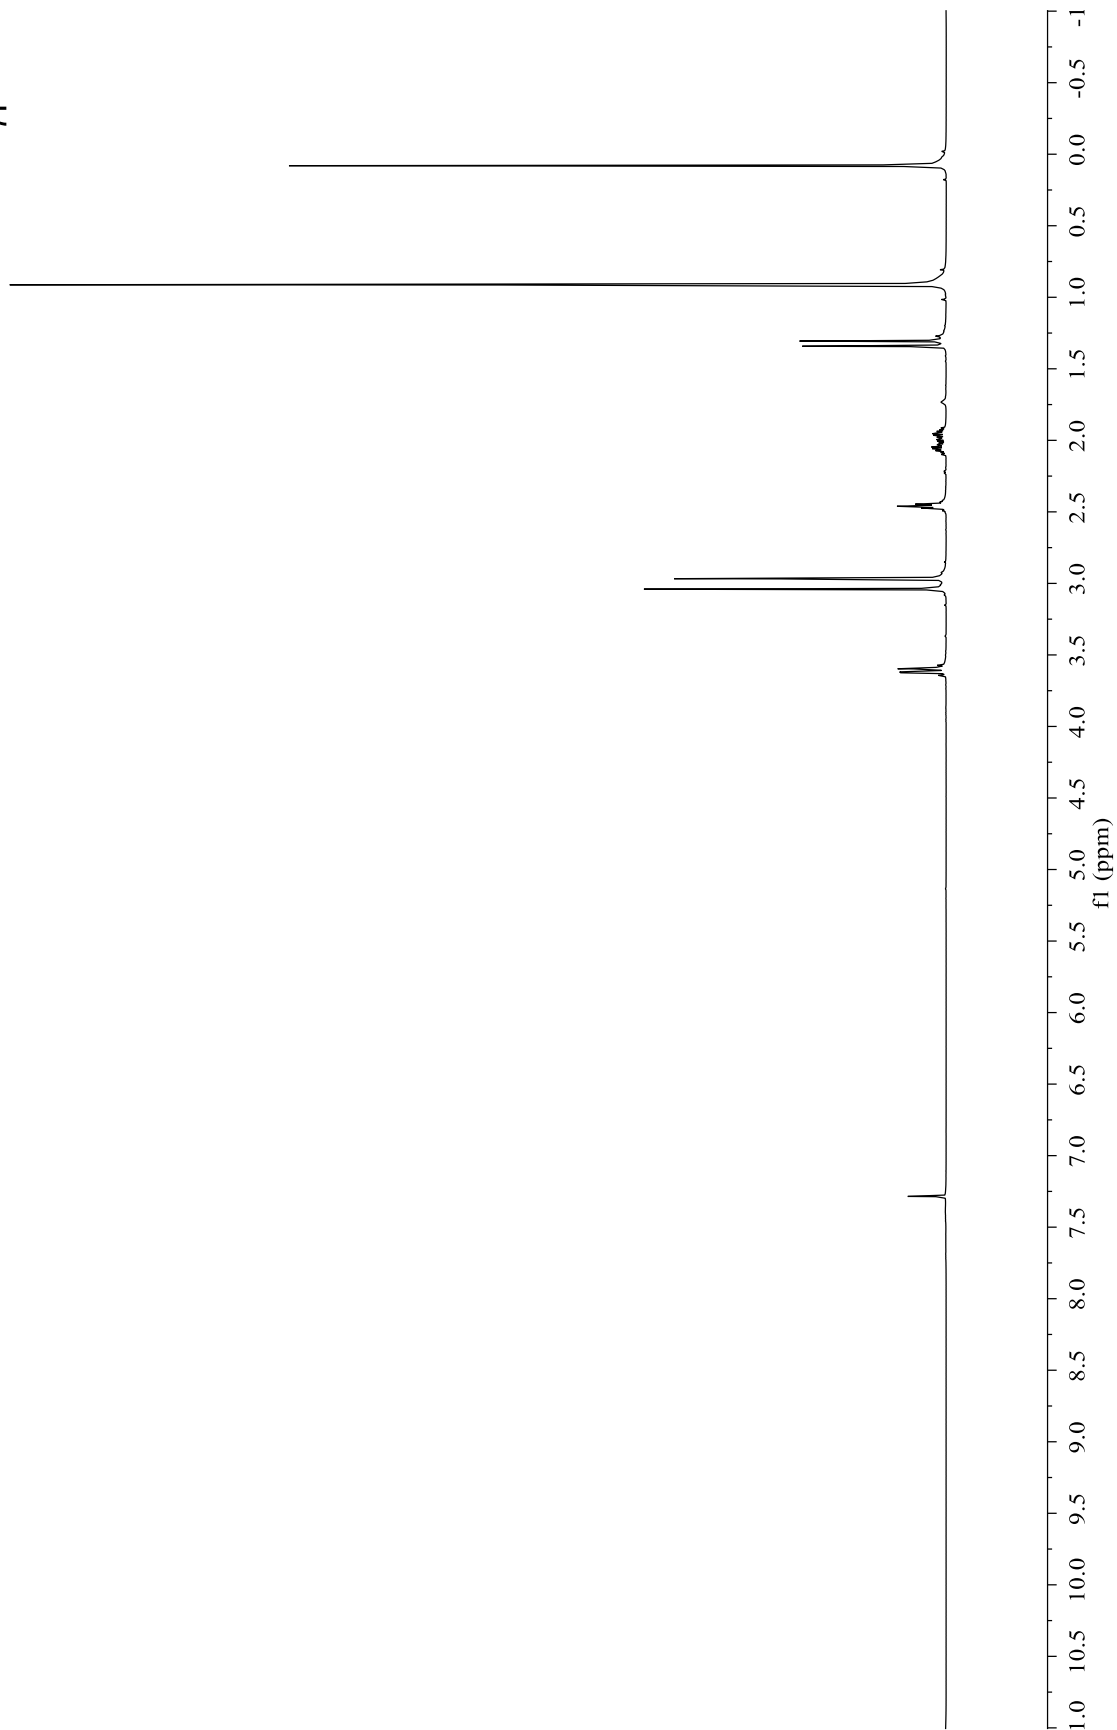

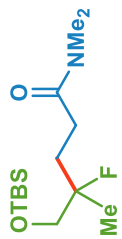

71

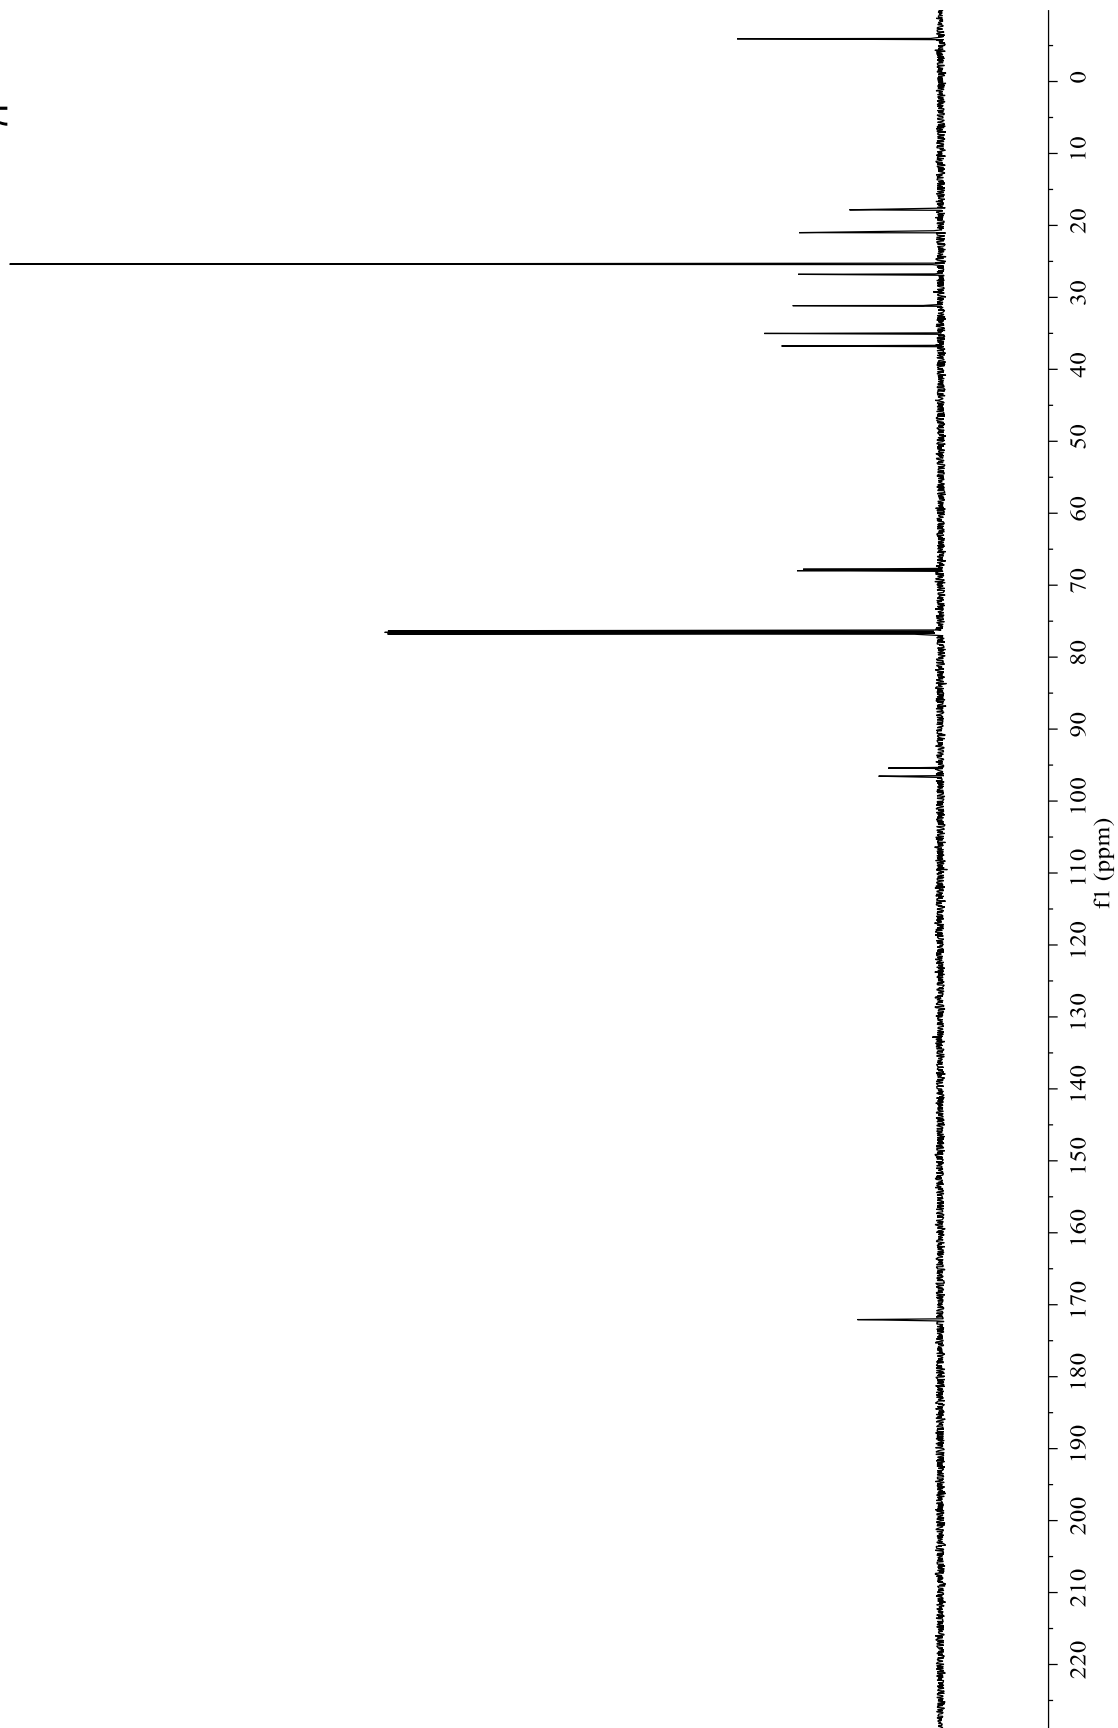



71

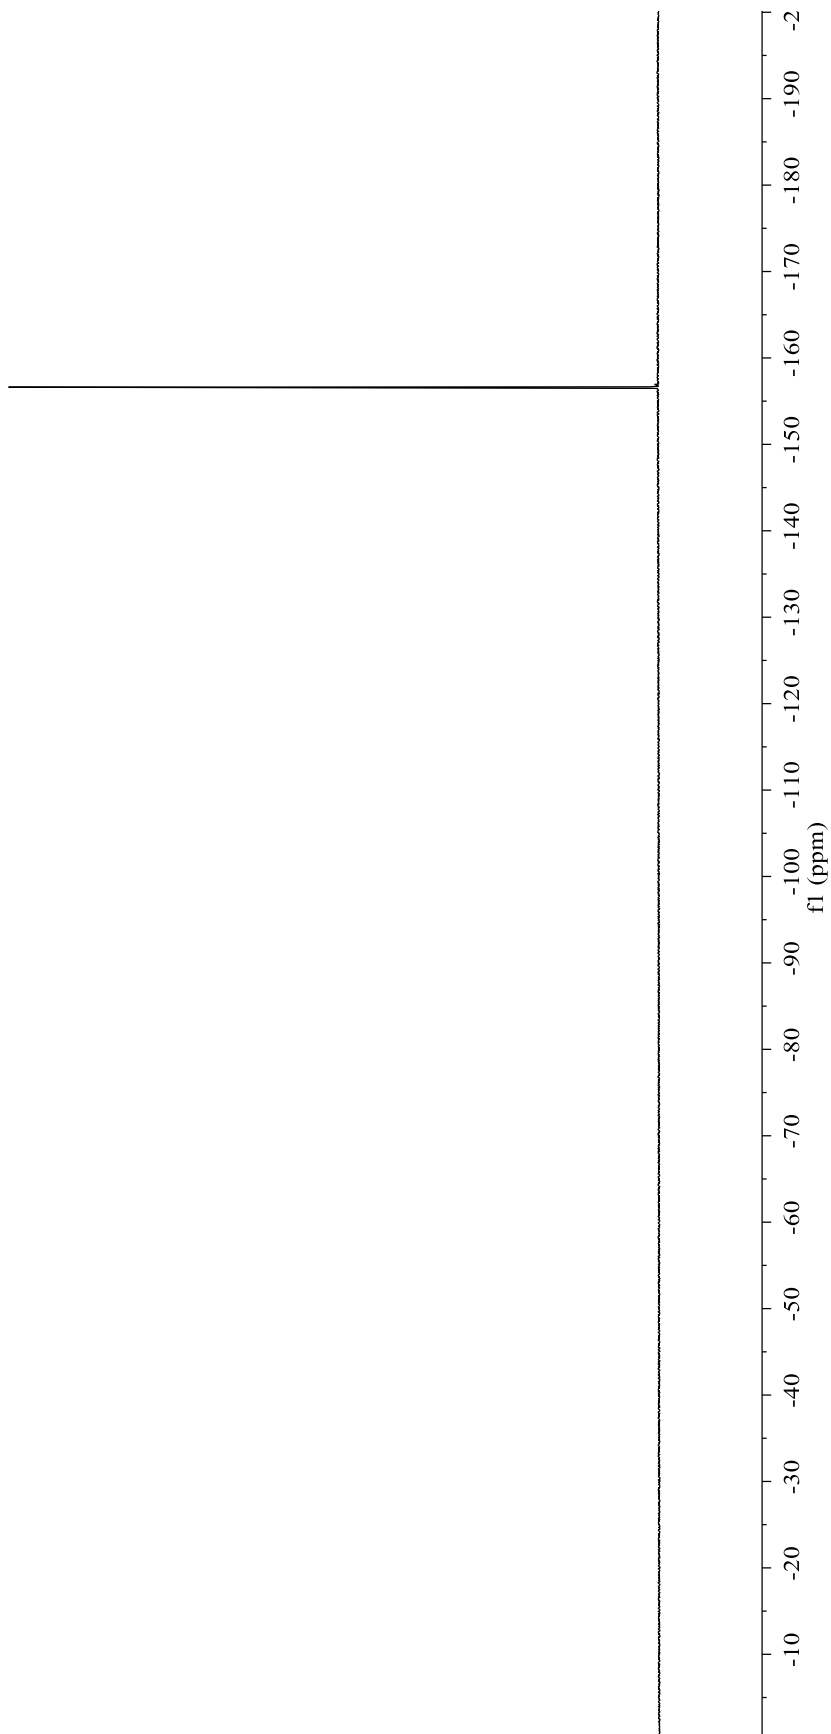

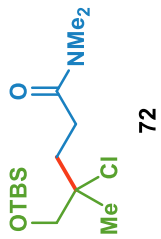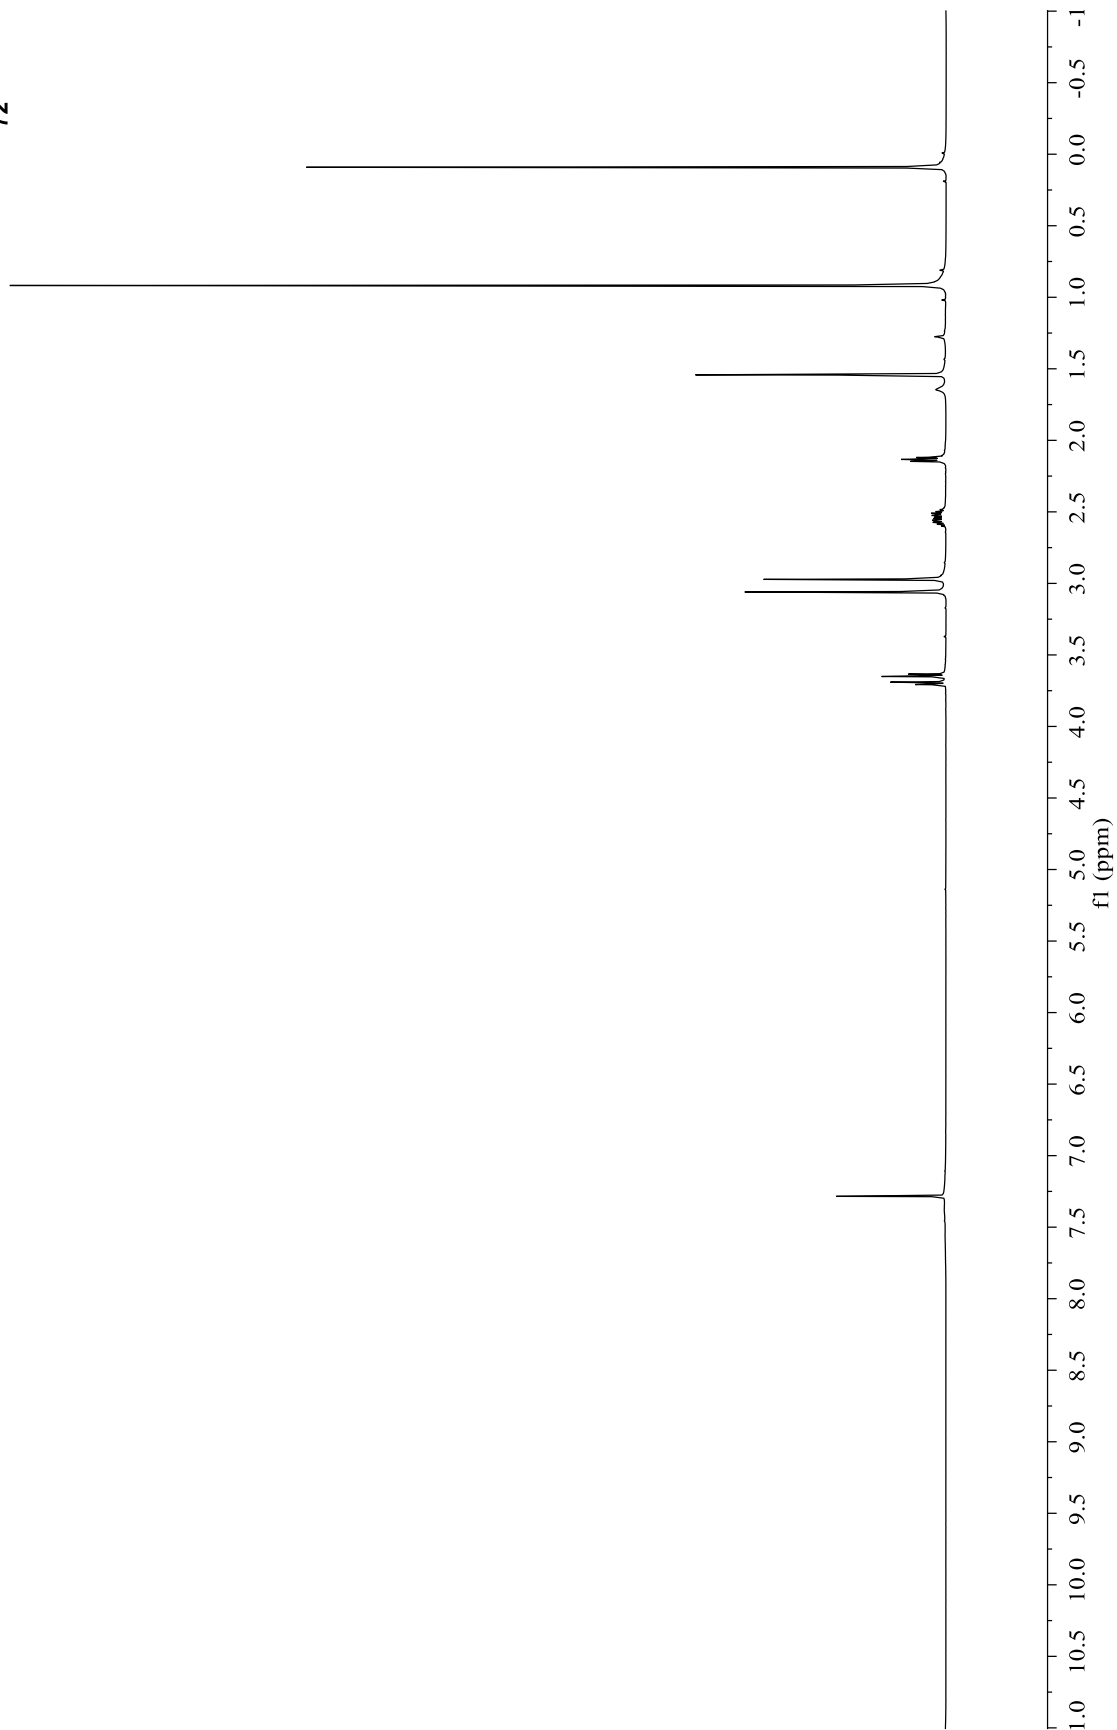



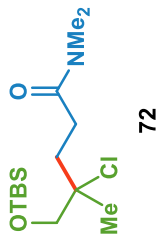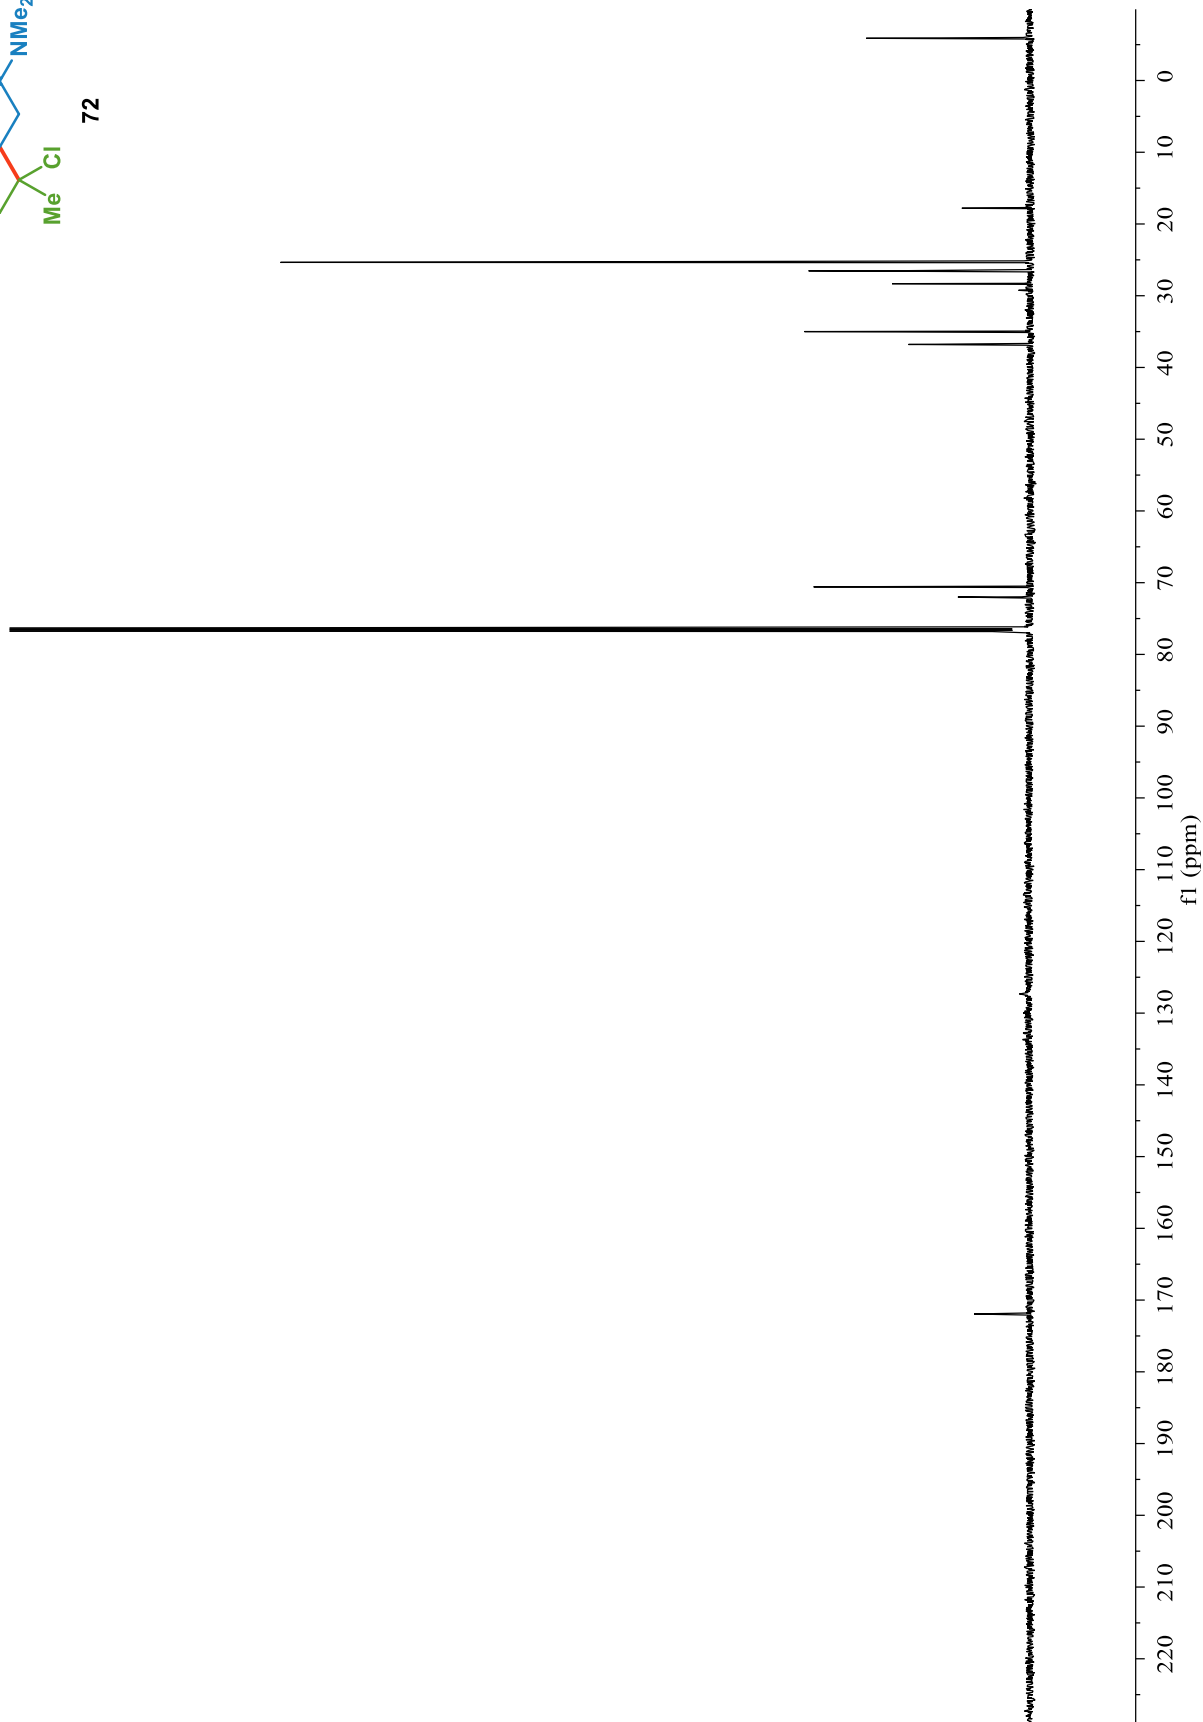

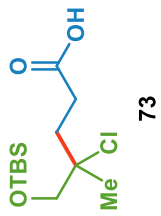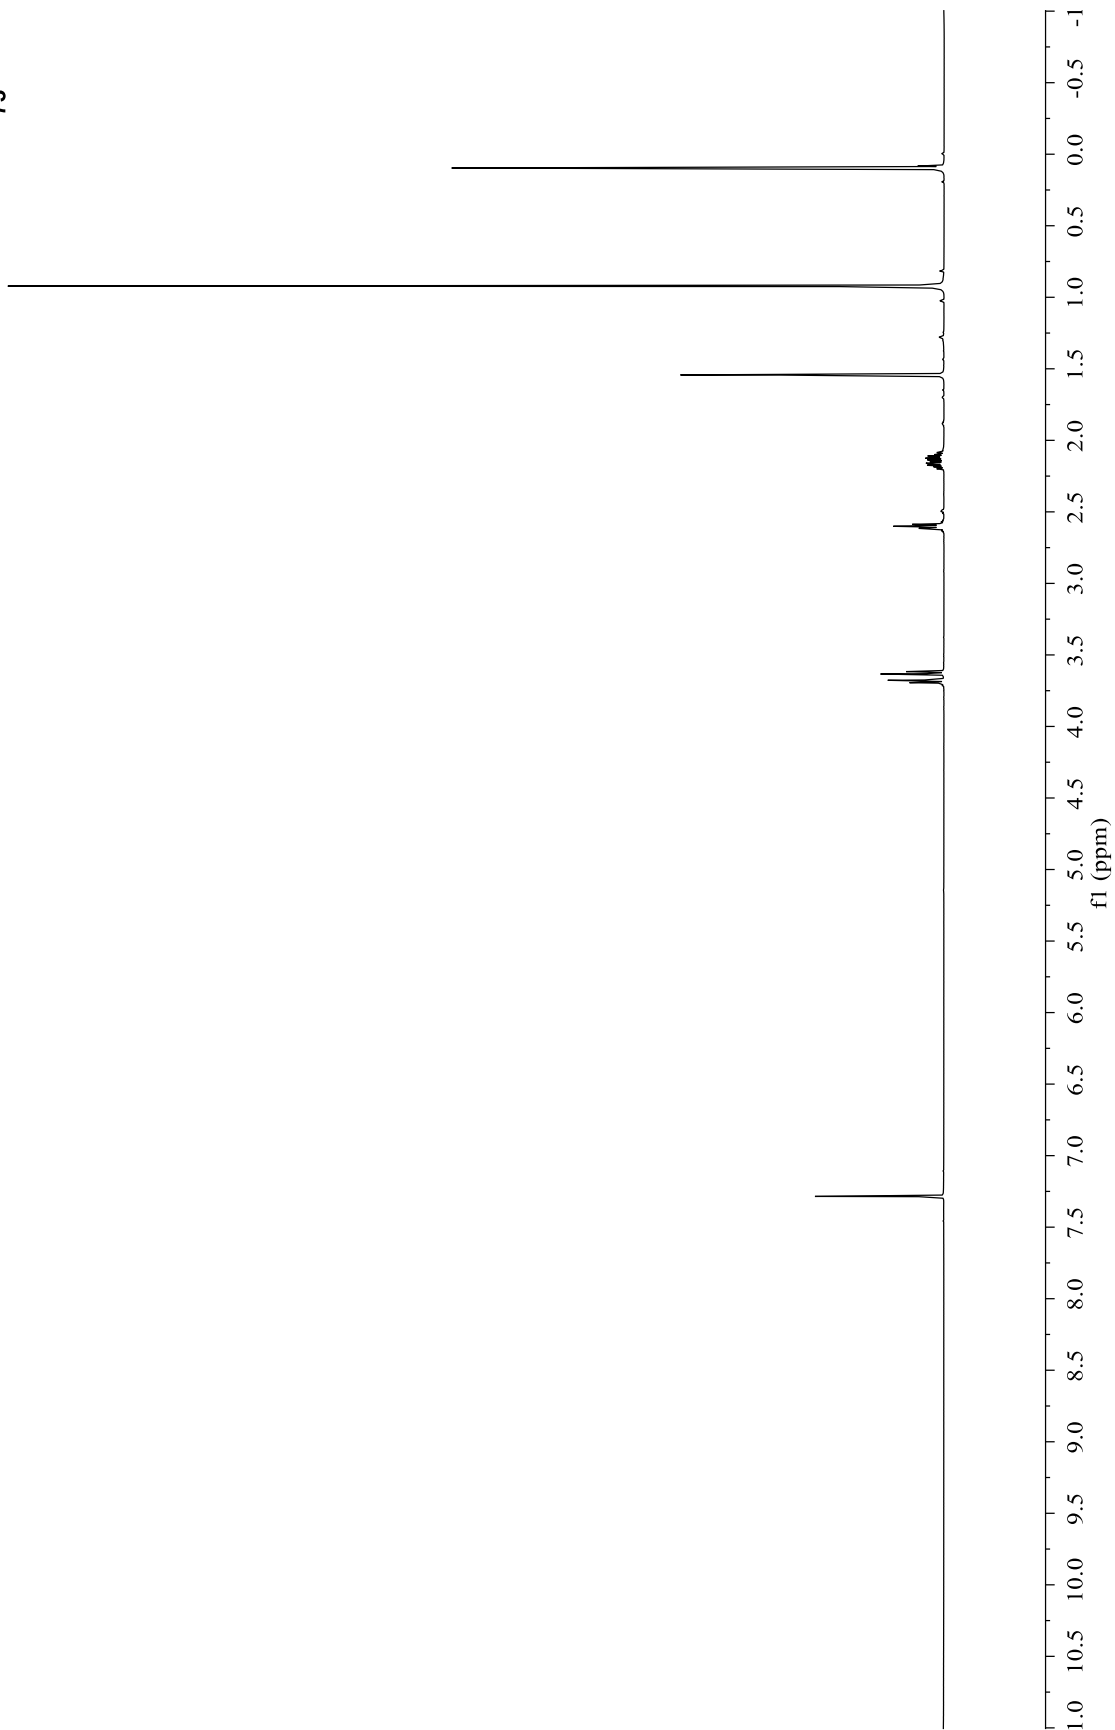

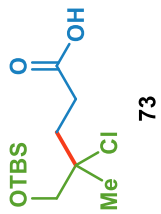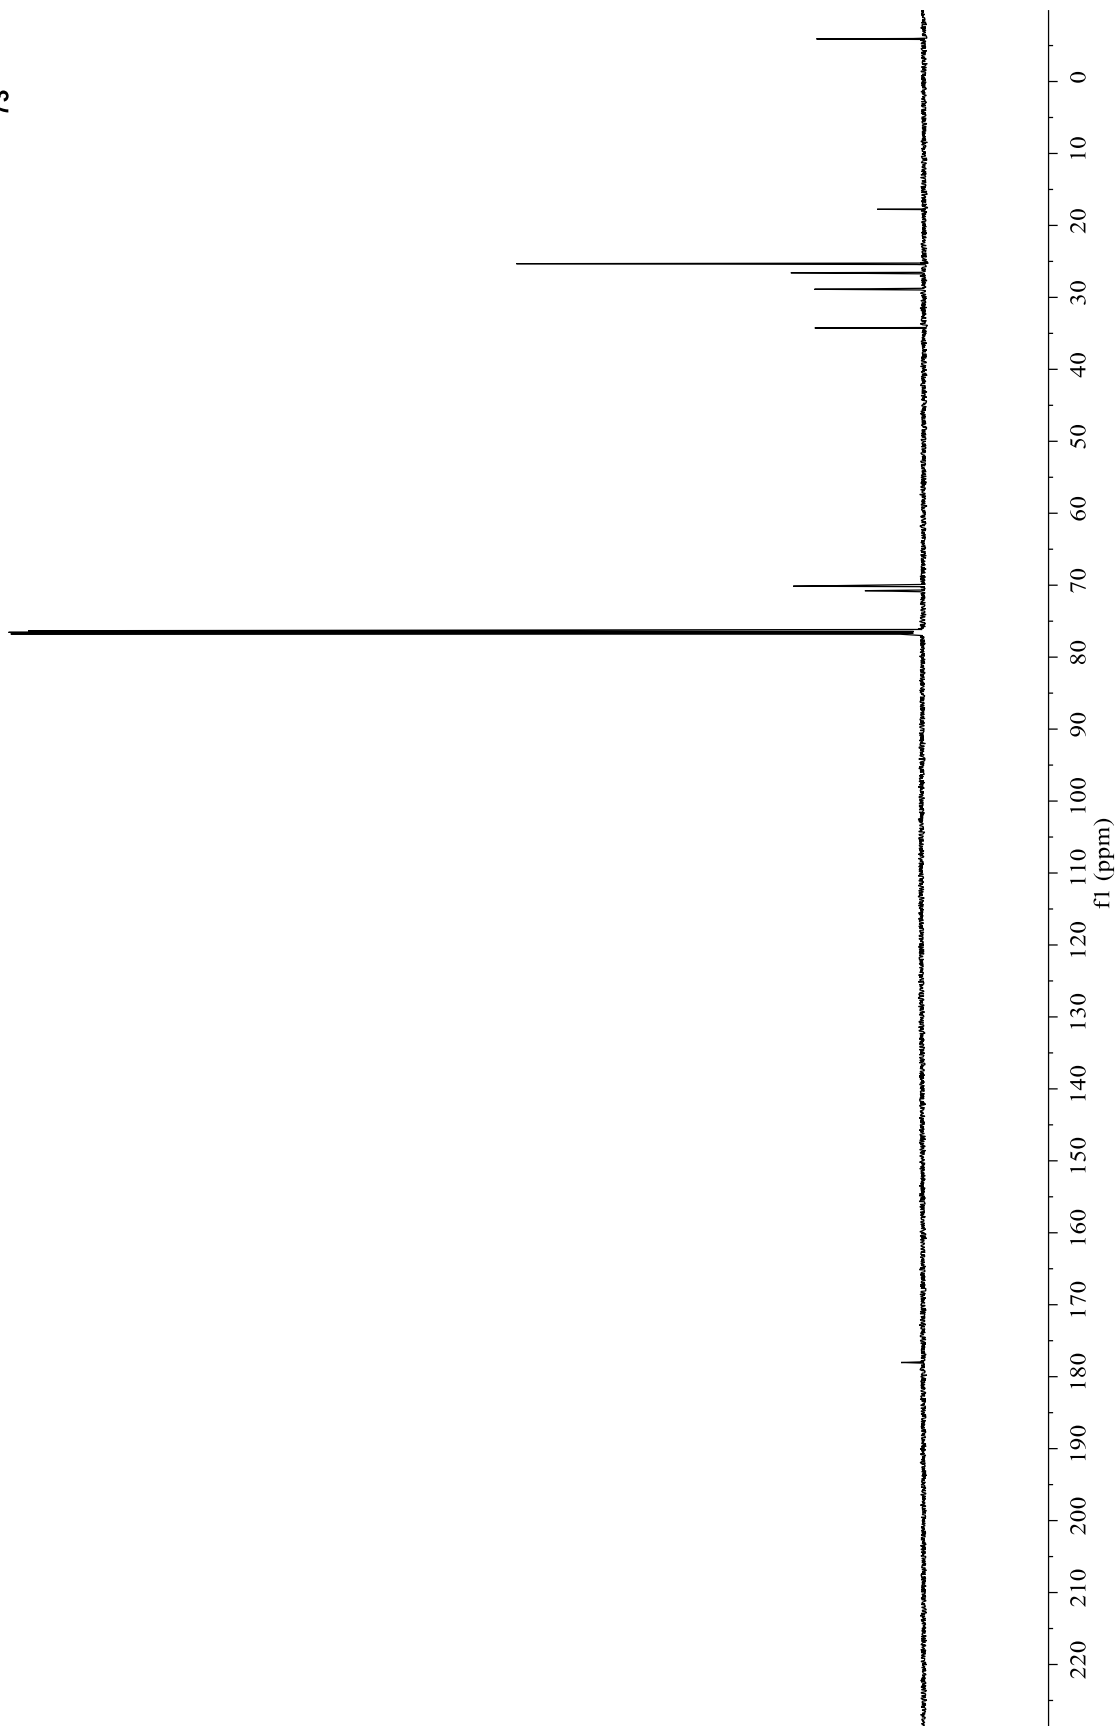

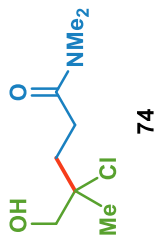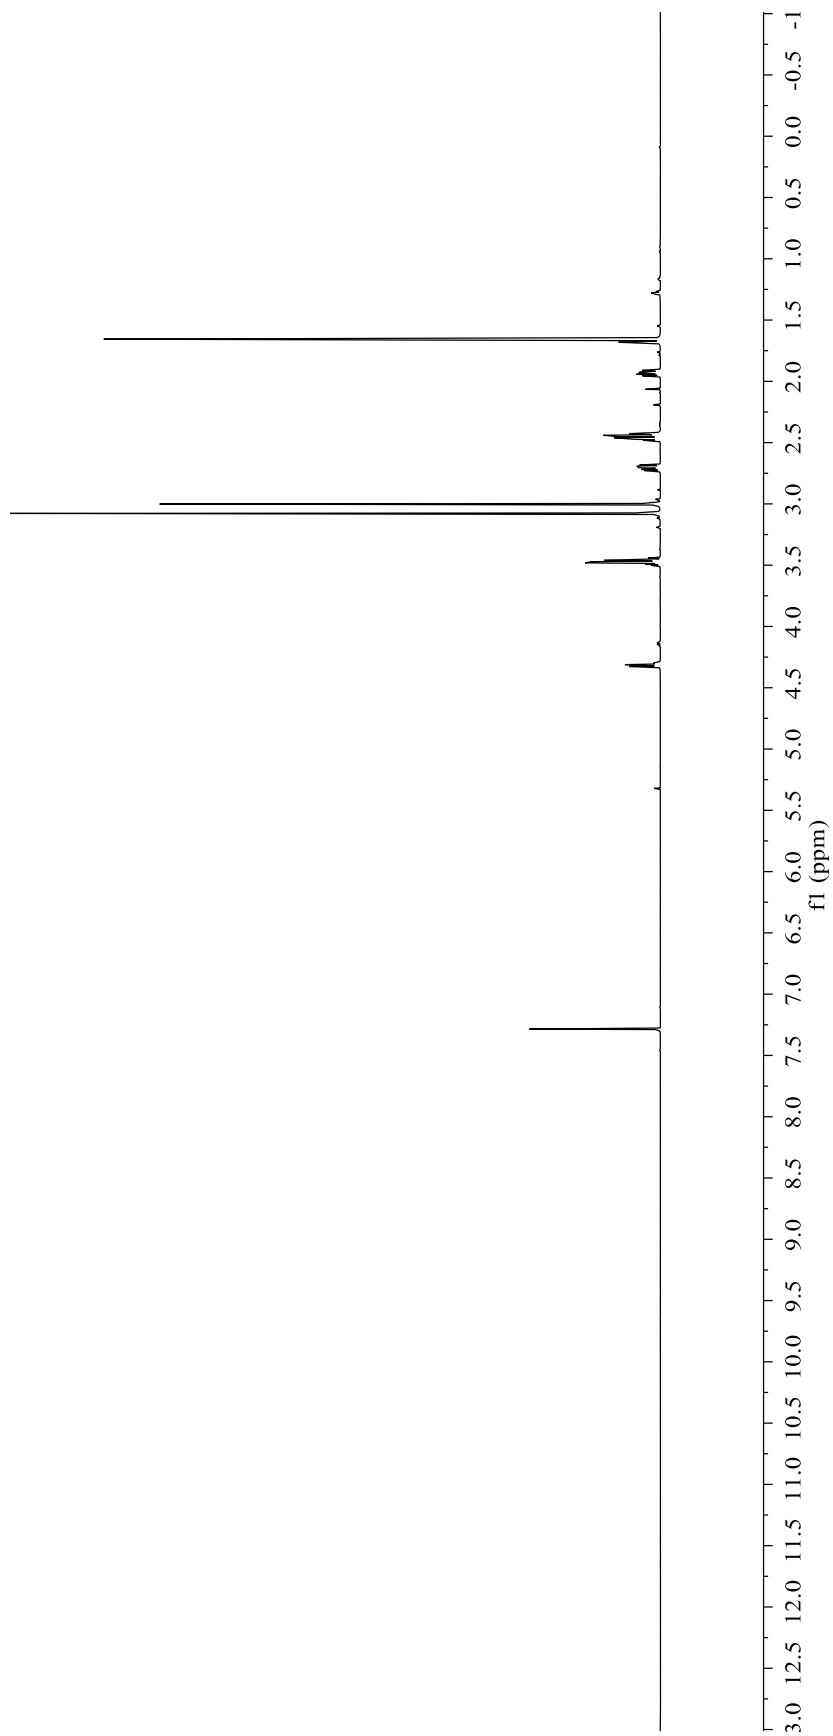

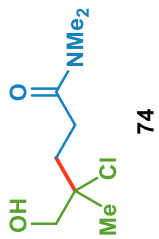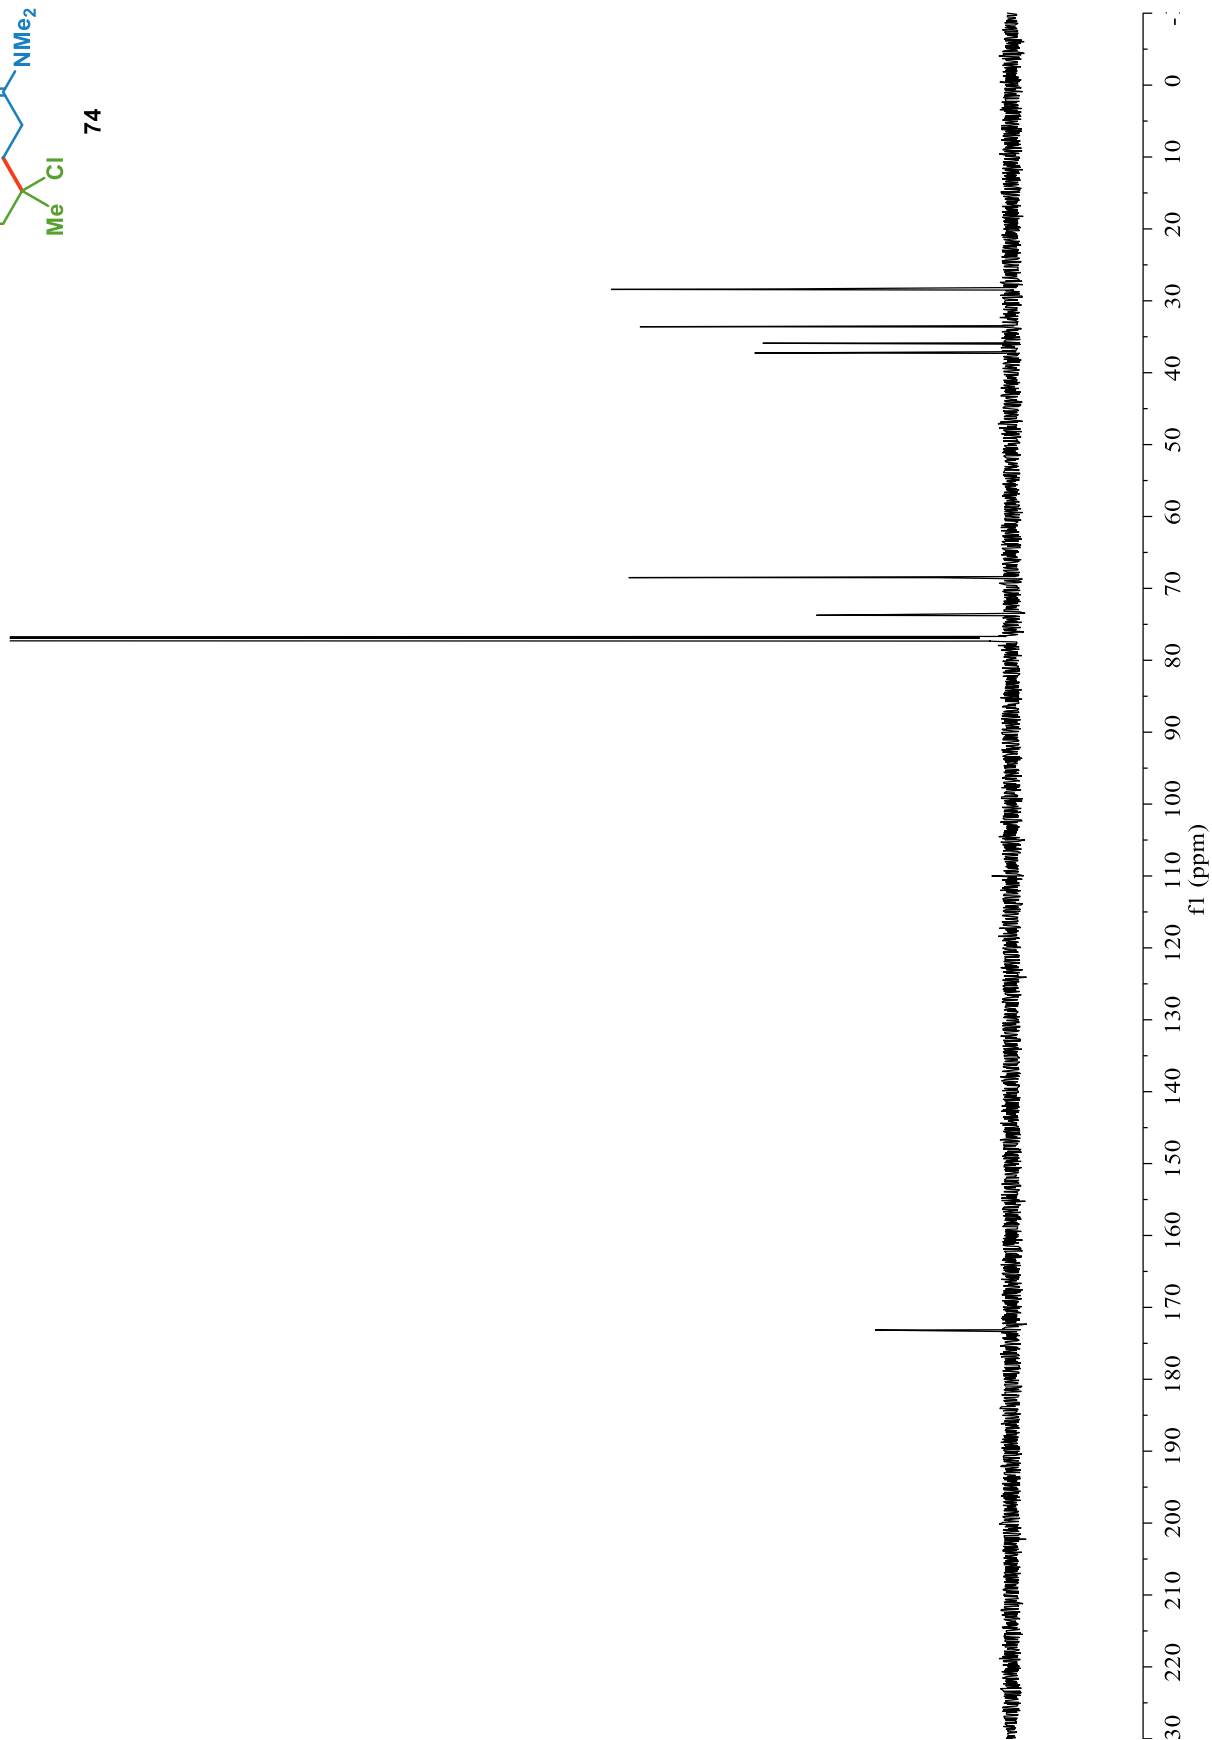

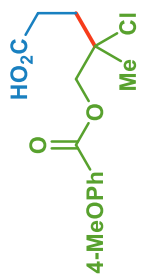

75

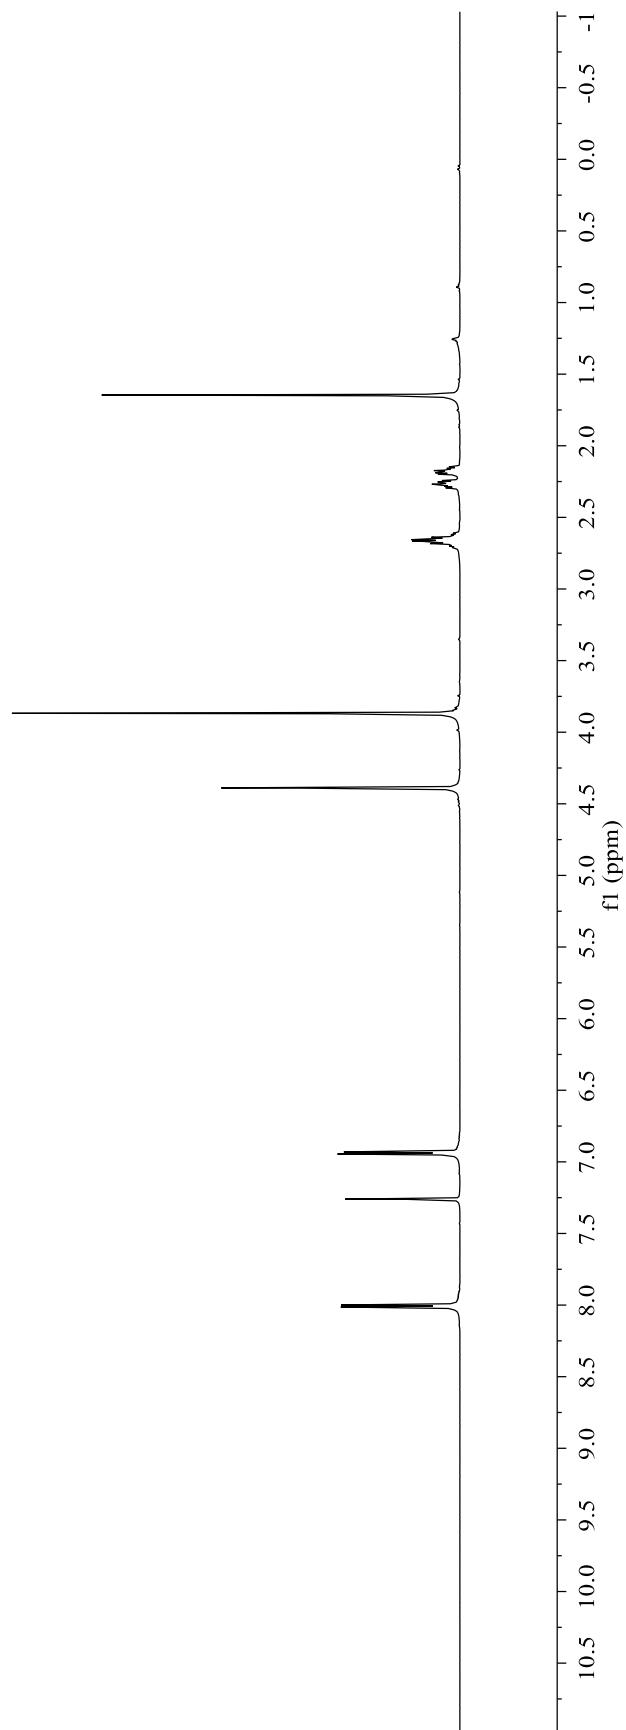

S195

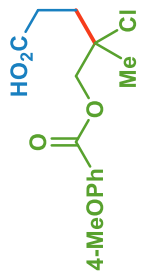

75

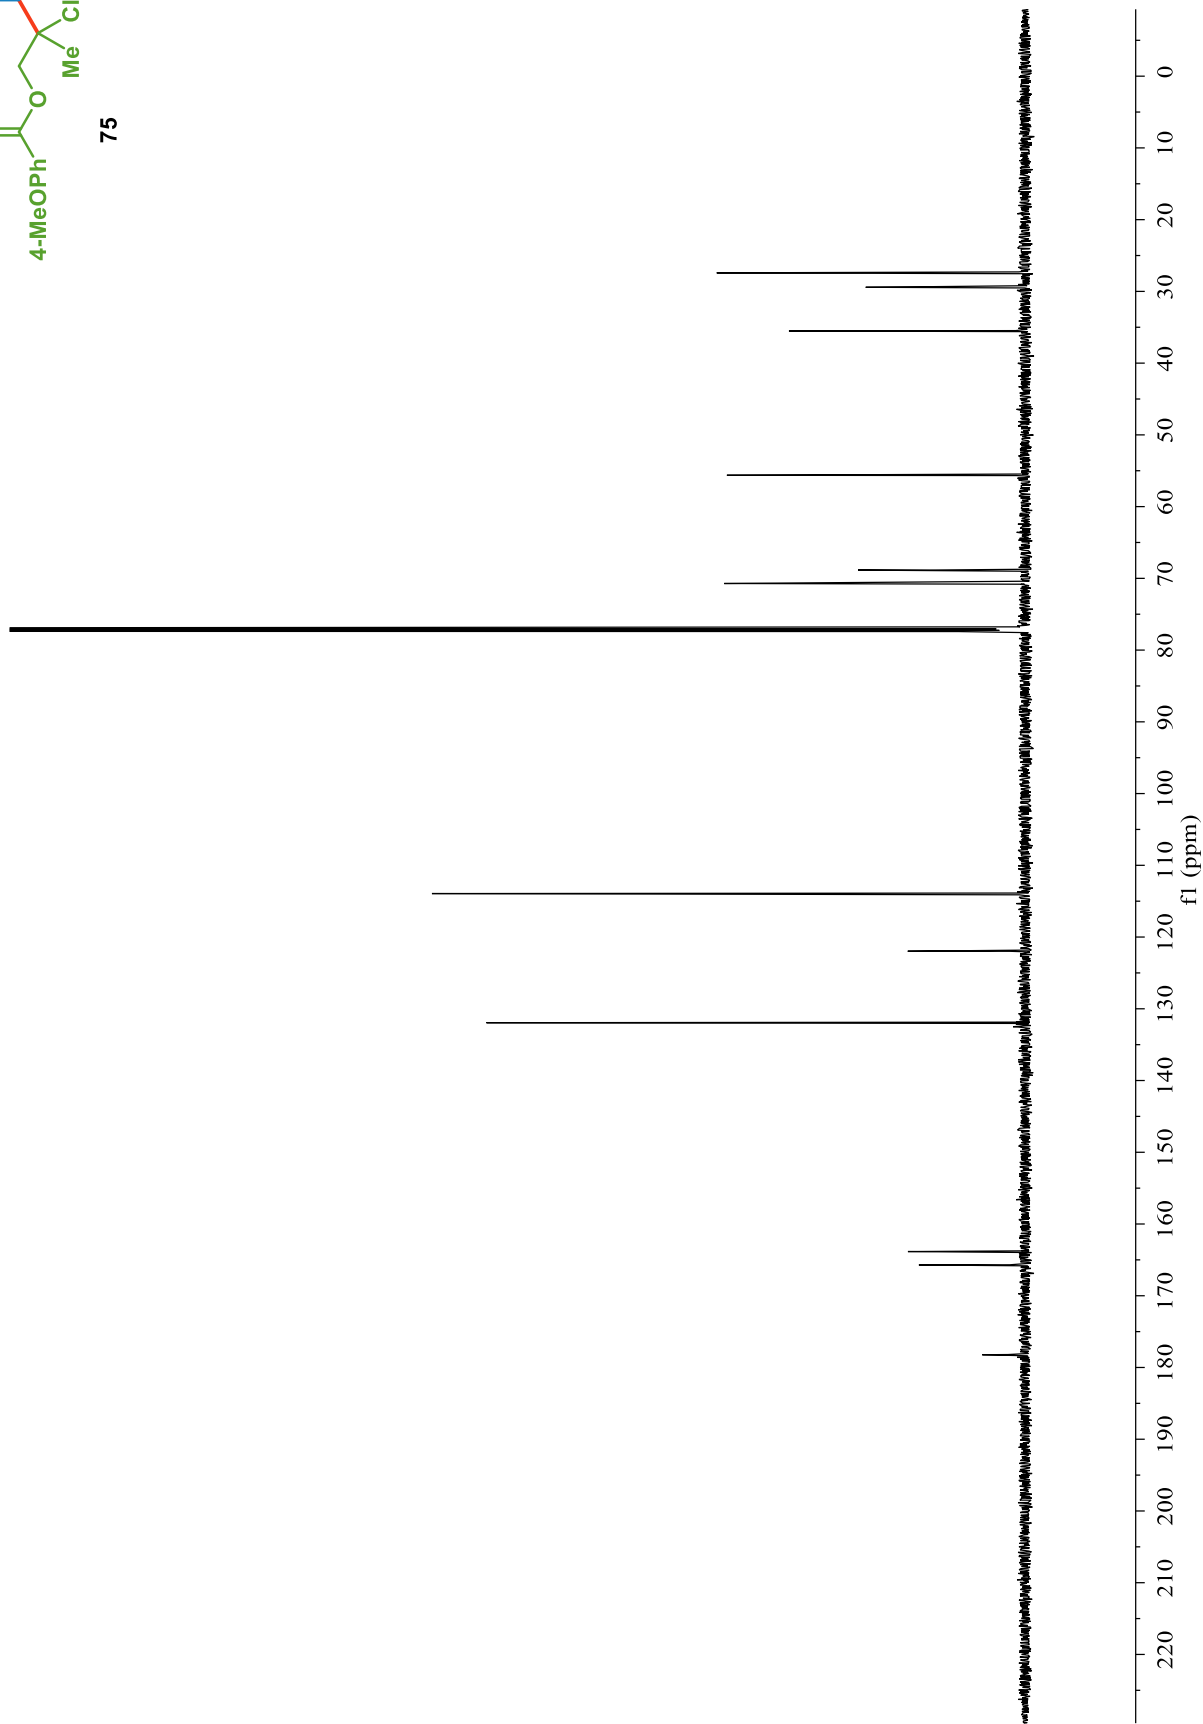

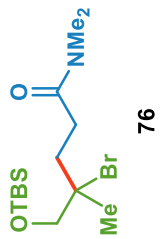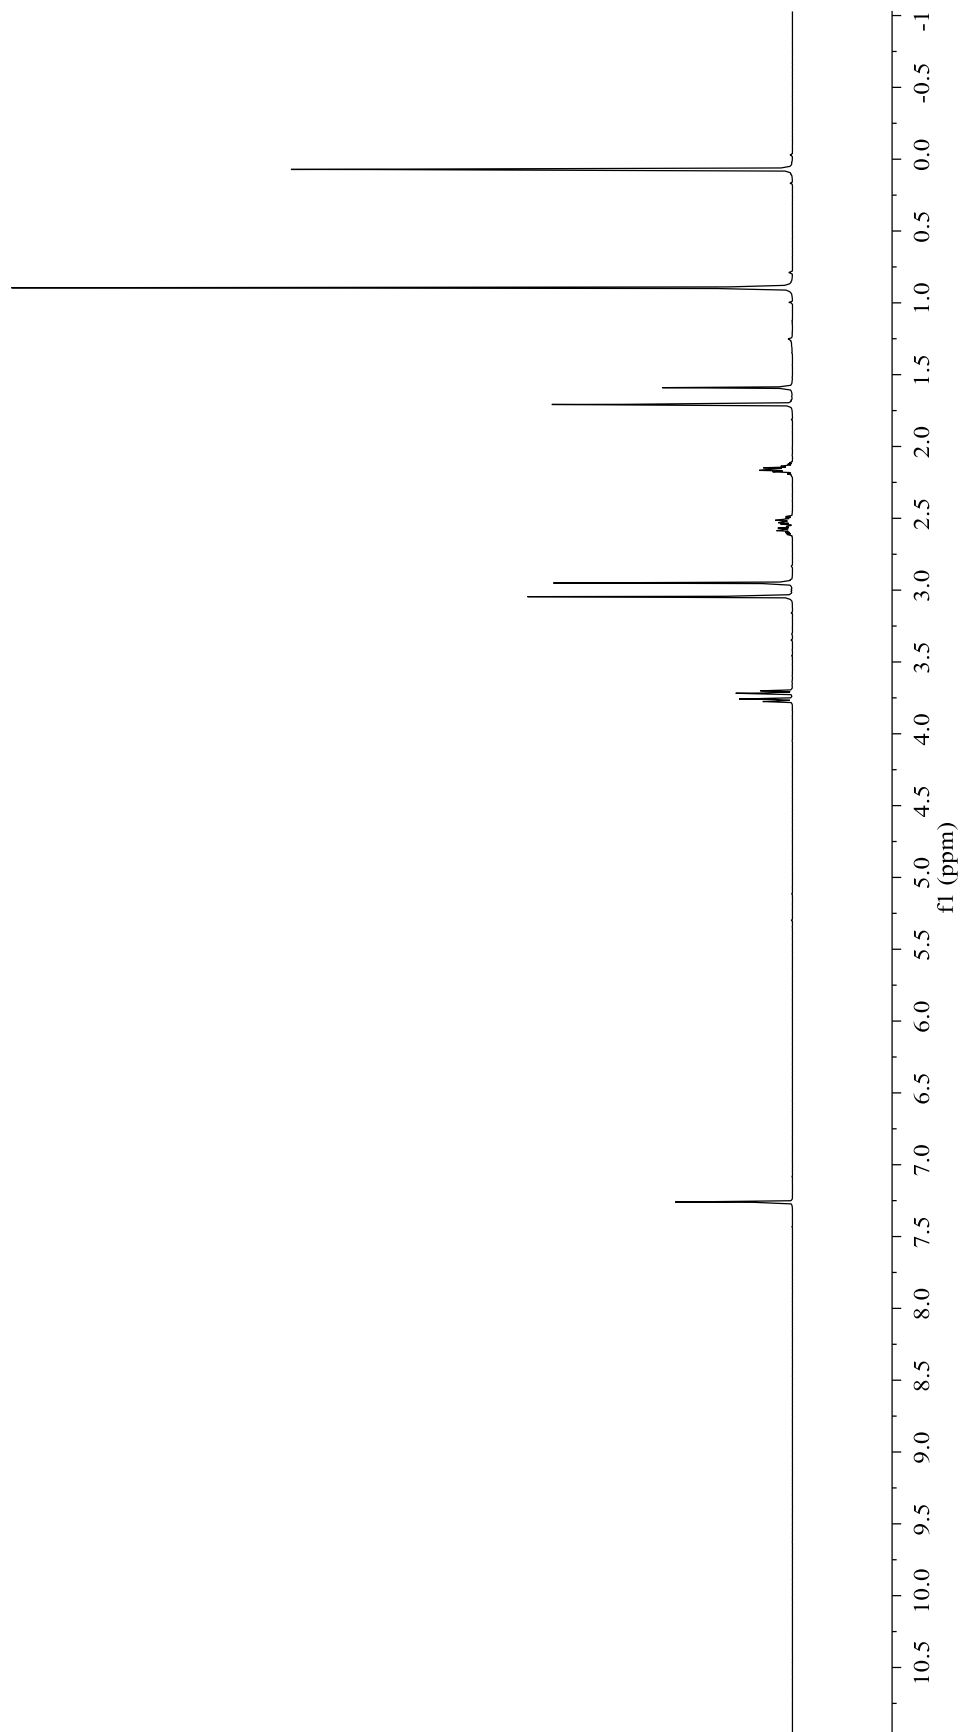



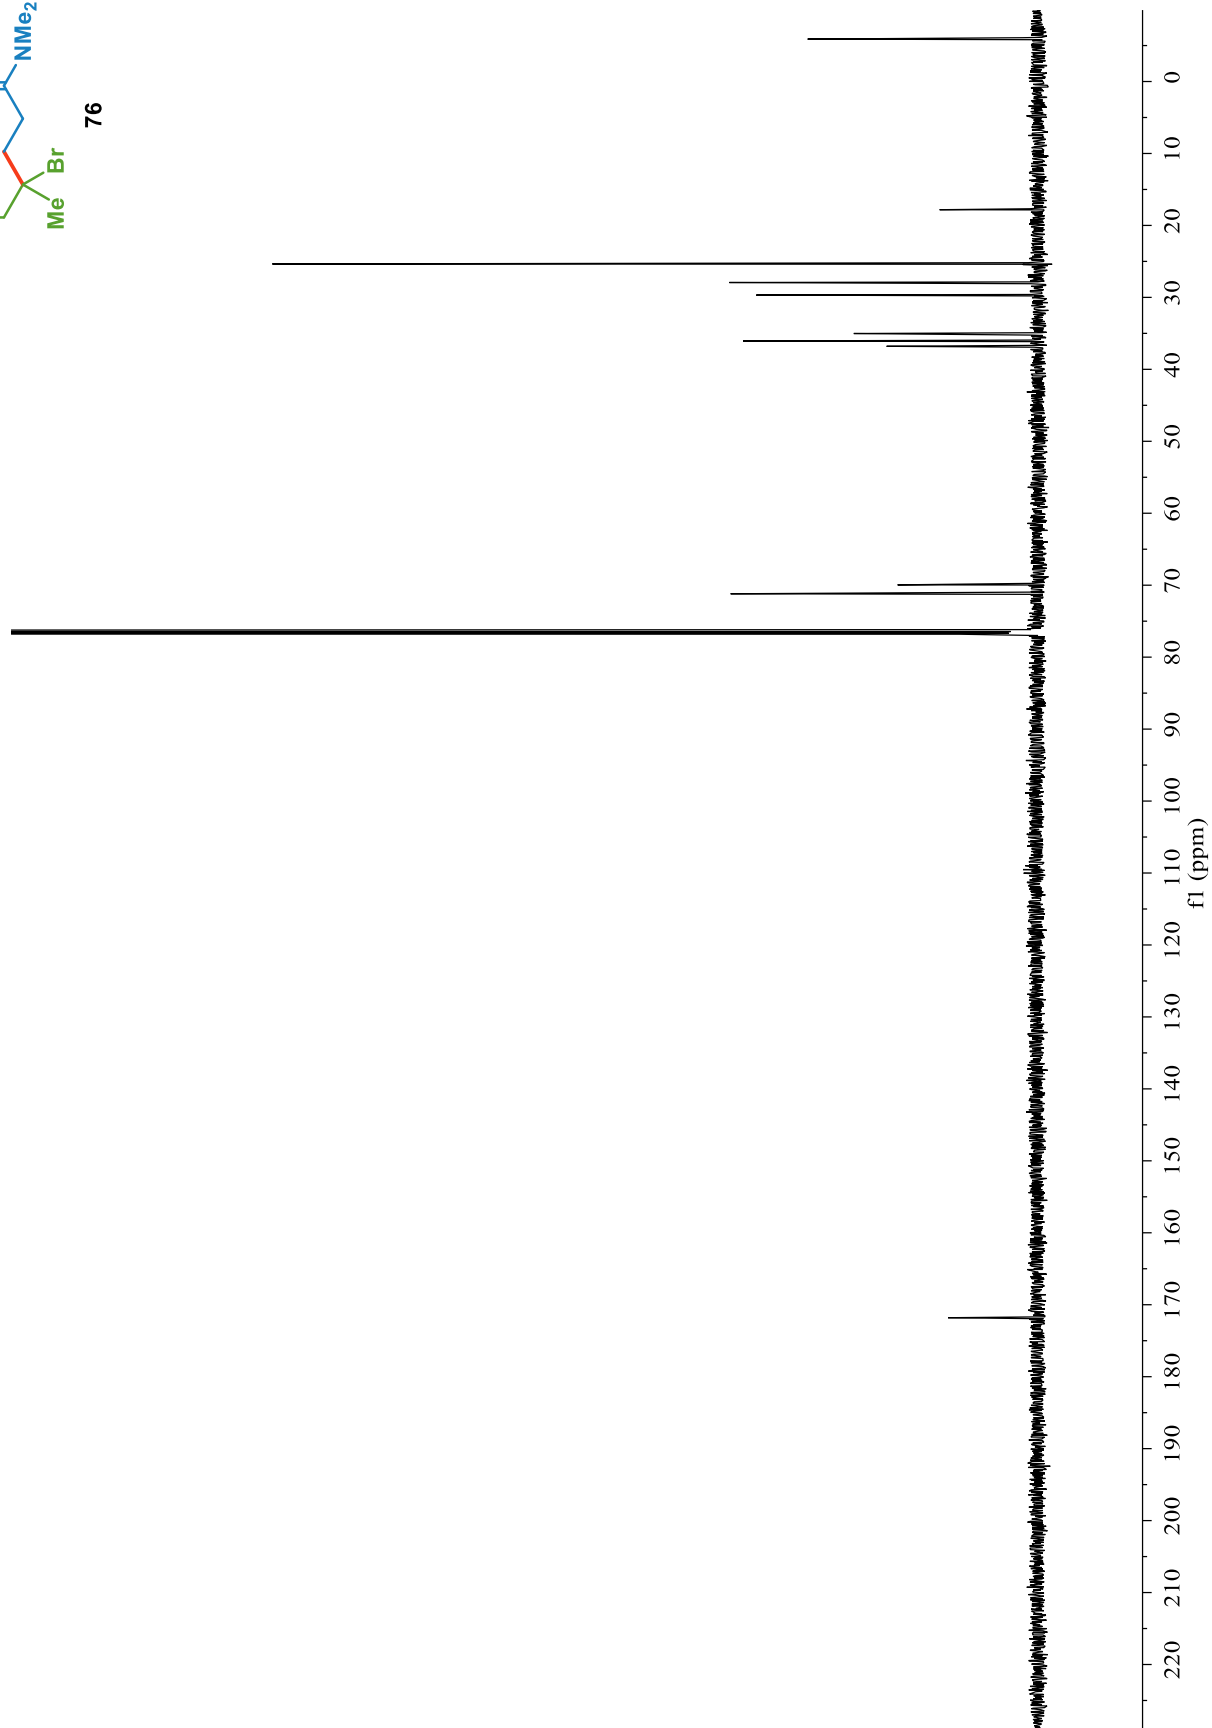

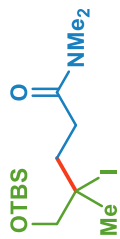

77

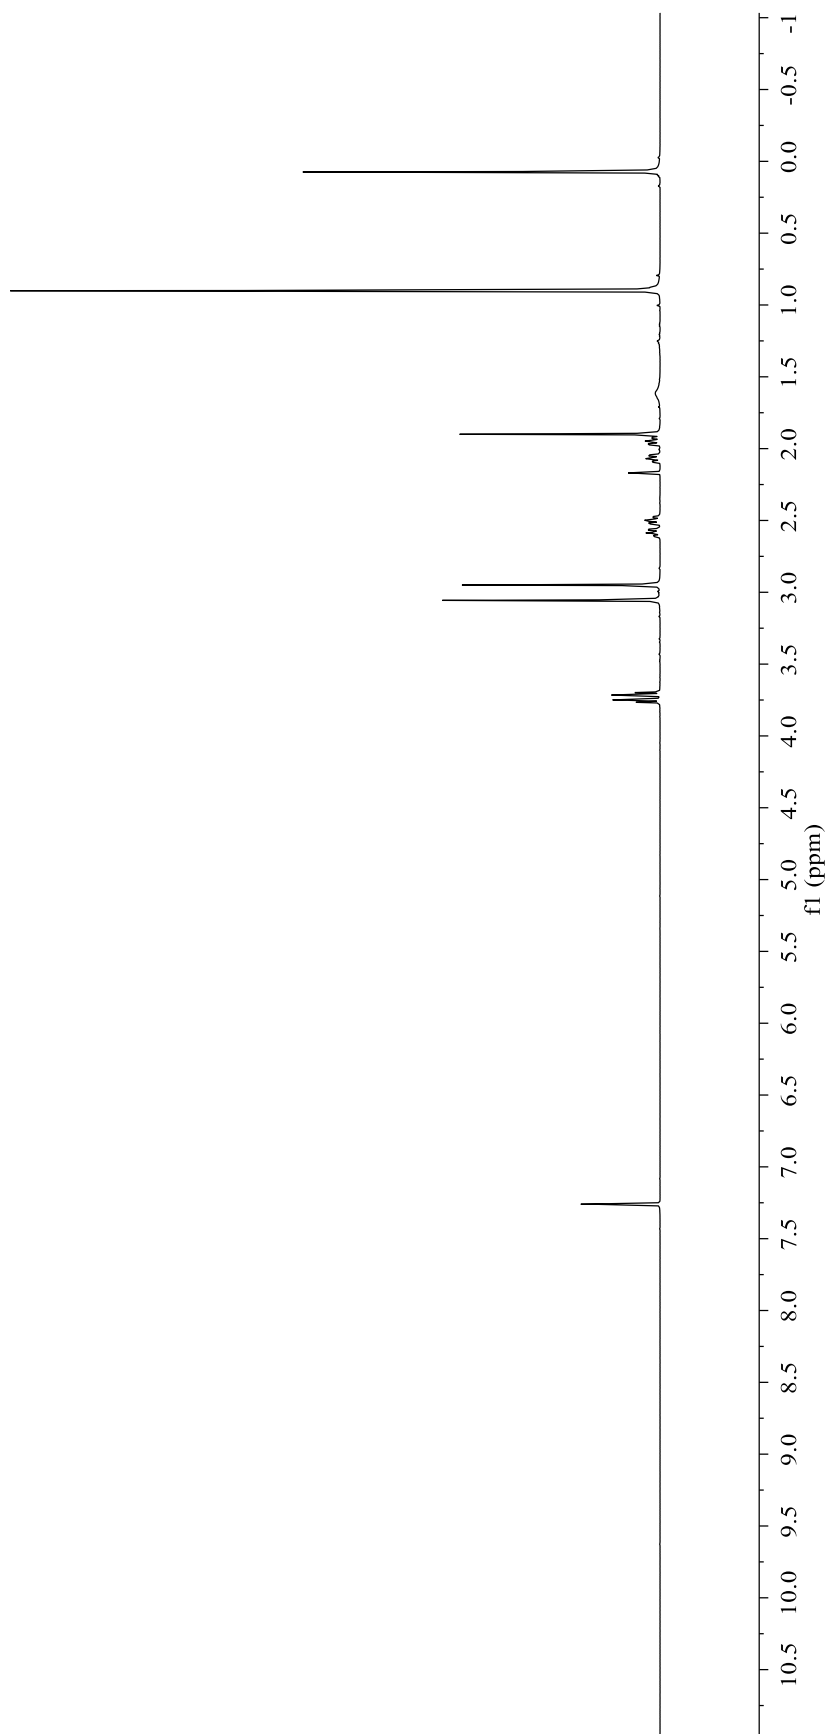



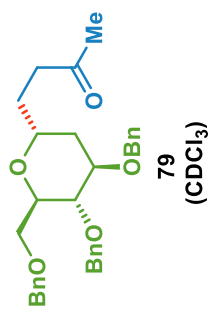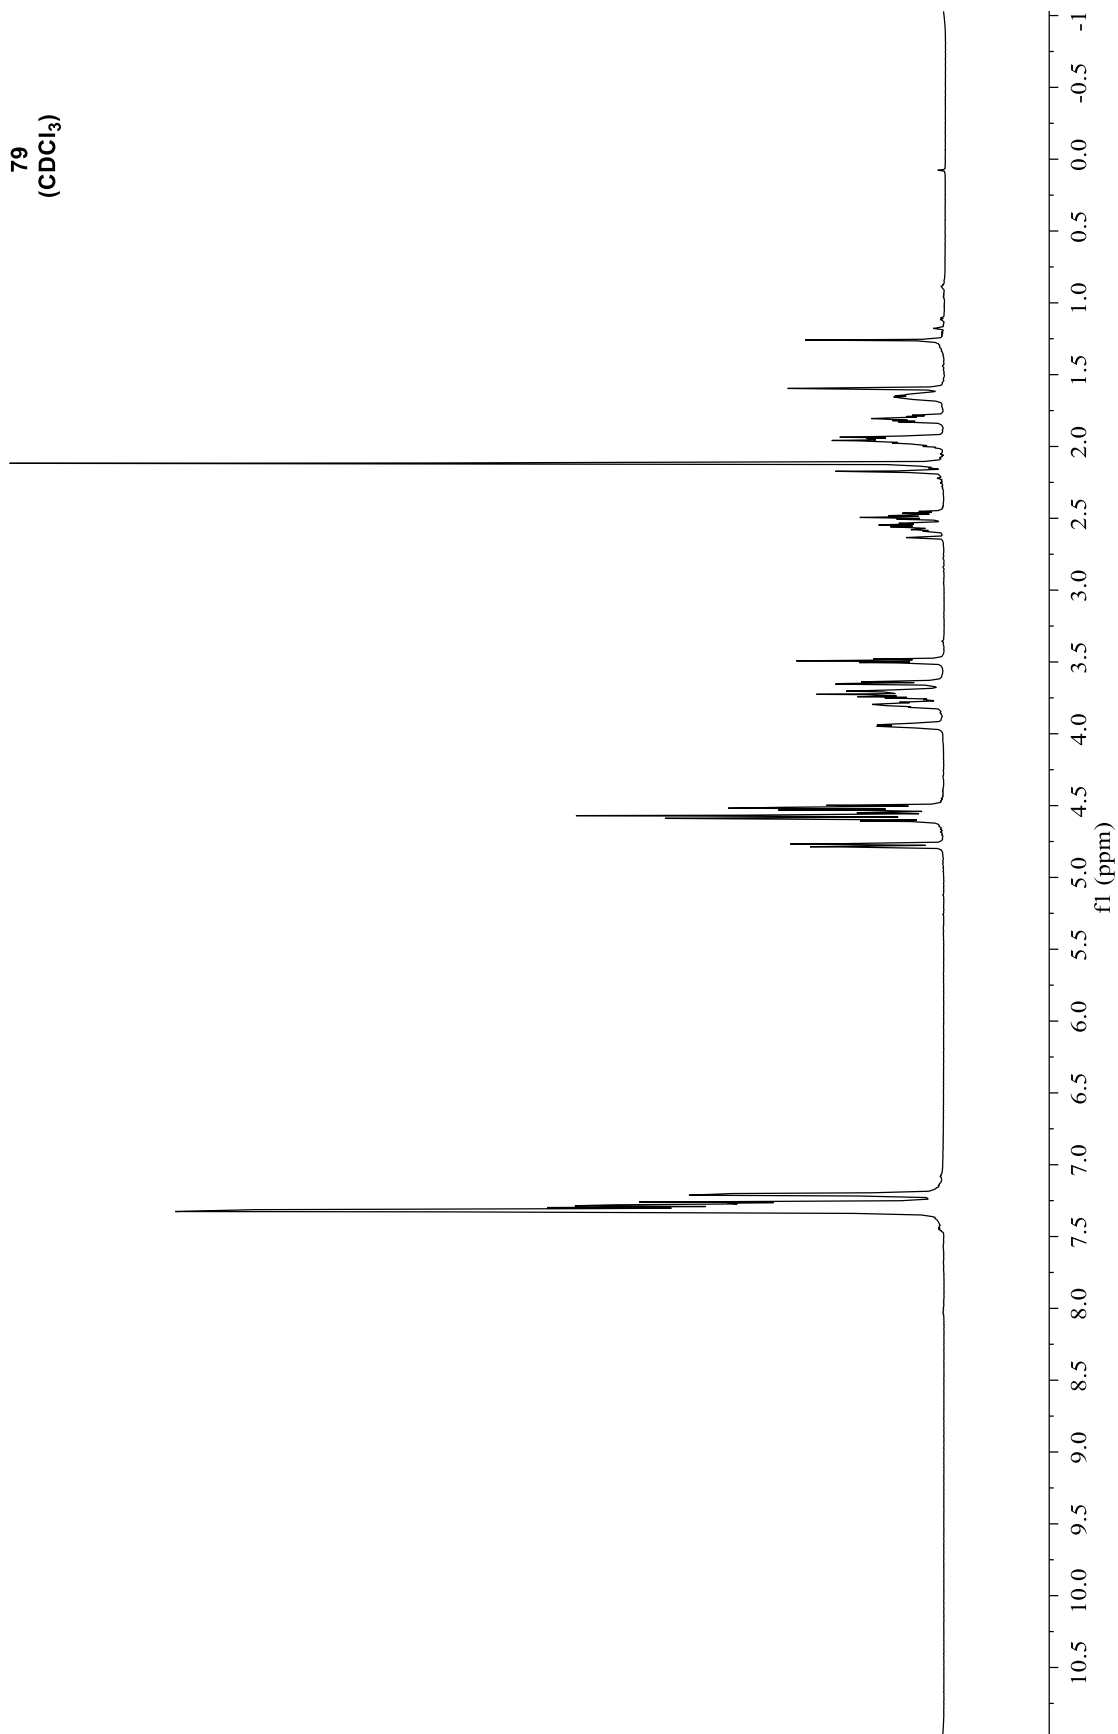

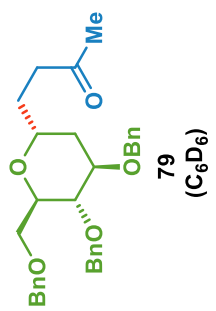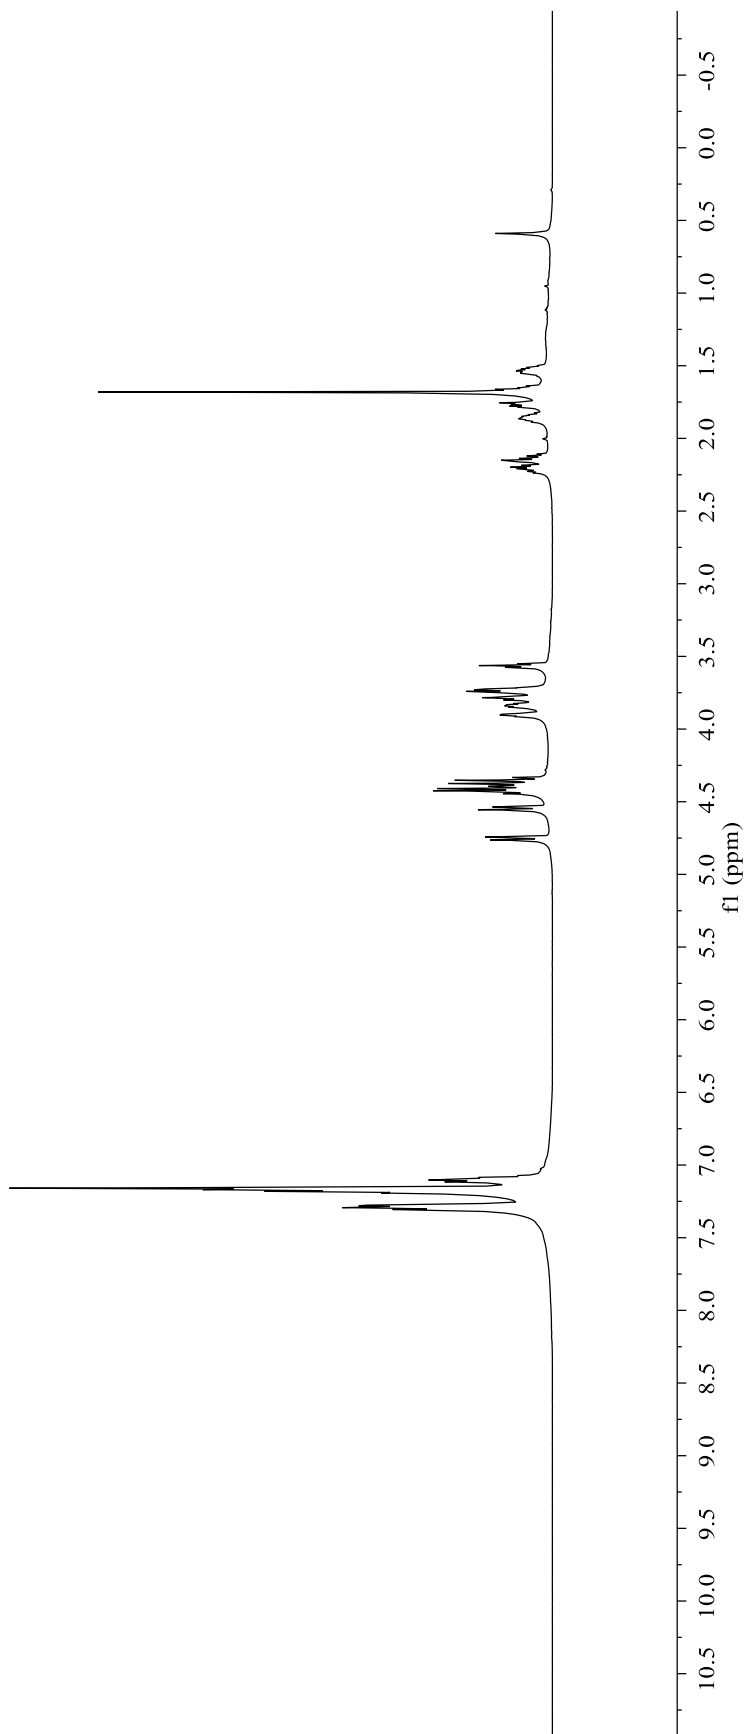

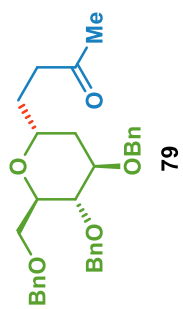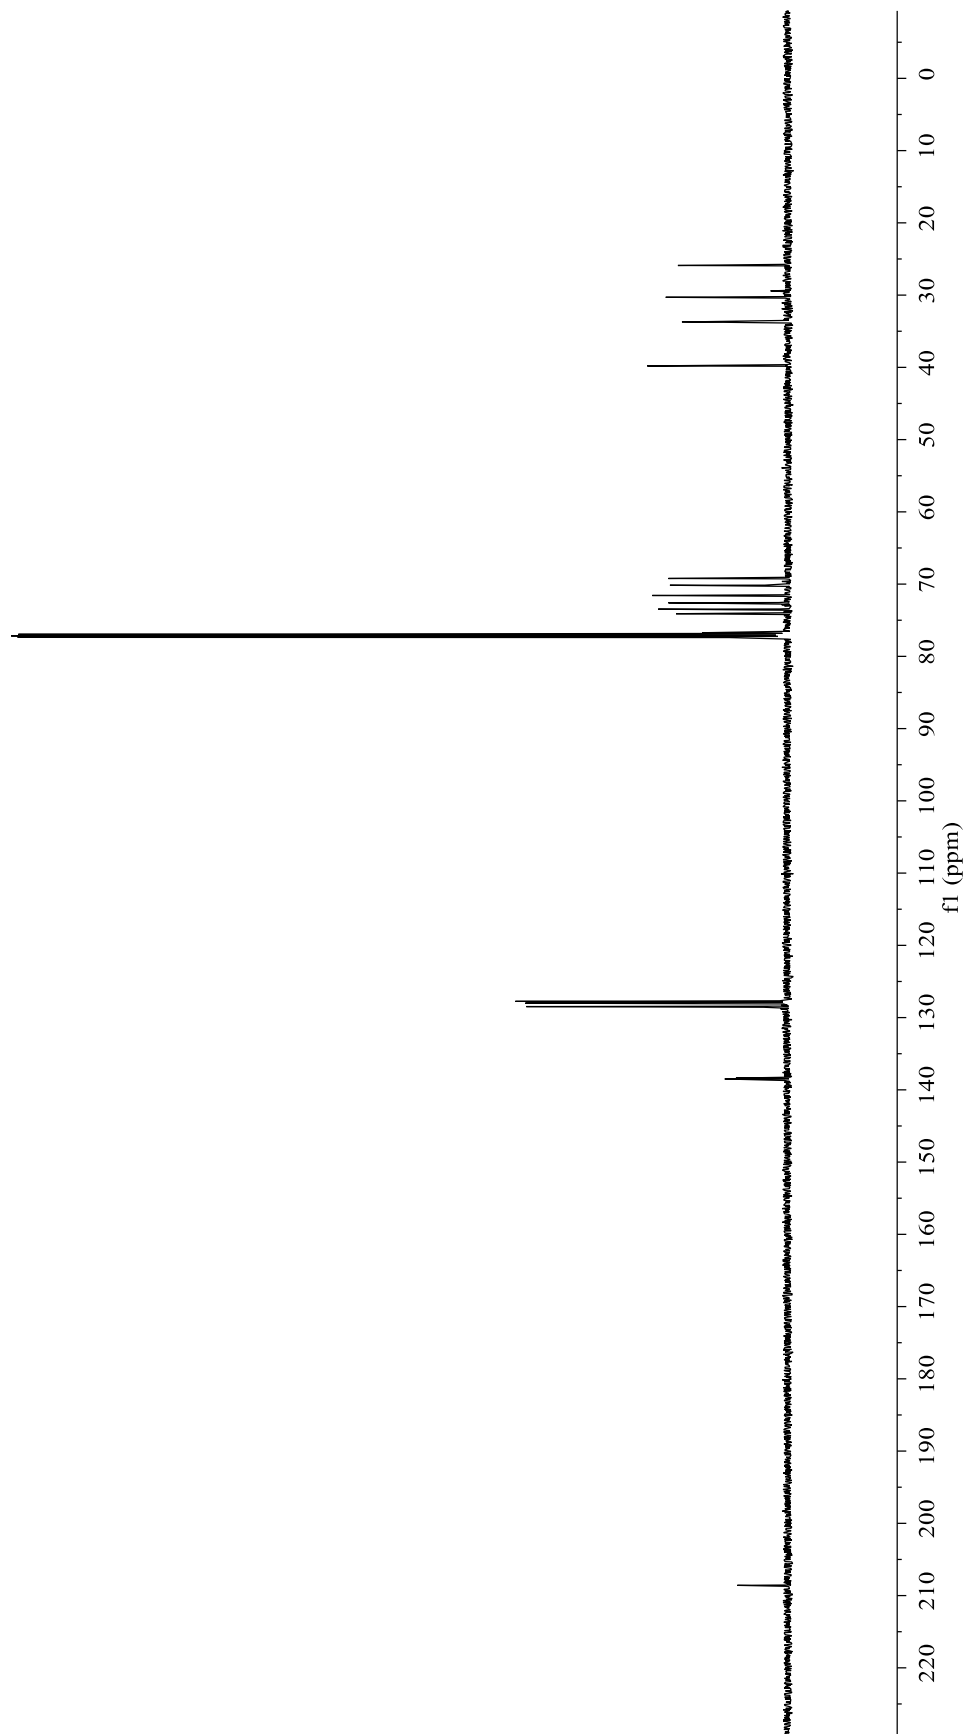



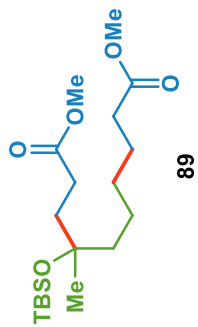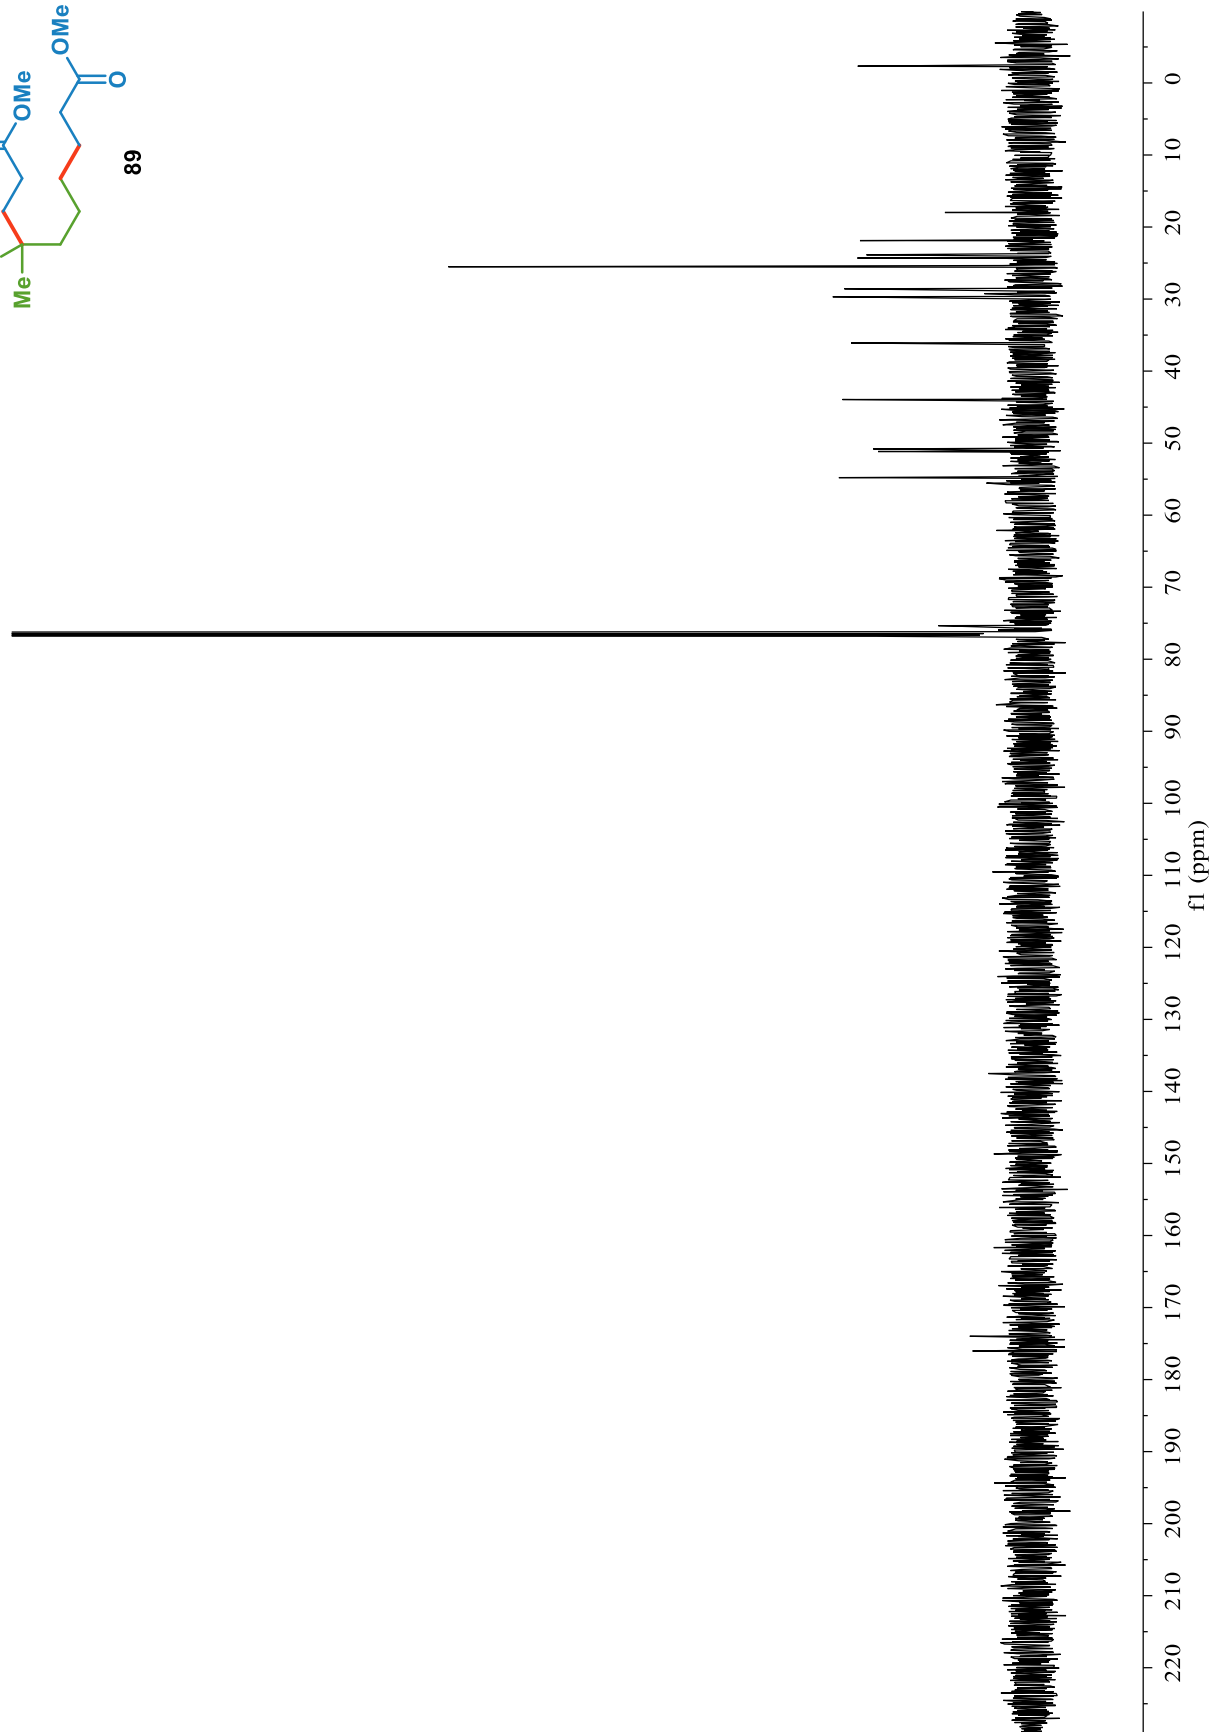







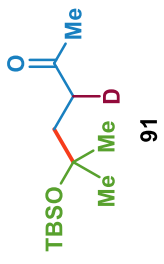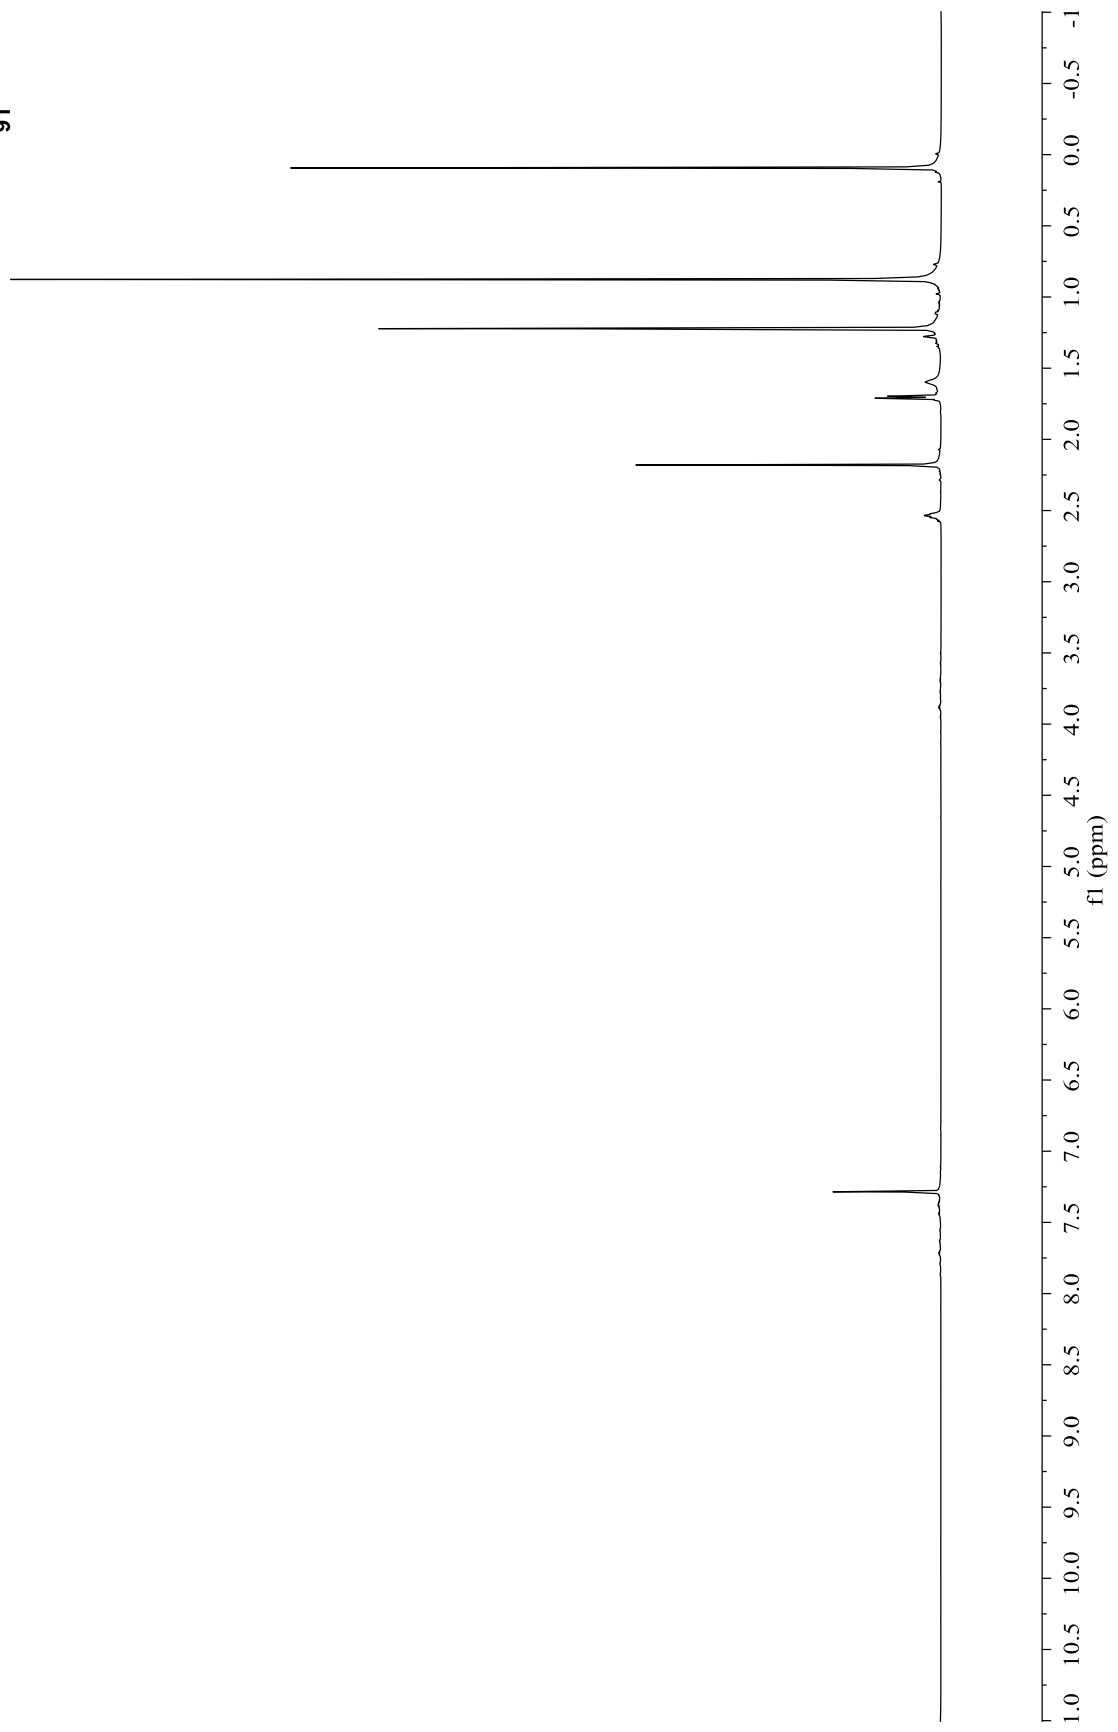

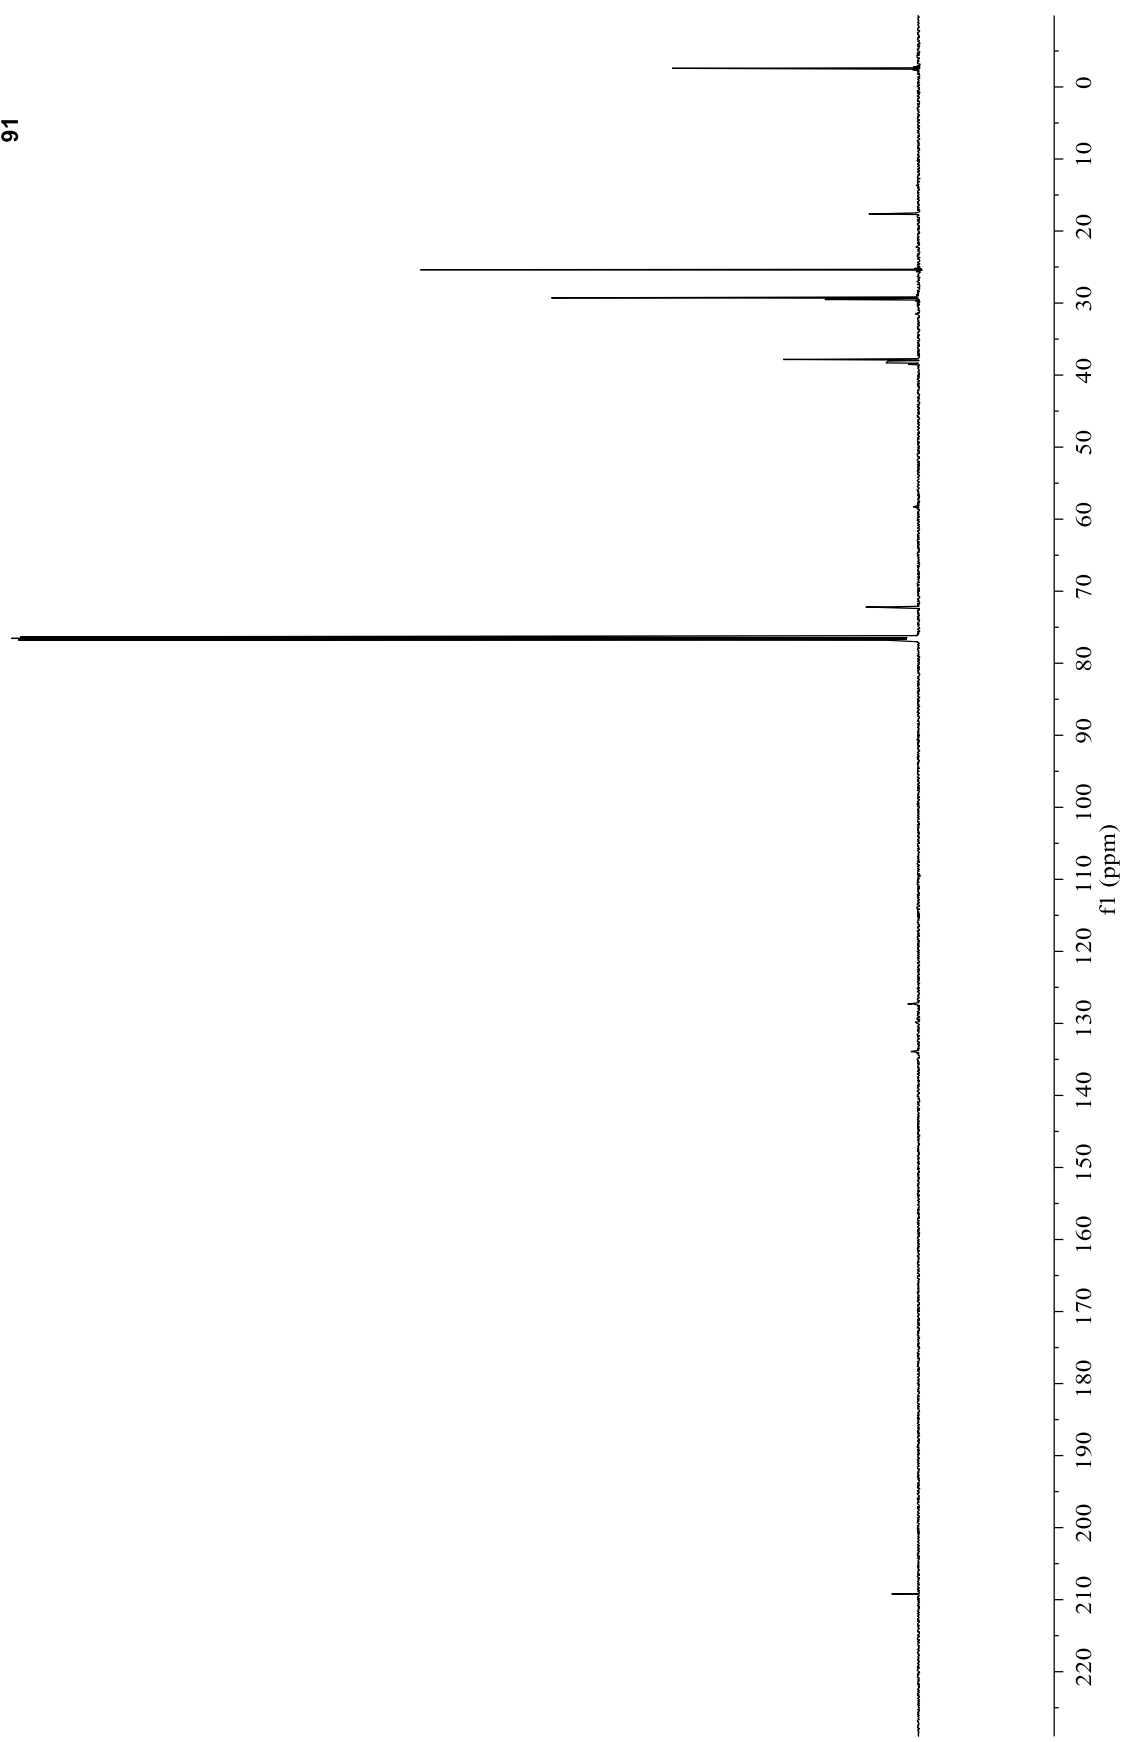

Supplement: NIHMS636805-supplement-1.pdf [file NIHMS636805-supplement-1.pdf]
